# Supplementary material for: Clathrin-independent pathways do not contribute significantly to endocytic flux
Source: eLife. 2014 Sep 17;3:e03970. doi: 10.7554/eLife.03970 (PMC4185422; doi:10.7554/eLife.03970)
Supplement: Figure 1—source data 1. — Biotinylated proteins identified in this study are listed by accession number, together with the estimated abundance takenfrom Kulak et al., 2014. A zero in the biotinylated proteins column indicates that we did not identify that protein. Calculation of PM abundance is described in the methods section. DOI: http://dx.doi.org/10.7554/eLife.03970.004 [file elife03970s001.xlsx]

## Sheet: Sheet1
Plasma membrane proteins [GO:0005886] identified by Kulak et al.	Estimated copy number (Kulak et al.)	PM abundance	biotinylated proteins identified by MS (this study)
P04406	28215370	5.88705	P04406
P68104	20839790	4.34816	P68104
P06733	20262610	4.22773	P06733
P14618	15513000	3.23674	P14618
P10809	14931760	3.11547	P10809
G3XAL0	11017890	2.29885	0
P40926	11017890	2.29885	P40926
E9PDB2	11017890	2.29885	E9PDB2
P08670	10099250	2.10718	P08670
P11142	9523529	1.98706	P11142
P62979	8227745	1.71669	P62979
P04792	7998551	1.66887	P04792
P04083	6736961	1.40565	P04083
Q5T3N1	6736961	1.40565	Q5T3N1
Q99497	6472967	1.35056	Q99497
P00441	6256692	1.30544	P00441
P06576	5457387	1.13867	P06576
P06744	5435960	1.1342	P06744
Q99714	5420690	1.13101	Q99714
A6NE09	5392144	1.12505	A6NE09
P08865	5392144	1.12505	P08865
P07900	5358574	1.11805	P07900
P07237	5269586	1.09948	P07237
P80723	5167605	1.07821	P80723
P49368	4658420	0.971965	P49368
B4DUR8	4658420	0.971965	B4DUR8
G3V361	4393941	0.916782	0
Q96HY3	4393941	0.916782	Q96HY3
P62158	4393941	0.916782	P62158
O00299	4139407	0.863675	O00299
P49773	3926310	0.819213	P49773
P14625	3699856	0.771964	P14625
P25705	3671852	0.766121	P25705
P21796	3629015	0.757183	P21796
F5GZS6	3228631	0.673644	0
P00505	3122892	0.651582	P00505
Q07021	2615237	0.545661	Q07021
P84077	2480858	0.517623	P84077
P02786	2344939	0.489264	P02786
Q8NC51	2297523	0.479371	Q8NC51
Q15046	2261914	0.471941	Q15046
Q01518	2216111	0.462385	Q01518
Q15084	2171246	0.453024	Q15084
P63167	2017996	0.421049	P63167
Q00610	1898133	0.39604	Q00610
P63218	1815375	0.378772	P63218
Q9ULC4	1814666	0.378625	0
P48047	1795728	0.374673	P48047
P26038	1741905	0.363443	P26038
A6NIZ1	1725749	0.360072	A6NIZ1
P61224	1725749	0.360072	P61224
P53396	1719959	0.358864	P53396
P63000	1675011	0.349486	P63000
P61026	1610072	0.335937	P61026
P61769	1605086	0.334896	P61769
F5H6I0	1605086	0.334896	0
Q9Y3F4	1600266	0.333891	Q9Y3F4
B4DNJ6	1600266	0.333891	B4DNJ6
P17931	1550549	0.323517	P17931
P35579	1434248	0.299251	P35579
Q5JQ13	1361580	0.28409	Q5JQ13
P18206	1361580	0.28409	P18206
C9JMD7	1358831	0.283516	C9JMD7
C9J0M4	1358831	0.283516	C9J0M4
C9JQ75	1358831	0.283516	C9JQ75
C9JSP1	1358831	0.283516	C9JSP1
P49327	1299761	0.271191	P49327
Q13283	1290371	0.269232	Q13283
P46940	1221738	0.254912	P46940
P00568	1218579	0.254253	0
P10768	1119622	0.233606	0
P15311	1086345	0.226663	P15311
E7EQR4	1086345	0.226663	E7EQR4
P21964	1050142	0.219109	P21964
Q5JYX0	1010502	0.210838	0
P60953	1010502	0.210838	P60953
P09923	989422	0.20644	P09923
Q09666	989259	0.206406	Q09666
P04632	971383	0.202676	P04632
P61106	963068	0.200941	P61106
Q9P0L0	942510	0.196652	Q9P0L0
C9JPM4	926473	0.193306	C9JPM4
P30043	914836	0.190878	P30043
P55010	914257	0.190757	P55010
H0YN40	914257	0.190757	0
Q9HAV0	893802	0.186489	Q9HAV0
Q07065	866421	0.180776	Q07065
P09496	855261	0.178448	P09496
P68402	845375	0.176385	0
P20073	842880	0.175864	P20073
P51148	832850	0.173772	P51148
Q5JR07	818782	0.170836	Q5JR07
E9PQH6	818782	0.170836	E9PQH6
Q5JR08	818782	0.170836	Q5JR08
P08134	818782	0.170836	P08134
Q5HY54	817252	0.170517	Q5HY54
P21333	817252	0.170517	P21333
Q04917	805769	0.168121	Q04917
H3BMT0	777672	0.162259	0
H3BU16	777672	0.162259	0
H3BMV3	777672	0.162259	0
A6NGP5	777672	0.162259	A6NGP5
Q9H910	777672	0.162259	Q9H910
B4DLH4	777672	0.162259	B4DLH4
P67775	774554	0.161608	P67775
Q14232	750655	0.156622	Q14232
Q15382	749458	0.156372	Q15382
Q9ULV4	743716	0.155174	Q9ULV4
Q13177	735181	0.153393	0
P30520	734870	0.153328	P30520
P49755	728285	0.151954	P49755
P12429	711570	0.148467	P12429
Q9UBI6	710802	0.148307	Q9UBI6
P13987	708951	0.147921	P13987
P35613	697844	0.145603	P35613
P98082	682904	0.142486	0
O75369	679367	0.141748	O75369
O96019	669573	0.139704	0
P53618	651152	0.135861	P53618
P38606	650437	0.135712	P38606
Q15149	649035	0.135419	Q15149
P54578	628389	0.131111	0
P62993	628016	0.131034	P62993
Q15836	623132	0.130015	Q15836
P30519	618242	0.128994	P30519
Q9H4A4	612755	0.127849	0
P30419	608462	0.126954	P30419
E7EVA0	608106	0.12688	E7EVA0
Q9BV57	596570	0.124473	0
Q14696	594531	0.124047	Q14696
P54105	592006	0.12352	P54105
P11233	589879	0.123076	P11233
C9J2Z4	582565	0.12155	C9J2Z4
Q9H4M9	582565	0.12155	Q9H4M9
P05023	576129	0.120208	P05023
O00170	573788	0.119719	0
O15144	571017	0.119141	O15144
Q96CT7	568062	0.118524	Q96CT7
P15924	566862	0.118274	P15924
E7EX44	566435	0.118185	0
P67870	562823	0.117431	P67870
P61006	551334	0.115034	P61006
Q9Y696	551328	0.115033	Q9Y696
E9PNR6	541696	0.113023	0
Q07960	541696	0.113023	Q07960
P35241	537071	0.112058	P35241
P68400	518382	0.108159	0
Q96I99	508401	0.106076	Q96I99
O14745	502854	0.104919	O14745
P15328	500780	0.104486	P15328
P54709	496416	0.103576	P54709
Q01628	478090	0.0997521	Q01628
B4DJ96	476938	0.0995116	0
O95232	476938	0.0995116	0
H0YFF6	472921	0.0986736	0
H0Y3Y4	472921	0.0986736	0
G3V1Q4	472921	0.0986736	0
E7EPK1	472921	0.0986736	0
E7ES33	472921	0.0986736	E7ES33
F5H3Y3	466689	0.0973733	0
Q6IAA8	466689	0.0973733	0
F5GX19	466689	0.0973733	0
P04040	455963	0.0951353	P04040
Q9BUL8	454571	0.0948448	Q9BUL8
P13861	454286	0.0947853	0
Q96TA1	448050	0.0934843	Q96TA1
Q9Y6G9	446158	0.0930895	0
E9PHI6	446158	0.0930895	0
Q9BV40	430771	0.0898791	Q9BV40
P84085	429089	0.0895281	P84085
P62873	413296	0.086233	P62873
P21283	407429	0.0850089	0
E7EV59	407429	0.0850089	0
Q9Y490	407428	0.0850086	Q9Y490
Q15758	398633	0.0831735	Q15758
E9PLT0	396942	0.0828208	0
G5E9Q2	396942	0.0828208	0
O75534	396942	0.0828208	0
P49903	396734	0.0827773	0
P46459	396352	0.0826976	P46459
Q01650	391775	0.0817427	Q01650
P21281	389381	0.0812431	P21281
P10316	387340	0.0808173	P10316
P61077	383012	0.0799142	0
B7Z9P8	381153	0.0795264	B7Z9P8
Q9UHG3	381153	0.0795264	Q9UHG3
B7Z3Y2	381153	0.0795264	B7Z3Y2
P13284	373452	0.0779197	0
O75348	371191	0.0774478	0
Q96CW1	369073	0.077006	0
P08174	361959	0.0755216	P08174
F5H2F9	361357	0.075396	0
P52701	361357	0.075396	0
B4DF41	361357	0.075396	0
P16070	360698	0.0752585	P16070
P50570	360082	0.07513	P50570
P61586	358430	0.0747852	P61586
P17655	358168	0.0747307	0
Q9UNE7	353576	0.0737726	0
Q9H307	350620	0.0731557	0
F2Z2K0	349284	0.072877	0
Q9UNZ2	349284	0.072877	0
P63010	348779	0.0727717	P63010
O76070	346457	0.0722872	0
P14735	332465	0.0693679	P14735
P12814	329094	0.0686646	P12814
B4E2X5	326980	0.0682234	0
P04899	326980	0.0682234	P04899
P30533	322661	0.0673222	P30533
Q9BUQ8	321945	0.0671728	0
O43491	320077	0.0667831	0
O95782	319005	0.0665594	O95782
Q00341	317114	0.066165	Q00341
E9PK47	314572	0.0656345	E9PK47
P06737	314572	0.0656345	P06737
Q8NB16	312870	0.0652794	0
Q9NWT1	310477	0.06478	0
Q92597	309828	0.0646448	0
P09543	309716	0.0646212	P09543
Q9H4A6	307774	0.064216	0
G3V180	307406	0.0641394	0
G3V1D3	307406	0.0641394	0
Q9NY33	307406	0.0641394	Q9NY33
Q15599	303705	0.0633671	0
Q13303	301868	0.0629839	Q13303
P10644	298803	0.0623444	0
Q9UJU6	297627	0.0620989	0
Q16186	296836	0.0619339	Q16186
P21926	296163	0.0617935	P21926
Q12797	295996	0.0617587	Q12797
P51151	289873	0.0604811	P51151
Q09161	283879	0.0592305	0
Q14344	280530	0.0585317	Q14344
Q5H9R7	279299	0.0582749	Q5H9R7
H7BXH2	279299	0.0582749	0
E9PKF6	279299	0.0582749	E9PKF6
P43121	269372	0.0562037	P43121
E7EQT4	266418	0.0555872	0
Q9UKV3	266418	0.0555872	0
Q8N335	263883	0.0550585	0
E9PCB6	259638	0.0541726	E9PCB6
Q9BYT8	259638	0.0541726	Q9BYT8
Q15654	259425	0.0541283	0
Q9NZB2	259315	0.0541054	0
P05556	255872	0.0533869	P05556
Q29RF7	253200	0.0528294	Q29RF7
Q14254	249107	0.0519754	0
P62745	242587	0.0506151	0
P40763	241307	0.050348	P40763
G8JLH9	241307	0.050348	0
P62879	240813	0.0502449	P62879
Q9NP72	239640	0.0500001	Q9NP72
Q9Y5K6	235570	0.0491509	Q9Y5K6
C9JZR2	235474	0.049131	0
O60716	235474	0.049131	0
P07384	233371	0.0486922	P07384
Q9UBB4	231839	0.0483725	Q9UBB4
Q32MZ4	228990	0.0477782	Q32MZ4
F8W8J4	227463	0.0474594	0
Q9NZM1	227463	0.0474594	Q9NZM1
O95817	224707	0.0468845	0
C9JFK9	224707	0.0468845	0
P18031	224548	0.0468514	P18031
P01130	223304	0.0465918	P01130
Q04941	219935	0.0458888	Q04941
P84095	217761	0.0454352	P84095
P22694	216660	0.0452055	0
P14923	215868	0.0450403	P14923
Q13418	213267	0.0444976	Q13418
Q9Y3Z3	211839	0.0441996	0
Q9BRK5	210856	0.0439946	0
P09104	210772	0.043977	P09104
Q14126	210447	0.0439092	Q14126
Q92896	209204	0.0436497	Q92896
Q15286	209145	0.0436374	Q15286
Q9BTE3	208805	0.0435665	Q9BTE3
O14907	207630	0.0433215	0
F8VRN8	207183	0.043228	0
F8VQE1	207183	0.043228	0
Q9UHB6	207183	0.043228	Q9UHB6
O95630	199276	0.0415784	0
C9JK83	199276	0.0415784	0
Q9UH65	198296	0.0413739	0
P41240	198129	0.0413391	0
B4DKT0	198048	0.0413221	0
Q9H8Y8	198048	0.0413221	0
P53985	197301	0.0411663	P53985
Q5T8R5	197301	0.0411663	Q5T8R5
G3V1U3	196949	0.0410927	0
P50579	196949	0.0410927	0
B4DUX5	196949	0.0410927	0
Q16643	196110	0.0409178	0
Q9UK41	193916	0.04046	0
F8W845	192020	0.0400645	0
P35221	192020	0.0400645	P35221
Q9UBC2	186970	0.0390107	0
B7Z5N7	186003	0.038809	0
Q8WVM8	186003	0.038809	Q8WVM8
Q9UDY4	183189	0.0382219	0
P48059	182548	0.0380882	0
O00592	182332	0.0380431	O00592
P46108	180641	0.0376903	0
Q5R363	179938	0.0375435	0
Q96SB4	179938	0.0375435	0
H3BLV9	179938	0.0375435	0
P53384	178473	0.0372378	0
Q15833	178393	0.0372211	Q15833
P51809	176329	0.0367905	P51809
Q8NFH5	175742	0.036668	0
Q8TCT9	175324	0.0365807	Q8TCT9
Q02750	170516	0.0355776	Q02750
Q7Z6M1	170233	0.0355185	0
F5H6E2	164932	0.0344125	0
O00159	164932	0.0344125	0
Q9UBR2	163910	0.0341993	Q9UBR2
Q9UKS6	163586	0.0341317	0
Q15942	162333	0.0338702	0
H3BR18	161700	0.0337382	0
H3BV99	161700	0.0337382	0
H3BM38	161700	0.0337382	0
O00161	161700	0.0337382	0
Q99816	160654	0.0335199	0
F5H442	160654	0.0335199	0
Q96FQ6	155652	0.0324763	Q96FQ6
O75116	152222	0.0317606	0
P53680	150449	0.0313906	P53680
Q9H2H9	147793	0.0308366	Q9H2H9
Q10589	143725	0.0299877	Q10589
P80303	142972	0.0298307	P80303
P08754	142505	0.0297332	P08754
Q9NQC3	138787	0.0289575	Q9NQC3
O75695	137486	0.028686	0
P50151	137430	0.0286744	P50151
P01112	131924	0.0275255	P01112
Q96BS2	128996	0.0269147	0
P08962	128163	0.0267408	P08962
Q9Y3L5	127048	0.0265081	Q9Y3L5
P13473	125869	0.0262622	P13473
O15427	125759	0.0262393	O15427
Q9Y446	124472	0.0259707	0
Q29963	123324	0.0257311	0
Q14160	121807	0.0254147	0
F5GXW0	118900	0.0248082	0
P00813	118900	0.0248082	0
F5GWI4	118900	0.0248082	0
P62330	118716	0.0247698	P62330
P29992	118344	0.0246922	P29992
Q93050	118033	0.0246272	0
P11166	117160	0.0244452	P11166
Q13620	115593	0.0241182	0
O00186	115060	0.0240069	O00186
F8WAK8	114902	0.023974	0
Q8N3U4	114902	0.023974	0
Q9UL26	113917	0.0237685	0
E7ENA9	113157	0.0236098	E7ENA9
Q92542	113157	0.0236098	Q92542
Q9NRR3	112064	0.0233817	0
P29353	111966	0.0233613	0
Q92797	111764	0.0233192	Q92797
P62834	111219	0.0232055	P62834
Q15527	110828	0.0231239	0
Q01844	109669	0.022882	0
Q99653	108394	0.0226162	Q99653
Q9BQ39	107861	0.0225048	0
P50552	107278	0.0223833	P50552
Q6ZRP7	107143	0.022355	0
Q8N8S7	106961	0.0223171	0
P52735	106531	0.0222274	0
P62166	106442	0.0222087	0
Q13564	104048	0.0217093	0
P49841	103163	0.0215247	0
P51153	102592	0.0214055	P51153
Q6P1M0	101994	0.0212808	0
Q8N0X7	101826	0.0212458	0
P63092	101638	0.0212065	P63092
Q93052	101592	0.0211968	0
Q9Y6M0	100989	0.0210711	Q9Y6M0
Q9UI12	100077	0.0208807	Q9UI12
Q08722	99517.8	0.0207641	Q08722
Q9NQX3	98858.4	0.0206265	Q9NQX3
Q13555	97689.4	0.0203826	0
G3V1L9	97340.4	0.0203098	0
Q07157	97340.4	0.0203098	0
Q99735	96249.6	0.0200822	Q99735
Q5T1C6	96057.1	0.020042	0
O43752	94848.5	0.0197898	0
O43663	94389.1	0.019694	0
H9KV59	94389.1	0.019694	0
P49023	94096.1	0.0196329	0
P20020	94016.4	0.0196162	P20020
P31751	94009.3	0.0196148	0
Q9HD15	93633.5	0.0195363	0
O00401	93627.6	0.0195351	0
P32121	93238.1	0.0194539	0
Q9H2M9	93133.1	0.0194319	0
P00533	92674.5	0.0193363	P00533
E9PFD7	92674.5	0.0193363	0
O43159	91528.6	0.0190972	0
P10301	91455.4	0.0190819	P10301
P11171	90474.5	0.0188772	0
E9PIY6	90011.7	0.0187807	0
Q8N6H7	90011.7	0.0187807	0
Q9ULC3	89939	0.0187655	0
Q96B97	89628.2	0.0187006	0
Q9NS86	89102.4	0.018591	Q9NS86
Q93034	88988.9	0.0185673	0
P05067	88908.3	0.0185504	P05067
Q9NPF0	88114.6	0.0183848	0
Q9H223	88095.1	0.0183808	Q9H223
Q9NWZ3	87780.8	0.0183152	0
Q9Y624	86958.4	0.0181436	Q9Y624
Q6NYC1	86067.3	0.0179577	Q6NYC1
P78310	85842.2	0.0179107	P78310
O15357	85576.5	0.0178553	0
Q9UDY2	85010.8	0.0177372	0
O60266	84846.4	0.0177029	0
Q6NX52	84662.2	0.0176645	0
Q92888	84662.2	0.0176645	0
P52569	84106.9	0.0175486	P52569
C9J4Q3	84039.8	0.0175347	0
Q9NZW5	84039.8	0.0175347	0
B8ZZG1	84039.8	0.0175347	0
P05026	83774.5	0.0174793	P05026
Q9NVD7	83439.4	0.0174094	0
P48960	82859.9	0.0172885	P48960
P07948	81483.4	0.0170013	P07948
Q5T0N5	80853.7	0.0168699	0
P19174	80452	0.0167861	0
O14966	79548.1	0.0165975	O14966
Q5UIP0	79458.8	0.0165788	Q5UIP0
P61764	78940.9	0.0164708	P61764
O75122	78904.7	0.0164632	O75122
Q9Y4G6	77847.5	0.0162427	0
Q9HD26	77014.8	0.0160689	0
Q96A65	76612.6	0.015985	Q96A65
P98196	74993.6	0.0156472	0
Q9C037	74865	0.0156204	0
Q96QD8	74845.4	0.0156163	0
O95466	74733.2	0.0155929	0
O00560	74502.5	0.0155447	0
Q9Y6G3	74375.2	0.0155182	0
A6NCI0	74375.2	0.0155182	0
Q9UIW2	73567.7	0.0153497	Q9UIW2
Q92506	72386.6	0.0151032	Q92506
P42566	72354.1	0.0150965	0
P41743	72034	0.0150297	0
O94875	71983.4	0.0150191	0
Q13445	71796.1	0.01498	Q13445
H3BV22	71487.4	0.0149156	0
P60510	71487.4	0.0149156	0
H3BTA2	71487.4	0.0149156	0
P01116	70989.7	0.0148118	P01116
Q9NPQ8	70201.6	0.0146473	0
O94973	70079.6	0.0146219	O94973
Q96FF9	69743.2	0.0145517	0
B5MBX0	69743.2	0.0145517	0
Q8WTV0	69381.2	0.0144762	Q8WTV0
Q14573	69012.3	0.0143992	0
P20339	68671.2	0.014328	P20339
Q8NC96	67672.8	0.0141197	0
Q8IXI2	67283.5	0.0140385	0
Q96KP1	66856	0.0139493	0
Q01581	66053.2	0.0137818	Q01581
Q17RY6	65880.4	0.0137458	0
Q13671	65437.5	0.0136533	0
Q96FJ2	64111.6	0.0133767	0
Q01629	64102.1	0.0133747	Q01629
Q9HBH0	63977.1	0.0133486	0
Q8N5I2	63682.9	0.0132872	0
P07947	63595.4	0.013269	P07947
E9PBR5	63520.8	0.0132534	0
Q05209	63520.8	0.0132534	0
P19256	62834.3	0.0131102	P19256
P14384	62496	0.0130396	P14384
Q5VW52	61406.9	0.0128124	0
Q9HCL2	61406.9	0.0128124	0
Q5JXI8	60664	0.0126574	0
Q13642	60664	0.0126574	0
Q16512	60466.8	0.0126162	0
P42785	60400.8	0.0126025	P42785
P42892	60094.2	0.0125385	P42892
Q9UM54	60073.9	0.0125342	0
O43795	59722.3	0.0124609	0
Q9Y6M5	58764.9	0.0122611	Q9Y6M5
Q9UNQ0	58614	0.0122296	Q9UNQ0
E5RFT1	56970.4	0.0118867	E5RFT1
Q15043	56970.4	0.0118867	Q15043
O14672	56929.1	0.0118781	O14672
Q13685	56666.2	0.0118232	0
O14578	56182.4	0.0117223	0
Q8IXI1	56012.8	0.0116869	Q8IXI1
P63096	55828.6	0.0116485	P63096
Q9NRK6	55520.5	0.0115842	Q9NRK6
O95721	54955	0.0114662	0
Q12846	54942.7	0.0114636	0
P05362	54886.7	0.0114519	P05362
Q96PU5	54739.9	0.0114213	0
P61020	54666.9	0.0114061	P61020
Q8NHG7	53916.2	0.0112494	0
P15291	53752.5	0.0112153	P15291
Q6YHK3	53267.3	0.0111141	Q6YHK3
Q9NP58	52846.7	0.0110263	Q9NP58
Q9NVV4	52840.9	0.0110251	0
O75330	52746.5	0.0110054	0
Q9H2K8	52639.3	0.010983	0
O43665	51687.7	0.0107845	0
H7C024	51164.8	0.0106754	0
P35052	51164.8	0.0106754	P35052
H7C410	51164.8	0.0106754	0
P17706	51041.2	0.0106496	0
Q9BSL1	50959.1	0.0106325	0
P49407	50916.7	0.0106236	0
Q13416	50803.6	0.0106	0
Q9UPT5	50802.9	0.0105999	0
O95716	50620.8	0.0105619	0
E5RGN0	50290.2	0.0104929	0
Q00536	50290.2	0.0104929	0
A8MYB8	50160.8	0.0104659	A8MYB8
I3L3I9	50160.8	0.0104659	0
P30838	50160.8	0.0104659	P30838
P16333	49266.3	0.0102793	0
Q8IYB5	49208.4	0.0102672	0
Q9H6S3	48196.3	0.010056	0
B7ZKL3	48196.3	0.010056	0
Q8TD16	48176.5	0.0100519	0
P30456	47716.7	0.00995593	0
P18462	47716.7	0.00995593	0
P30450	47716.7	0.00995593	0
P16190	47716.7	0.00995593	0
P30453	47716.7	0.00995593	0
P30457	47716.7	0.00995593	0
Q12979	47548.3	0.00992082	0
P62070	47451.2	0.00990056	P62070
Q96D53	46685.5	0.00974079	Q96D53
O14917	46590.9	0.00972106	O14917
P42574	46553.6	0.00971327	P42574
P08195	46365.7	0.00967405	P08195
O75787	45524.8	0.00949861	0
Q00587	45373.1	0.00946696	0
Q96P48	44927.2	0.00937393	0
Q8WWI5	44886.1	0.00936534	Q8WWI5
P48509	44492.2	0.00928315	P48509
Q9Y5X1	44463	0.00927707	0
P01891	43857.8	0.00915079	P01891
P30825	43795.6	0.00913783	P30825
O75044	43789.9	0.00913663	0
Q99959	42920.1	0.00895515	0
Q15700	42207.5	0.00880648	0
Q53GS7	42136.6	0.00879168	Q53GS7
Q9NVZ3	41804.5	0.00872238	0
O60262	41789.4	0.00871923	0
Q9UHR4	40792.7	0.00851128	0
P46934	40543.5	0.00845928	0
Q9NYJ8	40240.3	0.00839602	0
Q6NZI2	39778.8	0.00829972	0
Q12974	39362.7	0.0082129	0
A6NED2	38623.7	0.00805871	0
G3V2I3	38623.7	0.00805871	0
O95425	38263.2	0.0079835	0
P78356	37572.5	0.00783938	0
P16422	37535.6	0.00783168	0
P33527	37452.9	0.00781443	P33527
P52630	36965.6	0.00771277	0
P14209	36957.6	0.00771108	P14209
O94804	36875.9	0.00769404	0
Q9NV70	36726.1	0.0076628	0
Q99828	36355.4	0.00758544	0
P48730	36346.3	0.00758355	0
P04049	35757.3	0.00746065	0
Q9H9B1	35605.2	0.00742892	0
Q9H4L5	35324.7	0.0073704	0
Q8NCG7	35037.7	0.00731052	Q8NCG7
P25445	34572.6	0.00721348	P25445
Q9NZN3	34479.8	0.00719411	Q9NZN3
Q96JB2	34157.4	0.00712684	0
Q9GZM5	34049.5	0.00710432	0
O95999	33962.7	0.00708621	0
Q5BJF2	33830.4	0.00705861	0
P61225	33817.9	0.007056	P61225
P04920	33514.9	0.00699278	0
Q02487	33264.2	0.00694047	Q02487
P01111	32805.6	0.00684479	P01111
P15151	32678.8	0.00681832	P15151
E7ENY0	32504.2	0.0067819	0
A2A3N8	32504.2	0.0067819	0
E7EV99	32504.2	0.0067819	0
P35611	32504.2	0.0067819	0
Q9Y6M7	32476.3	0.00677608	Q9Y6M7
Q15390	32425.1	0.0067654	0
P60484	32268.5	0.00673273	0
Q9UHD9	32146.6	0.0067073	Q9UHD9
P08581	31942.7	0.00666474	P08581
Q86W92	31926	0.00666127	0
Q12959	31724.5	0.00661922	0
P25098	31541.5	0.00658104	0
Q99549	31422	0.00655611	0
O95166	31272.6	0.00652493	0
Q9UIQ6	31039.5	0.0064763	Q9UIQ6
Q96D71	30964.4	0.00646063	0
Q9NSC5	30622.6	0.0063893	0
E9PNJ4	30561.9	0.00637666	0
Q8NE01	30535.6	0.00637116	Q8NE01
P22681	30422.7	0.0063476	0
O43493	30049.8	0.00626979	O43493
Q9Y6K5	29807.7	0.00621929	0
P18827	29697.8	0.00619635	0
Q99755	29548.1	0.00616513	0
Q0JRZ9	29446.9	0.00614401	0
P56945	29285.5	0.00611034	0
Q03518	29208.7	0.00609431	Q03518
Q6RW13	28815.7	0.0060123	0
B7Z4N7	28117.5	0.00586664	0
Q03135	28069.7	0.00585667	Q03135
P06756	27970.4	0.00583593	P06756
P11234	27800.5	0.00580048	P11234
O15162	27686	0.00577659	0
P17252	27673.1	0.00577391	0
Q86UR5	27482	0.00573403	0
O75128	27475	0.00573257	0
Q9BSR8	27430.4	0.00572327	Q9BSR8
Q9NRZ7	27408	0.0057186	0
P25963	27404.6	0.00571788	0
G3V3I4	27404.6	0.00571788	0
Q9Y487	27099.6	0.00565425	0
Q8IWB1	27009.7	0.00563549	Q8IWB1
Q9H3Q1	26883.3	0.00560913	0
B3KUS7	26883.3	0.00560913	0
Q9NW15	26838	0.00559967	0
Q96GD0	26801.9	0.00559213	0
Q9BZQ8	26780	0.00558757	0
Q8TCG1	26652.3	0.00556092	0
Q01831	26575.1	0.00554481	0
Q9NNW5	26349	0.00549764	0
E9PDU5	26349	0.00549764	0
Q93100	26309.2	0.00548934	0
P01137	26286.7	0.00548464	0
P31749	26276.5	0.00548251	0
Q05655	26182.7	0.00546293	0
Q9H490	26023.7	0.00542976	Q9H490
Q8IYI6	25884.9	0.0054008	Q8IYI6
O95164	25785.6	0.00538009	0
O60437	25500.8	0.00532066	0
Q01968	25299.4	0.00527865	0
P09211	25122.1	0.00524164	P09211
A8MX94	25122.1	0.00524164	A8MX94
P32004	24917.1	0.00519887	P32004
Q5H943	24848.8	0.00518462	0
Q15818	24754.2	0.0051649	0
O15530	24664.6	0.00514619	0
E9PER6	24664.6	0.00514619	0
P52799	24655.4	0.00514427	P52799
O00443	24440.6	0.00509945	0
B7ZBC9	24440.5	0.00509943	0
O75449	24440.5	0.00509943	0
B7ZBC8	24440.5	0.00509943	0
P49757	24340.9	0.00507866	0
Q96RT1	24249.8	0.00505964	0
Q96J02	24236.9	0.00505696	0
Q96RU3	24205.8	0.00505046	0
Q13322	24164.4	0.00504183	0
O75554	24111.6	0.00503081	0
P53365	24002.9	0.00500814	P53365
Q9NQ92	23901.4	0.00498695	0
H9KV77	23901.4	0.00498695	0
Q9UEY8	23854.7	0.0049772	0
Q9H3Z4	23561.2	0.00491596	0
E9PRM7	23306.8	0.00486288	0
Q96BI1	23306.8	0.00486288	0
P17612	23100.6	0.00481987	0
Q96SB3	23046	0.00480848	0
Q96CN9	22919.1	0.004782	0
P06702	22919	0.00478198	P06702
Q13107	22809.4	0.00475911	0
Q9HD47	22775.1	0.00475196	0
Q13557	22520	0.00469873	0
Q13444	22188.4	0.00462955	0
O60669	22179.8	0.00462774	O60669
Q9Y5Y0	22144.9	0.00462046	0
P05107	21825.3	0.00455379	0
Q9UBT7	21785.3	0.00454543	0
C9JBU8	21695.1	0.00452661	0
O14713	21695.1	0.00452661	0
Q13433	21613.9	0.00450967	Q13433
A2TJX0	21483.5	0.00448246	0
Q13887	21483.5	0.00448246	0
Q14118	21340.7	0.00445267	Q14118
Q8TCZ2	21285.8	0.00444122	Q8TCZ2
P36897	21279.2	0.00443984	0
P31431	21230.5	0.00442969	0
Q03519	21208.3	0.00442504	Q03519
Q8IWL3	21118.8	0.00440638	Q8IWL3
Q8TCT8	21111.7	0.0044049	0
Q96IF1	21090.1	0.00440039	0
F5H1D6	21051	0.00439222	0
Q07864	21051	0.00439222	0
P46020	21035.3	0.00438894	0
P23634	20711.2	0.00432133	P23634
B5MDZ7	20703.8	0.00431979	0
Q86WJ1	20703.8	0.00431979	0
O43164	20695	0.00431794	0
Q9Y5S2	20479.8	0.00427306	0
P48426	20107.3	0.00419532	0
Q86YR5	19970.8	0.00416685	0
A8MQ02	19952.9	0.00416311	0
P55196	19952.9	0.00416311	0
P50851	19774.1	0.0041258	0
Q96NY7	19768.2	0.00412458	0
Q9HB19	19507.7	0.00407022	0
Q9Y287	19197.5	0.00400551	0
P06241	19188	0.00400352	P06241
O14936	19070.4	0.00397897	0
Q8NCN4	19036.3	0.00397186	0
Q9UDY8	18998.7	0.00396401	0
O00468	18957	0.00395532	0
P55011	18889.2	0.00394117	P55011
Q8IVF2	18660	0.00389335	Q8IVF2
Q13496	18504.3	0.00386086	0
E9PD98	18410.5	0.0038413	0
Q15811	18410.5	0.0038413	0
O43572	17986.3	0.0037528	0
P31321	17926.4	0.00374029	0
Q8IY95	17904	0.0037356	0
P43353	17701.1	0.00369329	0
O14641	17699.5	0.00369295	0
Q9Y6N7	17641.9	0.00368092	Q9Y6N7
Q99541	17555.8	0.00366297	Q99541
Q92930	17544.5	0.0036606	Q92930
P56937	17466.1	0.00364426	0
Q5TA50	17417.1	0.00363403	0
E9PEW5	17392.7	0.00362893	0
Q9HD67	17392.7	0.00362893	0
E7EPL7	17392.7	0.00362893	0
Q658P3	17308	0.00361126	Q658P3
O00522	17159.2	0.00358021	0
B4DNU6	17104.5	0.0035688	B4DNU6
Q9NZN4	17104.5	0.0035688	Q9NZN4
Q96QE2	16996.5	0.00354626	0
P11274	16940.7	0.00353462	0
P27448	16890	0.00352404	0
Q8WXU2	16886.5	0.00352331	0
Q92547	16883.6	0.00352272	0
Q8NB49	16585.8	0.00346057	0
Q06481	16508.4	0.00344443	Q06481
Q15361	16508.3	0.0034444	0
Q9HDC5	16306.9	0.00340239	0
Q9BXL6	16192.2	0.00337845	0
O14807	16173.3	0.00337452	0
P21980	16092.9	0.00335774	0
H3BNC0	16071.8	0.00335334	0
Q9NVM4	16071.8	0.00335334	0
Q13415	16050.9	0.00334897	0
Q86YT6	16015.3	0.00334154	0
Q9BYI3	15898.7	0.00331721	0
Q9UI14	15878.2	0.00331294	Q9UI14
Q8WUX1	15833.5	0.00330361	Q8WUX1
Q96RD7	15830.9	0.00330307	0
Q3V6T2	15716.3	0.00327917	0
B7Z3D5	15705.9	0.00327699	0
Q13613	15705.9	0.00327699	0
Q92963	15622.4	0.00325956	0
Q8TAG9	15447.3	0.00322303	0
Q7Z2K8	15427.1	0.00321882	0
Q7Z2W4	15383.2	0.00320965	0
P43355	15374.1	0.00320777	0
Q8WXG6	15235.7	0.00317888	0
Q9UPY5	15018.3	0.00313352	Q9UPY5
Q9H7L9	15018.3	0.00313352	0
Q13488	14981.2	0.00312579	0
Q9BPZ7	14932.9	0.0031157	0
Q9H063	14919.4	0.00311289	0
P52429	14893.9	0.00310756	0
P08069	14809.5	0.00308995	P08069
Q6UWU4	14790.1	0.00308591	0
Q9BQE4	14739.1	0.00307527	0
Q04721	14611.4	0.00304863	Q04721
A4D1S5	14448	0.00301452	0
P29317	14332.7	0.00299047	P29317
Q8N3E9	14279.8	0.00297944	0
O15439	14246.8	0.00297254	O15439
P49281	14213.9	0.00296569	0
O00141	14146.3	0.00295158	0
Q13421	14053.1	0.00293214	Q13421
Q13033	13924.1	0.00290522	0
E9PQM8	13418.9	0.00279981	0
E9PRF4	13418.9	0.00279981	0
Q15047	13418.9	0.00279981	0
P46939	13311	0.00277731	0
P41440	13231.5	0.00276072	0
P46019	12985.4	0.00270937	0
Q9HBI1	12974.5	0.0027071	0
Q9H4G0	12893.2	0.00269013	0
O15440	12856.2	0.00268241	O15440
Q99836	12777	0.00266589	0
H0Y4G9	12777	0.00266589	0
Q9Y289	12664.9	0.00264249	0
Q13464	12604	0.00262978	0
Q96QC4	12569.2	0.00262252	Q96QC4
Q8N3R9	12491.3	0.00260627	0
Q4KMQ2	12429.2	0.00259331	Q4KMQ2
Q8IZ07	12397.7	0.00258675	0
P40123	12339.6	0.00257461	P40123
Q96BD0	12258.5	0.0025577	0
Q96AE7	12245.6	0.00255501	0
Q9BUZ4	12130.9	0.00253107	0
Q9BZF3	12071.4	0.00251866	0
O14795	12061.7	0.00251663	0
Q9C0B5	12046.3	0.00251342	Q9C0B5
Q9UBF8	11957.9	0.00249498	0
P35222	11939.8	0.0024912	P35222
B4DGU4	11939.8	0.0024912	B4DGU4
Q9GZT4	11911.8	0.00248535	0
P49795	11856.2	0.00247375	0
P35580	11836.6	0.00246966	0
Q6EMK4	11822.4	0.00246672	Q6EMK4
Q5T9L3	11807.1	0.00246351	Q5T9L3
Q5VZ89	11758.4	0.00245336	0
Q8IWV8	11726.8	0.00244677	0
Q86YS7	11714.7	0.00244424	0
Q9Y6D0	11516.9	0.00240297	0
Q30201	11473.5	0.00239391	Q30201
O95429	11461.6	0.00239143	0
P35240	11457	0.00239046	P35240
A1KXE4	11419.8	0.00238271	0
P50148	11386.9	0.00237585	P50148
Q8NI35	11382.8	0.00237498	0
O00180	11344.5	0.00236701	0
Q9BXS4	11317.2	0.00236131	0
E7EUL7	11166.5	0.00232985	0
E7END2	11166.5	0.00232985	0
E9PHV5	11166.5	0.00232985	0
P28290	11166.5	0.00232985	0
Q8TEW0	11054.7	0.00230653	0
Q96GC9	10957.3	0.00228621	Q96GC9
O95436	10898.6	0.00227396	0
Q9Y4K3	10818.3	0.0022572	0
Q6UW56	10779.5	0.00224911	0
P43007	10739.3	0.00224073	P43007
P63027	10649.9	0.00222207	P63027
Q99808	10619.5	0.00221573	Q99808
Q9H1K0	10304.4	0.00214998	0
O43688	10289.6	0.00214689	O43688
A6NDA1	10137.3	0.00211512	0
Q99871	10137.3	0.00211512	0
Q8NFT8	10135.3	0.0021147	0
Q9UHW9	10111	0.00210963	Q9UHW9
Q9BZL6	10063.3	0.00209969	0
Q15256	10057.7	0.00209851	0
P42356	10050	0.00209691	0
Q96QU8	9999.33	0.00208633	Q96QU8
D3DWF9	9999.33	0.00208633	D3DWF9
Q15438	9995.9	0.00208561	0
Q9ULD2	9979.06	0.0020821	0
D4PHA4	9821.87	0.0020493	0
F5GY92	9821.87	0.0020493	0
Q86WP2	9821.87	0.0020493	0
O14763	9729.76	0.00203008	O14763
Q99519	9664.73	0.00201652	0
Q9NS93	9545.86	0.00199171	0
Q12913	9400.99	0.00196149	Q12913
Q9BYG5	9229.07	0.00192562	0
C9J813	9220.61	0.00192385	0
E9PGZ1	9220.61	0.00192385	0
F5H1Z9	9220.61	0.00192385	0
Q05682	9220.61	0.00192385	0
P51617	9159.39	0.00191108	0
Q14680	9135.16	0.00190602	0
Q86X27	8869.61	0.00185062	0
H0Y2Z9	8842.07	0.00184487	0
F5H3L5	8842.07	0.00184487	0
Q08174	8842.07	0.00184487	Q08174
P50748	8830.8	0.00184252	0
E7ES84	8830.8	0.00184252	0
Q9Y4H2	8737.67	0.00182309	0
Q9H6B4	8668.1	0.00180857	Q9H6B4
Q5Y8C7	8656.83	0.00180622	0
O00559	8656.83	0.00180622	0
E9PND3	8656.83	0.00180622	0
E9PN10	8656.83	0.00180622	0
P04114	8645.89	0.00180394	0
Q5HYK7	8283.59	0.00172835	0
Q13286	8279.7	0.00172753	0
P21589	8195.12	0.00170989	P21589
Q86T24	8188.51	0.00170851	0
O15068	8165.38	0.00170368	0
Q01974	8149.95	0.00170046	Q01974
Q7Z2H8	8147.36	0.00169992	0
E5RHG5	8147.36	0.00169992	0
P17301	8143.94	0.00169921	P17301
O43318	8001.48	0.00166948	0
Q9P0L2	7954.18	0.00165961	0
P13929	7935.5	0.00165572	P13929
O60503	7894.66	0.0016472	0
Q14114	7894.05	0.00164707	Q14114
Q2PPJ7	7827.85	0.00163326	Q2PPJ7
Q8TEL6	7782.91	0.00162388	0
Q14156	7773.3	0.00162187	0
P32019	7741.3	0.0016152	0
O14492	7693.26	0.00160517	0
P11169	7659.17	0.00159806	P11169
P78536	7617.88	0.00158945	0
Q07889	7564.62	0.00157834	0
Q92796	7562.78	0.00157795	0
Q96AD5	7542.15	0.00157365	0
Q7L804	7538.63	0.00157291	0
Q8IWY9	7536.2	0.0015724	0
Q9H8T0	7443.68	0.0015531	0
Q9BT40	7402.69	0.00154455	0
P10636	7310.44	0.0015253	0
P58335	7307.69	0.00152473	0
Q92851	7292.83	0.00152163	0
E9PM17	7258.96	0.00151456	0
Q13153	7258.96	0.00151456	0
Q7Z3B1	7243.44	0.00151132	Q7Z3B1
Q8N440	7243.44	0.00151132	0
O15431	7170.73	0.00149615	0
Q9NVN3	7135.26	0.00148875	0
P16144	6921.34	0.00144412	P16144
P23229	6880.22	0.00143554	P23229
F6XZ68	6785.43	0.00141576	0
O75689	6785.43	0.00141576	0
H7C2Q4	6785.43	0.00141576	0
Q9UGH3	6707.05	0.00139941	0
Q9NS23	6594.81	0.00137599	0
O14939	6519.87	0.00136035	0
Q70E73	6391.83	0.00133364	0
O15294	6276.46	0.00130956	0
Q8NFG4	6241.6	0.00130229	0
Q92581	6197.67	0.00129313	0
Q9UBH6	6155.06	0.00128424	0
E7EMP0	6152.65	0.00128373	0
E9PFZ0	6152.65	0.00128373	0
E9PFC7	6152.65	0.00128373	0
P38398	6152.65	0.00128373	0
Q6P4Q7	6150.57	0.0012833	0
P29474	6139.35	0.00128096	0
P51157	6045.43	0.00126136	0
P42336	5981.77	0.00124808	P42336
Q13574	5981.03	0.00124792	0
Q16181	5869.81	0.00122472	Q16181
Q8NFJ5	5806.23	0.00121145	0
Q13530	5716.2	0.00119267	0
B4DUE9	5716.2	0.00119267	0
O60487	5682.17	0.00118557	0
O14786	5644.31	0.00117767	O14786
Q8TCT7	5640.46	0.00117687	0
P51636	5592.94	0.00116695	0
Q7Z7A4	5534.42	0.00115474	0
Q9HB21	5504	0.00114839	0
P49917	5456.85	0.00113855	0
Q14289	5423.13	0.00113152	0
Q86VZ5	5418.6	0.00113057	0
Q969K3	5363.62	0.0011191	0
P10646	5352.99	0.00111688	0
Q9Y666	5347.86	0.00111581	0
P98160	5322.25	0.00111047	P98160
P16298	5204.67	0.00108594	P16298
Q14005	5111.49	0.0010665	0
Q99569	5016.35	0.00104665	0
P15056	4992.95	0.00104176	0
E9PNH7	4913.83	0.00102526	0
E9PJL7	4913.83	0.00102526	0
E9PR44	4913.83	0.00102526	0
P02511	4913.83	0.00102526	0
P18510	4891.73	0.00102064	0
P31146	4831.39	0.00100805	0
P31641	4818.73	0.00100541	P31641
Q5EBL4	4764.19	0.000994034	0
P45844	4710.23	0.000982776	0
Q86YD1	4683.02	0.000977098	0
Q14571	4645.4	0.000969249	0
Q14315	4569.66	0.000953447	Q14315
Q86WV6	4527.79	0.000944709	0
Q9BXP2	4401.25	0.000918307	0
O15287	4371.58	0.000912117	0
Q01151	4357.71	0.000909223	0
Q99962	4332.83	0.000904031	0
Q8NCM8	4321.49	0.000901666	Q8NCM8
O00212	4304.16	0.00089805	0
P08648	4303.21	0.000897852	P08648
Q14542	4253.93	0.00088757	0
Q86Y91	4242.68	0.000885221	0
Q9H2J7	4227.77	0.000882112	0
P62987	4218.24	0.000880122	0
A8MWK3	4188.42	0.000873901	A8MWK3
P19022	4188.42	0.000873901	P19022
E7ES96	4131.55	0.000862036	0
P43003	4091.55	0.00085369	0
Q9C086	4089.28	0.000853215	0
Q14517	4079.63	0.000851203	0
O60906	4077.89	0.00085084	0
B4DFF2	4045.1	0.000843997	0
Q9NRA2	4045.1	0.000843997	0
Q9NZV1	4040.22	0.000842979	Q9NZV1
Q92692	4016.58	0.000838047	Q92692
Q96J84	3999.8	0.000834547	Q96J84
Q14802	3974.35	0.000829235	0
Q9NZC7	3971.01	0.000828539	0
Q8TCU6	3969.99	0.000828326	0
C9JN77	3967.59	0.000827825	0
C9J4Z9	3967.59	0.000827825	0
C9JZ60	3967.59	0.000827825	0
C9J372	3967.59	0.000827825	0
Q08357	3891.43	0.000811934	0
Q14512	3866.1	0.000806651	Q14512
Q6UUV9	3860.94	0.000805573	0
Q8IXQ5	3859.12	0.000805195	0
C4B7M2	3834.57	0.000800072	0
Q96JI7	3834.57	0.000800072	0
Q96I34	3807.39	0.000794401	0
Q05513	3801.22	0.000793114	0
Q9NYA1	3780.97	0.000788887	0
Q8WUD1	3765.81	0.000785724	Q8WUD1
Q8ND76	3758.92	0.000784287	0
O75386	3748.47	0.000782106	0
F8WBZ9	3748.47	0.000782106	0
Q9P246	3696.94	0.000771356	0
H0Y860	3696.94	0.000771356	0
O75575	3661.26	0.00076391	0
P08842	3643.49	0.000760203	0
Q96RU7	3618.71	0.000755032	0
O43150	3601.92	0.000751531	0
P01008	3546.31	0.000739926	0
F5GX05	3545.98	0.000739859	0
Q9Y2J2	3545.98	0.000739859	0
P51511	3509.36	0.000732218	P51511
P18084	3507.03	0.00073173	P18084
P61018	3476.26	0.000725311	0
P19021	3452.38	0.000720328	0
C9J798	3434.05	0.000716503	0
P84022	3425.21	0.000714661	0
O60353	3423.63	0.000714329	0
P48067	3366.05	0.000702317	P48067
Q86XP1	3308.49	0.000690307	0
O94907	3308.18	0.000690241	0
P19438	3296.48	0.0006878	0
O60237	3289.41	0.000686325	0
F8W8M3	3289.41	0.000686325	0
Q92536	3251.08	0.000678329	Q92536
Q9HAU4	3201.71	0.000668028	0
Q9UHX3	3175.05	0.000662464	0
Q96KQ4	3164.02	0.000660163	0
O14613	3145.88	0.000656379	0
Q8TAA9	3144.14	0.000656016	0
P78410	3063.62	0.000639216	P78410
Q9BXS0	3016.81	0.000629449	0
O60779	3006.47	0.000627291	0
A1A4S6	2983.1	0.000622414	0
Q03405	2970.17	0.000619718	Q03405
P19440	2953.36	0.000616211	P19440
P25054	2940.22	0.000613468	0
P16885	2922.68	0.000609808	0
Q9NR96	2912.16	0.000607613	0
P21583	2903.8	0.00060587	0
P26006	2894.88	0.000604007	P26006
Q8IY33	2884.29	0.000601798	0
Q9HCJ1	2871.57	0.000599145	Q9HCJ1
Q5TZA2	2855.91	0.000595876	0
Q9BY67	2855.66	0.000595824	Q9BY67
P01024	2852.16	0.000595095	P01024
P18433	2850.36	0.000594719	0
Q99719	2847.05	0.000594028	0
Q9HCM4	2803.55	0.000584951	0
P56199	2792.97	0.000582744	P56199
P60763	2775.97	0.000579198	P60763
O14493	2745.94	0.000572932	O14493
P05187	2708.32	0.000565082	P05187
Q96HG1	2701.77	0.000563716	0
P41273	2696.74	0.000562667	P41273
P50443	2689.96	0.000561252	0
Q96A54	2664.27	0.000555892	0
Q86X29	2657.57	0.000554493	Q86X29
Q9H3T3	2652.75	0.000553488	0
Q99523	2633.35	0.000549441	0
Q04656	2611.81	0.000544946	0
P13761	2600.24	0.000542531	0
P79483	2600.24	0.000542531	0
Q9TQE0	2600.24	0.000542531	Q9TQE0
O43566	2596.32	0.000541713	0
Q9Y5J5	2585.16	0.000539385	0
Q969P0	2545.36	0.000531083	Q969P0
Q9NQX7	2539.25	0.000529806	0
B4E127	2497.46	0.000521088	0
F5H0I7	2497.46	0.000521088	0
G8JL98	2497.46	0.000521088	0
Q13569	2497.46	0.000521088	0
Q9C0K1	2497.4	0.000521075	0
P13928	2487.02	0.000518908	0
Q9UQ49	2472.09	0.000515795	0
P12830	2447.58	0.000510681	0
Q9UII8	2447.58	0.000510681	0
Q8N9M5	2391.39	0.000498955	0
Q8NHU3	2382.69	0.000497141	0
P24588	2369.24	0.000494335	0
O75144	2356.23	0.00049162	0
Q00973	2347.86	0.000489873	0
P09326	2346.9	0.000489674	0
O75204	2319.11	0.000483874	0
Q6PJF5	2297.42	0.00047935	0
Q8WUM9	2296.97	0.000479255	0
Q7Z698	2281.48	0.000476025	Q7Z698
C9J623	2281.48	0.000476025	C9J623
Q5XXA6	2248.76	0.000469197	0
P02686	2241.58	0.000467699	0
O14494	2216.97	0.000462565	0
Q9NY26	2216.88	0.000462545	Q9NY26
Q96ST8	2172.05	0.000453191	0
Q6IE81	2145.85	0.000447724	0
P30487	2090.84	0.000436248	0
P30483	2090.84	0.000436248	0
P30488	2090.84	0.000436248	0
Q8TDM6	2055.05	0.00042878	0
Q15800	2053.86	0.000428531	Q15800
Q9C0H2	2053.06	0.000428365	0
P02679	2045.02	0.000426688	0
P13796	2044.62	0.000426603	0
O14775	2044	0.000426474	0
Q9Y6X8	2019.26	0.000421311	0
Q14088	1999.18	0.000417123	0
Q9Y2I1	1988.8	0.000414958	0
Q96DA2	1961.63	0.000409289	0
P13866	1910.45	0.00039861	0
P27487	1901.79	0.000396802	0
Q9Y4K4	1877.99	0.000391836	0
P02760	1868.83	0.000389926	0
P54826	1854.47	0.00038693	P54826
Q9UN19	1848.95	0.000385777	0
P15509	1844.9	0.000384933	0
P09936	1835.93	0.000383061	0
O14735	1834.58	0.000382779	O14735
P48060	1831.37	0.00038211	P48060
Q08AE8	1830.42	0.000381912	0
Q9Y5Z7	1794.45	0.000374406	0
P42338	1787.15	0.000372883	0
E9PFQ4	1785.29	0.000372495	0
Q86SQ0	1785.29	0.000372495	0
O43653	1782.19	0.000371848	0
P53794	1782.09	0.000371827	0
Q9BSF0	1774.34	0.000370211	0
Q9UMD9	1771.49	0.000369615	0
Q16625	1755.92	0.000366367	0
O43822	1744.55	0.000363994	0
Q9Y2I9	1728.1	0.000360562	0
Q92859	1722.4	0.000359373	Q92859
O15231	1719.2	0.000358705	0
Q9UQC2	1707.2	0.000356201	0
P05120	1706.71	0.000356099	0
Q8TBR7	1677.18	0.000349938	0
Q01484	1662.18	0.00034681	Q01484
P04156	1637.36	0.000341631	P04156
P61073	1611.93	0.000336325	0
Q9H228	1599.55	0.00033374	0
Q6UXD5	1596.91	0.000333191	0
C9JCN0	1593.42	0.000332462	C9JCN0
I3L3X1	1591.74	0.000332111	0
I3L3M4	1591.74	0.000332111	0
F5H496	1591.74	0.000332111	0
Q9NP84	1578.08	0.000329262	0
Q5SZK8	1561.83	0.000325871	0
Q9Y4D7	1539.48	0.000321208	Q9Y4D7
Q13938	1512.77	0.000315635	0
P27701	1468.14	0.000306324	0
P05186	1453.11	0.000303186	P05186
Q96NL8	1447.14	0.000301942	0
Q96QT4	1446.03	0.000301709	0
P30550	1439.95	0.000300441	0
Q5W0Z9	1416.94	0.00029564	0
P04233	1414.85	0.000295205	0
Q5VV43	1403.16	0.000292766	0
P63146	1402.52	0.000292632	0
Q86SJ2	1369.78	0.0002858	0
Q5JTC6	1350.31	0.000281738	0
O94768	1344.85	0.000280599	0
P35568	1329.48	0.000277391	0
Q9H0M0	1312.96	0.000273945	0
Q8WZ73	1270.27	0.000265038	0
P25942	1250.08	0.000260825	0
P40189	1244.58	0.000259677	P40189
Q8NBP5	1242.55	0.000259255	0
Q6P0Q8	1235.25	0.000257731	0
P51788	1233.52	0.00025737	0
Q16760	1231.77	0.000257005	0
Q13191	1227.41	0.000256095	0
P15260	1225.59	0.000255716	P15260
Q9Y2G3	1220.94	0.000254745	0
P12931	1220.08	0.000254565	0
P41220	1218.74	0.000254286	0
P05121	1199.07	0.000250182	P05121
A6PW57	1183.69	0.000246974	0
F8VQZ7	1176.08	0.000245386	0
G3XA91	1176.08	0.000245386	0
P01909	1144.18	0.000238729	0
P08183	1143.95	0.000238682	0
P98164	1136.9	0.00023721	0
Q9Y4E1	1135.1	0.000236836	0
P19634	1097.87	0.000229067	0
B4DTZ6	1097.87	0.000229067	0
P46531	1089.72	0.000227368	0
Q96C24	1084	0.000226172	0
Q9H1J1	1083.91	0.000226154	0
O00750	1076.27	0.00022456	0
Q9ULV1	1067.55	0.000222741	0
P59768	1067.16	0.00022266	0
Q6UB99	1064.41	0.000222086	0
O75751	1049.8	0.000219037	0
C9J5M4	1033.41	0.000215617	0
B8ZZF5	1033.41	0.000215617	B8ZZF5
Q9H8M9	1033.41	0.000215617	0
O43739	1032.58	0.000215445	0
Q6PCB7	1017.87	0.000212375	0
P34741	967.019	0.000201765	0
O60291	961.647	0.000200645	0
Q5T2W1	960.293	0.000200362	0
Q8IUQ4	952.712	0.000198781	0
P31323	952.232	0.00019868	0
Q9NWQ8	932.66	0.000194597	0
Q16236	924.213	0.000192834	0
Q96S97	921.952	0.000192362	Q96S97
Q9H159	921.902	0.000192352	0
P06213	921.806	0.000192332	P06213
O60462	913.873	0.000190677	0
Q9NPH3	898.7	0.000187511	Q9NPH3
Q96Q06	896.955	0.000187147	0
Q9NRD5	895.476	0.000186838	0
Q8IWA5	883.288	0.000184295	Q8IWA5
Q9BZF2	883.18	0.000184273	0
P11532	867.906	0.000181086	0
B4E096	863.977	0.000180266	0
P08138	863.977	0.000180266	0
B0I1T2	863.073	0.000180078	0
Q15464	858.771	0.00017918	0
Q6J4K2	851.875	0.000177741	0
P05109	848.821	0.000177104	P05109
P49961	848.093	0.000176952	0
Q68D85	838.542	0.000174959	Q68D85
P62491	835.437	0.000174311	P62491
B4DTR1	834.571	0.000174131	B4DTR1
P04626	834.571	0.000174131	P04626
Q12923	831.881	0.000173569	0
Q9Y4D1	828.599	0.000172885	0
Q9H2G4	826.869	0.000172524	0
P13726	826.716	0.000172492	P13726
O43187	825.142	0.000172163	0
Q8WWL2	815.134	0.000170075	0
Q5VWQ8	815.112	0.000170071	0
Q86WH2	813.007	0.000169631	0
O95183	808.793	0.000168752	0
P15153	801.706	0.000167274	P15153
Q14761	797.902	0.00016648	0
Q92508	784.415	0.000163666	0
Q96NY8	764.138	0.000159435	0
Q9BT92	758.131	0.000158182	0
O00408	757.299	0.000158008	O00408
O95342	755.207	0.000157572	0
O60551	754.793	0.000157485	0
Q5VUC6	754.793	0.000157485	0
F5H594	754.793	0.000157485	0
Q9Y4G8	753.085	0.000157129	Q9Y4G8
O76081	737.791	0.000153938	0
Q5H9F3	732.296	0.000152791	0
Q7RTP0	728.237	0.000151944	0
Q15077	725.524	0.000151378	0
Q92556	725.26	0.000151323	0
O60711	723.952	0.00015105	0
O75781	721.663	0.000150573	0
Q9GZU1	720.129	0.000150253	0
Q06187	718.624	0.000149939	0
F5H001	717.608	0.000149727	0
F5H7N8	717.608	0.000149727	0
P78380	717.608	0.000149727	P78380
F5GZH1	717.608	0.000149727	0
Q9Y5V3	713.973	0.000148968	0
Q15139	707.564	0.000147631	0
F8WBA3	707.564	0.000147631	0
P16671	705.679	0.000147238	0
Q9BZM4	703.015	0.000146682	Q9BZM4
Q96KN1	698.384	0.000145716	0
Q92629	693.552	0.000144708	0
P0CG04	692.314	0.000144449	0
A0M8Q6	692.314	0.000144449	0
P0CF74	692.314	0.000144449	0
P0CG06	692.314	0.000144449	0
P0CG05	692.314	0.000144449	0
P01903	685.822	0.000143095	P01903
Q8IVJ1	683.619	0.000142635	0
Q96JW4	683.619	0.000142635	0
P78352	667.394	0.00013925	0
P20337	667.05	0.000139178	0
P02675	666.309	0.000139023	0
P17677	663.66	0.000138471	0
Q9NRY6	655.425	0.000136752	0
P50895	655.197	0.000136705	P50895
O75197	647.618	0.000135124	0
P15529	646.516	0.000134894	P15529
P36896	646.212	0.00013483	0
Q07912	646	0.000134786	0
P60033	645.631	0.000134709	0
P55085	626.424	0.000130701	0
Q9UKX5	623.106	0.000130009	Q9UKX5
Q08334	619.26	0.000129207	0
Q9H5V8	611.305	0.000127547	Q9H5V8
P04003	609.413	0.000127152	0
P49006	604.931	0.000126217	P49006
Q53TN4	604.253	0.000126075	Q53TN4
Q16832	603.508	0.00012592	Q16832
Q03113	596.558	0.00012447	Q03113
P20336	590.828	0.000123274	0
Q12866	587.047	0.000122486	0
Q8N8Q9	575.374	0.00012005	0
Q13835	571.067	0.000119151	Q13835
Q9NRX5	570.05	0.000118939	0
Q9NQS3	563.867	0.000117649	0
P56159	559.292	0.000116695	0
Q8WWN8	552.281	0.000115232	0
O76082	549.614	0.000114675	O76082
Q86YJ7	547.94	0.000114326	0
O75084	541.836	0.000113052	0
Q6PFW1	536.531	0.000111945	0
B7Z3Z9	532.586	0.000111122	B7Z3Z9
P33121	532.586	0.000111122	P33121
P06734	528.97	0.000110368	0
Q6PJW8	522.552	0.000109029	0
O75354	510.437	0.000106501	0
Q9Y572	508.18	0.00010603	0
P55899	506.374	0.000105653	0
P22223	499.619	0.000104244	0
Q8IWU5	499.569	0.000104234	0
Q16651	495.123	0.000103306	0
P54710	489.417	0.000102115	0
P35612	473.824	9.88619e-05	0
Q14699	468.392	9.77285e-05	0
P08575	460.55	9.60924e-05	0
Q14451	459.547	9.58831e-05	0
P35367	456.974	9.53462e-05	0
P32926	453.683	9.46596e-05	0
Q9BXJ7	451.348	9.41723e-05	0
Q8WYL5	451.21	9.41435e-05	0
Q6DU44	450.97	9.40935e-05	0
P13747	450.97	9.40935e-05	0
P27986	448.077	9.34898e-05	0
Q92887	437.332	9.12479e-05	0
P32942	434.717	9.07024e-05	0
O15438	431.444	9.00194e-05	0
P05534	431.343	8.99984e-05	0
P55290	430.255	8.97714e-05	P55290
Q969H4	424.751	8.86231e-05	0
P42680	424.129	8.84933e-05	0
P60880	422.248	8.81008e-05	0
P16157	421.732	8.79931e-05	0
P23508	421.599	8.79654e-05	0
C9JX92	410.296	8.5607e-05	0
O95622	408.263	8.51829e-05	0
C9JRT8	408.263	8.51829e-05	0
C9JQ38	408.263	8.51829e-05	0
O43306	408.263	8.51829e-05	0
Q9UP95	407.749	8.50756e-05	0
P16444	407.615	8.50477e-05	0
Q8N370	401.764	8.38267e-05	0
Q9HBM0	397.328	8.29012e-05	0
O75387	395.291	8.24762e-05	0
Q63HR2	385.983	8.05341e-05	0
Q9Y5Y6	384.733	8.02734e-05	0
Q14574	381.778	7.96569e-05	0
Q687X5	372.168	7.76516e-05	0
Q8IZD2	368.999	7.69905e-05	0
Q9UQ52	368.792	7.69474e-05	0
Q5SR56	366.665	7.65035e-05	0
P46821	366.022	7.63694e-05	0
Q8IUW5	360.928	7.53064e-05	Q8IUW5
P00734	357.353	7.45607e-05	0
Q9H190	357.14	7.45162e-05	0
P18564	356.736	7.44319e-05	0
O00481	355.576	7.41899e-05	O00481
Q9HCG7	354.883	7.40453e-05	0
B4DFN3	354.078	7.38773e-05	0
Q13563	354.078	7.38773e-05	0
P10721	345.255	7.20365e-05	0
P27816	337.895	7.05007e-05	P27816
P50281	329.248	6.86967e-05	P50281
P33241	327.239	6.82775e-05	0
P43405	324.899	6.77891e-05	0
P23743	324.858	6.77806e-05	0
Q14332	322.827	6.73569e-05	0
P02647	320.061	6.67798e-05	0
O43490	318.102	6.6371e-05	0
Q9Y3S1	315.149	6.57548e-05	0
Q8NFY4	314.899	6.57027e-05	0
Q9Y6I3	314.673	6.56555e-05	0
O95477	311.454	6.4984e-05	0
Q96NE9	304.906	6.36178e-05	Q96NE9
P08473	304.283	6.34876e-05	0
O94898	293.957	6.13332e-05	0
Q14213	292.664	6.10634e-05	0
Q9UKT9	292.227	6.09722e-05	0
Q5S007	287.791	6.00467e-05	0
O94813	287.26	5.9936e-05	0
O75581	284.653	5.93919e-05	O75581
P98155	273.006	5.69619e-05	0
E9PAZ1	272.183	5.67901e-05	0
F8W826	272.183	5.67901e-05	0
Q9NSB8	272.183	5.67901e-05	0
Q9UQB8	271.607	5.667e-05	0
Q7KZI7	266.964	5.57013e-05	0
P49810	264.662	5.52209e-05	P49810
Q9H4E7	260.821	5.44195e-05	0
P51178	260.054	5.42595e-05	0
Q8WXI7	255.706	5.33523e-05	0
Q9HCH5	255.133	5.32328e-05	0
P02649	254.804	5.31641e-05	0
P78395	251.565	5.24882e-05	0
P48029	250.78	5.23244e-05	0
E7EN24	248.464	5.18413e-05	0
O75487	246.358	5.14018e-05	0
B4E2C0	246.358	5.14018e-05	0
P13591	245.223	5.11651e-05	0
Q96AP7	244.686	5.10531e-05	0
P51451	242.066	5.05063e-05	0
Q08345	241.425	5.03726e-05	Q08345
Q9HCE9	240.868	5.02564e-05	0
O75923	236.277	4.92985e-05	0
P10321	236.099	4.92613e-05	0
P78324	234.993	4.90306e-05	P78324
Q86SJ6	233.771	4.87756e-05	0
O95267	232.157	4.84388e-05	0
Q9BXL7	231.493	4.83003e-05	0
P56747	225.326	4.70136e-05	0
P25311	224.169	4.67722e-05	0
Q14449	223.183	4.65664e-05	0
Q9UIG8	222.41	4.64053e-05	0
B4DYR1	218.663	4.56234e-05	B4DYR1
P78504	218.663	4.56234e-05	P78504
P54756	218.628	4.56161e-05	P54756
Q99550	217.874	4.54588e-05	0
Q9BQS7	217.44	4.53681e-05	0
P00742	213.864	4.46222e-05	P00742
Q5VY80	211.994	4.42319e-05	Q5VY80
Q6H3X3	211.994	4.42319e-05	Q6H3X3
Q8TF71	211.947	4.42222e-05	0
Q8IZC4	208.408	4.34837e-05	0
P37173	202.263	4.22016e-05	0
Q8N1W1	192.219	4.0106e-05	0
Q6UXM1	191.72	4.00017e-05	0
Q96NT5	190.911	3.9833e-05	0
Q8N5C8	189.909	3.96239e-05	0
Q9NYQ8	183.877	3.83654e-05	0
B1ALU3	183.793	3.83479e-05	0
B1ALU1	183.793	3.83479e-05	0
O95490	183.793	3.83479e-05	0
P28676	178.382	3.72188e-05	0
Q8TD43	177.384	3.70106e-05	0
O43157	174.695	3.64496e-05	0
Q9H3S1	170.822	3.56415e-05	0
P27037	163.295	3.40709e-05	0
P51828	160.611	3.35111e-05	0
P51654	158.481	3.30665e-05	0
O00329	157.941	3.2954e-05	0
Q9UGK3	157.643	3.28918e-05	0
Q9Y6N9	156.066	3.25628e-05	0
P20701	150.895	3.14838e-05	0
P48066	150.875	3.14797e-05	0
E9PDC3	145.591	3.03772e-05	0
C9JJX6	145.591	3.03772e-05	0
O00192	145.591	3.03772e-05	0
P19086	145.535	3.03653e-05	P19086
P32238	140.289	2.92709e-05	0
Q96MC6	140.21	2.92545e-05	0
O60296	137.508	2.86906e-05	0
P15309	136.674	2.85166e-05	0
Q4KMG0	134.789	2.81234e-05	0
Q9Y4J8	133.597	2.78747e-05	0
Q9Y219	132.287	2.76012e-05	0
P08887	131.267	2.73884e-05	0
P98172	130.515	2.72315e-05	P98172
P22413	129.852	2.70932e-05	0
Q9Y6R1	128.926	2.69e-05	0
Q68DA7	128.565	2.68248e-05	0
P49019	126.068	2.63038e-05	0
Q8TDS4	126.068	2.63038e-05	0
Q13469	125.785	2.62448e-05	0
Q8NFP9	121.938	2.5442e-05	Q8NFP9
Q07954	119.088	2.48473e-05	0
P02671	113.708	2.37248e-05	P02671
Q53GL0	110.668	2.30905e-05	0
Q92854	103.945	2.16878e-05	0
O75326	102.736	2.14355e-05	0
Q9NYQ6	89.9993	1.87781e-05	Q9NYQ6
Q8WU20	89.7804	1.87324e-05	0
Q9Y625	89.6686	1.87091e-05	0
G5E9E7	82.9316	1.73034e-05	0
Q8NDX1	80.4561	1.67869e-05	0
P29279	79.3745	1.65612e-05	0
P49796	78.6676	1.64138e-05	0
Q96QZ7	78.5252	1.6384e-05	0
Q12791	78.1304	1.63017e-05	0
Q15223	72.3647	1.50987e-05	0
Q9NR71	70.7614	1.47642e-05	0
H0YAH0	63.2694	1.3201e-05	0
F5GWJ1	63.2694	1.3201e-05	0
O60245	63.2694	1.3201e-05	O60245
A6NDB9	62.1671	1.2971e-05	0
Q86WA9	61.2459	1.27788e-05	0
P04440	59.547	1.24243e-05	0
P15498	58.5319	1.22125e-05	0
Q9BXS9	49.8609	1.04033e-05	0
O43520	36.6809	7.65336e-06	0
Q9NT68	35.2081	7.34606e-06	Q9NT68
P12259	34.5609	7.21104e-06	P12259
O75051	34.4475	7.18736e-06	O75051
O75882	32.8484	6.85372e-06	0
Q5T3U5	30.3917	6.34114e-06	0
Q9UPN3	28.4302	5.93187e-06	0
P21854	23.1558	4.83139e-06	0
P23469	18.41	3.84119e-06	P23469
Q86XX4	13.8385	2.88736e-06	Q86XX4
Q13683	13.6238	2.84256e-06	0
