# Supplementary material for: Clathrin-independent pathways do not contribute significantly to endocytic flux
Source: eLife. 2014 Sep 17;3:e03970. doi: 10.7554/eLife.03970 (PMC4185422; doi:10.7554/eLife.03970)
Supplement: Figure 4—source data 1. — Proteins shaded green were classified as depleted from the the plasma membrane upon AP2 siRNA treatment, those shaded redwe classified as accumulated. DOI: http://dx.doi.org/10.7554/eLife.03970.019 [file elife03970s002.xlsx]

## Sheet: biotinylated proteins
Protein Names	Gene Names	Protein Descriptions	Uniprot	Proteins	Peptides	Unique Peptides	Sequence Coverage [%]	Mol. Weight [kDa]	Sequence Length	PEP	Ratio H/L Normalized	Intensity	Intensity L	Intensity H
Protein S100-A7;Psoriasin;S100 calcium-binding protein A7;Protein S100-A7A;S100 calcium-binding protein A15;S100 calcium-binding protein A7A;S100 calcium-binding protein A7-like 1	PSOR1;S100A7;S100A7C;S100A15;S100A7A;S100A7L1	Protein S100-A7;Protein S100-A7A	P31151;Q86SG5	2	3	3	35.6	11.471	101	1.2428e-38	0.0011381	15757000	15664000	92818			proteins below the lower cut-off
Calgranulin-B;Calprotectin L1H subunit;Leukocyte L1 complex heavy chain;Migration inhibitory factor-related protein 14;Protein S100-A9;S100 calcium-binding protein A9;cDNA, FLJ92148, highly similar to Homo sapiens S100 calcium binding protein A9 (calgranulin B) (S100A9), mRNA	CAGB;CFAG;MRP14;S100A9	Protein S100-A9	P06702;B2R4M6	1	4	4	31.6	13.242	114	1.0081e-18	0.0027662	40006000	38989000	1016800			proteins above the higher cut-off
		RNA-directed DNA polymerase (reverse transcriptase), related domain containing protein		1	1	1	7.6	11.024	92	0.0058249	0.007761	209770000	205170000	4604400
Actinin alpha 1 isoform 3;ACTN1 protein;Actinin alpha 1 isoform b;Alpha-actinin cytoskeletal isoform;Alpha-actinin-1;F-actin cross-linking protein;Non-muscle alpha-actinin-1;cDNA FLJ54432, highly similar to Alpha-actinin-1;Alpha-actinin 1;cDNA FLJ54739, highly similar to Alpha-actinin-1;cDNA FLJ53313, highly similar to Alpha-actinin-1;cDNA FLJ40884 fis, clone UTERU2000607, highly similar to Alpha…	ACTN1	Actinin alpha 1 isoform 3;alpha-actinin-1 isoform a;Isoform 1 of Alpha-actinin-1;Isoform 2 of Alpha-actinin-1;95 kDa protein;cDNA FLJ53313, highly similar to Alpha-actinin-1;cDNA FLJ40884 fis, clone UTERU2000607, highly similar to Alpha-actinin-1	B7TY16;A1L0V1;Q1HE25;P12814-1;P12814;B7Z2W3;Q5ZEZ4;P12814-2;B7Z565;B4DFY0;B3KUX9;B4DRP5	13	8	3	9.6	107.14	930	1.4383e-94	0.030559	2471600	2017900	453720
3D3/LYRIC;Astrocyte elevated gene-1 protein;Lysine-rich CEACAM1 co-isolated protein;Metadherin;Metastasis adhesion protein;Protein LYRIC	AEG1;LYRIC;MTDH	Protein LYRIC;Uncharacterized protein;Protein	Q86UE4;E5RJU9	3	1	1	1.9	63.836	582	1.7691e-24	0.041304	3374700	2750900	623860			cut-offs were calculated from the H/L ratios of non biotinylated proteins, which served as an internal control. (mean ±2 standard deviations)
Ornithine aminotransferase, hepatic form;Ornithine aminotransferase, mitochondrial;Ornithine aminotransferase, renal form;Ornithine delta-aminotransferase;Ornithine--oxo-acid aminotransferase	OAT	Ornithine aminotransferase, mitochondrial	P04181	3	5	4	12.5	48.534	439	1.3577e-20	0.044404	27359000	17242000	10117000
17-beta-hydroxysteroid dehydrogenase 4;3-alpha,7-alpha,12-alpha-trihydroxy-5-beta-cholest-24-enoyl-CoA hydratase;3-hydroxyacyl-CoA dehydrogenase;D-bifunctional protein;Peroxisomal multifunctional enzyme type 2;cDNA, FLJ92803, highly similar to Homo sapiens hydroxysteroid (17-beta) dehydrogenase 4 (HSD17B4), mRNA;cDNA FLJ59445, highly similar to Peroxisomal multifunctional enzyme type 2;cDNA FLJ55…	EDH17B4;HSD17B4	Peroxisomal multifunctional enzyme type 2;54 kDa protein;peroxisomal multifunctional enzyme type 2 isoform 1;peroxisomal multifunctional enzyme type 2 isoform 3;Uncharacterized protein	P51659;B2R659;B4DVS5;B4DNV1;B4DSD0;E7ER27;B4DDM5;E9PB82;B4DI68;E7EWE5	8	10	10	15.2	79.685	736	6.9125e-125	0.046818	35256000	30145000	5110500
Aconitase 2, mitochondrial;Aconitate hydratase, mitochondrial;Citrate hydro-lyase;cDNA, FLJ95737, highly similar to Homo sapiens aconitase 2, mitochondrial (ACO2), nuclear geneencoding mitochondrial protein, mRNA;cDNA FLJ54329, highly similar to Aconitate hydratase, mitochondrial(EC 4.2.1.3);cDNA FLJ52327, highly similar to Aconitate hydratase, mitochondrial (EC 4.2.1.3);cDNA FLJ51705, highly sim…	ACO2;RP3-347H13.8-002;ACON	Aconitase 2, mitochondrial;Aconitate hydratase, mitochondrial;83 kDa protein;cDNA FLJ60429, highly similar to Aconitate hydratase, mitochondrial;cDNA FLJ50886, highly similar to Aconitate hydratase, mitochondrial;Aconitase (Fragment)	A2A274;Q99798;B2RBW5;B4DJW1;B4DLY4;B4DZ08;Q71UF1;B4DEC3;B4DW08;O75944	6	5	5	7	87.819	805	6.9958e-25	0.053692	21760000	12617000	9142400
Non-specific lipid-transfer protein;Propanoyl-CoA C-acyltransferase;SCP-chi;SCPX;Sterol carrier protein 2;Sterol carrier protein X;cDNA, FLJ93299, highly similar to Homo sapiens sterol carrier protein 2 (SCP2), mRNA;cDNA FLJ53982, highly similar to Nonspecific lipid-transfer protein (EC 2.3.1.176);Putative uncharacterized protein SCP2;cDNA FLJ53991, highly similar to Nonspecific lipid-transfer pr…	SCP2	Isoform SCPx of Non-specific lipid-transfer protein;non-specific lipid-transfer protein isoform 7 proprotein;non-specific lipid-transfer protein isoform 6 proprotein;non-specific lipid-transfer protein isoform 8 proprotein;Isoform SCP2 of Non-specific lipi	P22307-1;P22307;B2R761;B4DGJ9;C9JC79;A6NM69;B4DHP6;P22307-2;E1B6W5;B4E0J3	9	4	4	7.1	58.993	547	1.4069e-30	0.06209	25073000	8970800	16102000
Galectin-7;HKL-14;p53-induced gene 1 protein;PI7	LGALS7;LGALS7B;PIG1	Galectin-7	P47929	1	1	1	8.1	15.075	136	2.5571e-35	0.063528	12044000	10313000	1731400
Deubiquitinating enzyme 5;Isopeptidase T;Ubiquitin carboxyl-terminal hydrolase 5;Ubiquitin thioesterase 5;Ubiquitin-specific-processing protease 5	ISOT;USP5	Isoform Long of Ubiquitin carboxyl-terminal hydrolase 5;Isoform Short of Ubiquitin carboxyl-terminal hydrolase 5	P45974-1;P45974;P45974-2	3	5	5	6.6	95.785	858	2.0437e-22	0.063585	20001000	14387000	5613900
Beta-1 metal-binding globulin;Serotransferrin;Siderophilin;TF protein;cDNA FLJ56687, highly similar to Serotransferrin;cDNA FLJ54111, highly similar to Serotransferrin;cDNA FLJ53691, highly similar to Serotransferrin;Transferrin;Transferrin variant;cDNA FLJ54029, highly similar to Serotransferrin;Transferrin, isoform CRA_c;Putative uncharacterized protein TF	PRO1400;TF;hCG_2023558	Serotransferrin;cDNA FLJ54029, highly similar to Serotransferrin	P02787;A0PJA6;B4DEX9;B4DI57;B4E1B2;Q06AH7;Q53H26;B4DHZ6;C9JVG0	6	8	7	11.3	77.063	698	1.9589e-40	0.06903	23196000	16747000	6448800
Alpha-actinin-4;F-actin cross-linking protein;Non-muscle alpha-actinin 4;ACTN4 protein;Actinin alpha4 isoform	ACTN4	Alpha-actinin-4;Alpha actinin 4 short isoform;Actinin alpha4 isoform;39 kDa protein	O43707;D6PXK4;Q96BG6;A4K467	6	11	6	13.5	104.85	911	3.8074e-87	0.071573	48245000	32759000	15487000
Aldehyde dehydrogenase family 7 member A1;Alpha-aminoadipic semialdehyde dehydrogenase;Antiquitin-1;Betaine aldehyde dehydrogenase;Delta1-piperideine-6-carboxylate dehydrogenase;cDNA FLJ56008, highly similar to Aldehyde dehydrogenase family 7 member A1 (EC 1.2.1.3)	ALDH7A1;ATQ1	Isoform 1 of Alpha-aminoadipic semialdehyde dehydrogenase;Isoform 2 of Alpha-aminoadipic semialdehyde dehydrogenase;alpha-aminoadipic semialdehyde dehydrogenase isoform 3;Isoform 3 of Alpha-aminoadipic semialdehyde dehydrogenase	P49419-1;P49419;P49419-2;B4DMA0;E7EPT3;P49419-3	4	3	3	4.6	58.486	539	0.0063682	0.07301	6792600	4692100	2100500
67 kDa calelectrin;Annexin A6;Annexin VI;Annexin-6;Calphobindin-II;Chromobindin-20;Lipocortin VI;p68;p70;Protein III;cDNA FLJ75116, highly similar to Homo sapiens annexin A6, transcript variant 1, mRNA;cDNA FLJ53686, highly similar to Annexin A6;Annexin A6, isoform CRA_c;Putative uncharacterized protein ANXA6;cDNA FLJ53638, highly similar to Annexin A6;cDNA FLJ26567 fis, clone LNF05260, highly si…	ANX6;ANXA6;hCG_39152	Annexin A6;Uncharacterized protein;annexin A6 isoform 2;cDNA FLJ53638, highly similar to Annexin A6;Annexin family protein;Uncharacterized protein;Uncharacterized protein	P08133;A8K3Q7;B7Z8A7;A6NN80;E5RJR0;E9PGK1;B7Z582;E5RK69;E7EMC6;Q6ZP35	13	12	12	16	75.872	673	1.8949e-43	0.075571	41123000	30135000	10988000
Citrate hydro-lyase;Cytoplasmic aconitate hydratase;Ferritin repressor protein;Iron regulatory protein 1;Iron-responsive element-binding protein 1;cDNA FLJ37705 fis, clone BRHIP2017404, highly similar to cGMP-dependent 3,5-cyclic phosphodiesterase (EC 3.1.4.17);cGMP-dependent 3,5-cyclic phosphodiesterase;Cyclic GMP-stimulated phosphodiesterase;cDNA, FLJ92780, highly similar to Homo sapiens phosph…	ACO1;IREB1;IRP1;PDE2A;RP11-334P12.1-003	Cytoplasmic aconitate hydratase;Iron regulatory protein 1;Uncharacterized protein;cGMP-dependent 3,5-cyclic phosphodiesterase;cGMP-dependent 3,5-cyclic phosphodiesterase isoform 2;cGMP-dependent 3,5-cyclic phosphodiesterase isoform 3;cDNA FLJ53510, h	P21399;Q9HBB2;B3KT60;E9PE88;O00408;B2R646;Q8IW54;E9PGI1;Q5J793;B4DIM1;B3KRV5;E9PEF1;Q6ZMR1;Q59FI0;Q5VZA6	13	2	2	1.7	98.398	889	0.0085058	0.077484	2905600	2427300	478250
35-alpha calcimedin;Annexin A3;Annexin III;Annexin-3;Inositol 1,2-cyclic phosphate 2-phosphohydrolase;Lipocortin III;Placental anticoagulant protein III	ANX3;ANXA3	Annexin A3;Uncharacterized protein	P12429;D6RA82	6	8	8	26.3	36.375	323	2.5607e-72	0.078981	74519000	62449000	12070000
Glutathione synthase;Glutathione synthetase;cDNA FLJ51785, highly similar to Glutathione synthetase (EC 6.3.2.3);cDNA FLJ50601, highly similar to Glutathione synthetase (EC 6.3.2.3)	GSS	Glutathione synthetase;Glutathione synthetase;cDNA FLJ50601, highly similar to Glutathione synthetase	P48637;B7Z1C5;B6F210;Q8TDA8;B7Z514	3	4	4	7.4	52.384	474	3.0638e-09	0.079503	11502000	6868700	4633400
Pitrilysin metalloproteinase 1;Presequence protease, mitochondrial;Putative uncharacterized protein PITRM1;cDNA FLJ53321, highly similar to Homo sapiens pitrilysin metallopeptidase 1 (PITRM1), mRNA;cDNA FLJ10321 fis, clone NT2RM2000504, highly similar to Homo sapiens pitrilysin metallopeptidase 1 (PITRM1), mRNA;cDNA FLJ13414 fis, clone PLACE1001748, highly similar to Homo sapiens pitrilysin metal…	KIAA1104;MP1;PITRM1	Uncharacterized protein;Isoform 2 of Presequence protease, mitochondrial;cDNA FLJ53321, highly similar to Homo sapiens pitrilysin metallopeptidase 1 (PITRM1), mRNA;cDNA FLJ54537, highly similar to Homo sapiens pitrilysin metallopeptidase 1 (PITRM1), mRNA;c	Q5JRX3-1;Q5JRX3;C9JSL2;Q5JRX3-2;B4DH07;B3KM51;B3KN37;B4DRW8;B4E0J8;E7ES23;E9PFN2	7	5	5	4.7	117.51	1038	4.1452e-10	0.080175	11243000	7633700	3609200
6-phosphogluconate dehydrogenase, decarboxylating	PGD;PGDH;hCG_2006054;RP4-736L20.2-001	6-phosphogluconate dehydrogenase, decarboxylating;6-phosphogluconate dehydrogenase, decarboxylating;51 kDa protein;6-phosphogluconate dehydrogenase, decarboxylating	P52209;A8K2Y9;B4E2U0;B4DQJ8;B4DL86	6	5	5	12.4	53.139	483	7.4762e-65	0.084229	36301000	21779000	14522000
Acyl-coenzyme A thioester hydrolase 2a;Acyl-coenzyme A thioesterase 2, mitochondrial;CTE-Ia;Long-chain acyl-CoA thioesterase 2;ZAP128;Acyl-coenzyme A thioesterase 1;CTE-I;CTE-Ib;Inducible cytosolic acyl-coenzyme A thioester hydrolase;Long chain acyl-CoA thioester hydrolase;Acyl-CoA thioesterase 1;cDNA FLJ54503, highly similar to Acyl-coenzyme A thioesterase 1 (EC 3.1.2.2);Putative uncharacterized…	ACOT2;PTE2;PTE2A;ACOT1;CTE1	Isoform 1 of Acyl-coenzyme A thioesterase 2, mitochondrial;Acyl-coenzyme A thioesterase 1;Putative uncharacterized protein;Conserved hypothetical protein	P49753-1;P49753;Q86TX2;A1L172;B4DV16;E9KL42;B7ZMC1	6	5	5	10.6	53.218	483	3.0026e-10	0.084671	9394700	6956400	2438300
2,3-epoxysqualene--lanosterol cyclase;Lanosterol synthase;Oxidosqualene--lanosterol cyclase;cDNA, FLJ92849, highly similar to Homo sapiens lanosterol synthase (2,3-oxidosqualene-lanosterol cyclase) (LSS), mRNA;cDNA FLJ58192, highly similar to Lanosterol synthase (EC 5.4.99.7)	LSS;OSC	Lanosterol synthase;lanosterol synthase isoform 2;lanosterol synthase isoform 3	P48449;B2R694;B4DJZ9;E9PC63	4	7	7	10.7	83.308	732	8.689e-23	0.086016	17266000	11609000	5656900
Citrate synthase, mitochondrial;Citrate synthase	CS	Citrate synthase, mitochondrial;Citrate synthase	O75390;B3KTN4;B4DJV2;Q0QEL2	3	12	12	26	51.712	466	7.3236e-85	0.086304	552420000	302540000	249880000
Glutathione S-transferase P;GST class-pi;GSTP1-1;Glutathione S-transferase pi;Putative uncharacterized protein GSTP1	FAEES3;GST3;GSTP1	Glutathione S-transferase P;Uncharacterized protein	P09211;C7DJS1;C7DJS2;A8MX94;B2C310	3	5	5	26.2	23.356	210	2.7371e-126	0.086882	64216000	54827000	9389000
PA2G4 protein;Cell cycle protein p38-2G4 homolog;ErbB3-binding protein 1;Proliferation-associated protein 2G4;cDNA FLJ75526, highly similar to Homo sapiens proliferation-associated 2G4, 38kDa (PA2G4), mRNA;P38-2G4	PA2G4;EBP1	PA2G4 protein (Fragment);Proliferation-associated protein 2G4	Q05D08;Q9UQ80;A8K6Y1;Q13548;Q6PIN5	2	7	7	16.5	45.151	406	4.1086e-57	0.08947	16419000	11898000	4521000
Leupin;Peptidase inhibitor 11;Serpin B4;Squamous cell carcinoma antigen 2;cDNA FLJ75229, highly similar to Homo sapiens serpin peptidase inhibitor, clade B (ovalbumin), member 4 (SERPINB4), mRNA;SCCA2b;Serpin peptidase inhibitor, clade B (Ovalbumin), member 4, isoform CRA_a;Putative uncharacterized protein SERPINB4	PI11;SCCA2;SERPINB4;hCG_1775797	Serpin B4;Serpin peptidase inhibitor, clade B (Ovalbumin), member 4, isoform CRA_a;Uncharacterized protein;Squamous cell carcinoma antigen 2 (Fragment)	P48594;A8K847;Q86W03;Q86W05;Q9BYF7;C9JZ65;O95740	4	4	2	10.3	44.853	390	1.3578e-19	0.092236	30990000	28825000	2164200
Catalase;Similar to catalase	CAT	Catalase	P04040;B4DWK8;Q8TAK2	1	9	9	19.4	59.755	527	1.6094e-82	0.092464	36921000	18890000	18031000
Activated RNA polymerase II transcriptional coactivator p15;p14;Positive cofactor 4;SUB1 homolog;Activated RNA polymerase II transcription cofactor 4 variant;cDNA, FLJ92014, highly similar to Homo sapiens SUB1 homolog (S. cerevisiae) (SUB1), mRNA;PC4 protein;SUB1 homolog (S. cerevisiae);SUB1 homolog (S. cerevisiae), isoform CRA_a;cDNA FLJ51816, highly similar to Activated RNA polymerase II transc…	PC4;RPO2TC1;SUB1;hCG_1781938	Activated RNA polymerase II transcriptional coactivator p15;cDNA FLJ51816, highly similar to Activated RNA polymerase II transcriptional coactivator p15;Uncharacterized protein;Activated RNA polymerase II transcription cofactor 4 (Fragment)	P53999;Q59G24;Q6IBA2;B7Z1Z0;D6RC37;D6R970;Q6E433	4	4	4	30.7	14.395	127	4.7677e-65	0.092508	129840000	116600000	13232000
Heme oxygenase 1;cDNA, FLJ93605, highly similar to Homo sapiens heme oxygenase (decycling) 1 (HMOX1), mRNA;Heme oxygenase (Decycling) 1;HMOX1 protein	HMOX1;HO;HO1;hCG_40033	Heme oxygenase 1	P09601;B2R7U4;F2YMD9;Q6FH11;Q96DI8	2	3	3	11.8	32.818	288	1.5123e-08	0.092685	7050900	4520400	2530500
CYPLI;Cytochrome P450 51A1;Cytochrome P450-14DM;Cytochrome P450LI;Lanosterol 14-alpha demethylase;Sterol 14-alpha demethylase;CYP51A1 protein;cDNA FLJ34004 fis, clone FCBBF1000232, highly similar to Cytochrome P450 51A1 (EC 1.14.13.70)	CYP51;CYP51A1	lanosterol 14-alpha demethylase isoform 1;cDNA FLJ34004 fis, clone FCBBF1000232, highly similar to Cytochrome P450 51A1;Isoform 2 of Lanosterol 14-alpha demethylase	Q16850-1;Q16850;Q05D40;B3KRC6;Q16850-2	4	4	4	9.4	57.278	509	5.2084e-25	0.092897	5263100	3351600	1911400
cDNA FLJ46359 fis, clone TESTI4049786, highly similar to Hexokinase-1 (EC 2.7.1.1);Brain form hexokinase;Hexokinase type I;Hexokinase-1;cDNA FLJ78173, highly similar to Homo sapiens hexokinase 1 (HK1) mRNA;Hexokinase 1;Hexokinase 1 isoform HKI variant;cDNA FLJ56506, highly similar to Hexokinase-1 (EC 2.7.1.1);Hexokinase;cDNA FLJ33948 fis, clone CTONG2018379, highly similar to Hexokinase-1 (EC 2.7…	HK1;RP11-404C6.1-003;HK1-ta;HK1-tb;RP11-404C6.1-016;RP11-404C6.1-004	cDNA FLJ46359 fis, clone TESTI4049786, highly similar to Hexokinase-1;Isoform 3 of Hexokinase-1;Isoform 1 of Hexokinase-1;Isoform 2 of Hexokinase-1;cDNA FLJ56506, highly similar to Hexokinase-1;hexokinase-1 isoform HKI-td;Isoform 4 of Hexokinase-1	B3KXY9;E7ENR4;P19367-3;P19367;A8K7J7;B1AR61;P78542;Q59FD4;P19367-1;P19367-2;B1AR63;B4DG62;Q71V75;B1AR62;B3KRA9;E9PCK0;P19367-4	10	10	10	10.2	106.25	952	5.9922e-23	0.093668	47670000	31763000	15907000
Metavinculin;Vinculin;cDNA FLJ45031 fis, clone BRAWH3018548, highly similar to Vinculin;cDNA FLJ59659, highly similar to Vinculin	VCL;RP11-178G16.3-002	Isoform 2 of Vinculin;Isoform 1 of Vinculin;cDNA FLJ45031 fis, clone BRAWH3018548, highly similar to Vinculin;cDNA FLJ59659, highly similar to Vinculin	P18206-1;P18206;Q5JQ13;P18206-2;B3KXA2;B4E3Q9	7	24	24	21.6	123.8	1134	7.5784e-113	0.094469	81743000	56054000	25689000
Glycine hydroxymethyltransferase;Serine hydroxymethyltransferase, mitochondrial;Serine methylase;Serine hydroxymethyltransferase;cDNA FLJ58585, highly similar to Serine hydroxymethyltransferase, mitochondrial (EC 2.1.2.1);Serine hydroxymethyltransferase 2 (Mitochondrial), isoform CRA_h	SHMT2;DKFZp686P09201;hCG_41231	Serine hydroxymethyltransferase, mitochondrial;serine hydroxymethyltransferase, mitochondrial isoform 3;Serine hydroxymethyltransferase;serine hydroxymethyltransferase, mitochondrial isoform 2 precursor;Serine hydroxymethyltransferase;Serine hydroxymethylt	P34897;B4DJQ3;Q53ET4;Q5HYG8;B7Z9F1;B4DP88;B4E1G2;E7EQ19;Q8N1A5;B4DW25;B4DWA7;E7EU43;Q5BJF5;B4DJ63;B4DLV4	10	14	13	28.4	55.992	504	1.2178e-54	0.094475	172080000	120050000	52030000
Glycogen phosphorylase, liver form;Phosphorylase;Glycogen phosphorylase, brain form;Glycogen phosphorylase, muscle form;Myophosphorylase	PYGL;PYGB;PYGM;hCG_23403;RP5-965G21.1-002	Glycogen phosphorylase, liver form;glycogen phosphorylase, liver form isoform 2;Glycogen phosphorylase, brain form;Glycogen phosphorylase, muscle form;Phosphorylase;Phosphorylase;glycogen phosphorylase, muscle form isoform 2;Phosphorylase;Protein;Phosphory	P06737;B2R825;B4DUB7;E9PMM6;P11216;B4DSD8;Q59GM9;Q8TDG6;P11217;B2RB32;B4DRW6;E9PK47;A6NDY6;B4DRQ4;E7END0;Q5JWL9	10	2	2	2	97.147	847	0.018922	0.098061	1519300	1090100	429200
Annexin A7;Annexin VII;Annexin-7;Synexin;cDNA, FLJ92798, highly similar to Homo sapiens annexin A7 (ANXA7), transcript variant 2, mRNA;cDNA, FLJ93494, highly similar to Homo sapiens annexin A7 (ANXA7), transcript variant 1, mRNA;Annexin VII isoform 1 variant;cDNA FLJ55060, highly similar to Annexin A7;cDNA FLJ54149, highly similar to Annexin A7;cDNA FLJ54191, highly similar to Annexin A7	ANX7;ANXA7;OK/SW-cl.95;SNX	Isoform 1 of Annexin A7;Isoform 2 of Annexin A7;cDNA FLJ55060, highly similar to Annexin A7;cDNA FLJ54191, highly similar to Annexin A7	P20073-1;P20073;B2R657;B2R7L2;Q53HM8;P20073-2;B4DHY4;B4DT77;B4DWU2	4	9	9	17	52.739	488	3.0538e-46	0.098817	26306000	22169000	4137200
Aspartate aminotransferase, cytoplasmic;Glutamate oxaloacetate transaminase 1;Transaminase A;Growth-inhibiting protein 18;cDNA FLJ51134, highly similar to Aspartate aminotransferase, cytoplasmic (EC 2.6.1.1);cDNA FLJ53826, highly similar to Aspartate aminotransferase, cytoplasmic (EC 2.6.1.1)	GOT1;GIG18	Aspartate aminotransferase, cytoplasmic;Aspartate aminotransferase;Aspartate aminotransferase	P17174;Q2TU84;B7Z7E9;B7Z1I2	3	5	5	12.1	46.247	413	1.2379e-13	0.10646	18296000	11720000	6576200
Hsc70-interacting protein;Progesterone receptor-associated p48 protein;Protein FAM10A1;Putative tumor suppressor ST13;Renal carcinoma antigen NY-REN-33;Suppression of tumorigenicity 13 protein;cDNA FLJ53687, highly similar to Hsc70-interacting protein;cDNA, FLJ79054, highly similar to Hsc70-interacting protein;ST13 protein;Aging-associated protein 14b;Aging-associated protein 2;Suppression of tum…	FAM10A1;HIP;SNC6;ST13;AAG2;hCG_1790973;FAM10A5;FAM10A4;RP3-408N23.5-003	Hsc70-interacting protein;Putative protein FAM10A5;Protein;Putative protein FAM10A4;ST13 protein	P50502;B4E0U6;B7ZA40;Q0IJ56;Q1XBU6;Q2TU77;Q8NFI4;Q8IZP2;B1AHN5;D6W507;Q3KNR6	5	6	6	17.1	41.331	369	1.0006e-39	0.11095	15141000	11219000	3921500
Cell migration-inducing gene 10 protein;Phosphoglycerate kinase 1;Primer recognition protein 2;Phosphoglycerate kinase	MIG10;OK/SW-cl.110;PGK1;PGKA;hCG_20034	Phosphoglycerate kinase 1;Phosphoglycerate kinase;Phosphoglycerate kinase;Phosphoglycerate kinase	P00558;A8K4W6;B7Z7A9;B4DHB3;E7ERH5;B4E1H9	6	13	11	31.2	44.614	417	5.6059e-40	0.11279	99409000	83529000	15880000
cDNA FLJ53464, highly similar to Threonyl-tRNA synthetase, cytoplasmic (EC 6.1.1.3);Threonyl-tRNA synthetase variant;Threonine--tRNA ligase;Threonyl-tRNA synthetase, cytoplasmic;cDNA, FLJ96812, highly similar to Homo sapiens threonyl-tRNA synthetase (TARS), mRNA;TARS protein;cDNA FLJ38533 fis, clone HCHON2001108, highly similar to Threonyl-tRNA synthetase, cytoplasmic (EC 6.1.1.3);cDNA FLJ55705, …	TARS	cDNA FLJ53464, highly similar to Threonyl-tRNA synthetase, cytoplasmic;Threonyl-tRNA synthetase, cytoplasmic;cDNA FLJ38533 fis, clone HCHON2001108, highly similar to Threonyl-tRNA synthetase, cytoplasmic;cDNA FLJ55705, highly similar to Threonyl-tRNA synth	B4DEG8;Q53GX7;P26639;B2RDX5;Q5M7Z9;B3KTN2;B4DKZ9;E7ERI3	14	11	11	14.2	86.86	756	8.963e-22	0.11285	99763000	90226000	9537100
cDNA FLJ60299, highly similar to Rab GDP dissociation inhibitor beta;GDP dissociation inhibitor 2;Guanosine diphosphate dissociation inhibitor 2;Rab GDP dissociation inhibitor beta;cDNA, FLJ92845, Homo sapiens GDP dissociation inhibitor 2 (GDI2), mRNA;GDI2 protein;GDP dissociation inhibitor 2 isoform 1;GDP dissociation inhibitor 2, isoform CRA_b;cDNA FLJ16452 fis, clone BRAWH3002467, highly simil…	GDI2;RP11-318E3.2-007;RABGDIB;hCG_24071;RP11-318E3.2-001;RP11-318E3.2-002	cDNA FLJ60299, highly similar to Rab GDP dissociation inhibitor beta;Rab GDP dissociation inhibitor beta;rab GDP dissociation inhibitor beta isoform 2	B4DLV7;E7EU23;Q5SX90;P50395;Q6IAT1;B3KVE3;Q5SX88;Q8TB95	9	7	7	16	51.153	449	1.3112e-33	0.11287	23238000	16986000	6251900
4-trimethylaminobutyraldehyde dehydrogenase;Aldehyde dehydrogenase E3 isozyme;Aldehyde dehydrogenase family 9 member A1;Gamma-aminobutyraldehyde dehydrogenase;R-aminobutyraldehyde dehydrogenase;cDNA FLJ55534, highly similar to 4-trimethylaminobutyraldehyde dehydrogenase (EC 1.2.1.47);cDNA FLJ53231, highly similar to 4-trimethylaminobutyraldehyde dehydrogenase(EC 1.2.1.47);Aldehyde dehydrogenase 9…	ALDH4;ALDH7;ALDH9;ALDH9A1;hCG_21745	4-trimethylaminobutyraldehyde dehydrogenase;cDNA FLJ61765, highly similar to 4-trimethylaminobutyraldehyde dehydrogenase	P49189;B4DE91;B4DX14;B9EKV4;B4DXY7;B4DYY1	2	7	7	15.6	56.291	518	2.9282e-30	0.11521	35270000	8695500	26574000
Calcium-activated neutral proteinase 1;Calpain mu-type;Calpain-1 catalytic subunit;Calpain-1 large subunit;Cell proliferation-inducing gene 30 protein;Micromolar-calpain;cDNA, FLJ96627, highly similar to Homo sapiens calpain 1, (mu/I) large subunit (CAPN1), mRNA;Putative uncharacterized protein CAPN1;cDNA FLJ53224, highly similar to Calpain-1 catalytic subunit (EC 3.4.22.52)	CANPL1;CAPN1;PIG30	Calpain-1 catalytic subunit;calpain-1 catalytic subunit isoform b	P07384;B2RDI5;A8MSM1;B4DWH5	13	3	3	3.6	81.889	714	0.013431	0.1183	2973000	1868400	1104600
3-5 RNA exonuclease OLD35;PNPase old-35;Polynucleotide phosphorylase 1;Polynucleotide phosphorylase-like protein;Polyribonucleotide nucleotidyltransferase 1, mitochondrial	PNPASE;PNPT1	Polyribonucleotide nucleotidyltransferase 1, mitochondrial	Q8TCS8	3	3	3	4.5	85.95	783	7.1624e-27	0.1215	2581000	1704200	876830
Epoxide hydratase;Epoxide hydrolase 1;Microsomal epoxide hydrolase;cDNA, FLJ93975, highly similar to Homo sapiens epoxide hydrolase 1, microsomal (xenobiotic) (EPHX1), mRNA;EPHX1 protein	EPHX;EPHX1;EPOX	Epoxide hydrolase 1	P07099;B2R8N0;Q6FGZ3	3	11	11	19.1	52.948	455	3.4848e-30	0.12275	215980000	180530000	35447000
Adipocyte plasma membrane-associated protein;Protein BSCv;Chromosome 20 open reading frame 3	APMAP;C20orf3;UNQ1869/PRO4305;RP4-568C11.2-002	Isoform 1 of Adipocyte plasma membrane-associated protein;Chromosome 20 open reading frame 3;Isoform 2 of Adipocyte plasma membrane-associated protein	Q9HDC9-1;Q9HDC9;A2A2F9;Q9HDC9-2	3	5	5	11.8	46.48	416	2.6794e-42	0.12334	55139000	45512000	9626600
Fer-1-like protein 3;Myoferlin;Putative uncharacterized protein MYOF	FER1L3;KIAA1207;MYOF	Isoform 1 of Myoferlin;235 kDa protein;Uncharacterized protein;Isoform 6 of Myoferlin;Isoform 2 of Myoferlin;Uncharacterized protein;Isoform 5 of Myoferlin	Q9NZM1-1;Q9NZM1;Q9NZM1-3;C9JCN0;Q9NZM1-6;Q9NZM1-2;Q9NZM1-7;E2QRI2;Q9NZM1-5	9	12	12	6.4	234.71	2061	1.3838e-77	0.12519	26218000	13477000	12742000
Anchorin CII;Annexin A5;Annexin V;Annexin-5;Calphobindin I;Endonexin II;Lipocortin V;Placental anticoagulant protein 4;Placental anticoagulant protein I;Thromboplastin inhibitor;Vascular anticoagulant-alpha;cDNA FLJ52002, highly similar to Annexin A5	ANX5;ANXA5;ENX2;PP4	Annexin A5;Uncharacterized protein;Uncharacterized protein;Uncharacterized protein;Uncharacterized protein	P08758;E7ENQ5;D6RBL5;D6RBE9;B4DNG6;E9PHT9	6	13	12	34.4	35.936	320	1.0794e-54	0.12544	272230000	240140000	32094000
Hydroxyacyl-coenzyme A dehydrogenase, mitochondrial;Medium and short-chain L-3-hydroxyacyl-coenzyme A dehydrogenase;Short-chain 3-hydroxyacyl-CoA dehydrogenase;cDNA FLJ38699 fis, clone KIDNE2002168, highly similar to Short chain 3-hydroxyacyl-CoA dehydrogenase, mitochondrial (EC 1.1.1.35);cDNA, FLJ95242, highly similar to Homo sapiens L-3-hydroxyacyl-Coenzyme A dehydrogenase, short chain (HADHSC)…	HAD;HADH;HADHSC;SCHAD	Isoform 2 of Hydroxyacyl-coenzyme A dehydrogenase, mitochondrial;cDNA FLJ38699 fis, clone KIDNE2002168, highly similar to Short chain 3-hydroxyacyl-CoA dehydrogenase, mitochondrial;Isoform 1 of Hydroxyacyl-coenzyme A dehydrogenase, mitochondrial	Q16836-2;Q16836;B3KTT6;E9PF18;Q16836-1;B2RB06	3	3	3	7.7	42.139	390	2.2292e-09	0.12997	31815000	25464000	6351100
Epidermal-type fatty acid-binding protein;Fatty acid-binding protein 5;Fatty acid-binding protein, epidermal;Psoriasis-associated fatty acid-binding protein homolog	FABP5	Fatty acid-binding protein, epidermal;11 kDa protein	Q01469;E7DVW5	2	3	3	11.9	15.164	135	2.0443e-07	0.13018	10664000	9535600	1127900
Arylacetamide deacetylase-like 1;Neutral cholesterol ester hydrolase 1	AADACL1;KIAA1363;NCEH1	neutral cholesterol ester hydrolase 1 isoform a;neutral cholesterol ester hydrolase 1 isoform b	Q6PIU2-2;Q6PIU2;Q6PIU2-1	2	1	1	2.7	49.881	448	3.2259e-22	0.13088	5611000	4592300	1018700
14-3-3 protein sigma;Epithelial cell marker protein 1;Stratifin	HME1;SFN	Isoform 1 of 14-3-3 protein sigma;Isoform 2 of 14-3-3 protein sigma	P31947-1;P31947;P31947-2	2	11	6	41.5	27.774	248	4.8411e-51	0.13257	31704000	25448000	6256200
Calgranulin-A;Calprotectin L1L subunit;Cystic fibrosis antigen;Leukocyte L1 complex light chain;Migration inhibitory factor-related protein 8;Protein S100-A8;S100 calcium-binding protein A8;Urinary stone protein band A	CAGA;CFAG;MRP8;S100A8	Protein S100-A8	P05109	1	4	4	39.8	10.834	93	5.5047e-31	0.13496	74254000	72374000	1879600
MLC-2A;Myosin regulatory light chain 12B;Myosin regulatory light chain 20 kDa;Myosin regulatory light chain 2-B, smooth muscle isoform;Myosin regulatory light chain MRLC2;SHUJUN-1;MLC-2B;Myosin regulatory light chain 12A;Myosin regulatory light chain 2, nonsarcomeric;Myosin regulatory light chain MRLC3;Myosin RLC;Myosin regulatory light chain;Myosin regulatory light chain MRCL3 variant;cDNA FLJ76…	MRLC2;MYL12B;MYLC2B;MLCB;MRLC3;MYL12A;RLC;hCG_2045956;MRCL3;MLC2;MRLC1;MYL9;MYRL2	Myosin regulatory light chain 12B;Myosin regulatory light chain 12A;Similar to Myosin regulatory light chain MRCL2;Myosin regulatory light polypeptide 9	O14950;P19105;Q2F834;Q53HL1;Q53X45;P24844;Q6IBG1;Q71U02	7	5	5	29.7	19.779	172	3.2349e-50	0.13518	35143000	29476000	5667100
Leukotriene A(4) hydrolase;Leukotriene A-4 hydrolase;cDNA FLJ52432, highly similar to Leukotriene A-4 hydrolase (EC 3.3.2.6);Leukotriene A4 hydrolase variant	LTA4;LTA4H	Isoform 1 of Leukotriene A-4 hydrolase;Isoform 2 of Leukotriene A-4 hydrolase;Isoform 3 of Leukotriene A-4 hydrolase	P09960-1;P09960;B4DVZ8;Q59ES1;P09960-2;P09960-3;E7EU97	4	3	3	5.1	69.284	611	4.7724e-11	0.13554	2606100	1921200	684850
Cytosolic phospholipase A2;Lysophospholipase;Phosphatidylcholine 2-acylhydrolase;Phospholipase A2;Phospholipase A2 group IVA;cDNA FLJ75258, highly similar to Homo sapiens phospholipase A2, group IVA (cytosolic, calcium-dependent) (PLA2G4A), mRNA;cDNA FLJ51413, highly similar to Cytosolic phospholipase A2	CPLA2;PLA2G4;PLA2G4A	Cytosolic phospholipase A2;cDNA FLJ51413, highly similar to Cytosolic phospholipase A2	P47712;A8K2S1;B4DZI4;E7EU42	2	2	2	2.1	85.238	749	0.051652	0.13582	1766200	1370000	396150
Fructose-bisphosphate aldolase A;Lung cancer antigen NY-LU-1;Muscle-type aldolase;Fructose-bisphosphate aldolase	ALDA;ALDOA	45 kDa protein;Fructose-bisphosphate aldolase A	P04075;A4UCS9;A4UCT0	6	17	13	33.7	45.26	418	3.7409e-138	0.14085	723180000	605640000	117540000
OGDH protein;Oxoglutarate (Alpha-ketoglutarate) dehydrogenase;cDNA FLJ53308, highly similar to 2-oxoglutarate dehydrogenase E1 component, mitochondrial (EC 1.2.4.2);cDNA FLJ53323, highly similar to 2-oxoglutarate dehydrogenase E1 component, mitochondrial (EC 1.2.4.2);cDNA FLJ54570, highly similar to 2-oxoglutarate dehydrogenase E1 component, mitochondrial (EC 1.2.4.2);cDNA FLJ54748, highly simila…	OGDH;KIAA1290;OGDHL	Uncharacterized protein;Uncharacterized protein;2-oxoglutarate dehydrogenase, mitochondrial;2-oxoglutarate dehydrogenase, mitochondrial isoform 3 precursor;cDNA FLJ59557, highly similar to 2-oxoglutarate dehydrogenase E1 component, mitochondrial;Isoform 1	A2VCT3;A5XEI1;E9PCR7;A2VCT2;B4DF00;B4DH65;B4DZ95;B4E2U9;E9PDF2;Q02218;E9PBM1;B4DK55;B4E3E9;E9PFG7;Q9ULD0-1;Q9ULD0;Q9ULD0-2;Q9ULD0-3	9	4	4	3.9	117.66	1038	5.5541e-08	0.14245	10122000	4115400	6006900
15S Mg(2+)-ATPase p97 subunit;Transitional endoplasmic reticulum ATPase;Valosin-containing protein;VCP protein;Putative uncharacterized protein DKFZp434K0126	VCP;DKFZp434K0126	Transitional endoplasmic reticulum ATPase	P55072;Q0IIN5;Q96IF9;Q9HAP0;Q9HAP1;Q9NTC4	6	9	9	11.9	89.321	806	1.8045e-48	0.1426	24268000	18457000	5810900
Calcineurin B homolog;Calcineurin homologous protein;Calcium-binding protein CHP;Calcium-binding protein p22;cDNA FLJ57188, highly similar to Calcium-binding protein p22	CHP	Calcium-binding protein p22;cDNA FLJ57188, highly similar to Calcium-binding protein p22	Q99653;B4DSB5	2	3	3	15.9	22.456	195	1.3187e-10	0.14294	3827800	2068700	1759000
35-beta calcimedin;Annexin A4;Annexin IV;Annexin-4;Carbohydrate-binding protein p33/p41;Chromobindin-4;Endonexin I;Lipocortin IV;P32.5;Placental anticoagulant protein II;PP4-X;Protein II;cDNA FLJ52120, highly similar to Annexin A4;ANXA4 protein;cDNA, FLJ96576, Homo sapiens annexin A4 (ANXA4), mRNA;Proliferation-inducing protein 28;Putative uncharacterized protein ANXA4;cDNA FLJ52218, highly simil…	ANX4;ANXA4;hCG_39482;PIG28;DKFZp686H02120	annexin A4;cDNA FLJ51794, highly similar to Annexin A4	P09525;B4DE02;Q6LES2;B4DDF9;B4DDZ4;B4E1S2;Q59FK3;Q6MZI0;Q6P452	2	5	4	14.6	36.085	321	5.6318e-22	0.14458	7537600	5313100	2224500
Inhibitor of nuclear factor kappa-B kinase-interacting protein	IKBIP;IKIP	Isoform 4 of Inhibitor of nuclear factor kappa-B kinase-interacting protein	Q70UQ0-4;Q70UQ0	1	5	4	13.5	43.083	377	9.9191e-28	0.1457	8145400	5007600	3137700
Guanine deaminase;Guanine aminohydrolase;p51-nedasin;cDNA FLJ40221 fis, clone TESTI2021736, highly similar to Guanine deaminase (EC 3.5.4.3);cDNA FLJ60569, highly similar to Guanine deaminase (EC 3.5.4.3);cDNA FLJ57145, highly similar to Guanine deaminase (EC 3.5.4.3);cDNA, FLJ78887, highly similar to Guanine deaminase (EC 3.5.4.3)	GDA;RP11-63P12.1-004;GAH;KIAA1258;RP11-63P12.1-002	Guanine aminohydrolase;Guanine deaminase;Uncharacterized protein;cDNA, FLJ78887, highly similar to Guanine deaminase	Q5SZC3;Q9H335;Q9Y2T3;E9PBR2;Q5SZC6;B3KUM3;B4DIP8;B4DTY5	4	2	2	4.2	52.836	471	2.2552e-17	0.14647	5624000	3265100	2358900
Heat shock 86 kDa;Heat shock protein HSP 90-alpha;Renal carcinoma antigen NY-REN-38;Full-length cDNA 5-PRIME end of clone CS0DN005YI08 of Adult brain of Homo sapiens (human);Hsp89-alpha-delta-N;HSP90AA1 protein;Full-length cDNA clone CS0CAP007YF18 of Thymus of Homo sapiens (human)	HSP90A;HSP90AA1;HSPC1;HSPCA	Isoform 2 of Heat shock protein HSP 90-alpha;Isoform 1 of Heat shock protein HSP 90-alpha;Full-length cDNA clone CS0CAP007YF18 of Thymus of Homo sapiens	P07900-2;P07900;Q86SX1;P07900-1;O75322;Q2VPJ6;Q8TBA7;Q96HX7;Q86U12	5	17	7	20	98.16	854	4.1308e-232	0.14652	70300000	47418000	22882000
Cytosolic thyroid hormone-binding protein;Opa-interacting protein 3;p58;Pyruvate kinase 2/3;Pyruvate kinase isozymes M1/M2;Pyruvate kinase muscle isozyme;Thyroid hormone-binding protein 1;Tumor M2-PK;Pyruvate kinase;Pyruvate kinase M2	OIP3;PK2;PK3;PKM;PKM2	Isoform M2 of Pyruvate kinase isozymes M1/M2;pyruvate kinase isozymes M1/M2 isoform c;pyruvate kinase isozymes M1/M2 isoform f;Isoform M1 of Pyruvate kinase isozymes M1/M2;pyruvate kinase isozymes M1/M2 isoform e;Pyruvate kinase;pyruvate kinase isozymes M1	P14618-1;P14618;P14618-2;B4DRT3;E7EUQ8;B4DUU6;B4DNK4;E9PF79;Q8WUW7;Q9NYI7;Q9UK31;Q9UKK4	15	16	16	31.1	57.936	531	7.084e-171	0.14753	454940000	365290000	89655000
Malate dehydrogenase;Cytosolic malate dehydrogenase;Malate dehydrogenase, cytoplasmic;Putative uncharacterized protein MDH1	MDH1;MDHA	malate dehydrogenase, cytoplasmic isoform 1;Malate dehydrogenase, cytoplasmic;malate dehydrogenase, cytoplasmic isoform 3	B7Z3I7;C9JF79;P40925;B4DUN2;B9A041	6	5	5	16.5	38.627	352	2.815e-47	0.15027	21160000	16420000	4739900
Lysyl hydroxylase 3;Procollagen-lysine,2-oxoglutarate 5-dioxygenase 3;cDNA PSEC0016 fis, clone NT2RM1001076, highly similar to Procollagen-lysine,2-oxoglutarate 5-dioxygenase 3 (EC 1.14.11.4);Putative uncharacterized protein DKFZp564O1822	PLOD3;DKFZp564O1822	Procollagen-lysine,2-oxoglutarate 5-dioxygenase 3;Protein;Protein	O60568;B3KQQ3;Q9UG85	4	3	3	4.3	84.784	738	5.3067e-27	0.15152	8186500	3290000	4896500
Fumarate hydratase, mitochondrial;cDNA, FLJ92753, Homo sapiens fumarate hydratase (FH), nuclear gene encodingmitochondrial protein, mRNA;Fumarate hydratase;Fumarate hydratase, isoform CRA_c	FH;hCG_40671;RP11-527D7.2-001	Isoform Mitochondrial of Fumarate hydratase, mitochondrial;Isoform Cytoplasmic of Fumarate hydratase, mitochondrial	P07954-1;P07954;B1ANK7;P07954-2	4	16	16	30.8	54.636	510	1.365e-103	0.15224	222200000	177360000	44847000
70 kDa lamin;Lamin-A/C;Renal carcinoma antigen NY-REN-32;Lamin A/C transcript variant 1;Lamin A/C;Progerin;LMNA protein;Rhabdomyosarcoma antigen MU-RMS-40.12;cDNA FLJ56081, highly similar to Lamin-A/C;cDNA FLJ55771, highly similar to Lamin-A/C	LMN1;LMNA;RP11-54H19.1-004;RP11-54H19.1-003;RP11-54H19.1-006;RP11-54H19.1-007	Isoform A of Prelamin-A/C;Isoform ADelta10 of Prelamin-A/C;Progerin;Isoform C of Prelamin-A/C;Rhabdomyosarcoma antigen MU-RMS-40.12;Lamin A/C;cDNA FLJ56081, highly similar to Lamin-A/C;Uncharacterized protein;Lamin A/C (Fragment);Lamin A/C;21 kDa protein	P02545-1;P02545;Q5I6Y4;Q5I6Y6;P02545-3;Q6UYC3;P02545-2;Q5I6Y5;Q8N519;Q3BDU5;Q5TCJ4;B4DI32;E7EUI9;D6RAQ3;Q5TCI9;B4DFR3;Q5TCI8	11	11	11	16.1	74.139	664	1.7592e-75	0.15255	60757000	44326000	16431000
cDNA FLJ54957, highly similar to Transketolase (EC 2.2.1.1);Transketolase;Transketolase variant;cDNA FLJ56274, highly similar to Transketolase (EC 2.2.1.1);cDNA FLJ32530 fis, clone SMINT2000185, highly similar to TRANSKETOLASE (EC 2.2.1.1);cDNA FLJ53217, highly similar to Transketolase (EC 2.2.1.1)	TKT	cDNA FLJ54957, highly similar to Transketolase;Transketolase;cDNA FLJ56274, highly similar to Transketolase;cDNA FLJ53217, highly similar to Transketolase	B4DE31;E7EPA7;P29401;Q53EM5;B4E022;B3KPZ8;B4DVU1	7	17	17	26.6	68.813	631	2.1555e-85	0.15261	317290000	213040000	104250000
Heat shock 70 kDa protein 4;Heat shock 70-related protein APG-2;HSP70RY;cDNA, FLJ79511, highly similar to Heat shock 70 kDa protein 4;cDNA, FLJ79520, highly similar to Heat shock 70 kDa protein 4;cDNA, FLJ79524, highly similar to Heat shock 70 kDa protein 4;cDNA, FLJ79536, highly similar to Heat shock 70 kDa protein 4;cDNA FLJ50510, highly similar to Heat shock 70 kDa protein 4;cDNA FLJ52593, hig…	APG2;HSPA4;HS24/p52;HS24/P52	Heat shock 70 kDa protein 4;HS24/P52;Heat shock protein, 110 kDa	P34932;B0AZS1;B0AZT0;B0AZU6;B4DH02;B4DIZ3;B4DN48;B4DSE8;B4DT47;B4DUS3;B4E0H6;B4E354;Q59GF8;O14992;Q7KYN0;Q9BUK9	3	4	4	5	94.33	840	3.0357e-06	0.15294	9971100	3835400	6135700
Cerebroside sulfate activator protein;Ganglioside GM2 activator;Ganglioside GM2 activator isoform short;GM2-AP;Shingolipid activator protein 3;cDNA, FLJ92855, highly similar to Homo sapiens GM2 ganglioside activator protein (GM2A), mRNA;cDNA FLJ51277, highly similar to Ganglioside GM2 activator;GM2-activator protein;GM2 activator protein	GM2A	Ganglioside GM2 activator;ganglioside GM2 activator isoform 2 precursor;Uncharacterized protein;Protein	P17900;B2R699;B4DQM5;Q14427;Q6LBL5;E5RJD0	4	2	2	8.8	20.838	193	0.15144	0.15449	2245900	1567900	678050
Inhibitor of nuclear factor kappa-B kinase-interacting protein;IKIP protein	IKBIP;IKIP	Isoform 1 of Inhibitor of nuclear factor kappa-B kinase-interacting protein;Isoform 2 of Inhibitor of nuclear factor kappa-B kinase-interacting protein	Q70UQ0-1;Q70UQ0;Q70UQ0-2;Q3B7K3	2	4	3	10.9	39.309	350	2.5386e-16	0.15489	4454400	3224200	1230200
Formylglycinamide ribotide amidotransferase;Formylglycinamide ribotide synthetase;Phosphoribosylformylglycinamidine synthase;cDNA FLJ77779, highly similar to Homo sapiens phosphoribosylformylglycinamidine synthase (FGAR amidotransferase) (PFAS), mRNA;Phosphoribosylformylglycinamidine synthase (FGAR amidotransferase), isoform CRA_b;cDNA FLJ75059, highly similar to Homo sapiens phosphoribosylformyl…	KIAA0361;PFAS;hCG_31283	Phosphoribosylformylglycinamidine synthase;98 kDa protein	O15067;A8K8N7;A8K9T9;B4DJ26	3	10	10	7.2	144.73	1338	3.3703e-35	0.15584	17544000	8149600	9394700
Nodal modulator 2;pM5 protein 2;Nodal modulator 3;pM5 protein 3;Nodal modulator 1;pM5 protein;NOMO2 protein;Putative uncharacterized protein DKFZp547A1913;NOMO3 protein	NOMO2;NOMO3;NOMO1;PM5;DKFZp547A1913	Isoform 1 of Nodal modulator 2;139 kDa protein;139 kDa protein;Nodal modulator 3;Nodal modulator 1;Isoform 2 of Nodal modulator 2;NOMO2 protein;Putative uncharacterized protein DKFZp547A1913;NOMO3 protein	Q5JPE7-1;Q5JPE7;P69849;Q15155;Q5JPE7-2;Q4G177;Q9H049;Q1LZN2	9	4	4	3.6	139.44	1267	8.5611e-09	0.15604	6441800	3823100	2618700
Triosephosphate isomerase;Triose-phosphate isomerase	hCG_25936;TPI1;TPI	triosephosphate isomerase isoform 2;Isoform 1 of Triosephosphate isomerase;Triosephosphate isomerase;Isoform 2 of Triosephosphate isomerase	D3DUS9;Q53HE2;P60174-1;P60174;Q2QD09;B4DUI5;B7Z5D8;P60174-2	4	8	8	31.8	30.791	286	7.2057e-112	0.15692	221900000	184280000	37614000
Foocen;Neurite outgrowth inhibitor;Neuroendocrine-specific protein;Neuroendocrine-specific protein C homolog;Reticulon-4;Reticulon-5;RTN-x;cDNA FLJ54947, highly similar to Reticulon-4;NOGO-A;Putative uncharacterized protein RTN4;Reticulon 4, isoform CRA_a;RTN4;RTN4 isoform B1;RTN4 protein;Reticulon 4, isoform CRA_c;Reticulon 4, isoform CRA_f;RNT4;RTN4 isoform Aa;RTN4 isoform Ab;RTN4 isoform D;RTN…	KIAA0886;My043;NOGO;RTN4;SP1507;Nbla10545;hCG_1784307;Nbla00271;NOGOC	Isoform 1 of Reticulon-4;Isoform 5 of Reticulon-4;Isoform 2 of Reticulon-4;RTN4 protein;Isoform 6 of Reticulon-4;Isoform 4 of Reticulon-4;Reticulon 4, isoform CRA_e;Protein;Nogo-C;Isoform 3 of Reticulon-4	Q9NQC3-1;Q9NQC3;B4DZ44;Q3LIF1;Q9NQC3-5;Q9NQC3-2;Q53R94;Q7L7Q6;Q6IPN0;Q9NQC3-6;Q53RF4;Q8IUA4;Q9NQC3-4;Q3LIF4;D6W5C2;A6XGP7;Q9NQC3-3;Q53SY1;Q7L7Q5	10	3	3	2.4	129.93	1192	2.476e-06	0.15821	54690000	40541000	14149000
Angiotensin-binding protein;Microsomal endopeptidase;Mitochondrial oligopeptidase M;Neurolysin, mitochondrial;Neurotensin endopeptidase;cDNA FLJ76106, highly similar to Homo sapiens neurolysin (metallopeptidase M3 family) (NLN), mRNA;cDNA FLJ39097 fis, clone NTONG2000977, highly similar to Neurolysin, mitochondrial (EC 3.4.24.16);NLN protein;Putative uncharacterized protein DKFZp564F123;cDNA FLJ1…	AGTBP;KIAA1226;NLN;DKFZp564F123	Neurolysin, mitochondrial;70 kDa protein;NLN protein;Uncharacterized protein;cDNA FLJ14696 fis, clone NT2RP2005775, highly similar to NEUROLYSIN	Q9BYT8;A8K9T8;B3KU23;Q9BQD0;E9PCB6;Q8NDD9;Q96K48	6	5	5	6.7	80.651	704	7.7173e-10	0.15857	7683300	3843700	3839600
Protein H105e3;Sterol-4-alpha-carboxylate 3-dehydrogenase, decarboxylating;Putative uncharacterized protein NSDHL	H105E3;NSDHL	Sterol-4-alpha-carboxylate 3-dehydrogenase, decarboxylating;Uncharacterized protein	Q15738;C9JDR0	2	4	4	9.9	41.9	373	1.951e-18	0.15921	21808000	14695000	7112300
56 kDa autoantigen;Annexin A11;Annexin XI;Annexin-11;Calcyclin-associated annexin 50;cDNA FLJ55482, highly similar to Annexin A11;Annexin A11 variant;Annexin A11, isoform CRA_b;cDNA FLJ31545 fis, clone NT2RI2000932, highly similar to Annexin A11;cDNA FLJ44306 fis, clone TRACH2025084, highly similar to Annexin A11;ANXA11 protein;cDNA FLJ58379, highly similar to Annexin A11;cDNA FLJ51518, highly si…	ANX11;ANXA11;hCG_22492;RP11-369J21.10-001	cDNA FLJ55482, highly similar to Annexin A11;cDNA FLJ58379, highly similar to Annexin A11;Uncharacterized protein	P50995;B7Z6L0;Q59EP1;Q5T0G8;Q6ICS0;B4DVE7;B4DPJ2;E9PDK5	8	3	3	5.1	65.596	605	4.0388e-06	0.15989	10080000	7088800	2990900
33 kDa VAMP-associated protein;Vesicle-associated membrane protein-associated protein A;cDNA FLJ78586, highly similar to Homo sapiens VAMP (vesicle-associated membrane protein)-associated protein A, 33kDa (VAPA), mRNA;cDNA, FLJ96653, Homo sapiens VAMP (vesicle-associated membrane protein)-associated protein A, 33kDa (VAPA), mRNA	VAP33;VAPA	Isoform 2 of Vesicle-associated membrane protein-associated protein A;Isoform 1 of Vesicle-associated membrane protein-associated protein A;Similar to Vesicle-associated membrane protein-associated protein A isoform 2	Q9P0L0-2;Q9P0L0;Q9P0L0-1;A8KA83	3	3	2	10.2	32.613	294	5.4184e-14	0.1599	1952800	1235500	717310
CD107 antigen-like family member A;Lysosome-associated membrane glycoprotein 1;cDNA FLJ35079 fis, clone PLACE6005283, highly similar to Lysosome-associated membrane glycoprotein 1;LAMP1 protein variant;cDNA FLJ57633, highly similar to Lysosome-associated membrane glycoprotein 1	LAMP1	Lysosome-associated membrane glycoprotein 1;LAMP1 protein variant (Fragment);cDNA FLJ57633, highly similar to Lysosome-associated membrane glycoprotein 1	P11279;B3KRY3;Q59FZ0;B4DWL3	3	2	2	4.8	44.882	417	5.2941e-13	0.1603	50224000	42316000	7908100
A1 activator;Cerebroside sulfate activator;Co-beta-glucosidase;Component C;Dispersin;Glucosylceramidase activator;Proactivator polypeptide;Protein A;Protein C;Saposin-A;Saposin-B;Saposin-B-Val;Saposin-C;Saposin-D;Sphingolipid activator protein 1;Sphingolipid activator protein 2;Sulfatide/GM1 activator;Prosaposin;Putative uncharacterized protein PSAP;Prosaposin (Variant Gaucher disease and variant…	GLBA;PSAP;SAP1;RP11-472K8.1-002;hCG_1787837;RP11-472K8.1-001	Prosaposin;Isoform Sap-mu-9 of Proactivator polypeptide;Uncharacterized protein;Isoform Sap-mu-0 of Proactivator polypeptide;50 kDa protein	P07602-2;P07602;B1AVU8;C9JIZ6;Q53FJ5;P07602-3;B4DEK5;B4DRB7;Q59EN5;C9J7I6;P07602-1;Q53Y86	6	3	3	5.2	61.692	559	5.2362e-05	0.16055	6075300	4688100	1387200
2-phospho-D-glycerate hydro-lyase;Alpha-enolase;C-myc promoter-binding protein;Enolase 1;MBP-1;MPB-1;Non-neural enolase;Phosphopyruvate hydratase;Plasminogen-binding protein;Enolase	ENO1;ENO1L1;MBPB1;MPB1	Isoform alpha-enolase of Alpha-enolase;Isoform MBP-1 of Alpha-enolase	P06733-1;P06733;A4UCS8;P06733-2;A4QMW8;E2DRY6;Q96GV1;Q9BT62	3	19	18	40.8	47.168	434	6.4705e-276	0.16182	755800000	587670000	168130000
Calgizzarin;Metastatic lymph node gene 70 protein;Protein S100-A11;Protein S100-C;S100 calcium-binding protein A11;cDNA, FLJ92471, highly similar to Homo sapiens S100 calcium binding protein A11 (calgizzarin) (S100A11), mRNA	MLN70;S100A11;S100C	Protein S100-A11	P31949;B2R5H0	1	3	3	27.6	11.74	105	1.3454e-23	0.16241	29592000	24184000	5407400
LDH heart subunit;L-lactate dehydrogenase B chain;Renal carcinoma antigen NY-REN-46;L-lactate dehydrogenase	LDHB;hCG_24788	L-lactate dehydrogenase B chain;L-lactate dehydrogenase	P07195;Q5U077;A8MW50	4	13	11	33.2	36.638	334	9.657e-102	0.16308	447660000	376270000	71388000
Calcium-activated neutral proteinase small subunit;Calcium-dependent protease small subunit;Calcium-dependent protease small subunit 1;Calpain regulatory subunit;Calpain small subunit 1;Calcium-dependent protease small subunit 2;Calpain small subunit 2	CAPN4;CAPNS;CAPNS1;CAPNS2	Calpain small subunit 1;Calpain small subunit 2	P04632;Q96L46	2	4	4	13.4	28.315	268	1.6777e-12	0.16324	27578000	20985000	6593300
Archain 1, isoform CRA_a;Coatomer subunit delta variant 2;Putative uncharacterized protein DKFZp686M09245;Archain;Coatomer subunit delta;Delta-coat protein;Archain 1, isoform CRA_b;cDNA, FLJ92603, Homo sapiens archain 1 (ARCN1), mRNA;Coatomer subunit delta variant 1;cDNA FLJ51620, highly similar to Coatomer subunit delta;ARCN1 protein	ARCN1;hCG_40220;DKFZp686M09245;COPD	Coatomer subunit delta variant 2;Coatomer subunit delta;coatomer subunit delta isoform 2;ARCN1 protein	B0YIW6;Q6MZV5;P48444;B0YIW5;B4E1X2;E9PEU4;Q6P1Q5	4	3	3	5.3	61.626	552	1.5092e-05	0.16361	2921800	1581800	1340000
Malic enzyme 2;NAD-dependent malic enzyme, mitochondrial;Malic enzyme	ME2;hCG_23687	NAD-dependent malic enzyme, mitochondrial;NAD-dependent malic enzyme, mitochondrial isoform 2 precursor	P23368;B2R8J2;Q9BWL6	2	5	5	9.1	65.443	584	9.2087e-69	0.16423	18201000	13953000	4247900
Putative uncharacterized protein DKFZp686M24262;Acyl-Coenzyme A dehydrogenase, C-4 to C-12 straight chain;Acyl-Coenzyme A dehydrogenase, C-4 to C-12 straight chain, isoform CRA_a;Medium-chain specific acyl-CoA dehydrogenase, mitochondrial;cDNA FLJ53936, highly similar to Medium-chain specific acyl-CoA dehydrogenase, mitochondrial (EC 1.3.99.3);cDNA FLJ50422, highly similar to Medium-chain specifi…	DKFZp686M24262;ACADM;hCG_22915;RP4-682C21.1-002	Putative uncharacterized protein DKFZp686M24262;Isoform 2 of Medium-chain specific acyl-CoA dehydrogenase, mitochondrial;Isoform 1 of Medium-chain specific acyl-CoA dehydrogenase, mitochondrial;cDNA, FLJ78845, highly similar to Medium-chain specific acyl-C	Q5HYG7;Q5T4U5;P11310-2;P11310;P11310-1;B4DWX6;B4DVB1;B4DVE0;B7Z9I1;B4DJE7	8	3	3	6.2	50.27	454	0.0019039	0.16714	3503500	2191200	1312300
cDNA FLJ59461, highly similar to Pyruvate dehydrogenase E1 component alpha subunit, somatic form, mitochondrial (EC 1.2.4.1);Mitochondrial PDHA1;Pyruvate dehydrogenase (Lipoamide) alpha 1;cDNA FLJ54787, highly similar to Pyruvate dehydrogenase E1 component alpha subunit, somatic form, mitochondrial (EC 1.2.4.1);PDHE1-A type I;Pyruvate dehydrogenase E1 component subunit alpha, somatic form, mitoch…	PDHA1;RP11-723P2.1-009;RP11-723P2.1-008;PHE1A;PDHA1/LOC79064;RP11-723P2.1-002	pyruvate dehydrogenase E1 component subunit alpha, somatic form, mitochondrial isoform 2 precursor;pyruvate dehydrogenase E1 component subunit alpha, somatic form, mitochondrial isoform 3 precursor;Pyruvate dehydrogenase E1 component subunit alpha, somatic	A5YVE9;Q5JPU1;B7Z3T7;Q5JPT9;P08559;A5YPB6;B2R5P7;Q53GE3;A5PHJ9;B7Z3X5;P78557;Q5JPU3;Q6LCA3;Q99725;Q9UNV7	8	7	7	16.1	47.579	428	5.6881e-28	0.16787	26034000	19565000	6468400
Complex III subunit 1;Core protein I;Cytochrome b-c1 complex subunit 1, mitochondrial;Ubiquinol-cytochrome-c reductase complex core protein 1;cDNA FLJ51625, highly similar to Ubiquinol-cytochrome-c reductase complex coreprotein I, mitochondrial (EC 1.10.2.2);cDNA FLJ52292, highly similar to Ubiquinol-cytochrome-c reductase complex coreprotein I, mitochondrial (EC 1.10.2.2)	UQCRC1	Cytochrome b-c1 complex subunit 1, mitochondrial	P31930;B4DUL5;B4DZB9	3	10	9	21.2	52.645	480	1.7556e-48	0.17203	210250000	167980000	42273000
cDNA, FLJ92537, highly similar to Homo sapiens procollagen-lysine, 2-oxoglutarate 5-dioxygenase (lysine hydroxylase, Ehlers-Danlos syndrome type VI) (PLOD), mRNA;cDNA FLJ59393, highly similar to Procollagen-lysine,2-oxoglutarate5-dioxygenase 1 (EC 1.14.11.4);cDNA, FLJ79184, highly similar to Procollagen-lysine, 2-oxoglutarate 5-dioxygenase 1 (EC 1.14.11.4);Procollagen-lysine 1, 2-oxoglutarate 5-d…	PLOD1;RP5-1077B9.2-005;LLH;PLOD	cDNA, FLJ79184, highly similar to Procollagen-lysine, 2-oxoglutarate 5-dioxygenase 1;Procollagen-lysine,2-oxoglutarate 5-dioxygenase 1;cDNA FLJ53377, highly similar to Procollagen-lysine, 2-oxoglutarate 5-dioxygenase 1	B2R5M9;B4DR87;Q5JXB8;Q02809;B4DGN8	3	2	2	2.6	88.271	774	1.4546e-23	0.1721	4928900	2057600	2871300
Inosine phosphorylase;Purine nucleoside phosphorylase;cDNA FLJ25678 fis, clone TST04067, highly similar to PURINE NUCLEOSIDE PHOSPHORYLASE (EC 2.4.2.1);PRO1837	NP;PNP	cDNA FLJ25678 fis, clone TST04067, highly similar to PURINE NUCLEOSIDE PHOSPHORYLASE	P00491;Q8N7G1;Q9P1G4	1	5	5	17.1	32.551	293	3.4949e-13	0.17363	8479900	4949300	3530500
NAD(P) transhydrogenase, mitochondrial;Nicotinamide nucleotide transhydrogenase;Pyridine nucleotide transhydrogenase;cDNA FLJ61320, highly similar to NAD(P) transhydrogenase, mitochondrial (EC 1.6.1.2);cDNA FLJ57576, highly similar to NAD(P) transhydrogenase, mitochondrial (EC 1.6.1.2)	NNT	NAD(P) transhydrogenase, mitochondrial;Uncharacterized protein	Q13423;Q2TB59;B4DMN9;B4DS88;E9PCX7	7	13	13	11.4	113.89	1086	3.8164e-48	0.1749	71902000	45185000	26718000
Cystatin-A;Cystatin-AS;Stefin-A;cDNA FLJ76406, highly similar to Homo sapiens cystatin A (stefin A) (CSTA), mRNA;CSTA protein;Cystatin A (Stefin A);Putative uncharacterized protein CSTA	CSTA;STF1;STFA;hCG_1779987	Cystatin-A;Uncharacterized protein	P01040;Q6IB90;C9J0E4	2	2	2	24.5	11.006	98	1.0219e-14	0.17577	3439000	2321400	1117600
Caveolin;Caveolin-1	CAV;CAV1;hCG_39088;tcag7.24	Caveolin (Fragment);Isoform Alpha of Caveolin-1;Caveolin;Isoform Beta of Caveolin-1;Caveolin	Q59E85;Q03135-1;Q03135;A9XTE5;Q2TNI1;E9PCT5;Q7Z4F3;Q03135-2;C9JKI3	5	2	2	8.3	25.069	217	0.00024132	0.17673	6279400	3081600	3197800
Adenosylhomocysteinase;S-adenosyl-L-homocysteine hydrolase;AHCY protein;cDNA FLJ52743, highly similar to Adenosylhomocysteinase (EC 3.3.1.1);cDNA, FLJ79079, highly similar to Adenosylhomocysteinase (EC 3.3.1.1)	AHCY;SAHH	Adenosylhomocysteinase;adenosylhomocysteinase isoform 2	P23526;B3KUN3;Q1RMG2	2	9	8	20.8	47.716	432	8.2248e-48	0.17718	47141000	32134000	15008000
60S acidic ribosomal protein P2;Renal carcinoma antigen NY-REN-44;cDNA, FLJ92222, Homo sapiens ribosomal protein, large P2 (RPLP2), mRNA;Ribosomal protein, large, P2, isoform CRA_a;RPLP2 protein	D11S2243E;RPLP2;RPP2;hCG_1778304	60S acidic ribosomal protein P2;Protein	P05387;Q6FG96	3	3	2	32.2	11.665	115	3.7008e-39	0.17868	26136000	20344000	5792800
Tetratricopeptide repeat protein 35;cDNA FLJ76169;KIAA0103 variant	KIAA0103;TTC35	Tetratricopeptide repeat protein 35;Protein	Q15006;A8K4K9;Q53HG5	2	1	1	4	34.833	297	7.4717e-05	0.17957	1993000	1649500	343530
Calpactin I light chain;Calpactin-1 light chain;Cellular ligand of annexin II;p10 protein;p11;Protein S100-A10;S100 calcium-binding protein A10;S100 calcium binding protein A10 (Annexin II ligand, calpactin I, light polypeptide (P11)), isoform CRA_b;S100A10 protein	ANX2LG;CAL1L;CLP11;S100A10;hCG_16920	Protein S100-A10	P60903;D3DV26;Q6FGE5	1	3	3	27.8	11.203	97	0.00061661	0.1816	21179000	16881000	4298700
OCIA domain-containing protein 1;Ovarian carcinoma immunoreactive antigen;Putative uncharacterized protein OCIAD1;cDNA FLJ58028, highly similar to Homo sapiens OCIA domain containing 1 (OCIAD1), mRNA	OCIA;OCIAD1	OCIA domain-containing protein 1 isoform 4;Isoform 1 of OCIA domain-containing protein 1;Uncharacterized protein;Uncharacterized protein;OCIA domain-containing protein 1 isoform 2;Isoform 2 of OCIA domain-containing protein 1;Uncharacterized protein;Unchar	Q9NX40-1;Q9NX40;D6RBN5;D6RDK6;C9K030;Q9NX40-2;B4DND1;D6RIT9;D6RG39;D6RIV2;D6RDK1;D6R9T5;D6RI08	13	2	2	8.4	28.174	250	0.00011271	0.18169	5444200	3918400	1525800
Cathepsin D;Cathepsin D heavy chain;Cathepsin D light chain;Putative uncharacterized protein CTSD	CPSD;CTSD	Cathepsin D;Protein;Uncharacterized protein;30 kDa protein;Uncharacterized protein	P07339;C9JH19;C9J9G3	6	4	4	10.9	44.552	412	6.9401e-41	0.18223	31484000	25123000	6360800
[Acyl-carrier-protein] S-acetyltransferase;[Acyl-carrier-protein] S-malonyltransferase;3-hydroxypalmitoyl-[acyl-carrier-protein] dehydratase;3-oxoacyl-[acyl-carrier-protein] reductase;3-oxoacyl-[acyl-carrier-protein] synthase;Enoyl-[acyl-carrier-protein] reductase;Fatty acid synthase;Oleoyl-[acyl-carrier-protein] hydrolase	FAS;FASN	Fatty acid synthase	P49327	8	41	41	16.3	273.42	2511	3.4164e-207	0.18313	254900000	153550000	101360000
cDNA FLJ76863, highly similar to Homo sapiens stress-induced-phosphoprotein 1 (Hsp70/Hsp90-organizing protein) (STIP1), mRNA;STIP1 protein;Hsc70/Hsp90-organizing protein;Renal carcinoma antigen NY-REN-11;Stress-induced-phosphoprotein 1;Transformation-sensitive protein IEF SSP 3521;cDNA FLJ54451, highly similar to Stress-induced-phosphoprotein 1	STIP1	STIP1 protein;Stress-induced-phosphoprotein 1;cDNA FLJ54451, highly similar to Stress-induced-phosphoprotein 1;27 kDa protein	A8K690;Q3ZCU9;P31948;B4DM70	6	6	6	9.8	68.08	590	3.5214e-17	0.18321	18614000	10038000	8575800
cDNA FLJ53975, highly similar to Acetyl-CoA acetyltransferase, cytosolic (EC 2.3.1.9);Acetyl-CoA acetyltransferase, cytosolic;Acetyl-CoA transferase-like protein;Cytosolic acetoacetyl-CoA thiolase;cDNA FLJ76813, highly similar to Homo sapiens acetyl-Coenzyme A acetyltransferase 2 (acetoacetyl Coenzyme A thiolase), mRNA;Acetyl-CoA acetyltransferase, cytosolic variant	ACAT2;ACTL	cDNA FLJ53975, highly similar to Acetyl-CoA acetyltransferase, cytosolic;Acetyl-CoA acetyltransferase, cytosolic	B7Z233;Q9BWD1;A8K4W5;Q59GW6	2	4	4	8.5	44.642	426	3.2387e-11	0.18408	25024000	17298000	7726800
Associate of Myc 1;C-Myc-binding protein;MYCBP protein	AMY1;MYCBP	C-Myc-binding protein	Q99417;Q6IB68	1	2	2	19.4	11.967	103	0.001661	0.18591	3461400	2982000	479370
ATP synthase subunit beta, mitochondrial;ATP synthase subunit beta	ATP5B;ATPMB;ATPSB	ATP synthase subunit beta, mitochondrial	P06576;Q0QEN7	1	18	18	43.3	56.559	529	1.0997e-223	0.18632	759230000	590280000	168950000
BPG-dependent PGAM 1;Phosphoglycerate mutase 1;Phosphoglycerate mutase isozyme B;Phosphoglycerate mutase;cDNA FLJ53048, highly similar to Phosphoglycerate mutase 1 (EC 5.4.2.1);cDNA FLJ51983, highly similar to Phosphoglycerate mutase 1 (EC 5.4.2.1);cDNA FLJ53061, highly similar to Phosphoglycerate mutase 1 (EC 5.4.2.1);HCG2015269, isoform CRA_c;cDNA, FLJ78809, highly similar to Phosphoglycerate m…	CDABP0006;PGAM1;PGAMA;hCG_2015269;hCG_25778;RP11-452K12.8-001;PGAM2;PGAMM;tcag7.794	Phosphoglycerate mutase 1;cDNA FLJ51983, highly similar to Phosphoglycerate mutase 1;cDNA FLJ53061, highly similar to Phosphoglycerate mutase 1;Phosphoglycerate mutase 2;Phosphoglycerate mutase;Similar to Phosphoglycerate mutase 1;Putative uncharacterized	P18669;F2Z2J9;Q0D2Q6;Q53G35;Q6FHK8;Q6FHU2;Q6P6D7;B4DJA4;B4DKL5;B4DMJ7;B7Z9E5;P15259;A4D2J6;E7EMA8;B7ZW15	8	3	3	10.6	28.804	254	1.1541e-23	0.18671	14346000	10777000	3569000
cDNA FLJ54659, highly similar to Homo sapiens MHC class I polypeptide-related sequence B (MICB), mRNA;cDNA FLJ50341, highly similar to Homo sapiens MHC class I polypeptide-related sequence B (MICB), mRNA;cDNA, FLJ94967, Homo sapiens MHC class I polypeptide-related sequence B (MICB),mRNA;MHC class I polypeptide-related sequence B;MICB protein	DAAP-210H10.1-002;MICB;XXbac-BPG16N22.1-002;DADB-26I14.5-002;DAMA-BMC190B12.6-002;XXbac-BCX205D4.1-002;DAQB-72H16.3-002;DASS-81K16.3-002;DAMA-25N12.5-002;PERB11.2	cDNA FLJ54659, highly similar to Homo sapiens MHC class I polypeptide-related sequence B (MICB), mRNA;cDNA, FLJ94967, Homo sapiens MHC class I polypeptide-related sequence B (MICB),mRNA;43 kDa protein;MHC class I polypeptide-related sequence B precursor;MH	B4DUT9;B7Z8M1;B2RAK2;A2AC57;B0UZ11;Q861E6;Q5RIY5;B0S8B6;Q29980-1;Q29980	11	3	2	6.3	42.563	383	4.6605e-08	0.18698	5148500	2355300	2793300
Heat shock protein 75 kDa, mitochondrial;TNFR-associated protein 1;Tumor necrosis factor type 1 receptor-associated protein;TNF receptor-associated protein 1 variant;TRAP1 protein;cDNA FLJ58608, highly similar to Heat shock protein 75 kDa, mitochondrial;cDNA FLJ33058 fis, clone TRACH1000181, highly similar to Heat shock protein 75 kDa, mitochondrial;TNF receptor-associated protein 1;cDNA FLJ36025…	HSP75;TRAP1	Heat shock protein 75 kDa, mitochondrial;cDNA FLJ58608, highly similar to Heat shock protein 75 kDa, mitochondrial	Q12931;Q53FS6;Q53G55;Q59EK6;Q9BV61;B4DR68;Q5CAQ4;Q8N9Z3	2	16	15	22.6	80.109	704	8.5073e-164	0.18741	77038000	57280000	19759000
Adenylate kinase 3;Adenylate kinase 3 alpha-like 1;GTP:AMP phosphotransferase mitochondrial;cDNA FLJ42834 fis, clone BRCAN2019002, highly similar to GTP:AMP phosphotransferase mitochondrial (EC 2.7.4.10);GTP:AMP phosphotransferase;GTP:ATP phosphotransferase;cDNA FLJ58032, highly similar to GTP:AMP phosphotransferase mitochondrial (EC 2.7.4.10);Adenylate kinase 3, isoform CRA_b;cDNA FLJ40886 fis, …	AK3;AK3L1;AK6;AKL3L;hCG_2011468;RP11-6J24.4-001	GTP:AMP phosphotransferase, mitochondrial;GTP:AMP phosphotransferase, mitochondrial isoform b;GTP:AMP phosphotransferase, mitochondrial isoform c	Q9UIJ7;B3KWD9;Q7Z4Y4;Q7Z531;B4DP58;E7ET30;Q9HC01	3	5	5	23.8	25.565	227	1.4596e-11	0.18815	19653000	15643000	4009600
26 kDa prosomal protein;Macropain beta chain;Multicatalytic endopeptidase complex beta chain;Proteasome chain 3;Proteasome subunit beta type-4;cDNA FLJ56661, highly similar to Proteasome subunit beta type 4 (EC 3.4.25.1)	PROS26;PSMB4	Proteasome subunit beta type-4	P28070;B4DFL3	1	2	2	9.5	29.204	264	0.01871	0.18833	7128600	5454300	1674200
Glucose phosphomutase 1;Phosphoglucomutase-1;cDNA FLJ50439, highly similar to Phosphoglucomutase-1 (EC 5.4.2.2);cDNA FLJ51818, highly similar to Phosphoglucomutase-1 (EC 5.4.2.2);cDNA FLJ50663, highly similar to Phosphoglucomutase-1 (EC 5.4.2.2);Phosphoglucomutase 1;cDNA FLJ50606, highly similar to Phosphoglucomutase-1 (EC 5.4.2.2)	PGM1;phosphoglucomutase 1/ PGM1	Isoform 1 of Phosphoglucomutase-1;cDNA FLJ51818, highly similar to Phosphoglucomutase-1;Isoform 2 of Phosphoglucomutase-1;phosphoglucomutase-1 isoform 3	P36871-1;P36871;B4DDQ8;B4DFP1;P36871-2;B7Z6C2;Q16106;B4DPV0;Q9H1D2	4	6	6	11.6	61.448	562	5.6692e-21	0.19065	14395000	6282900	8112300
Protein S100-A13;S100 calcium-binding protein A13;S100 calcium binding protein A13, isoform CRA_a	S100A13;hCG_1743761	Protein S100-A13	Q99584;D3DV53	1	2	2	20.4	11.471	98	7.9118e-32	0.19088	6865800	4577300	2288500
Isoleucine--tRNA ligase;Isoleucyl-tRNA synthetase, mitochondrial;cDNA FLJ75180, highly similar to Homo sapiens mitochondrial isoleucine tRNA synthetase, mRNA	IARS2	Isoleucyl-tRNA synthetase, mitochondrial	Q9NSE4;A8K5W7	1	3	3	3.2	113.79	1012	5.193e-07	0.19121	6769000	2365700	4403300
B-CK;Creatine kinase B chain;Creatine kinase B-type;cDNA FLJ52237, highly similar to Creatine kinase B-type (EC 2.7.3.2)	CKB;CKBB	Creatine kinase B-type;cDNA FLJ52237, highly similar to Creatine kinase B-type	P12277;B4DP56;E7EUJ8	2	4	4	11.5	42.644	381	2.554e-42	0.19284	11643000	9136800	2506300
Cytosolic NADP-isocitrate dehydrogenase;IDP;Isocitrate dehydrogenase [NADP] cytoplasmic;NADP(+)-specific ICDH;Oxalosuccinate decarboxylase;cDNA, FLJ92536, highly similar to Homo sapiens isocitrate dehydrogenase 1 (NADP+), soluble (IDH1), mRNA;Putative uncharacterized protein IDH1;Isocitrate dehydrogenase 1;Isocitrate dehydrogenase 1 (NADP+), soluble;IDH1 protein;Isocitrate dehydrogenase 1 (NADP+)…	IDH1;PICD;hCG_15937	Isocitrate dehydrogenase [NADP] cytoplasmic;Uncharacterized protein	O75874;B2R5M8;C9J9B5;Q0QER2;Q567U4;Q6FHQ6;Q6FI37;Q6FIA4;C9J4N6	7	7	7	19.3	46.659	414	1.1718e-21	0.19404	17843000	9771300	8071500
Ezrin-radixin-moesin-binding phosphoprotein 50;Na(+)/H(+) exchange regulatory cofactor NHE-RF1;Regulatory cofactor of Na(+)/H(+) exchanger;Sodium-hydrogen exchanger regulatory factor 1;Solute carrier family 9 isoform A3 regulatory factor 1;cDNA, FLJ92860, highly similar to Homo sapiens solute carrier family 9 (sodium/hydrogen exchanger), member 3 regulator 1 (SLC9A3R1), mRNA;cDNA FLJ46618 fis, cl…	NHERF;NHERF1;SLC9A3R1;hCG_29833	Na(+)/H(+) exchange regulatory cofactor NHE-RF1	O14745;B2R6A3;B3KY21	2	3	3	10.1	38.868	358	3.573e-05	0.1948	4908100	2814500	2093600
Protein A1S9;Ubiquitin-activating enzyme E1;Ubiquitin-like modifier-activating enzyme 1;cDNA FLJ53392, highly similar to Ubiquitin-activating enzyme E1;cDNA FLJ40024 fis, clone STOMA2007745, highly similar to UBIQUITIN-ACTIVATING ENZYME E1;cDNA FLJ54582, highly similar to Ubiquitin-activating enzyme E1;Ubiquitin-like modifier activating enzyme 1;Ubiquitin activating enzyme E1	A1S9T;UBA1;UBE1;CTD-2522E6.1-003;CTD-2522E6.1-007;CTD-2522E6.1-004;CTD-2522E6.1-008;CTD-2522E6.1-006;CTD-2522E6.1-005	Ubiquitin-like modifier-activating enzyme 1;cDNA FLJ53392, highly similar to Ubiquitin-activating enzyme E1;Ubiquitin-activating enzyme E1;Ubiquitin-like modifier activating enzyme 1;Ubiquitin-like modifier activating enzyme 1;Ubiquitin-like modifier activ	P22314;B4DL67;E7ERL1;B3KUJ2;B4DDE4;Q5JRR6;Q712V1;Q5JRS0;Q5JRR9;Q5JRS2;Q5JRS3;Q5JRS1	8	2	2	2.2	117.85	1058	0.00093128	0.19485	4941900	1939500	3002300
60 kDa chaperonin;60 kDa heat shock protein, mitochondrial;Chaperonin 60;Heat shock protein 60;HuCHA60;Mitochondrial matrix protein P1;P60 lymphocyte protein;Mitochondrial heat shock 60kD protein 1 variant 1;cDNA FLJ54912, highly similar to 60 kDa heat shock protein, mitochondrial;cDNA FLJ51028, highly similar to 60 kDa heat shock protein, mitochondrial;cDNA FLJ54373, highly similar to 60 kDa hea…	HSP60;HSPD1	60 kDa heat shock protein, mitochondrial;cDNA FLJ51046, highly similar to 60 kDa heat shock protein, mitochondrial;Putative uncharacterized protein HSPD1	P10809;B3GQS7;B7Z4F6;B7Z532;B7Z597;B9VP19;B9VPB4;Q53SE2;B7Z5E7;Q53QD5	9	30	30	48	61.054	573	0	0.19493	4582200000	3522000000	1060200000
L-lactate dehydrogenase;Cell proliferation-inducing gene 19 protein;LDH muscle subunit;L-lactate dehydrogenase A chain;Renal carcinoma antigen NY-REN-59;cDNA FLJ52549, highly similar to L-lactate dehydrogenase A chain (EC 1.1.1.27);Putative uncharacterized protein LDHA	LDHA;PIG19;hCG_96677	L-lactate dehydrogenase A chain isoform 3;Isoform 1 of L-lactate dehydrogenase A chain;L-lactate dehydrogenase;Isoform 2 of L-lactate dehydrogenase A chain;L-lactate dehydrogenase;L-lactate dehydrogenase A chain isoform 4;L-lactate dehydrogenase A chain is	B7Z5E3;P00338-1;P00338;B4DJI1;E9PH51;P00338-2;C9J4M5;D3YTI4;A8MXQ4;B4DKQ2	24	10	8	26	39.837	361	7.4097e-70	0.19595	253820000	196530000	57292000
cDNA FLJ37560 fis, clone BRCOC2000333, highly similar to Succinate dehydrogenase (ubiquinone) flavoprotein subunit, mitochondrial (EC 1.3.5.1);cDNA FLJ55072, highly similar to Succinate dehydrogenase (ubiquinone) flavoprotein subunit, mitochondrial (EC1.3.5.1);Flavoprotein subunit of complex II;Succinate dehydrogenase [ubiquinone] flavoprotein subunit, mitochondrial;cDNA FLJ61478, highly similar …	SDH2;SDHA;SDHF	cDNA FLJ55072, highly similar to Succinate dehydrogenase (ubiquinone) flavoprotein subunit, mitochondrial;Uncharacterized protein;cDNA FLJ61478, highly similar to Succinate dehydrogenase (ubiquinone) flavoprotein subunit, mitochondrial;Uncharacterized prot	B3KT34;B4DJ60;E9PBJ5;D6RFM5;P31040;B4DYN5;Q0QF12;Q59GW8;E9PEF8;Q8IW48	8	6	6	10.6	67.299	616	1.1808e-65	0.19687	53908000	37086000	16822000
Dermcidin isoform 2;DCD-1;Dermcidin;Preproteolysin;Survival-promoting peptide;Proteolysis inducing factor	DCD;AIDD;DSEP;hCG_1820620;PIF	Dermcidin isoform 2;Dermcidin	A5JHP3;P81605;Q53YJ2	2	2	2	18.2	12.414	121	1.4807e-13	0.19777	14897000	10283000	4614100
Succinate dehydrogenase assembly factor 2, mitochondrial;Succinate dehydrogenase subunit 5, mitochondrial	C11orf79;PGL2;SDH5;SDHAF2	Succinate dehydrogenase assembly factor 2, mitochondrial;19 kDa protein;Conserved hypothetical protein;15 kDa protein;15 kDa protein;10 kDa protein	Q9NX18	6	2	2	5.4	19.599	166	0.00038094	0.19784	4678000	3660200	1017800
Cytochrome c oxidase polypeptide Vb;Cytochrome c oxidase subunit 5B, mitochondrial;Cytochrome c oxidase subunit Vb;Putative uncharacterized protein COX5B;COX5B protein	COX5B	Cytochrome c oxidase subunit 5B, mitochondrial	P10606;Q53YB7;Q6FHJ9;Q6FHM4	1	2	2	17.8	13.696	129	5.5856e-06	0.19855	26502000	21352000	5149900
Ribosome-recycling factor, mitochondrial;Ribosome-releasing factor, mitochondrial;cDNA FLJ50230, highly similar to Ribosome recycling factor, mitochondrial;Novel protein similar to mitochondrial ribosome recycling factor isoform 1 (LOC286423)	MRRF;RP1-57A13.2;RP1-57A13.2-001	Isoform 1 of Ribosome-recycling factor, mitochondrial;Isoform 3 of Ribosome-recycling factor, mitochondrial;ribosome-recycling factor, mitochondrial isoform 3 precursor;Isoform 2 of Ribosome-recycling factor, mitochondrial;Novel protein similar to mitochon	Q96E11-1;Q96E11;Q96E11-3;B7Z6P7;Q96E11-2;Q4TT42;Q96E11-4;Q96E11-6;Q96E11-5;Q96E11-7	9	2	2	10.7	29.277	262	8.8976e-11	0.20182	1621800	1341800	279980
Transmembrane emp24 domain-containing protein 5;cDNA FLJ54845, highly similar to Transmembrane emp24 domain-containing protein 5;TMED5 protein;Transmembrane emp24 protein transport domain containing 5	CGI-100;TMED5;UNQ397/PRO733;RP5-976O13.2-005;RP5-976O13.2-004	Transmembrane emp24 domain-containing protein 5;TMED5 protein;transmembrane emp24 domain-containing protein 5 isoform 2 precursor;Transmembrane emp24 protein transport domain containing 5	Q9Y3A6;B4DDR7;Q49AG2;B1AKT4;B1AKT3	4	2	2	8.7	26.005	229	1.0059e-10	0.20185	10116000	4993400	5122800
Abhydrolase domain-containing protein 10, mitochondrial;Putative uncharacterized protein ABHD10	ABHD10	Abhydrolase domain-containing protein 10, mitochondrial;Uncharacterized protein	Q9NUJ1;C9IZX5	2	2	2	9.5	33.932	306	1.2727e-17	0.20245	2159100	1429200	729850
UPF0160 protein MYG1, mitochondrial;Chromosome 12 open reading frame 10;Chromosome 12 open reading frame 10, isoform CRA_b;C12orf10 protein;MSTP024;cDNA FLJ57902, highly similar to Protein MYG1	C12orf10;hCG_23362;MST024	UPF0160 protein MYG1, mitochondrial;cDNA FLJ57902, highly similar to Protein MYG1	Q9HB07;Q86UA3;Q8WYI2;B4DE37;Q96CT6	2	2	2	5.9	42.449	376	3.2754e-08	0.20273	4500400	1914100	2586300
Cytochrome c oxidase polypeptide Va;Cytochrome c oxidase subunit 5A, mitochondrial;Cytochrome c oxidase subunit Va	COX5A	Cytochrome c oxidase subunit 5A, mitochondrial	P20674;Q71UP1	1	5	5	26.7	16.762	150	1.4304e-38	0.20376	118540000	97538000	20997000
cDNA FLJ52271, moderately similar to Ubiquinol-cytochrome c reductase complex 14 kDa protein (EC 1.10.2.2);Complex III subunit 7;Complex III subunit VII;Cytochrome b-c1 complex subunit 7;QP-C;Ubiquinol-cytochrome c reductase complex 14 kDa protein;cDNA, FLJ92016, highly similar to Homo sapiens ubiquinol-cytochrome c reductase binding protein (UQCRB), mRNA	UQBP;UQCRB	cDNA FLJ52271, moderately similar to Ubiquinol-cytochrome c reductase complex 14 kDa protein;Uncharacterized protein;Cytochrome b-c1 complex subunit 7;cytochrome b-c1 complex subunit 7 isoform 2;Uncharacterized protein	B7Z2R2;E5RJU0;P14927;B2R4A2;E5RHG9	5	3	3	18.6	18.737	161	1.7087e-28	0.20388	5547000	4188300	1358700
Protein disulfide isomerase P5;Protein disulfide-isomerase A6;Thioredoxin domain-containing protein 7;cDNA FLJ16143 fis, clone BRAMY2038516, highly similar to Protein disulfide-isomerase A6 (EC 5.3.4.1);cDNA FLJ58023, highly similar to Protein disulfide-isomerase A6 (EC 5.3.4.1);Putative uncharacterized protein PDIA6;cDNA FLJ76201, highly similar to Homo sapiens protein disulfide isomerase family…	PDIA6;TXNDC7;hCG_22033;P5	Isoform 2 of Protein disulfide-isomerase A6;cDNA FLJ16143 fis, clone BRAMY2038516, highly similar to Protein disulfide-isomerase A6;Uncharacterized protein;Isoform 1 of Protein disulfide-isomerase A6;cDNA FLJ58502, highly similar to Protein disulfide-isome	Q15084-2;Q15084;B3KY95;B7Z4M8;B5MBW7;Q15084-1;Q53RC7;B7Z254	5	4	4	11.2	53.9	492	3.3347e-40	0.20475	10651000	8349300	2301500
Putative protein RFPL3S;Ret finger protein-like 3 antisense gene protein	RFPL3S	Putative protein RFPL3S	P0C7P2	1	1	1	10.3	11.738	107	0.012555	0.20504	7611600	6236100	1375500
Translocation protein SEC63 homolog;cDNA FLJ90354 fis, clone NT2RP2003390, highly similar to Translocation protein SEC63 homolog;cDNA FLJ14468 fis, clone MAMMA1000734, highly similar to Translocation protein SEC63 homolog	SEC63;SEC63L	Translocation protein SEC63 homolog;cDNA FLJ14468 fis, clone MAMMA1000734, highly similar to Translocation protein SEC63 homolog	Q9UGP8;B3KQF0;B3KNE7;E7EQH7	4	4	4	4.9	87.996	760	7.9659e-17	0.20579	5378600	2482800	2895800
Oncogene DJ1;Parkinson disease protein 7;Protein DJ-1	PARK7	Protein DJ-1	Q99497	2	8	8	36	19.891	189	2.019e-23	0.20621	90784000	62162000	28622000
Malectin	KIAA0152;MLEC	Malectin;24 kDa protein;17 kDa protein	Q14165	3	1	1	4.5	32.233	292	2.2031e-35	0.20777	2765300	1605600	1159700
Histone H1.3;Histone H1c;Histone H1.4;Histone H1b;Liver histone H1e;Histone 1, H1e;Histone H1e;cDNA, FLJ94268, highly similar to Homo sapiens histone 1, H1e (HIST1H1E), mRNA;Histone cluster 1, H1e;Histone H1.2;Histone H1d;cDNA FLJ76039, highly similar to Homo sapiens histone 1, H1c (HIST1H1C), mRNA;Histone 1, H1c;Histone H1.1	H1F3;HIST1H1D;H1F4;HIST1H1E;hCG_1645742;H1F2;HIST1H1C;hCG_1640485;H1F1;HIST1H1A	Histone H1.3;Histone H1.4;Histone H1.2;Histone H1.1	P16402;P10412;A3R0T7;A3R0T8;B2R984;Q4VB24;P16403;A8K4I2;Q02539	6	4	4	17.6	22.35	221	5.0336e-09	0.20874	19911000	10072000	9838700
Histidine--tRNA ligase;Histidyl-tRNA synthetase, cytoplasmic;Histidyl-tRNA synthetase;cDNA FLJ53452, highly similar to Histidyl-tRNA synthetase (EC 6.1.1.21);cDNA FLJ58554, highly similar to Histidyl-tRNA synthetase (EC 6.1.1.21);cDNA FLJ53703, highly similar to Histidyl-tRNA synthetase (EC 6.1.1.21);cDNA FLJ58562, highly similar to Histidyl-tRNA synthetase (EC 6.1.1.21);cDNA FLJ59476, highly sim…	HARS;HRS;hCG_1782886	Histidyl-tRNA synthetase, cytoplasmic;Uncharacterized protein;cDNA FLJ58554, highly similar to Histidyl-tRNA synthetase;50 kDa protein;cDNA FLJ53703, highly similar to Histidyl-tRNA synthetase;cDNA FLJ58562, highly similar to Histidyl-tRNA synthetase;cDNA	P12081;Q52NV4;D6REN6;B4DHQ1;B4DY73;B4DDD8;B4E1C5;B4DEA2;E7ETE2;B3KWE1;C9JWK3;D6RF05	17	4	4	7.3	57.41	509	6.1075e-32	0.20918	16037000	6353400	9683900
Alpha-MPP;Mitochondrial-processing peptidase subunit alpha;P-55;Peptidase (Mitochondrial processing) alpha;cDNA FLJ59584, highly similar to Mitochondrial-processing peptidase alpha subunit, mitochondrial (EC 3.4.24.64)	INPP5E;KIAA0123;MPPA;PMPCA;hCG_1780842;RP11-413M3.1-001	Mitochondrial-processing peptidase subunit alpha;cDNA FLJ59584, highly similar to Mitochondrial-processing peptidase alpha subunit, mitochondrial	Q10713;Q5SXM9;B4DRK5	5	8	8	14.9	58.252	525	7.9117e-50	0.20921	51585000	22508000	29078000
ATP synthase subunit alpha, mitochondrial;ATP synthase subunit alpha;cDNA FLJ54625, highly similar to ATP synthase subunit alpha, mitochondrial (EC 3.6.3.14)	ATP5A;ATP5A1;ATP5AL2;ATPM	ATP synthase subunit alpha, mitochondrial;ATP synthase subunit alpha;ATP synthase subunit alpha	P25705;A8K092;B4DGW3;B4DY56	21	20	20	34.5	59.75	553	2.2614e-67	0.2111	591200000	433010000	158190000
Beta-MPP;Mitochondrial-processing peptidase subunit beta;P-52;cDNA FLJ10132 fis, clone HEMBA1003046, highly similar to Mitochondrial-processing peptidase subunit beta, mitochondrial (EC 3.4.24.64);PMPCB protein;cDNA FLJ78497;cDNA FLJ33094 fis, clone TRACH2000703, highly similar to Mitochondrial-processing peptidase subunit beta, mitochondrial (EC 3.4.24.64);Putative uncharacterized protein DKFZp5…	MPPB;PMPCB;DKFZp586I1223	Mitochondrial-processing peptidase subunit beta;cDNA FLJ78497;cDNA FLJ33094 fis, clone TRACH2000703, highly similar to Mitochondrial-processing peptidase subunit beta, mitochondrial;cDNA FLJ58513, highly similar to Mitochondrial-processing peptidase subuni	O75439;B3KM34;Q96CP5;A8K1E9;B3KQ85;Q9UG64;B4DM90;E7ERZ4	7	8	7	16.2	54.366	489	1.7519e-53	0.21124	35088000	27014000	8073800
Hemidesmosomal protein 1;Plectin-1;HCG1994702;Plectin isoform 1b;Plectin 1, intermediate filament binding protein 500kDa, isoform CRA_b;Similar to plectin 1, intermediate filament binding protein, 500kD	PLEC1;hCG_1994702;hCG_1994701	Isoform 1 of Plectin;Isoform 2 of Plectin;Isoform 3 of Plectin;Isoform 6 of Plectin;Isoform 5 of Plectin;Isoform 4 of Plectin;Isoform 9 of Plectin;Isoform 8 of Plectin;Isoform 7 of Plectin	Q15149-1;Q15149;Q15149-2;Q15149-3;Q15149-6;Q15149-5;Q8WXV5;Q15149-4;Q15149-9;Q15149-8;Q15149-7;D3DWL0;Q96IE3	9	8	7	1.9	531.78	4684	1.0449e-10	0.21244	2296900	1668700	628220
HIRA-interacting protein 5;NFU1 iron-sulfur cluster scaffold homolog, mitochondrial;Putative uncharacterized protein NFU1	CGI-33;HIRIP5;NFU1	Isoform 1 of NFU1 iron-sulfur cluster scaffold homolog, mitochondrial;Isoform 3 of NFU1 iron-sulfur cluster scaffold homolog, mitochondrial;14 kDa protein;Isoform 2 of NFU1 iron-sulfur cluster scaffold homolog, mitochondrial;Uncharacterized protein;Unchara	Q9UMS0-1;Q9UMS0;Q9UMS0-3;Q9UMS0-2;E9PAQ8;C9JGG7;C9J8Q1	6	2	2	8.7	28.462	254	1.5535e-10	0.21336	2528100	1666300	861850
Putative ubiquitin-conjugating enzyme E2 N-like;Bendless-like ubiquitin-conjugating enzyme;Ubc13;Ubiquitin carrier protein N;Ubiquitin-conjugating enzyme E2 N;Ubiquitin-protein ligase N	UBE2NL;BLU;UBE2N	Putative ubiquitin-conjugating enzyme E2 N-like;Ubiquitin-conjugating enzyme E2 N	Q5JXB2;E9KL27;P61088	2	1	1	7.2	17.377	153	1.5513e-40	0.2149	5027100	2810400	2216700
Endoplasmic reticulum stress-response protein 25;Putative NF-kappa-B-activating protein 156;Transmembrane emp24 domain-containing protein 4;Putative uncharacterized protein TMED4	ERS25;TMED4	Isoform 1 of Transmembrane emp24 domain-containing protein 4;Uncharacterized protein;Isoform 2 of Transmembrane emp24 domain-containing protein 4;Isoform 3 of Transmembrane emp24 domain-containing protein 4	Q7Z7H5-1;Q7Z7H5;C9JUN6;Q7Z7H5-2;Q7Z7H5-3	5	3	3	12.8	25.943	227	9.04e-37	0.21644	17129000	12674000	4455800
Putative uncharacterized protein ACY1;cDNA FLJ60317, highly similar to Aminoacylase-1 (EC 3.5.1.14);Aminoacylase-1;N-acyl-L-amino-acid amidohydrolase;cDNA FLJ60760, highly similar to Aminoacylase-1 (EC 3.5.1.14)	ACY1	Uncharacterized protein;cDNA FLJ60317, highly similar to Aminoacylase-1;Aminoacylase-1;aminoacylase-1 isoform d;aminoacylase-1 isoform b;aminoacylase-1 isoform c;Uncharacterized protein	C9JMV9;B4DNW0;Q03154;B4DPC3;C9J6I6;C9J9D8;C9JWD4;C9JYZ0	7	2	2	3.5	56.435	509	0.0098135	0.21707	1422500	707000	715470
Histone H4	H4/A;H4/B;H4/C;H4/D;H4/E;H4/G;H4/H;H4/I;H4/J;H4/K;H4/M;H4/N;H4/O;H4F2;H4FA;H4FB;H4FC;H4FD;H4FE;H4FG;H4FH;H4FI;H4FJ;H4FK;H4FM;H4FN;H4FO;HIST1H4A;HIST1H4B;HIST1H4C;HIST1H4D;HIST1H4E;HIST1H4F;HIST1H4H;HIST1H4I;HIST1H4J;HIST1H4K;HIST1H4L;HIST2H4;HIST2H4A;HIST2H4B;HIST4H4	Histone H4	P62805;B2R4R0;Q0VAS5;Q6B823	1	4	4	38.8	11.367	103	3.7256e-37	0.21712	27794000	22910000	4884300
3-ketoacyl-CoA thiolase, mitochondrial;Acetyl-CoA acyltransferase;Beta-ketothiolase;Mitochondrial 3-oxoacyl-CoA thiolase;T1;cDNA, FLJ95265, highly similar to Homo sapiens acetyl-Coenzyme A acyltransferase 2 (mitochondrial 3-oxoacyl-Coenzyme A thiolase) (ACAA2), nuclear gene encoding mitochondrial protein, mRNA;cDNA FLJ30111 fis, clone BNGH42000360, highly similar to 3-ketoacyl-CoA thiolase, mitoc…	ACAA2	3-ketoacyl-CoA thiolase, mitochondrial	P42765;B2RB23;B3KNP8	1	10	10	27.2	41.924	397	1.4085e-110	0.21792	281440000	246100000	35344000
FIS1 homolog;Mitochondrial fission 1 protein;Tetratricopeptide repeat protein 11	CGI-135;FIS1;TTC11	Mitochondrial fission 1 protein	Q9Y3D6	1	1	1	8.6	16.937	152	2.7045e-27	0.21899	13696000	11606000	2090500
Putative uncharacterized protein DKFZp564H1664;Dehydrogenase/reductase SDR family member 7;Retinal short-chain dehydrogenase/reductase 4	DKFZp564H1664;CGI-86;DHRS7;DHRS7A;RETSDR4;UNQ285/PRO3448	Uncharacterized protein;Isoform 1 of Dehydrogenase/reductase SDR family member 7;Isoform 2 of Dehydrogenase/reductase SDR family member 7	E7ENR8;Q659E8;Q9Y394-1;Q9Y394;Q9Y394-2	3	3	3	8.5	42.518	375	5.952e-10	0.21954	3423100	2418300	1004900
Membrane-organizing extension spike protein;Moesin;MSN protein	MSN	Moesin	P26038;Q6PJT4	2	13	9	19.4	67.819	577	4.0147e-78	0.22203	102840000	74082000	28756000
Macropain chain Z;Multicatalytic endopeptidase complex chain Z;Proteasome subunit beta type-7;Proteasome subunit Z;Proteasome subunit beta type	PSMB7;Z	Proteasome subunit beta type-7	Q99436;B2RAQ9;E9KL30;Q6IBT1;Q86U62	3	3	3	10.8	29.965	277	0.0004357	0.22269	10280000	6981100	3299000
Dipeptidyl aminopeptidase II;Dipeptidyl peptidase 2;Dipeptidyl peptidase 7;Dipeptidyl peptidase II;Quiescent cell proline dipeptidase	DPP2;DPP7;QPP	Dipeptidyl peptidase 2	Q9UHL4	2	3	3	6.5	54.341	492	2.1732e-24	0.22386	4938000	3052100	1885900
Putative cytochrome b-c1 complex subunit Rieske-like protein 1;Complex III subunit 5;Complex III subunit IX;Cytochrome b-c1 complex subunit 11;Cytochrome b-c1 complex subunit 5;Cytochrome b-c1 complex subunit Rieske, mitochondrial;Rieske iron-sulfur protein;Ubiquinol-cytochrome c reductase 8 kDa protein;Ubiquinol-cytochrome c reductase iron-sulfur subunit	UQCRFSL1;UQCRFS1	Putative cytochrome b-c1 complex subunit Rieske-like protein 1;Cytochrome b-c1 complex subunit Rieske, mitochondrial	P0C7P4;P47985	2	6	6	16.6	30.815	283	6.3138e-08	0.22436	32749000	26150000	6598300
ABPP;Alzheimer disease amyloid protein;Amyloid beta A4 protein;Amyloid intracellular domain 50;Amyloid intracellular domain 57;Amyloid intracellular domain 59;APPI;Beta-amyloid protein 40;Beta-amyloid protein 42;Beta-APP40;Beta-APP42;C31;C80;C83;C99;Cerebral vascular amyloid peptide;Gamma-CTF(50);Gamma-CTF(57);Gamma-CTF(59);Gamma-secretase C-terminal fragment 50;Gamma-secretase C-terminal fragmen…	A4;AD1;APP;APLP2;APPL2	Isoform APP770 of Amyloid beta A4 protein (Fragment);Isoform 1 of Amyloid-like protein 2;Uncharacterized protein;Isoform L-APP752 of Amyloid beta A4 protein (Fragment);Isoform 3 of Amyloid-like protein 2;Isoform APP751 of Amyloid beta A4 protein (Fragment)	P05067-1;P05067;B4DGD0;Q06481-1;Q06481;E9PRN5;P05067-9;Q06481-3;B3KXX9;P05067-8;B4DII8;P05067-7;E9PG40;P05067-6;Q06481-2;P05067-5;P05067-4;B4DJT9;B4DQM1;Q06481-4;B4E3I5;P05067-3;B4DM00;E9PEV0;P05067-10;B4DMD5;B7Z313;E9PEV8;Q9BYY9;B4DTV1;Q06481-5	21	1	1	1	86.942	770	0.0087657	0.22662	4808500	2607900	2200700
cDNA FLJ55574, highly similar to Calnexin;Calnexin;IP90;Major histocompatibility complex class I antigen-binding protein p88;p90;cDNA FLJ54242, highly similar to Calnexin;cDNA FLJ26480 fis, clone KDN05071, highly similar to Calnexin	CANX	cDNA FLJ55574, highly similar to Calnexin;Calnexin;cDNA FLJ54242, highly similar to Calnexin;32 kDa protein;Calnexin (Fragment);Uncharacterized protein	B4DGP8;P27824;B4E2T8;Q16094;D6RGY2;E7ETH2;Q6ZP56	13	10	10	12.3	71.502	627	6.9508e-22	0.22735	81516000	38355000	43161000
CNDP dipeptidase 2;Cytosolic non-specific dipeptidase;Glutamate carboxypeptidase-like protein 1;Peptidase A;cDNA FLJ56358, highly similar to Cytosolic nonspecific dipeptidase;cDNA FLJ54170, highly similar to Cytosolic nonspecific dipeptidase;cDNA FLJ11121 fis, clone PLACE1006139;cDNA FLJ10400 fis, clone NT2RM4000395	CN2;CNDP2;CPGL;PEPA	Isoform 1 of Cytosolic non-specific dipeptidase;Isoform 2 of Cytosolic non-specific dipeptidase	Q96KP4-1;Q96KP4;B4DPF1;B4DV28;Q96KP4-2;Q9NUV1;Q9NW02	3	4	4	7.8	52.878	475	3.1824e-06	0.22808	7745200	4112000	3633200
Cyclophilin F;Peptidyl-prolyl cis-trans isomerase F, mitochondrial;Rotamase F;Peptidyl-prolyl cis-trans isomerase	CYP3;PPIF	Peptidyl-prolyl cis-trans isomerase F, mitochondrial	P30405;B2R6X6	3	3	3	13	22.04	207	0.00010104	0.22813	11726000	6693200	5033100
Aspartate aminotransferase, mitochondrial;Fatty acid-binding protein;Glutamate oxaloacetate transaminase 2;Plasma membrane-associated fatty acid-binding protein;Transaminase A;cDNA FLJ78439, highly similar to Homo sapiens glutamic-oxaloacetic transaminase 2;cDNA FLJ40994 fis, clone UTERU2015640, highly similar to Aspartate aminotransferase, mitochondrial (EC 2.6.1.1);cDNA FLJ55692, highly similar…	GOT2	Aspartate aminotransferase, mitochondrial;Aspartate aminotransferase	P00505;A8K482;B3KUZ8;B4DJA6;E7ERW2	3	21	21	39.8	47.517	430	5.5588e-199	0.22907	1010000000	773040000	237000000
Dolichyl-diphosphooligosaccharide--protein glycosyltransferase 48 kDa subunit;cDNA FLJ55714, highly similar to Dolichyl-diphosphooligosaccharide--protein glycosyltransferase 48 kDa subunit (EC 2.4.1.119);cDNA FLJ52929, highly similar to Dolichyl-diphosphooligosaccharide--proteinglycosyltransferase 48 kDa subunit (EC2.4.1.119)	DDOST;KIAA0115;OK/SW-cl.45;OST48	Dolichyl-diphosphooligosaccharide--protein glycosyltransferase 48 kDa subunit;cDNA FLJ52929, highly similar to Dolichyl-diphosphooligosaccharide--proteinglycosyltransferase 48 kDa subunit	P39656;B4DLI2;B4DJE3;E7EWT1	2	8	8	17.8	50.8	456	8.2111e-80	0.22991	68340000	49610000	18730000
Glyceraldehyde-3-phosphate dehydrogenase;Glyceraldehyde 3-phosphate dehydrogenase	CDABP0047;GAPD;GAPDH;OK/SW-cl.12	Glyceraldehyde-3-phosphate dehydrogenase;Glyceraldehyde-3-phosphate dehydrogenase;Glyceraldehyde-3-phosphate dehydrogenase	P04406;Q0QET7;Q2TSD0;E7EUT4;A4UCT1;E7EPW1;E7EUT5;Q16768;Q5ZEY3	7	13	13	39.4	36.053	335	1.9126e-55	0.23085	735440000	595290000	140150000
Antioxidant protein 1;HBC189;Peroxiredoxin III;Peroxiredoxin-3;Protein MER5 homolog;Thioredoxin-dependent peroxide reductase, mitochondrial;Peroxiredoxin 3 isoform a;Peroxiredoxin 3 isoform a variant;Humer	AOP1;PRDX3;mer5	Thioredoxin-dependent peroxide reductase, mitochondrial;thioredoxin-dependent peroxide reductase, mitochondrial isoform b	P30048;A4UCS5;Q53HC2;E9PH29;Q14579	2	5	5	18.8	27.692	256	1.3593e-22	0.23088	63059000	50207000	12851000
EPB72-like protein 2;Stomatin-like protein 2;cDNA FLJ61039, highly similar to Stomatin-like protein 2;cDNA FLJ27036 fis, clone SLV08019, highly similar to Homo sapiens stomatin (EPB72)-like 2 (STOML2)	HSPC108;SLP2;STOML2	Stomatin-like protein 2;cDNA FLJ61039, highly similar to Stomatin-like protein 2;cDNA FLJ27036 fis, clone SLV08019, highly similar to Homo sapiens stomatin (EPB72)-like 2	Q9UJZ1;B4E1K7;F2Z2I8;Q6ZNW0	3	10	10	26.7	38.534	356	1.0542e-298	0.23104	221430000	149730000	71697000
Fumarylacetoacetate hydrolase domain containing 1;Fumarylacetoacetate hydrolase domain-containing protein 1;YisK-like protein	AC012180.10-003;FAHD1;C16orf36;YISKL	fumarylacetoacetate hydrolase domain-containing protein 1 isoform 1;Isoform 2 of Fumarylacetoacetate hydrolase domain-containing protein 1;Isoform 1 of Fumarylacetoacetate hydrolase domain-containing protein 1	B1AK40;Q6P587-2;Q6P587;Q6P587-1	3	2	2	8.5	27.128	248	0.0001783	0.23198	3492400	2843100	649300
Glucose-6-phosphate isomerase;Autocrine motility factor;Neuroleukin;Phosphoglucose isomerase;Phosphohexose isomerase;Sperm antigen 36	GPI	glucose-6-phosphate isomerase isoform 1;Glucose-6-phosphate isomerase;Glucose-6-phosphate isomerase	B4DE36;B4DG39;P06744;B4DVJ0;E9PC18	6	9	9	14.8	64.324	569	6.2055e-100	0.23275	90620000	72843000	17777000
Superoxide dismutase [Mn], mitochondrial;Superoxide dismutase	SOD2	Superoxide dismutase [Mn], mitochondrial;superoxide dismutase [Mn], mitochondrial isoform A precursor;21 kDa protein;20 kDa protein;12 kDa protein;superoxide dismutase [Mn], mitochondrial isoform B precursor;7 kDa protein	P04179;B3KUK2;Q7Z7M4;Q7Z7M7;Q4ZJI1;Q7Z7M5;Q7Z7M6;B4DL20	13	6	6	17.6	24.722	222	9.4433e-23	0.2331	184900000	131230000	53669000
Mitochondrial outer membrane protein 25;Synaptojanin-2-binding protein	OMP25;SYNJ2BP	SYNJ2BP-COX16 protein isoform 1;SYNJ2BP-COX16 protein isoform 2;SYNJ2BP-COX16 protein isoform 3;Synaptojanin-2-binding protein	P57105	4	2	2	9.9	21.334	191	0.00014945	0.23341	6938900	5349200	1589700
Endoplasmic reticulum resident protein 70;Endoplasmic reticulum resident protein 72;Protein disulfide-isomerase A4	ERP70;ERP72;PDIA4	Protein disulfide-isomerase A4	P13667	11	12	12	22.5	72.932	645	5.0295e-163	0.23455	97958000	69664000	28294000
ACLY variant protein;cDNA FLJ56442, highly similar to ATP-citrate synthase (EC 2.3.3.8);ATP-citrate (pro-S-)-lyase;ATP-citrate synthase;Citrate cleavage enzyme;cDNA FLJ55447, highly similar to ATP-citrate synthase (EC 2.3.3.8);cDNA FLJ37765 fis, clone BRHIP2024742, highly similar to ATP-CITRATE	ACLY variant protein;ACLY	ACLY variant protein;cDNA FLJ56442, highly similar to ATP-citrate synthase;ATP-citrate synthase;cDNA FLJ55447, highly similar to ATP-citrate synthase	Q4LE36;B4DIM0;E7ENH9;P53396;B4E3P0;Q8N9C4	4	25	25	22.3	126.22	1155	3.2303e-233	0.23564	304920000	200750000	104170000
Coiled-coil domain-containing protein 41;Renal carcinoma antigen NY-REN-58;CCDC41 protein	CCDC41	>IPI:IPI00180681.6|SWISS-PROT:Q9Y592-1|ENSEMBL:ENSP00000344655;ENSP00000380911|REFSEQ:NP_001035858;NP_057206|H-INV:HIT000071925 Tax_Id=9606 Gene_Symbol=CCDC41 coiled-coil domain-containing protein 41;>IPI:IPI00796371.2|SWISS-PROT:Q9Y592-2|TREMBL:Q3B787|ENS	Q9Y592-1;Q9Y592;Q9Y592-2;Q3B787	2	1	1	1.1	82.939	701	0.043676	0.23601	31059000	24736000	6323000
Maspin;Peptidase inhibitor 5;Serpin B5;cDNA FLJ57640, highly similar to Serpin B5	PI5;SERPINB5	Isoform 1 of Serpin B5;cDNA FLJ57640, highly similar to Serpin B5	P36952-1;P36952;B4DWS9;E7EMX5	2	2	2	5.3	42.1	375	1.0106e-12	0.23819	8525800	5548600	2977200
4-1BB ligand;Tumor necrosis factor ligand superfamily member 9;cDNA, FLJ94653, highly similar to Homo sapiens tumor necrosis factor (ligand) superfamily, member 9 (TNFSF9), mRNA	TNFSF9	Tumor necrosis factor ligand superfamily member 9	P41273;B2RA14	1	2	2	7.5	26.624	254	4.9096e-10	0.2388	10589000	8478200	2110600
Nuclear distribution protein C homolog;Nuclear migration protein nudC	NUDC	Nuclear migration protein nudC	Q9Y266	3	9	9	28.4	38.242	331	1.0316e-30	0.24065	64296000	34437000	29858000
70 kDa subunit of Ku antigen;ATP-dependent DNA helicase 2 subunit 1;ATP-dependent DNA helicase II 70 kDa subunit;CTC box-binding factor 75 kDa subunit;DNA repair protein XRCC6;Lupus Ku autoantigen protein p70;Thyroid-lupus autoantigen;X-ray repair complementing defective repair in Chinese hamster cells 6;X-ray repair cross-complementing protein 6;cDNA, FLJ96699, highly similar to Homo sapiens thy…	G22P1;XRCC6;CTA-216E10.7-002;hCG_2013151;CTA-216E10.7-005;CTA-216E10.7-004	X-ray repair cross-complementing protein 6;cDNA FLJ31224 fis, clone KIDNE2004305, highly similar to ATP-dependent DNA helicase 2 subunit 1;X-ray repair complementing defective repair in Chinese hamster cells 6;X-ray repair complementing defective repair in	P12956;B2RDN9;B1AHC8;B1AHC9;B4DE32;B4E356;Q6IC76;B1AHC7	4	3	3	5.4	69.842	609	1.9815e-10	0.24117	8287100	5702700	2584300
22 kDa protein;CP-22;Sorcin;V19;Putative uncharacterized protein SRI;cDNA FLJ60640, highly similar to Sorcin	SRI	Sorcin;sorcin isoform b;cDNA FLJ60640, highly similar to Sorcin;Uncharacterized protein	P30626;A8MTH6;B4DKK2;C9J0K6	5	5	5	25.3	21.676	198	9.1081e-20	0.24122	20149000	13180000	6969300
C-4 methylsterol oxidase;Methylsterol monooxygenase;cDNA FLJ50771, highly similar to C-4 methylsterol oxidase (EC 1.14.13.72);Putative uncharacterized protein SC4MOL	DESP4;ERG25;SC4MOL	C-4 methylsterol oxidase;C-4 methylsterol oxidase isoform 2	Q15800;A8MYF6	2	1	1	4.8	35.215	293	1.7073e-33	0.24224	3354700	2578900	775790
Septin-8;Putative uncharacterized protein SEPT8;cDNA FLJ58821, highly similar to Septin-6;Septin 6 isoform E;Septin-11;CDC10 protein homolog;Septin-7;cDNA FLJ75185;Predicted protein product of Nbla02942;Putative uncharacterized protein DKFZp686F17268;cDNA FLJ53636, highly similar to Septin-7;cDNA FLJ54551, highly similar to Septin-7;SEPT7 protein;Septin 7;Septin-6;Septin-14;Septin 6;Septin 6, iso…	KIAA0202;SEPT8;SEPT11;CDC10;SEPT7;Nbla02942;DKFZp686F17268;KIAA0128;SEP2;SEPT6;SEPT14;hCG_23191;RP5-876A24.2-002;RP5-876A24.2-004;RP5-876A24.2-003	Isoform 1 of Septin-8;53 kDa protein;cDNA FLJ58821, highly similar to Septin-6;septin-8 isoform c;Uncharacterized protein;Isoform 2 of Septin-11;Isoform 1 of Septin-7;Isoform 2 of Septin-7;Uncharacterized protein;51 kDa protein;Isoform II of Septin-6;Uncha	Q92599-1;Q92599;C9J9B6;B4DZW0;E7ETH8;Q6B514;A6NFQ9;Q9NVA2-2;Q9NVA2;Q16181-1;Q16181;A8K3D0;Q3LIE9;Q16181-2;A4GYY8;B4DPQ6;B4DUD6;E7ES33;Q3B7A3;Q8TC62;E7EPK1;Q14141-1;Q14141;D6RER5;Q6ZU15;B1AMS2;A6NMH6;Q92599-2;B7ZVZ1;Q9NVA2-1;E9KL32;Q96KC0;Q14141-4;Q548C9;Q6NT82;Q14141-2;Q541S4;D6RGI3;B4DPT4;E7EX37;B4DNE4;Q59EY4;D6RDU5;B4E049;Q92599-3;Q14141-3;C9JV02	29	1	1	1.9	55.756	483	0.053225	0.24384	2641200	1123800	1517400
30 kDa prosomal protein;Macropain subunit C2;Multicatalytic endopeptidase complex subunit C2;Proteasome component C2;Proteasome nu chain;Proteasome subunit alpha type-1;Proteasome subunit alpha type	HC2;NU;PROS30;PSC2;PSMA1	Isoform Long of Proteasome subunit alpha type-1;Isoform Short of Proteasome subunit alpha type-1;27 kDa protein	P25786-2;P25786;Q53YE8;P25786-1	3	2	2	7.1	30.239	269	0.0049777	0.24415	7277400	5674700	1602700
cDNA, FLJ92198, highly similar to Homo sapiens Niemann-Pick disease, type C2 (NPC2), mRNA;cDNA FLJ59142, highly similar to Epididymal secretory protein E1;Niemann-Pick disease, type C2 variant;Epididymal secretory protein E1;Human epididymis-specific protein 1;Niemann-Pick disease type C2 protein;cDNA FLJ51947, highly similar to Epididymal secretory protein E1	HE1;NPC2	cDNA FLJ59142, highly similar to Epididymal secretory protein E1;Epididymal secretory protein E1;cDNA FLJ51947, highly similar to Epididymal secretory protein E1	B2R4S5;B4DV10;E7EMS2;Q53HV6;P61916;B4DQV7	3	2	2	9.5	22.409	201	1.0411e-05	0.24427	5337000	3275700	2061400
Beta-hexosaminidase subunit beta;Beta-hexosaminidase subunit beta chain A;Beta-hexosaminidase subunit beta chain B;Beta-N-acetylhexosaminidase subunit beta;Cervical cancer proto-oncogene 7 protein;N-acetyl-beta-glucosaminidase subunit beta;ENC-1AS	HCC7;HEXB	Beta-hexosaminidase subunit beta;ENC-1AS;Protein;Protein	P07686;Q5URX0	5	8	7	12.4	63.111	556	3.5163e-15	0.24447	47291000	18092000	29199000
Leucine-rich repeat-containing protein 59;cDNA, FLJ95955	LRRC59;PRO1855	Leucine-rich repeat-containing protein 59	Q96AG4;B2RE83	1	3	3	9.4	34.93	307	4.5004e-14	0.2449	9314400	4953100	4361400
Putative uncharacterized protein NUDT5;ADP-sugar pyrophosphatase;Nucleoside diphosphate-linked moiety X motif 5;YSA1H	NUDT5;HSPC115	Uncharacterized protein;ADP-sugar pyrophosphatase;Uncharacterized protein;Uncharacterized protein;Uncharacterized protein	A6NFX8;Q9UKK9;A6NHE8;A6NJU6;A6NCQ0	7	3	3	14.2	25.895	232	1.3389e-15	0.24515	5511100	3798300	1712800
Annexin A1;Annexin I;Annexin-1;Calpactin II;Calpactin-2;Chromobindin-9;Lipocortin I;p35;Phospholipase A2 inhibitory protein;ANXA1 protein;Annexin A1, isoform CRA_a;cDNA FLJ51887, highly similar to Annexin A1	ANX1;ANXA1;LPC1;hCG_17305;RP11-71A24.1-002	Annexin A1;cDNA FLJ51887, highly similar to Annexin A1	P04083;B5BU38;Q05BR2;Q5TZZ9;B4DL19	3	12	12	31.8	38.714	346	1.3267e-121	0.24701	212790000	170860000	41937000
UPF0465 protein C5orf33;cDNA FLJ55867	C5orf33	Isoform 1 of UPF0465 protein C5orf33;Isoform 2 of UPF0465 protein C5orf33;cDNA FLJ55867;Isoform 3 of UPF0465 protein C5orf33	Q4G0N4-1;Q4G0N4;Q4G0N4-2;B7Z8V7;Q4G0N4-3	4	7	7	17.4	49.432	442	3.4546e-48	0.24715	12749000	8596900	4152300
Glutathione S-transferase omega-1;cDNA, FLJ94267, highly similar to Homo sapiens glutathione S-transferase omega 1 (GSTO1), mRNA;Glutathione S-transferase omega 1, isoform CRA_a;Glutathione S-transferase omega 1	GSTO1;GSTTLP28;hCG_21844;RP11-99N20.1-004;RP11-99N20.1-005	Glutathione S-transferase omega-1;glutathione S-transferase omega-1 isoform 3;glutathione S-transferase omega-1 isoform 2	P78417;B2R983;D3DRA3;Q5TA02;Q5TA01	3	3	3	12.9	27.566	241	4.0297e-06	0.24855	7018800	3303600	3715200
Delta(3,5)-Delta(2,4)-dienoyl-CoA isomerase, mitochondrial	ECH1	Delta(3,5)-Delta(2,4)-dienoyl-CoA isomerase, mitochondrial	Q13011	3	8	8	23.5	35.816	328	1.7449e-56	0.2486	147990000	114500000	33485000
Putative uncharacterized protein TOR1AIP1;Torsin-1A-interacting protein 1;Torsin A interacting protein 1	TOR1AIP1;RP11-533E19.1-002	Uncharacterized protein;Isoform 1 of Torsin-1A-interacting protein 1;Torsin A interacting protein 1	A8MUM5;Q5JTV8-1;Q5JTV8;E9PD36;B1AMI8	3	1	1	2	67.821	599	1.702e-07	0.24965	1890100	1194400	695690
Acetoacetyl-CoA thiolase;Acetyl-CoA acetyltransferase, mitochondrial;T2	ACAT;ACAT1;MAT	Acetyl-CoA acetyltransferase, mitochondrial	P24752	4	9	9	22.7	45.199	427	2.9549e-220	0.25061	100300000	75388000	24910000
Histone H2A.Z;H2A.F/Z;Histone H2A.V;Histone H2A;Histone H2A.J;Histone H2A.x;Histone H2A type 1-A;Histone H2A/r;Histone H2A type 1;Histone H2A/p;Histone H2A type 1-B/E;Histone H2A.2;Histone H2A/a;Histone H2A/m;Histone H2A type 1-D;Histone H2A.3;Histone H2A/g;Histone H2A type 1-C;Histone H2A/l;Histone H2A type 2-A;Histone H2A/o;Histone H2A type 2-B;Histone H2A type 3;Histone H2A type 2-C;Histone H2…	H2AFZ;H2AZ;H2AFV;H2AV;hCG_19242;H2AFJ;H2AFX;H2AX;H2AFR;HIST1H2AA;H2AFC;H2AFD;H2AFI;H2AFN;H2AFP;HIST1H2AG;HIST1H2AI;HIST1H2AK;HIST1H2AL;HIST1H2AM;hCG_1640463;hCG_1640467;hCG_1641458;hCG_1643754;hCG_1743060;H2AFA;H2AFM;HIST1H2AB;HIST1H2AE;hCG_1640984;hCG_1787383;H2AFG;HIST1H2AD;H2AFL;HIST1H2AC;H2AFO;HIST2H2AA;HIST2H2AA3;HIST2H2AA4;HIST2H2AB;HIST3H2A;H2AFQ;HIST2H2AC;HIST1H2AH;hCG_1640359;H2AFE;HIST1…	Histone H2A.Z;Histone H2A.V;Histone H2A;histone H2A.V isoform 2;Histone H2A;Isoform 2 of Histone H2A.J;Histone H2A.x;Histone H2A type 1-A;Histone H2A type 1;Histone H2A type 1-B/E;Histone H2A type 1-D;Histone H2A type 1-C;Histone H2A type 2-A;Histone H2A t	P0C0S5;Q71UI9;C9J0D1;A6NN01;C9JE22;Q9BTM1-2;Q9BTM1;P16104;Q96QV6;P0C0S8;A4FTV9;P04908;B2R5B3;B2R5B6;Q08AJ9;P20671;Q93077;Q6FI13;Q8IUE6;Q7L7L0;Q16777;Q9BTM1-1;Q96KK5;A3KPC7;Q99878;A6NKY0;A6NFA8;C9J386;A8MQC5	23	2	2	14.8	13.553	128	8.6937e-05	0.25078	18747000	15894000	2853400
Macropain delta chain;Multicatalytic endopeptidase complex delta chain;Proteasome delta chain;Proteasome subunit beta type-6;Proteasome subunit Y;Proteasome subunit beta type	LMPY;PSMB6;Y;hCG_32695	Proteasome subunit beta type-6	P28072;Q6IAT9	1	4	4	16.7	25.357	239	1.1818e-22	0.25079	33752000	16158000	17594000
Macropain subunit C3;Multicatalytic endopeptidase complex subunit C3;Proteasome component C3;Proteasome subunit alpha type-2;Proteasome subunit alpha type	HC3;PSC3;PSMA2	Proteasome subunit alpha type-2	P25787;Q53GF5	1	1	1	4.7	25.898	234	6.8824e-05	0.25391	5197300	4070900	1126300
Cytovillin;Ezrin;p81;Villin-2;cDNA, FLJ92973, highly similar to Homo sapiens villin 2 (ezrin) (VIL2), mRNA;cDNA FLJ53435, highly similar to Ezrin;cDNA FLJ54141, highly similar to Ezrin;cDNA, FLJ78930, highly similar to Ezrin;Cytovillin 2	EZR;VIL2	Ezrin;cDNA FLJ54141, highly similar to Ezrin	P15311;B2R6J2;E7EQR4;Q6NUR7;B7Z437;B7Z5V2;B7Z9R6;Q9UJZ2;Q9UJZ6;Q9UJZ7;Q9UJZ8;Q9UK20	8	12	8	16.4	69.412	586	4.9684e-24	0.2552	20460000	14342000	6118300
HCNPpp;Hippocampal cholinergic neurostimulating peptide;Neuropolypeptide h3;Phosphatidylethanolamine-binding protein 1;Prostatic-binding protein;Raf kinase inhibitor protein	PBP;PEBP;PEBP1	Phosphatidylethanolamine-binding protein 1	P30086;D9IAI1	2	3	3	16.6	21.057	187	6.2601e-15	0.25818	10736000	8055200	2680900
ATP synthase-coupling factor 6, mitochondrial	ATP5A;ATP5J;ATPM;hCG_2007844	ATP synthase-coupling factor 6, mitochondrial isoform b precursor;ATP synthase-coupling factor 6, mitochondrial;ATP synthase-coupling factor 6, mitochondrial	P18859;Q6IB54;Q6NZ59;A8MUH2	3	3	3	37.1	13.388	116	4.2923e-27	0.25903	9673800	7876100	1797700
Synaptic vesicle membrane protein VAT-1 homolog;cDNA, FLJ79487, highly similar to Synaptic vesicle membrane protein VAT-1homolog;cDNA FLJ54106, moderately similar to Synaptic vesicle membrane protein VAT-1 homolog (EC 1.-.-.-);cDNA FLJ39753 fis, clone SMINT2018343, highly similar to Synaptic vesicle membrane protein VAT-1homolog (EC 1.-.-.-)	VAT1	Synaptic vesicle membrane protein VAT-1 homolog;cDNA FLJ54106, moderately similar to Synaptic vesicle membrane protein VAT-1 homolog;cDNA FLJ39753 fis, clone SMINT2018343, highly similar to Synaptic vesicle membrane protein VAT-1homolog	Q99536;B0AZP7;B4DPX4;B3KUF8	6	4	4	12	41.92	393	5.4042e-20	0.25952	11560000	6958600	4600900
Intercellular adhesion molecule 1;Major group rhinovirus receptor;cDNA FLJ53631, highly similar to Intercellular adhesion molecule 1;Intercelular adhesion molecule 1;Cell surface glycoprotein;cDNA FLJ53641, highly similar to Intercellular adhesion molecule 1;cDNA FLJ53671, highly similar to Intercellular adhesion molecule 1	ICAM1;ICAM-1;P3.58	Intercellular adhesion molecule 1;Uncharacterized protein;cDNA FLJ53671, highly similar to Intercellular adhesion molecule 1	P05362;B4DNT6;O00177;Q15463;Q5NKV8;B4DQW5;E9PER2;B4DW82;E7ESS4	5	8	8	16	57.825	532	6.1014e-25	0.25981	152490000	23438000	129060000
HLA-DR-associated protein II;Inhibitor of granzyme A-activated DNase;PHAPII;Phosphatase 2A inhibitor I2PP2A;Protein SET;Template-activating factor I;Putative uncharacterized protein SET;cDNA FLJ51749, highly similar to Protein SET;SET nuclear oncogene;SET translocation (Myeloid leukemia-associated), isoform CRA_a;cDNA, FLJ96345, Homo sapiens SET translocation (myeloid leukemia-associated) (SET),m…	SET;hCG_40357;RP11-216B9.3-001;RP11-216B9.3-003;RP11-216B9.3-010	Isoform 1 of Protein SET;Isoform 2 of Protein SET;SET nuclear oncogene;cDNA FLJ59759, highly similar to Protein SET	Q01105-1;Q01105;A6NGV1;Q5VXV3;Q01105-2;B2RCX0;Q5VXV2;B2REB8;B4DUE2	6	3	3	11.7	33.488	290	6.7068e-60	0.25985	52391000	46846000	5545200
78 kDa glucose-regulated protein;Endoplasmic reticulum lumenal Ca(2+)-binding protein grp78;Heat shock 70 kDa protein 5;Immunoglobulin heavy chain-binding protein	GRP78;HSPA5	78 kDa glucose-regulated protein	P11021	6	26	23	41.1	72.332	654	0	0.26102	688870000	472240000	216630000
Macropain subunit C8;Multicatalytic endopeptidase complex subunit C8;Proteasome component C8;Proteasome subunit alpha type-3;Proteasome subunit alpha type	HC8;PSC8;PSMA3	Isoform 1 of Proteasome subunit alpha type-3;Isoform 2 of Proteasome subunit alpha type-3	P25788-1;P25788;Q6IB71;P25788-2	2	6	6	20.8	28.433	255	5.0903e-23	0.26106	27773000	18422000	9351200
Nucleolin;Protein C23;cDNA FLJ10452 fis, clone NT2RP1000966, highly similar to NUCLEOLIN;Nucleolin, isoform CRA_c;cDNA FLJ38578 fis, clone HCHON2007674, highly similar to NUCLEOLIN;cDNA FLJ45706 fis, clone FEBRA2028457, highly similar to Nucleolin	NCL;hCG_33980	Nucleolin;cDNA FLJ45706 fis, clone FEBRA2028457, highly similar to Nucleolin;32 kDa protein	P19338;B3KM80;B3KTP9;E7EX81;Q6ZS99	7	8	8	9.6	76.613	710	1.7429e-11	0.26123	44032000	24258000	19774000
Basement membrane-specific heparan sulfate proteoglycan core protein;Endorepellin;LG3 peptide;Perlecan;Perlecan proteoglycan 2;HSPG2 protein;Basement membrane-specific heparan sulfate proteoglycan core protein variant	HSPG2	Basement membrane-specific heparan sulfate proteoglycan core protein	P98160;B6EU51;Q2VPA1;Q59EG0	1	1	1	0.3	468.83	4391	0.014905	0.26187	6598200	4280200	2318000
86 kDa subunit of Ku antigen;ATP-dependent DNA helicase 2 subunit 2;ATP-dependent DNA helicase II 80 kDa subunit;CTC box-binding factor 85 kDa subunit;DNA repair protein XRCC5;Ku80;Ku86;Lupus Ku autoantigen protein p86;Nuclear factor IV;Thyroid-lupus autoantigen;X-ray repair complementing defective repair in Chinese hamster cells 5 (double-strand-break rejoining);X-ray repair cross-complementing …	G22P2;XRCC5	X-ray repair cross-complementing protein 5	P13010;Q53T09;Q53TC2	3	4	4	5.3	82.704	732	1.5442e-12	0.26262	9377500	4439100	4938400
Microsomal signal peptidase 22/23 kDa subunit;Signal peptidase complex subunit 3;Signal peptidase complex subunit 3 homolog (S. cerevisiae), isoform CRA_a	SPC22;SPCS3;UNQ1841/PRO3567;hCG_1787020	Signal peptidase complex subunit 3	P61009;D3DP46	1	3	3	15	20.313	180	6.861e-09	0.26293	12910000	9508300	3402000
Protein FAM82B;Regulator of microtubule dynamics protein 1;cDNA FLJ59260, highly similar to Protein FAM82B;cDNA FLJ53118, highly similar to Protein FAM82B;Putative uncharacterized protein FAM82B	CGI-90;FAM82B	Regulator of microtubule dynamics protein 1;cDNA FLJ53118, highly similar to Protein FAM82B;Uncharacterized protein;Uncharacterized protein;Protein;Protein;Protein;Protein;Uncharacterized protein	Q96DB5;B4DNF5;B4DZW6;E7EVI2;E5RH53;E5RGC8	9	2	2	6.4	35.808	314	0.0044751	0.26307	1352200	759820	592340
Alpha-glucosidase 2;Glucosidase II subunit alpha;Neutral alpha-glucosidase AB;cDNA FLJ61290, highly similar to Neutral alpha-glucosidase AB;cDNA FLJ54057, highly similar to Neutral alpha-glucosidase AB;cDNA FLJ59643, highly similar to Neutral alpha-glucosidase AB;cDNA FLJ54035, highly similar to Neutral alpha-glucosidase AB	G2AN;GANAB;KIAA0088	cDNA FLJ61290, highly similar to Neutral alpha-glucosidase AB;Isoform 2 of Neutral alpha-glucosidase AB;96 kDa protein;Uncharacterized protein	Q14697-1;Q14697;B4DJ30;B4DSM6;Q14697-2;B4DZ53;B4DIW2;E9PKU7	8	14	14	14.2	112.92	995	3.7058e-144	0.26433	114980000	72083000	42897000
cDNA FLJ56425, highly similar to Very-long-chain specific acyl-CoAdehydrogenase, mitochondrial (EC 1.3.99.-);Acyl-Coenzyme A dehydrogenase, very long chain variant;Very long-chain specific acyl-CoA dehydrogenase, mitochondrial;Acyl-Coenzyme A dehydrogenase, very long chain, isoform CRA_e;cDNA FLJ31521 fis, clone NT2RI2000255, highly similar to Very-long-chain specific acyl-CoAdehydrogenase, mitoc…	ACADVL;VLCAD;hCG_42007	cDNA FLJ56425, highly similar to Very-long-chain specific acyl-CoAdehydrogenase, mitochondrial;Isoform 1 of Very long-chain specific acyl-CoA dehydrogenase, mitochondrial;Isoform 2 of Very long-chain specific acyl-CoA dehydrogenase, mitochondrial;39 kDa pr	B4DEA8;Q53HR2;P49748-1;P49748;P49748-2;B3KPA6;B3KPX1;B4DEB6	5	3	3	4.9	75.209	701	5.869e-06	0.26509	3028000	2103000	925010
Alanyl aminopeptidase;Aminopeptidase M;Aminopeptidase N;gp150;Microsomal aminopeptidase;Myeloid plasma membrane glycoprotein CD13;cDNA FLJ56120, highly similar to Aminopeptidase N (EC 3.4.11.2);cDNA FLJ55496, highly similar to Aminopeptidase N (EC 3.4.11.2);cDNA FLJ56158, highly similar to Aminopeptidase N (EC 3.4.11.2);Membrane alanine aminopeptidase variant;cDNA FLJ51269, highly similar to Amin…	ANPEP;APN;CD13;PEPN	Aminopeptidase N;cDNA FLJ51269, highly similar to Aminopeptidase N	P15144;B4DP01;B4DPH5;B4DV63;Q59E93;Q71E46;Q8IVL7;B4DP96	2	4	4	4	109.54	967	9.4678e-08	0.26651	4133000	1570600	2562400
UDP--Glc:glycoprotein glucosyltransferase;UDP-glucose ceramide glucosyltransferase-like 1;UDP-glucose:glycoprotein glucosyltransferase 1;cDNA FLJ77398, highly similar to Homo sapiens UDP-glucose ceramide glucosyltransferase-like 1, transcript variant 2, mRNA	GT;UGCGL1;UGGT;UGGT1;UGT1;UGTR	Isoform 1 of UDP-glucose:glycoprotein glucosyltransferase 1;Isoform 2 of UDP-glucose:glycoprotein glucosyltransferase 1	Q9NYU2-1;Q9NYU2;A8KAK1;Q9NYU2-2	4	10	10	6.1	177.19	1555	1.5581e-28	0.268	15898000	8276600	7621900
Apoptosis-linked gene 2 protein;Probable calcium-binding protein ALG-2;Programmed cell death protein 6;Programmed cell death 6 variant;HCG1985580, isoform CRA_f;Programmed cell death 6	ALG2;PDCD6;hCG_1985580	Programmed cell death protein 6;Programmed cell death 6;Protein	O75340;Q53FC3;Q2YDC2	3	2	2	8.9	21.868	191	0.00059838	0.26868	24648000	20048000	4600400
Deoxyguanosine kinase, mitochondrial;Putative uncharacterized protein DGUOK;DGUOK protein	DGK;DGUOK	Isoform 1 of Deoxyguanosine kinase, mitochondrial;Uncharacterized protein;Isoform 5 of Deoxyguanosine kinase, mitochondrial;Isoform 3 of Deoxyguanosine kinase, mitochondrial;Isoform 2 of Deoxyguanosine kinase, mitochondrial;Isoform 4 of Deoxyguanosine kina	Q16854-1;Q16854;E5KSL5;C9JFV8;Q16854-5;Q16854-3;D6W5I0;Q16854-2;E5KSL6;Q9BVK7;Q16854-4	6	1	1	3.2	32.055	277	0.029006	0.26911	1670100	1231300	438840
Complex III subunit 2;Core protein II;Cytochrome b-c1 complex subunit 2, mitochondrial;Ubiquinol-cytochrome-c reductase complex core protein 2	UQCRC2	Cytochrome b-c1 complex subunit 2, mitochondrial	P22695	8	13	13	32	48.442	453	1.231e-169	0.26989	264490000	186590000	77894000
10 kDa chaperonin;10 kDa heat shock protein, mitochondrial;Chaperonin 10;Early-pregnancy factor;Chaperonin 10-related protein;Heat shock 10kDa protein 1 (Chaperonin 10), isoform CRA_b;Putative uncharacterized protein HSPE1	HSPE1;EPFP1;hCG_21429	10 kDa heat shock protein, mitochondrial;Uncharacterized protein	P61604;Q9UNM1;B8ZZL8	6	9	9	76.5	10.932	102	1.2745e-106	0.27439	1990700000	1543700000	446980000
cDNA FLJ56357, highly similar to Homo sapiens apolipoprotein A-I binding protein (APOA1BP), mRNA;Apolipoprotein A-I-binding protein;YjeF N-terminal domain-containing protein 1;Apolipoprotein A-I binding protein;APOA1BP protein	AIBP;APOA1BP;YJEFN1;RP11-284F21.3-002;RP11-284F21.3-004	cDNA FLJ56357, highly similar to Homo sapiens apolipoprotein A-I binding protein (APOA1BP), mRNA;Isoform 1 of Apolipoprotein A-I-binding protein;Apolipoprotein A-I binding protein;Apolipoprotein A-I binding protein;Isoform 2 of Apolipoprotein A-I-binding p	B4DP80;Q8NCW5-1;Q8NCW5;Q5T3I3;Q6PGN4;Q5T3I4;Q8NCW5-2	5	2	2	5.5	33.627	307	0.00029515	0.27471	8155000	5671100	2483800
Macropain subunit C5;Multicatalytic endopeptidase complex subunit C5;Proteasome component C5;Proteasome gamma chain;Proteasome subunit beta type-1;Proteasome beta 1 subunit variant	PSC5;PSMB1	Proteasome subunit beta type-1	P20618;Q53FT8	2	3	3	13.3	26.489	241	3.4823e-16	0.2758	20504000	6457700	14047000
ATP synthase subunit O, mitochondrial;Oligomycin sensitivity conferral protein;ATP synthase	ATP5O;ATPO	ATP synthase subunit O, mitochondrial;Mitochondrial ATP synthase, O subunit variant (Fragment)	P48047;Q53HH2	5	5	5	24.9	23.277	213	2.1385e-56	0.27691	82900000	64905000	17995000
Aromatic esterase 2;Serum aryldialkylphosphatase 2;Serum paraoxonase/arylesterase 2;cDNA FLJ54305, highly similar to Serum paraoxonase/arylesterase 2 (EC 3.1.1.2);cDNA FLJ55597, highly similar to Serum paraoxonase/arylesterase 2 (EC 3.1.1.2);PON2 protein;cDNA FLJ78444, highly similar to Homo sapiens paraoxonase 2, transcript variant 1, mRNA;Paraoxonase 2	PON2;tcag7.307	cDNA FLJ55597, highly similar to Serum paraoxonase/arylesterase 2;serum paraoxonase/arylesterase 2 isoform 1;Isoform 1 of Serum paraoxonase/arylesterase 2;39 kDa protein;serum paraoxonase/arylesterase 2 isoform 2	Q15165-2;Q15165;B4DKM6;B4DW02;Q6PJZ2;Q15165-3;A4D1H7;Q15165-1	6	3	3	8.5	41.528	375	2.2426e-14	0.27812	7276300	3471600	3804800
Macropain epsilon chain;Multicatalytic endopeptidase complex epsilon chain;Proteasome chain 6;Proteasome epsilon chain;Proteasome subunit beta type-5;Proteasome subunit MB1;Proteasome subunit X	LMPX;MB1;PSMB5;X	Isoform 1 of Proteasome subunit beta type-5;Isoform 2 of Proteasome subunit beta type-5;proteasome subunit beta type-5 isoform 2	P28074-1;P28074;P28074-2;E9PAV2	3	5	5	20.2	28.48	263	2.713e-31	0.2785	19262000	8105400	11157000
3,2-trans-enoyl-CoA isomerase, mitochondrial;Delta(3),Delta(2)-enoyl-CoA isomerase;Dodecenoyl-CoA isomerase;DCI protein;Dodecenoyl-Coenzyme A delta isomerase (3,2 trans-enoyl-Coenzyme A isomerase), isoform CRA_a	DCI;hCG_41028	Isoform 1 of Enoyl-CoA delta isomerase 1, mitochondrial;Isoform 2 of Enoyl-CoA delta isomerase 1, mitochondrial	P42126-1;P42126;Q96DC0;P42126-2	2	4	4	13.2	32.816	302	6.1037e-26	0.27953	104110000	85125000	18986000
E2-induced gene 5 protein;Protein FAM162A;Putative uncharacterized protein FAM162A;cDNA FLJ59673, highly similar to Homo sapiens growth and transformation-dependent protein (E2IG5), mRNA	C3orf28;DC16;E2IG5;FAM162A;FWP001	Protein FAM162A;Uncharacterized protein;cDNA FLJ59673, highly similar to Homo sapiens growth and transformation-dependent protein (E2IG5), mRNA	Q96A26;C9JYF2;B4DF97;E9PH05	3	2	2	11.7	17.342	154	0.00011778	0.28241	5723900	4869000	854880
Actin-related protein 2/3 complex subunit 3;Arp2/3 complex 21 kDa subunit;cDNA, FLJ92050, highly similar to Homo sapiens actin related protein 2/3 complex, subunit 3, 21kDa (ARPC3), mRNA;Actin related protein 2/3 complex;cDNA FLJ51245, highly similar to Actin-related protein 2/3 complex subunit 3;Putative uncharacterized protein ARPC3	ARC21;ARPC3	Actin-related protein 2/3 complex subunit 3;cDNA FLJ51245, highly similar to Actin-related protein 2/3 complex subunit 3;Uncharacterized protein	O15145;B2R4D5;Q2LE71;B4DM63;C9JZD1	3	2	2	9.6	20.546	178	0.00086457	0.28266	2828300	1418200	1410100
Protein FAM3C;Putative uncharacterized protein FAM3C	FAM3C;GS3786	Protein FAM3C;Uncharacterized protein;Uncharacterized protein;Uncharacterized protein	Q92520;C9JMN4;C9JP35;C9J2R0	4	4	4	16.3	24.68	227	1.4652e-17	0.28452	7117200	4513400	2603800
Death receptor 5;TNF-related apoptosis-inducing ligand receptor 2;Tumor necrosis factor receptor superfamily member 10B;cDNA FLJ76289, highly similar to Homo sapiens tumor necrosis factor receptor superfamily, member 10b (TNFRSF10B), transcript variant 1, mRNA;TNFRSF10B protein;Tumor necrosis factor receptor superfamily, member 10b;Tumor necrosis factor receptor superfamily, member 10b, isoform C…	DR5;KILLER;TNFRSF10B;TRAILR2;TRICK2;UNQ160/PRO186;ZTNFR9;hCG_1645072;DKFZp686A24188;DKFZp686B23188	Isoform Long of Tumor necrosis factor receptor superfamily member 10B;Isoform Short of Tumor necrosis factor receptor superfamily member 10B;cDNA FLJ52718, highly similar to Homo sapiens tumor necrosis factor receptor superfamily, member 10b, transcript va	O14763-1;O14763;B5BU36;Q6FH58;O14763-2;D3DSR9;B7Z3M7;B7Z588;Q7Z2I8	3	4	4	10.2	47.878	440	1.1091e-33	0.28623	34838000	17710000	17128000
Cytochrome c oxidase polypeptide II;Cytochrome c oxidase subunit 2;Cytochrome c oxidase subunit II	COII;COXII;MTCO2;MT-CO2;COX2;CO2	Cytochrome c oxidase subunit 2	P00403;A0S0W7;A0S2P1;A0S3T1;A0SA07;A1Z455;A1Z4V2;A4ZKZ0;A6YW54;A6YWD1;A6YXV0;A6Z3M5;A6Z6E8;A6ZEU4;A6ZF47;A6ZFK3;A6ZHA9;A7LDC6;A7LF11;A7LFA2;B0Z6W4;B1W855;B2CB37;B2WRY8;B2XHF9;B2XHT9;B2XIR3;B2XL43;B2XP28;B2XPS3;B2YKU2;B3DE06;B3GUF3;B5M7M0;C5H6K5;C5H6K6;C5H6K7;C5H6L3;C5H6M3;C5H6M4;C5H6M5;C5H6M7;C5H6M8;C8XWJ6;C8Y3G4;C8Y3Q5;C8YBL1;C9D661;D1G421;D2IKF4;D2K1G3;D2Y6Y1;D2Y6Y2;D3WYY7;D3WYY8;D3WYY9;D3YPT7;…	1	4	4	15	25.565	227	2.8201e-16	0.28685	19015000	15752000	3262400
Calmodulin;Calmodulin 1 (Phosphorylase kinase, delta), isoform CRA_a;Calmodulin 3 (Phosphorylase kinase, delta), isoform CRA_b;cDNA FLJ61744, highly similar to Calmodulin;CALM3 protein;cDNA FLJ75174, highly similar to Homo sapiens calmodulin 1 (phosphorylase kinase, delta), mRNA;cDNA, FLJ96792, highly similar to Homo sapiens calmodulin 2 (phosphorylase kinase, delta) (CALM2), mRNA;CALM1 protein;C…	CALM;CALM1;CALM2;CALM3;CALML2;CAM;CAM1;CAM2;CAM3;CAMB;CAMC;CAMIII;hCG_20313;hCG_21749;hCG_17033	Uncharacterized protein;Calmodulin;Uncharacterized protein;cDNA FLJ75174, highly similar to Homo sapiens calmodulin 1 (phosphorylase kinase, delta), mRNA;LP7057 protein	E7EMB3;P62158;B4DJ51;E9PCZ7;Q9BRL5;A8K1M2;B2RDW0;E7ETZ0;Q96HY3	9	6	6	21.4	21.689	196	3.1626e-24	0.28748	45739000	36462000	9277200
Nucleoside diphosphate kinase;C-myc purine-binding transcription factor PUF;nm23-H2;Nucleoside diphosphate kinase B	hCG_2001850;NME1-NME2;NM23B;NME2	Nucleoside diphosphate kinase;Isoform 3 of Nucleoside diphosphate kinase B;Uncharacterized protein;Isoform 1 of Nucleoside diphosphate kinase B;Uncharacterized protein	Q32Q12;P22392-2;P22392;E7ERL0;P22392-1;Q6FHN3;E5RHP0	9	9	1	42.5	32.642	292	6.9975e-34	0.28865	7592200	6077200	1514900
cDNA FLJ75245, highly similar to Homo sapiens carbamoyl-phosphate synthetase 1, mitochondrial (CPS1), mRNA;Carbamoyl-phosphate synthetase 1 variant;Carbamoylphosphate synthetase I;Carbamoyl-phosphate synthase [ammonia], mitochondrial;Carbamoyl-phosphate synthetase I;Carbamoyl-phosphate synthetase 1, mitochondrial;Carbamoyl-phosphate synthetase 1, mitochondrial, isoform CRA_a;Putative uncharacteri…	CPS1;hCG_16718	166 kDa protein;carbamoyl-phosphate synthase [ammonia], mitochondrial isoform a precursor;Isoform 1 of Carbamoyl-phosphate synthase [ammonia], mitochondrial;Isoform 2 of Carbamoyl-phosphate synthase [ammonia], mitochondrial	A8K134;Q59HF8;Q5R206;Q5R208;Q5R210;P31327-1;P31327;Q53TL5;Q5R207;Q5R209;P31327-2;B7ZAW0	8	40	40	27.1	165.93	1508	3.3748e-263	0.28909	442870000	248160000	194700000
21 kDa transmembrane-trafficking protein;p24delta;S31III125;Tmp-21-I;Transmembrane emp24 domain-containing protein 10;Transmembrane protein Tmp21;cDNA FLJ52032, highly similar to Transmembrane emp24 domain-containing protein 10;Full-length cDNA 5-PRIME end of clone CS0DF013YM24 of Fetal brain of Homo sapiens (Human) variant;cDNA FLJ53754, highly similar to Transmembrane emp24 domain-containing pr…	TMED10;TMP21	Transmembrane emp24 domain-containing protein 10;cDNA FLJ53754, highly similar to Transmembrane emp24 domain-containing protein 10	P49755;B4DZH3;Q53GF9;B4DL12	2	4	4	20.1	24.976	219	3.2592e-07	0.28943	22692000	16955000	5736300
Diadenosine tetraphosphate synthetase;Glycine--tRNA ligase;Glycyl-tRNA synthetase;Putative uncharacterized protein GARS	GARS	Glycyl-tRNA synthetase	P41250;Q75MN1	2	5	5	6.1	83.165	739	1.2442e-08	0.28955	8620700	3216600	5404100
94 kDa glucose-regulated protein;Endoplasmin;gp96 homolog;Heat shock protein 90 kDa beta member 1;Tumor rejection antigen 1;Tumor rejection antigen (Gp96) 1 variant;Tumor rejection antigen (Gp96) 1;cDNA FLJ58812, highly similar to Endoplasmin (Heat shock protein 90kDa beta member 1);cDNA FLJ58626, highly similar to Endoplasmin (Heat shock protein 90 kDa beta member 1)	GRP94;HSP90B1;TRA1	Endoplasmin;Uncharacterized protein	P14625;Q59FC6;Q5CAQ5;B4DHT9;B4DU71;E9PEX3	6	16	15	18.7	92.468	803	9.7927e-75	0.2902	143030000	83609000	59426000
3-oxoacid-CoA transferase 1;Somatic-type succinyl-CoA:3-oxoacid-CoA-transferase;Succinyl-CoA:3-ketoacid-coenzyme A transferase 1, mitochondrial;Succinyl-CoA:3-ketoacid CoA transferase;cDNA, FLJ92639, highly similar to Homo sapiens 3-oxoacid CoA transferase (OXCT), nuclear geneencoding mitochondrial protein, mRNA;cDNA FLJ51747, highly similar to Succinyl-CoA:3-ketoacid-coenzyme A transferase1, mit…	OXCT;OXCT1;SCOT	Succinyl-CoA:3-ketoacid-coenzyme A transferase 1, mitochondrial;OXCT protein;Uncharacterized protein	P55809;A1E286;B2R5V2;B7Z609;Q6IAV5;E9PDW2	4	11	11	19.8	56.157	520	6.1232e-57	0.29268	266680000	114670000	152010000
Vimentin;Vimentin variant;Vimentin variant 3;cDNA FLJ34494 fis, clone HLUNG2005030, highly similar to VIMENTIN	VIM	Vimentin;Vimentin variant 3	P08670;Q53HU8;B0YJC4;B3KRK8	17	19	16	35.8	53.651	466	4.0833e-64	0.29299	165860000	86788000	79077000
Outer mitochondrial membrane protein porin 1;Plasmalemmal porin;Porin 31HL;Porin 31HM;Voltage-dependent anion-selective channel protein 1;cDNA FLJ38670 fis, clone HSYRA2000190, highly similar to Voltage-dependent anion-selective channel protein 1;Putative uncharacterized protein VDAC1;cDNA FLJ57715, highly similar to Voltage-dependent anion-selective channel protein 1	VDAC;VDAC1	Voltage-dependent anion-selective channel protein 1;Uncharacterized protein;Similar to Voltage-dependent anion-selective channel protein 1;cDNA FLJ57715, highly similar to Voltage-dependent anion-selective channel protein 1	P21796;B3KTS5;C9JI87;B4DEI3;E7ER14	4	6	5	24.4	30.772	283	2.1639e-104	0.29339	161580000	126650000	34925000
Secretory carrier-associated membrane protein 3;SCAMP3 protein	C1orf3;PROPIN1;SCAMP3	Isoform 1 of Secretory carrier-associated membrane protein 3;Isoform 2 of Secretory carrier-associated membrane protein 3	O14828-1;O14828;Q6FHJ5;O14828-2	2	1	1	4.6	38.287	347	2.3182e-77	0.2942	5827600	3287400	2540200
ATP synthase subunit e, mitochondrial	ATP5I;ATP5K	ATP synthase, H+ transporting, mitochondrial F0 complex, subunit E	P56385	1	2	2	23.6	8.3076	72	3.177e-06	0.29462	48457000	34750000	13707000
22 kDa neuronal tissue-enriched acidic protein;Brain acid soluble protein 1;Neuronal axonal membrane protein NAP-22	BASP1;NAP22	Isoform 1 of Brain acid soluble protein 1;Isoform 2 of Brain acid soluble protein 1	P80723-1;P80723;P80723-2	2	5	5	29.1	22.693	227	3.9021e-25	0.29505	38059000	30561000	7497800
Cytochrome c oxidase polypeptide IV;Cytochrome c oxidase subunit 4 isoform 1, mitochondrial;Cytochrome c oxidase subunit IV isoform 1;COX4I1 protein	COX4;COX4I1	Cytochrome c oxidase subunit 4 isoform 1, mitochondrial	P13073;Q86WV2	1	5	5	25.4	19.576	169	5.1611e-27	0.29555	77431000	64079000	13353000
Actin-like protein 3;Actin-related protein 3;ARP3 actin-related protein 3 homolog (Yeast), isoform CRA_a;cDNA, FLJ93049, Homo sapiens ARP3 actin-related protein 3 homolog (yeast) (ACTR3), mRNA;Putative uncharacterized protein ACTR3;ARP3 actin-related protein 3 homolog variant;cDNA FLJ51148, highly similar to Actin-like protein 3;cDNA FLJ52434, highly similar to Actin-like protein 3;cDNA, FLJ79112…	ACTR3;ARP3;hCG_26669;ACTR3B;ARP11;ARP4	Actin-related protein 3;cDNA, FLJ79295, highly similar to Actin-like protein 3;cDNA FLJ51082, highly similar to Actin-like protein 3;cDNA FLJ52521, highly similar to Actin-like protein 3;cDNA FLJ52216, highly similar to Actin-like protein 3;Isoform 1 of Ac	P61158;Q53QM2;Q59FV6;B4DXW1;B4DT29;B4DTI0;B4E1U3;Q9P1U1-1;Q9P1U1;B7Z9W3;Q9P1U1-2;B3KM55;Q59GD5	8	2	2	5	47.371	418	5.9876e-07	0.29714	41093000	3109900	37983000
58 kDa glucose-regulated protein;58 kDa microsomal protein;Disulfide isomerase ER-60;Endoplasmic reticulum resident protein 57;Endoplasmic reticulum resident protein 60;Protein disulfide-isomerase A3;cDNA PSEC0175 fis, clone OVARC1000169, highly similar to Protein disulfide-isomerase A3 (EC 5.3.4.1);cDNA FLJ59460, highly similar to Protein disulfide-isomerase A3 (EC 5.3.4.1);cDNA PSEC0148 fis, cl…	ERP57;ERP60;GRP58;PDIA3	Protein disulfide-isomerase A3;cDNA PSEC0175 fis, clone OVARC1000169, highly similar to Protein disulfide-isomerase A3;cDNA PSEC0148 fis, clone PLACE1007202, highly similar to Protein disulfide-isomerase A3;32 kDa protein	P30101;B3KQT9;B4DDM1;B3KQT2	5	19	14	37.6	56.782	505	4.3347e-167	0.2976	863440000	609050000	254380000
Adenylyl cyclase-associated protein 1;Adenylyl cyclase-associated protein	CAP;CAP1;hCG_2033246;RP11-115D7.1-016;RP11-115D7.1-013;RP11-115D7.1-018;RP11-115D7.1-011;RP11-115D7.1-008;RP11-115D7.1-017;RP11-115D7.1-012;RP11-115D7.1-010;RP11-115D7.1-007	Isoform 1 of Adenylyl cyclase-associated protein 1;Isoform 2 of Adenylyl cyclase-associated protein 1;49 kDa protein;Adenylyl cyclase-associated protein;46 kDa protein;Adenylyl cyclase-associated protein;Adenylyl cyclase-associated protein;Adenylyl cyclase	Q01518-1;Q01518;B2RDY9;B4DI38;B4DNW7;B4DNY3;D3DPU2;Q01518-2;B4DNA3;B4DUZ8;E7ENY9;Q5T0R8;Q5T0R9;Q5T0R1;Q5T0R2;Q5T0R3;Q5T0R4;Q5T0R5;Q5T0R6;Q5T0R7	13	2	2	4	51.901	475	1.0776e-15	0.29801	4421900	3229400	1192500
SYNGR2 protein;Cellugyrin;Synaptogyrin-2	SYNGR2;UNQ352/PRO615	SYNGR2 protein;Synaptogyrin-2	Q3KQZ2;O43760	2	3	3	10.2	30.375	275	1.088e-09	0.29835	17911000	13150000	4760800
Glutathione reductase, mitochondrial;Glutathion reductase delta8 alternative splicing variant;Glutathione reductase;Glutathion reductase delta9 alternative splicing varian;Glutathion reductase delta8+9 alternative splicing variant	GLUR;GRD1;GSR	Isoform Mitochondrial of Glutathione reductase, mitochondrial;glutathione reductase, mitochondrial isoform 2 precursor;Isoform Cytoplasmic of Glutathione reductase, mitochondrial;glutathione reductase, mitochondrial isoform 3 precursor;glutathione reductas	P00390-1;P00390;C8KIL8;P00390-2;Q03504;C8KIL9;C8KIM0;E5RI06	6	6	6	13	56.256	522	4.3805e-72	0.29859	19673000	11187000	8485900
cDNA FLJ51656, highly similar to Actin-like protein 2;Actin-like protein 2;Actin-related protein 2;ACTR2 protein;cDNA FLJ51655, highly similar to Actin-like protein 2	ACTR2;ARP2	actin-related protein 2 isoform a;Actin-related protein 2;39 kDa protein;cDNA FLJ51655, highly similar to Actin-like protein 2	B4DHK9;E9PF41;P61160;Q8IY98;B4DWQ5	4	4	3	9.8	45.376	399	3.6993e-23	0.30169	8658600	6200000	2458600
ES1 protein homolog, mitochondrial;Protein GT335;Protein KNP-I	C21orf33;HES1;KNPI	Isoform Long of ES1 protein homolog, mitochondrial;Protein;Protein;Isoform Short of ES1 protein homolog, mitochondrial;24 kDa protein;Uncharacterized protein;22 kDa protein	P30042-1;P30042;P30042-2;F2Z2Q0	7	3	3	10.4	28.17	268	3.7894e-11	0.30214	33206000	13493000	19713000
Histone H2B;Histone H2B type 1-N;Histone H2B.d;Histone H2B type 1-A;Histone H2B, testis;Testis-specific histone H2B;Histone H2B type 1-C/E/F/G/I;Histone H2B.1 A;Histone H2B.a;Histone H2B.g;Histone H2B.h;Histone H2B.k;Histone H2B.l;HIRA-interacting protein 1;Histone H2B type 1-K;Histone H2B type 1-O;Histone H2B.2;Histone H2B.n;HIRA-interacting protein 2;Histone H2B type 1-D;Histone H2B.1 B;Histone…	H2BFD;HIST1H2BN;HIST1H2BA;TSH2B;H2BFA;H2BFG;H2BFH;H2BFK;H2BFL;HIST1H2BC;HIST1H2BE;HIST1H2BF;HIST1H2BG;HIST1H2BI;hCG_1640484;hCG_1640985;hCG_1641780;hCG_1787353;hCG_1787365;H2BFT;HIRIP1;HIST1H2BK;H2BFN;HIST1H2BO;H2BFB;HIRIP2;HIST1H2BD;H2BFF;HIST1H2BB;H2BFS;H2BFR;HIST1H2BJ;H2BFQ;HIST2H2BE;H2BFC;HIST1H2BL;H2BFJ;HIST1H2BH;H2BFE;HIST1H2BM;HIST2H2BF;HIST3H2BB	Histone H2B;Histone H2B type 1-N;histone H2B type 2-F isoform b;Histone H2B type 1-A;Histone H2B;Histone H2B type 1-C/E/F/G/I;Histone H2B type 1-K;Histone H2B type 1-O;Histone H2B type 1-D;Histone H2B type 1-B;Histone H2B type F-S;Histone H2B type 1-J;Hist	B4DR52;Q99877;B4DLA9;Q96A08;A8K9J7;P62807;B2R4S9;O60814;P23527;P58876;P33778;P57053;P06899;Q16778;Q99880;Q93079;Q99879;Q0D2M2;Q5QNW6;Q8N257	19	2	2	9.6	18.041	166	0.032154	0.30242	66448000	24899000	41550000
LETM1 and EF-hand domain-containing protein 1, mitochondrial;Leucine zipper-EF-hand-containing transmembrane protein 1;Leucine zipper-EF-hand containing transmembrane protein 1, isoform CRA_a	LETM1;hCG_1818300	Isoform 1 of LETM1 and EF-hand domain-containing protein 1, mitochondrial	O95202-1;O95202;D3DVQ1	3	7	6	8.9	83.353	739	6.6011e-33	0.30377	20992000	11865000	9127000
Endoplasmic reticulum resident protein 44;Thioredoxin domain-containing protein 4	ERP44;KIAA0573;TXNDC4;UNQ532/PRO1075	Endoplasmic reticulum resident protein 44	Q9BS26	2	4	3	8.4	46.971	406	1.1142e-20	0.30525	21827000	14968000	6859000
ATP-dependent RNA helicase DDX1;DEAD box protein 1;DEAD box protein retinoblastoma;cDNA, FLJ94573, Homo sapiens DEAD (Asp-Glu-Ala-Asp) box polypeptide 1 (DDX1), mRNA;DEAD (Asp-Glu-Ala-Asp) box polypeptide 1, isoform CRA_d;DEAD box polypeptide 1;cDNA FLJ51017, highly similar to ATP-dependent RNA helicase DDX1 (EC 3.6.1.-);cDNA FLJ51031, highly similar to ATP-dependent RNA helicase DDX1 (EC 3.6.1.-…	DDX1;hCG_15914	ATP-dependent RNA helicase DDX1;cDNA FLJ51031, highly similar to ATP-dependent RNA helicase DDX1;cDNA FLJ57326, highly similar to ATP-dependent RNA helicase DDX1	Q92499;A3RJH1;B4DP70;F1T0B3;B4DPN6;B4DME8	3	2	2	2.6	82.431	740	0.00056171	0.30613	1612300	1052300	560020
Coiled-coil domain-containing protein 134	CCDC134	Coiled-coil domain-containing protein 134	Q9H6E4	1	2	2	9.2	26.56	229	0.043577	0.30626	1037900	563940	473970
Cathepsin L1;Cathepsin L1 heavy chain;Cathepsin L1 light chain;Major excreted protein;cDNA FLJ90619 fis, clone PLACE1002374, highly similar to Cathepsin L (EC 3.4.22.15);Cathepsin L;Cathepsin L, isoform CRA_b;Putative uncharacterized protein;Cathepsin L splice variant;Cathepsin L2;Cathepsin U;Cathepsin V;cDNA, FLJ93235, highly similar to Homo sapiens cathepsin L2 (CTSL2), mRNA;Cathepsin K;Catheps…	CTSL;CTSL1;hCG_30369;RP11-65B23.1-004;CATL2;CTSL2;CTSU;CTSV;UNQ268/PRO305;CTSK;CTSO;CTSO2;hCG_39377;RP11-363I22.4-001;RP11-363I22.4-002;CTSL3	Cathepsin L1;Cathepsin L1;Cathepsin L2;Cathepsin K;Cathepsin K;Putative cathepsin L-like protein 3;Conserved hypothetical protein	P07711;A5PLM9;B3KQK4;Q6LAF7;Q9HBQ7;Q5K630;Q5T8F0;Q8NG13;O60911;B2R717;P43235;Q6FHN2;Q6FHS6;Q5QP40;Q5NE16	7	2	2	4.8	37.564	333	0.10576	0.30627	2453400	1153100	1300300
Calregulin;Calreticulin;CRP55;Endoplasmic reticulum resident protein 60;grp60;HACBP;cDNA FLJ53009, highly similar to Calreticulin;Calreticulin variant	CALR;CRTC	Calreticulin	P27797;B4DHR1;Q53G71	2	9	9	18.7	48.141	417	5.9184e-23	0.30746	218890000	150870000	68020000
C1orf151 protein;UPF0327 protein C1orf151	C1orf151	C1orf151 protein (Fragment);hypothetical protein LOC440574 isoform c;UPF0327 protein C1orf151;hypothetical protein LOC440574 isoform b	Q96G68;Q5TGZ0	4	2	2	48.7	4.414	39	0.00020346	0.30941	7839100	5562300	2276700
p195;Ras GTPase-activating-like protein IQGAP1;IQ motif containing GTPase activating protein 1;IQGAP1 protein;cDNA FLJ55816, highly similar to Ras GTPase-activating-like protein IQGAP1;cDNA FLJ55443, highly similar to Ras GTPase-activating-like protein IQGAP1	IQGAP1;KIAA0051	Ras GTPase-activating-like protein IQGAP1;cDNA FLJ55443, highly similar to Ras GTPase-activating-like protein IQGAP1	P46940;A4QPB0;Q05DN7;Q5FWG8;Q6P1N4;Q96PA3;B4DNP4;B4E2M0	19	28	28	15.7	189.25	1657	2.7016e-55	0.31049	45701000	27346000	18355000
48 kDa TATA box-binding protein-interacting protein;51 kDa erythrocyte cytosolic protein;INO80 complex subunit J;Repressing pontin 52;RuvB-like 2;TIP49b;TIP60-associated protein 54-beta;cDNA FLJ14856 fis, clone PLACE1001054, highly similar to RuvB-like 2 (EC 3.6.1.-);RuvB-like 2 (E. coli), isoform CRA_d;cDNA FLJ32936 fis, clone TESTI2007533, highly similar to RuvB-like 2 (EC 3.6.1.-);RuvB-like 2 …	CGI-46;INO80J;RUVBL2;TIP48;TIP49B;hCG_16214	RuvB-like 2;cDNA FLJ32936 fis, clone TESTI2007533, highly similar to RuvB-like 2;cDNA FLJ56743, highly similar to RuvB-like 2	Q9Y230;B3KNL2;B3KQ59;B4DW30;E7ETE5	3	6	6	16.2	51.156	463	6.9771e-23	0.31174	7469500	4667100	2802400
GrpE protein homolog 1, mitochondrial;HMGE;Mt-GrpE#1;GrpE protein homolog	GREPEL1;GRPEL1	GrpE protein homolog 1, mitochondrial;GrpE protein homolog	Q9HAV7;B4DWV5;E7EWH0	2	7	7	30.9	24.279	217	1.3404e-46	0.31183	54277000	41914000	12362000
Choline phosphatase 3;HindIII K4L homolog;Hu-K4;Phosphatidylcholine-hydrolyzing phospholipase D3;Phospholipase D3;cDNA FLJ59669, highly similar to Homo sapiens phospholipase D family, member 3 (PLD3), transcript variant 1, mRNA	PLD3	Phospholipase D3;cDNA FLJ59669, highly similar to Homo sapiens phospholipase D family, member 3 (PLD3), transcript variant 1, mRNA	Q8IV08;B4DEL6	2	2	2	4.5	54.705	490	4.7465e-08	0.31351	2525100	1110700	1414400
Mitochondrial import receptor subunit TOM40 homolog;p38.5;Protein Haymaker;Translocase of outer membrane 40 kDa subunit homolog	C19orf1;PEREC1;TOM40;TOMM40	Isoform 1 of Mitochondrial import receptor subunit TOM40 homolog;Isoform 2 of Mitochondrial import receptor subunit TOM40 homolog	O96008-1;O96008;O96008-2	3	4	4	11.1	37.893	361	1.7175e-19	0.31656	49294000	35552000	13742000
Phenylalanine--tRNA ligase beta chain;Phenylalanyl-tRNA synthetase beta chain;cDNA FLJ75460, highly similar to Homo sapiens phenylalanine-tRNA synthetase-like, beta subunit, mRNA;cDNA FLJ57266, highly similar to Phenylalanyl-tRNA synthetase beta chain (EC 6.1.1.20);Phenylalanine-tRNA synthetase-like, beta subunit, isoform CRA_c;cDNA, FLJ79396, highly similar to Phenylalanyl-tRNA synthetase beta c…	FARSB;FARSLB;FRSB;HSPC173;hCG_2012454	Phenylalanyl-tRNA synthetase beta chain;55 kDa protein	Q9NSD9;A8K666;B4DFM0;B7ZB32;Q9BR63	2	5	5	8.3	66.115	589	3.8934e-11	0.31759	8366700	5051700	3315000
Toll-like receptor adapter molecule 2 (TICAM-2) (Putative NF-kappa-B- activating protein 502).;Transmembrane emp24 domain-containing protein 7;cDNA FLJ57776, highly similar to Transmembrane emp24 domain-containing protein 7;TMED7 protein;cDNA FLJ90737 fis, clone PLACE1010827, moderately similar to Membrane protein p24B	hCG_37564;TIRAP3;CGI-109;TMED7	TRAM adaptor with GOLD domain isoform 1;Transmembrane emp24 domain-containing protein 7;TRAM adaptor with GOLD domain isoform 2	Q6JUT2;Q9Y3B3;B4E2C1;Q3B7W7;Q8NBU8	3	2	2	4.7	46.172	404	1.0501e-12	0.31932	6286300	4615900	1670400
Malate dehydrogenase, mitochondrial;Malate dehydrogenase;cDNA FLJ52880, highly similar to Malate dehydrogenase, mitochondrial (EC 1.1.1.37);Putative uncharacterized protein MDH2	MDH2	Malate dehydrogenase, mitochondrial;cDNA FLJ52880, highly similar to Malate dehydrogenase, mitochondrial;25 kDa protein	P40926;B3KTM1;Q0QF37;Q6FHZ0;Q75MT9;B4DE44;E9PDB2;Q75MP7	9	18	18	55.6	35.503	338	2.0384e-128	0.32009	920830000	693410000	227420000
Apolipoprotein O;Protein FAM121B;Putative uncharacterized protein APOO	APOO;FAM121B;My025;UNQ1866/PRO4302	Isoform 1 of Apolipoprotein O;Isoform 2 of Apolipoprotein O;20 kDa protein	Q9BUR5-1;Q9BUR5;Q9BUR5-2;C9J574	3	2	2	13.1	22.284	198	3.8559e-18	0.32103	41257000	5766900	35490000
2-oxoglutarate dehydrogenase complex component E2;Dihydrolipoamide succinyltransferase component of 2-oxoglutarate dehydrogenase complex;Dihydrolipoyllysine-residue succinyltransferase component of 2-oxoglutarate dehydrogenase complex, mitochondrial;E2K;cDNA FLJ55035, highly similar to Dihydrolipoyllysine-residue succinyltransferase component of 2- oxoglutarate dehydrogenase complex, mitochondria…	DLST;DLTS;DLSTP;E2k;hCG_22359	Dihydrolipoyllysine-residue succinyltransferase component of 2-oxoglutarate dehydrogenase complex, mitochondrial;Alpha-ketoglutarate dehydrogenase complex dihydrolipoyl succinyltransferase;cDNA FLJ55034, highly similar to Dihydrolipoyllysine-residue succin	P36957;B7Z6J1;B7ZAZ8;Q6IBS5;Q16187;B7Z5W8;E7ESY5;Q86TQ8;Q86TW7;Q6LEQ7;Q86SW4	4	2	2	4.2	48.755	453	0.0014886	0.32124	6291000	2073600	4217400
TM30p1;Tropomyosin alpha-4 chain;Tropomyosin-4;cDNA FLJ54184, highly similar to Tropomyosin alpha-4 chain;cDNA FLJ52936, weakly similar to Tropomyosin alpha-4 chain	TPM4	Isoform 1 of Tropomyosin alpha-4 chain;cDNA FLJ52936, weakly similar to Tropomyosin alpha-4 chain	P67936-1;P67936;B4DVY2;B4DTB1	4	12	3	40.3	28.521	248	1.6745e-49	0.32264	34443000	23141000	11302000
63 kDa membrane protein;Cytoskeleton-associated protein 4;CKAP4 protein;Similar to cytoskeleton-associated protein 4;cDNA FLJ41699 fis, clone HCHON2004776, highly similar to Homo sapiens cytoskeleton-associated protein 4 (CKAP4), mRNA	CKAP4	Cytoskeleton-associated protein 4;CKAP4 protein (Fragment);Similar to cytoskeleton-associated protein 4 (Fragment);Uncharacterized protein	Q07065;Q6NWZ1;Q8TB01;B3KVX6;F2Z335	4	2	2	3.5	66.022	602	0.00071881	0.3227	4613900	1204500	3409400
ATP synthase subunit d, mitochondrial;ATP5H protein	ATP5H;My032	Isoform 1 of ATP synthase subunit d, mitochondrial;Isoform 2 of ATP synthase subunit d, mitochondrial;11 kDa protein;ATP5H protein (Fragment)	O75947-1;O75947;O75947-2;A0PJH2	5	7	7	34.8	18.491	161	1.3016e-26	0.32397	72370000	55845000	16525000
14-3-3 protein epsilon;cDNA FLJ51975, moderately similar to 14-3-3 protein epsilon (14-3-3E);cDNA, FLJ79100, highly similar to 14-3-3 protein epsilon (14-3-3E)	YWHAE	Isoform 1 of 14-3-3 protein epsilon;Isoform SV of 14-3-3 protein epsilon	P62258-1;P62258;P62258-2;B4DJF2;B7ZA86	5	9	6	32.5	29.174	255	1.1047e-78	0.32468	55944000	40946000	14998000
27 kDa prosomal protein;Macropain iota chain;Multicatalytic endopeptidase complex iota chain;Proteasome iota chain;Proteasome subunit alpha type-6;cDNA FLJ52022, highly similar to Proteasome subunit alpha type 6 (EC 3.4.25.1);cDNA, FLJ79122, highly similar to Proteasome subunit alpha type 6 (EC 3.4.25.1);cDNA FLJ51729, highly similar to Proteasome subunit alpha type 6 (EC 3.4.25.1);Proteasome (Pr…	PROS27;PSMA6;hCG_21177	Proteasome subunit alpha type-6;cDNA FLJ51729, highly similar to Proteasome subunit alpha type 6	P60900;B4DQR4;B4DXJ9;Q9BZ93	2	3	3	13	27.399	246	5.1593e-14	0.32657	13339000	5505600	7833200
GTP-specific succinyl-CoA synthetase subunit beta;Succinyl-CoA ligase [GDP-forming] subunit beta, mitochondrial;Succinyl-CoA synthetase beta-G chain;SUCLG2 protein;Putative uncharacterized protein SUCLG2;cDNA FLJ50080, highly similar to Succinyl-CoA ligase (GDP-forming) beta-chain, mitochondrial (EC 6.2.1.4);Putative uncharacterized protein DKFZp586M2023	SUCLG2;DKFZp586M2023	Succinyl-CoA ligase [GDP-forming] subunit beta, mitochondrial;succinyl-CoA ligase [GDP-forming] subunit beta, mitochondrial isoform 1 precursor;cDNA FLJ50080, highly similar to Succinyl-CoA ligase (GDP-forming) beta-chain, mitochondrial;Putative uncharacte	Q96I99;Q3ZCW5;C9JVT2;B7Z2D5;E9PDQ8;Q9Y436	4	6	6	13.7	46.51	432	1.9059e-13	0.32816	10994000	6821500	4172200
14-3-3 protein zeta/delta;Protein kinase C inhibitor protein 1;Tyrosine 3-monooxygenase/tryptophan 5-monooxygenase activation protein zeta polypeptide;cDNA, FLJ79516, highly similar to 14-3-3 protein zeta/delta;14-3-3 protein/cytosolic phospholipase A2 protein	YWHAZ	Uncharacterized protein;14-3-3 protein zeta/delta;Uncharacterized protein;cDNA, FLJ79516, highly similar to 14-3-3 protein zeta/delta;Uncharacterized protein;Uncharacterized protein	E7EX29;P63104;D0PNI1;E7ESK7;B0AZS6;E7EVZ2;E9PD24;Q6LD62	14	13	8	42.3	28.036	246	1.4938e-132	0.32938	139060000	100620000	38439000
ATP synthase subunit epsilon, mitochondrial;ATP synthase subunit epsilon-like protein, mitochondrial	ATP5E;ATP5EP2	ATP synthase subunit epsilon, mitochondrial;ATP synthase subunit epsilon-like protein, mitochondrial	P56381;Q5VTU8	2	3	3	45.1	5.7797	51	2.1904e-05	0.33006	38962000	29296000	9665700
14.5 kDa translational inhibitor protein;Ribonuclease UK114;UK114 antigen homolog;Heat-responsive protein 12;Heat-responsive protein 12, isoform CRA_a;UK114 protein	HRSP12;PSP;hCG_18221;UK114	Ribonuclease UK114;Protein;Protein;Uncharacterized protein	P52758;Q6IBG0;E5RI71	4	2	2	19.7	14.494	137	1.3625e-28	0.33009	12006000	4533500	7472300
Endoplasmic reticulum resident protein 46;Thioredoxin domain-containing protein 5;Thioredoxin-like protein p46;Putative uncharacterized protein DKFZp666I134;Putative uncharacterized protein STRF8;TXNDC5 protein;cDNA, FLJ96678, Homo sapiens thioredoxin domain containing 5 (TXNDC5), mRNA;HCG1811539, isoform CRA_b	TLP46;TXNDC5;UNQ364/PRO700;DKFZp666I134;STRF8;hCG_1811539	Thioredoxin domain-containing protein 5;Thioredoxin domain containing protein;thioredoxin domain-containing protein 5 isoform 3	Q8NBS9;Q658S9;Q6EHZ3;Q86UY0;B2RDM2	3	4	4	8.8	47.628	432	1.998e-14	0.33292	13191000	5352700	7838800
Acetylcholinesterase-associated protein;Brain acetylcholinesterase putative membrane anchor;Protein CutA;Putative uncharacterized protein CUTA	ACHAP;C6orf82;CUTA	Isoform A of Protein CutA;Isoform B of Protein CutA;Isoform C of Protein CutA;Uncharacterized protein	O60888-2;O60888;O60888-1;O60888-3;C9IZG4	4	2	2	13.1	20.925	198	1.1791e-30	0.33293	5439000	2262500	3176600
ATP synthase subunit gamma, mitochondrial;F-ATPase gamma subunit;ATP synthase gamma chain;cDNA FLJ59861, highly similar to ATP synthase gamma chain, mitochondrial (EC 3.6.3.14)	ATP5C;ATP5C1;ATP5CL1;hCG_25112;RP11-401E9.1-001	Isoform Liver of ATP synthase subunit gamma, mitochondrial;Isoform Heart of ATP synthase subunit gamma, mitochondrial;ATP synthase gamma chain	P36542-1;P36542;Q6I9V2;Q8TAS0;P36542-2;B4DFE6;B4DL14	3	6	6	18.5	32.996	298	7.6556e-11	0.33358	36145000	26345000	9800300
Adenylosuccinase;Adenylosuccinate lyase;cDNA FLJ59367, highly similar to Adenylosuccinate lyase (EC 4.3.2.2);Trinucleotide repeat containing 6B;cDNA FLJ75223, highly similar to Homo sapiens adenylosuccinate lyase (ADSL);cDNA FLJ53891, highly similar to Adenylosuccinate lyase (EC 4.3.2.2)	ADSL;AMPS;RP5-1042K10.8-004;RP5-1042K10.7-008;TNRC6B	Isoform 1 of Adenylosuccinate lyase;cDNA FLJ59367, highly similar to Adenylosuccinate lyase;Trinucleotide repeat containing 6B (Fragment);Isoform 2 of Adenylosuccinate lyase;cDNA FLJ53891, highly similar to Adenylosuccinate lyase	P30566-1;P30566;Q71UA4;B0QY75;B4DP46;E7ERF4;B7ZB91;P30566-2;A8K4X6;B4DUM2	6	5	5	10.5	54.889	484	8.3044e-13	0.33383	17225000	5366600	11858000
AIR carboxylase;Multifunctional protein ADE2;Phosphoribosylaminoimidazole carboxylase;Phosphoribosylaminoimidazole-succinocarboxamide synthase;SAICAR synthetase	ADE2;AIRC;PAICS;PAIS	Multifunctional protein ADE2;Isoform 2 of Multifunctional protein ADE2;Uncharacterized protein;Uncharacterized protein	P22234-1;P22234;P22234-2;B4DGX3;E9PBS1;D6RF62	4	5	5	10.4	49.679	451	5.8908e-22	0.33428	65563000	36451000	29112000
CROC-1;TRAF6-regulated IKK activator 1 beta Uev1A;Ubiquitin-conjugating enzyme E2 variant 1;DDVit 1;Enterocyte differentiation-associated factor 1;Enterocyte differentiation-promoting factor 1;MMS2 homolog;Ubiquitin-conjugating enzyme E2 variant 2;Vitamin D3-inducible protein;cDNA, FLJ93989, Homo sapiens ubiquitin-conjugating enzyme E2 variant 2 (UBE2V2),mRNA;Ubiquitin-conjugating enzyme E2 varia…	CROC1;P/OKcl.19;UBE2V;UBE2V1;UEV1;MMS2;UBE2V2;UEV2;hCG_1640505;RP5-1185N5.3-005	Isoform 1 of Ubiquitin-conjugating enzyme E2 variant 1;Isoform 5 of Ubiquitin-conjugating enzyme E2 variant 1;Isoform 2 of Ubiquitin-conjugating enzyme E2 variant 1;Protein;Isoform 3 of Ubiquitin-conjugating enzyme E2 variant 1;Ubiquitin-conjugating enzyme	Q13404-1;Q13404;Q13404-7;Q13404-2;Q13404-4;Q15819;A0M8W4;Q5TGE0;D6RG00	9	1	1	2.7	42.208	370	1.8112e-12	0.33661	8141000	4116600	4024400
Ras-related protein Rab-11A;YL8;cDNA FLJ61136, highly similar to Ras-related protein Rab-11A;GTP-binding protein YPT3;Ras-related protein Rab-11B;RAB11B protein;RAB11B, member RAS oncogene family;cDNA FLJ61134, highly similar to Ras-related protein Rab-11B;cDNA FLJ51542, highly similar to Ras-related protein Rab-11B	RAB11;RAB11A;RAB11B;YPT3	cDNA FLJ61136, highly similar to Ras-related protein Rab-11A;Ras-related protein Rab-11B;RAB11B protein;ras-related protein Rab-11A isoform 2;18 kDa protein	P62491;B4DMN1;Q15907;A5YM50;Q5U0I1;Q6FHR0;Q6FI42;B4DMK0;B4DT13	7	3	3	10.3	28.861	261	0.0002222	0.3387	7089000	2741700	4347300
47 kDa heat shock protein;Arsenic-transactivated protein 3;Cell proliferation-inducing gene 14 protein;Collagen-binding protein;Rheumatoid arthritis-related antigen RA-A47;Serpin H1;cDNA FLJ78501, highly similar to Homo sapiens serpin peptidase inhibitor, clade H (heat shock protein 47), member 1, (collagen binding protein 1) (SERPINH1), mRNA;cDNA FLJ52569, highly similar to Collagen-binding prot…	CBP1;CBP2;HSP47;PIG14;SERPINH1;SERPINH2;ra-a47	Serpin H1;cDNA FLJ52569, highly similar to Collagen-binding protein 2;Uncharacterized protein;Uncharacterized protein;Uncharacterized protein;Uncharacterized protein	P50454;A8K259;B4DN87;E9PKH2;E9PPV6;E9PR70;Q9NPA9;E9PMI5;E9PK86	13	10	10	22.5	46.44	418	7.3982e-37	0.34191	114950000	70449000	44505000
Glycoprotein GP36b;Lectin mannose-binding 2;Vesicular integral-membrane protein VIP36;cDNA FLJ75774, highly similar to Homo sapiens lectin, mannose-binding 2 (LMAN2), mRNA;cDNA FLJ52285, highly similar to Vesicular integral-membrane protein VIP36	C5orf8;LMAN2	Vesicular integral-membrane protein VIP36;cDNA FLJ52285, highly similar to Vesicular integral-membrane protein VIP36;Uncharacterized protein;Uncharacterized protein	Q12907;A8K7T4;B4DWN1;D6RIU4;D6RBV2;D6RDX1	4	2	2	5.6	40.228	356	7.2897e-19	0.34233	10410000	7920700	2489100
Glycoprotein 25L2;Transmembrane emp24 domain-containing protein 9;cDNA, FLJ93804, highly similar to Homo sapiens gp25L2 protein (HSGP25L2G), mRNA;cDNA FLJ56646, highly similar to Transmembrane emp24 domain-containing protein 9	GP25L2;TMED9	Transmembrane emp24 domain-containing protein 9	Q9BVK6;B2R8A2;B4DPP4	1	4	4	15.3	27.277	235	3.3358e-53	0.34233	44398000	31709000	12689000
Coiled-coil domain-containing protein 51	CCDC51	Isoform 1 of Coiled-coil domain-containing protein 51;Isoform 2 of Coiled-coil domain-containing protein 51	Q96ER9-1;Q96ER9;Q96ER9-2	2	3	3	6.6	45.811	411	4.0788e-11	0.34312	6259900	4176900	2083000
Granzyme A-activated DNase;Metastasis inhibition factor nm23;nm23-H1;Nucleoside diphosphate kinase A;Tumor metastatic process-associated protein	NDPKA;NM23;NME1	Isoform 2 of Nucleoside diphosphate kinase A;Isoform 1 of Nucleoside diphosphate kinase A	P15531-2;P15531;P15531-1	2	9	1	45.8	19.653	177	5.0193e-36	0.34349	155300000	116340000	38963000
Mitochondrial aspartate-glutamate carrier protein;Solute carrier family 25, member 13 (Citrin), isoform CRA_a;Calcium-binding mitochondrial carrier protein Aralar2;Citrin;Mitochondrial aspartate glutamate carrier 2;Solute carrier family 25 member 13;Solute carrier family 25, member 13 (Citrin) variant;Putative uncharacterized protein SLC25A13;cDNA FLJ54671, highly similar to Calcium-binding mitoc…	hCG_40633;SLC25A13;ARALAR2	calcium-binding mitochondrial carrier protein Aralar2 isoform 1;Calcium-binding mitochondrial carrier protein Aralar2;cDNA FLJ54671, highly similar to Calcium-binding mitochondrial carrier protein Aralar2	Q546F9;Q9UJS0;Q53GR7;Q75KX8;Q75M55;B7Z2E2	4	11	8	16.9	74.303	676	4.6333e-59	0.34681	66879000	27771000	39108000
C9orf88 variant protein;Chromosome 9 open reading frame 88, isoform CRA_c;Family with sequence similarity 129, member B;OC58;Meg-3;Niban-like protein 1;Protein FAM129B;cDNA FLJ13518 fis, clone PLACE1005799	C9orf88 variant protein;C9orf88;FAM129B;hCG_17928;OC58;RP11-356B19.6-004	niban-like protein 1 isoform 1;Niban-like protein 1	Q4LE55;Q5VVW7;Q96TA1;Q9H8K1	2	2	2	2.8	84.137	746	0.00037097	0.34783	1584300	749080	835180
Leukemia-associated phosphoprotein p18;Metablastin;Oncoprotein 18;Phosphoprotein p19;pp17;Prosolin;Protein Pr22;Stathmin;Stathmin-2;Superior cervical ganglion-10 protein	LAP18;OP18;STMN1;SCG10;SCGN10;STMN2;RP1-125I3.5-006;RP1-125I3.5-004	Stathmin;stathmin isoform b;stathmin-2 isoform 1;Stathmin-2;Stathmin;Stathmin;Stathmin	P16949;B5BU83;Q96CE4;B7Z8N4;Q93045;B7Z4N6;E5RGX5;A2A2D2;C9JR06;A2A2D0	9	4	4	26.2	17.302	149	2.846e-18	0.34831	9092000	5641600	3450400
Annexin A2;Annexin II;Annexin-2;Calpactin I heavy chain;Calpactin-1 heavy chain;Chromobindin-8;Lipocortin II;p36;Placental anticoagulant protein IV;Protein I;Annexin A2 pseudogene 2;Lipocortin II pseudogene;Putative annexin A2-like protein;cDNA FLJ34687 fis, clone MESAN2000620, highly similar to Annexin A2	ANX2;ANX2L4;ANXA2;CAL1H;LPC2D;ANX2L2;ANX2P2;ANXA2P2;LPC2B	Isoform 2 of Annexin A2;Isoform 1 of Annexin A2;Putative annexin A2-like protein;cDNA FLJ34687 fis, clone MESAN2000620, highly similar to Annexin A2	P07355-2;P07355;P07355-1;A6NMY6;B3KRQ1	5	24	24	51.8	40.411	357	0	0.34993	2077700000	1509200000	568470000
450 kDa epidermal antigen;Epiplakin;Putative uncharacterized protein DKFZp434G0719	EPIPL;EPPK1;DKFZp434G0719	Epiplakin	P58107;E9PPU0;Q9NSU9	1	3	2	2.8	555.61	5090	0.00011531	0.35086	1426300	800720	625580
Glutamate dehydrogenase 1, mitochondrial;cDNA FLJ55926, highly similar to Glutamate dehydrogenase 1, mitochondrial (EC 1.4.1.3);cDNA FLJ56193, highly similar to Glutamate dehydrogenase 1, mitochondrial (EC 1.4.1.3);Glutamate dehydrogenase 1 variant;cDNA FLJ55493, highly similar to Glutamate dehydrogenase 1, mitochondrial (EC 1.4.1.3);Glutamate dehydrogenase 2, mitochondrial;GLUD2 protein;cDNA FLJ…	GLUD;GLUD1;GLUD2;GLUDP1;hCG_1993805	Glutamate dehydrogenase 1, mitochondrial;cDNA FLJ55493, highly similar to Glutamate dehydrogenase 1, mitochondrial;Glutamate dehydrogenase 2, mitochondrial;cDNA FLJ37463 fis, clone BRAWH2011400, highly similar to Glutamate dehydrogenase 1, mitochondrial;cD	P00367;B4DMG8;B4E0N9;E9KL48;Q53GW3;B4DMF5;P49448;Q9BSD0;B3KT18;B4DGN5;B3KV55;Q14400;Q59FQ4	8	10	10	18.8	61.397	558	1.8009e-48	0.35151	97195000	74138000	23057000
SPRY domain-containing protein 4	SPRYD4	SPRY domain-containing protein 4	Q8WW59	2	3	3	13	23.128	207	1.155e-06	0.35282	37239000	19463000	17775000
Thioredoxin domain-containing protein 1;Thioredoxin-related transmembrane protein 1;Transmembrane Trx-related protein;cDNA FLJ51569, highly similar to Thioredoxin domain-containing protein 1;cDNA FLJ51570, highly similar to Thioredoxin domain-containing protein 1;Thioredoxin domain containing, isoform CRA_b	PSEC0085;TMX;TMX1;TXNDC;TXNDC1;UNQ235/PRO268;hCG_2042974	Thioredoxin-related transmembrane protein 1;cDNA FLJ51570, highly similar to Thioredoxin domain-containing protein 1	Q9H3N1;B7Z7R5;B4DZX7	2	4	4	15	31.791	280	5.6109e-36	0.35444	25390000	12231000	13160000
Interleukin-1 receptor 3;Interleukin-1 receptor accessory protein;cDNA FLJ77565, highly similar to Homo sapiens interleukin 1 receptor accessory protein (IL1RAP), transcript variant 1, mRNA;cDNA FLJ37788 fis, clone BRHIP2028593, weakly similar to Homo sapiens IL-1 receptor accessory protein mRNA;Putative uncharacterized protein IL1RAP	C3orf13;IL1R3;IL1RAP	Isoform 1 of Interleukin-1 receptor accessory protein;Isoform 4 of Interleukin-1 receptor accessory protein;Isoform 2 of Interleukin-1 receptor accessory protein;Isoform 3 of Interleukin-1 receptor accessory protein;Uncharacterized protein;Uncharacterized	Q9NPH3-1;Q9NPH3;A8K6K4;Q9NPH3-5;Q8N9C1;Q9NPH3-2;Q9NPH3-3;C9J1D9;C9JT28	6	4	4	6.8	65.418	570	4.9634e-08	0.35492	27402000	13387000	14015000
Farnesyl-diphosphate farnesyltransferase;FPP:FPP farnesyltransferase;Squalene synthase;Farnesyl-diphosphate farnesyltransferase 1;Farnesyl-diphosphate farnesyltransferase 1, isoform CRA_a;FDFT1 protein;cDNA FLJ55760, highly similar to Squalene synthetase (EC 2.5.1.21);cDNA, FLJ79081, highly similar to Squalene synthetase (EC 2.5.1.21);cDNA FLJ50669, highly similar to Squalene synthetase (EC 2.5.1…	FDFT1;hCG_17749	Squalene synthase;cDNA, FLJ79081, highly similar to Squalene synthetase;Uncharacterized protein;cDNA FLJ50548, highly similar to Squalene synthetase;cDNA, FLJ79433, highly similar to Squalene synthetase;cDNA FLJ33164 fis, clone UTERU2000542, highly similar	P37268;Q6IAX1;B4DND3;B4DTK0;B7Z1J3;B7Z9R8;E9PNM1;B4DJE5;B4DT56;B3KQ95;B4DWP0	8	9	9	23	48.115	417	1.3198e-74	0.35726	59803000	28493000	31310000
Cytochrome c oxidase subunit 6B1;Cytochrome c oxidase subunit VIb isoform 1	COX6B;COX6B1	Cytochrome c oxidase subunit 6B1	P14854	1	2	2	16.5	12.035	103	3.6641e-05	0.35765	6073200	5069300	1004000
Glutamine amidotransferase;GMP synthase [glutamine-hydrolyzing];GMP synthetase;cDNA FLJ75406, highly similar to Homo sapiens guanine monphosphate synthetase (GMPS), mRNA;cDNA, FLJ79481, highly similar to GMP synthase (glutamine-hydrolyzing) (EC6.3.5.2);Guanine monphosphate synthetase, isoform CRA_b;Guanine monophosphate synthetase variant;cDNA FLJ57604, highly similar to GMP synthase (glutamine-h…	GMPS;hCG_1811302	GMP synthase [glutamine-hydrolyzing];cDNA FLJ57604, highly similar to GMP synthase;Uncharacterized protein	P49915;A8K639;Q53F90;B4DUT7;B4DXV7;E9PCK3	3	3	3	4.9	76.715	693	6.1385e-09	0.35853	5487700	4602500	885210
ATP synthase subunit b, mitochondrial;cDNA FLJ78635, highly similar to Homo sapiens ATP synthase, H+ transporting, mitochondrial F0 complex, subunit b, isoform 1 (ATP5F1), transcript variant 1, mRNA;cDNA, FLJ94101, Homo sapiens ATP synthase, H+ transporting, mitochondrial F0complex, subunit b, isoform 1 (ATP5F1), mRNA;Cell proliferation-inducing protein 47;HCG39985, isoform CRA_a;ATP synthase, H+…	ATP5F1;hCG_39985;RP11-552M11.5-005	ATP synthase subunit b, mitochondrial;ATP synthase, H+ transporting, mitochondrial F0 complex, subunit B1	P24539;A8K4W2;Q08ET0;Q53GB3;Q5QNZ2	2	5	5	19.9	28.908	256	5.4943e-77	0.35986	140720000	91876000	48843000
Membrane-associated progesterone receptor component 1;cDNA, FLJ94602, Homo sapiens progesterone receptor membrane component 1 (PGRMC1),mRNA;PGRMC1 protein;Progesterone receptor membrane component 1;Progesterone receptor membrane component 1, isoform CRA_a;cDNA FLJ50115, moderately similar to Membrane-associated progesterone receptor component 1;Progesterone receptor membrane component 1, isoform …	HPR6.6;PGRMC;PGRMC1;hCG_23188	Membrane-associated progesterone receptor component 1;cDNA FLJ50115, moderately similar to Membrane-associated progesterone receptor component 1	O00264;Q6IB11;B7Z1L3	2	4	3	16.9	21.671	195	1.164e-07	0.35989	28794000	17941000	10854000
Sodium- and chloride-dependent taurine transporter;Solute carrier family 6 member 6;Transporter	SLC6A6;hCG_1995322	Sodium- and chloride-dependent taurine transporter	P31641;B2RNU7	3	3	3	5.2	69.829	620	7.0532e-07	0.36196	9869200	6294700	3574500
Iron-sulfur subunit of complex II;Succinate dehydrogenase [ubiquinone] iron-sulfur subunit, mitochondrial;Succinate dehydrogenase complex subunit B;Succinate dehydrogenase complex, subunit B, iron sulfur (Ip)	SDH;SDH1;SDHB	Succinate dehydrogenase [ubiquinone] iron-sulfur subunit, mitochondrial	P21912;Q0QEY7;Q70SX8	1	5	5	17.5	31.629	280	5.958e-09	0.36224	22591000	16974000	5616900
Damage-specific DNA-binding protein 1;DDB p127 subunit;DNA damage-binding protein 1;DNA damage-binding protein a;HBV X-associated protein 1;UV-damaged DNA-binding factor;UV-damaged DNA-binding protein 1;Xeroderma pigmentosum group E-complementing protein;XPE-binding factor;cDNA FLJ56068, highly similar to DNA damage-binding protein 1;cDNA FLJ51067, highly similar to DNA damage-binding protein 1;c…	DDB1;XAP1	DNA damage-binding protein 1;cDNA FLJ56068, highly similar to DNA damage-binding protein 1;cDNA FLJ51067, highly similar to DNA damage-binding protein 1;DNA damage-binding protein 1-like isoform 5;cDNA FLJ51165, highly similar to DNA damage-binding protein	Q16531;B7Z2A1;B4DSA8;E7EPB0;B4DZP5;E7EPX6	11	4	4	3.4	126.97	1140	3.475e-10	0.36341	7161300	4310000	2851300
Cathepsin P;Cathepsin X;Cathepsin Z	CTSZ	Cathepsin Z	Q9UBR2;Q5U000	1	2	2	7.3	33.868	303	1.6098e-09	0.36638	2962300	1679900	1282400
GTP-binding protein 9;Obg-like ATPase 1;cDNA FLJ58890, highly similar to GTP-binding protein PTD004;Putative uncharacterized protein PTD004;Putative uncharacterized protein OLA1	GTPBP9;OLA1;PRO2455;PTD004	47 kDa protein;Isoform 1 of Obg-like ATPase 1;Isoform 3 of Obg-like ATPase 1;Uncharacterized protein	Q9NTK5-1;Q9NTK5;D7EHM2;Q9NTK5-3;B4DK14;E7EQU9;Q53SW9;C9JTK6	5	3	3	6.5	46.937	416	2.1172e-05	0.36895	5640000	3303000	2337000
Delta(3),delta(2)-enoyl-CoA isomerase;Diazepam-binding inhibitor-related protein 1;Dodecenoyl-CoA isomerase;DRS-1;Hepatocellular carcinoma-associated antigen 88;Peroxisomal 3,2-trans-enoyl-CoA isomerase;Renal carcinoma antigen NY-REN-1;Peroxisomal D3,D2-enoyl-CoA isomerase isoform 1 variant;PECI protein;Peroxisomal D3,D2-enoyl-CoA isomerase;Hepatocellular carcinoma-associated antigen 64;Putative …	DRS1;HCA88;PECI;RP5-1013A10.1-007;HCA64	Isoform 1 of Enoyl-CoA delta isomerase 2, mitochondrial;enoyl-CoA delta isomerase 2, mitochondrial isoform 1;Uncharacterized protein;Uncharacterized protein;17 kDa protein;cDNA FLJ56683, highly similar to Peroxisomal 3,2-trans-enoyl-CoA isomerase	O75521-1;O75521;Q53GC8;Q53HG3;Q6IBN4;O75521-2;Q5JYK4;Q9NYD2;C9JB63;F1LLU7;B4DLL3;Q59E94	7	3	3	6.6	43.585	394	6.0176e-11	0.36983	5978800	4092400	1886400
Coiled-coil domain-containing protein 56	CCDC56;HSPC009	Coiled-coil domain-containing protein 56	Q9Y2R0	1	1	1	9.4	11.731	106	5.6296e-09	0.37014	4173800	2580800	1593000
Frataxin intermediate form;Frataxin(56-210);Frataxin(81-210);Frataxin, mitochondrial;Friedreich ataxia protein;Putative uncharacterized protein FXN	FRDA;FXN;X25	Isoform 1 of Frataxin, mitochondrial;Uncharacterized protein;Protein;frataxin, mitochondrial isoform 2 preproprotein;Isoform 2 of Frataxin, mitochondrial	Q16595-1;Q16595;C9JAX1;A8MXJ6;Q16595-2	5	2	2	11	23.135	210	2.0643e-11	0.37128	6344200	4040300	2303900
Microsomal prostaglandin E synthase 2;Prostaglandin E synthase 2;Prostaglandin E synthase 2 truncated form;cDNA FLJ32487 fis, clone SKNSH1000002, highly similar to Prostaglandin E synthase 2 (EC 5.3.99.3);cDNA FLJ51353, highly similar to Prostaglandin E synthase 2 (EC 5.3.99.3);Prostaglandin E synthase 2, isoform CRA_c;Putative uncharacterized protein PTGES2	C9orf15;PGES2;PTGES2;hCG_1785478	Prostaglandin E synthase 2;Protein;Uncharacterized protein	Q9H7Z7;B3KPZ2;B4DWP1;A6NHH0	4	3	3	7.7	41.943	377	1.4641e-06	0.37197	3894000	2699200	1194800
Amyotrophic lateral sclerosis 2 chromosomal region candidate gene 1 protein;NIF3-like protein 1;Putative uncharacterized protein DKFZp762L015;cDNA FLJ57222;NIF3L1 isoform beta;Putative uncharacterized protein NIF3L1;NIF3L1 isoform gamma;UPF0594 protein C13orf38;C13orf38 protein	ALS2CR1;MDS015;My018;NIF3L1;DKFZp762L015;C13orf38	Isoform 1 of NIF3-like protein 1;Isoform 2 of NIF3-like protein 1;cDNA FLJ57222;NIF3-like protein 1 isoform 3;NIF3L1 isoform gamma;Isoform 4 of UPF0594 protein C13orf38;Isoform 1 of UPF0594 protein C13orf38;Uncharacterized protein;hypothetical protein LOC7	Q9GZT8-1;Q9GZT8;Q9GZT8-2;Q658J0;B4DX90;Q6X735;C9JN42;Q6X734;A6NNP5-4;A6NNP5;A6NNP5-1;E7EXA3;B7ZW49;A6NNP5-3;A6NNP5-5;B7ZW58;E9PBZ7	13	2	2	5.3	41.968	377	0.00017065	0.37579	2874000	2081600	792350
Low-density lipoprotein receptor;Low density lipoprotein receptor;Low density lipoprotein receptor variant;cDNA FLJ50622, highly similar to Low-density lipoprotein receptor;cDNA FLJ50552, highly similar to Low-density lipoprotein receptor;cDNA FLJ50672, highly similar to Low-density lipoprotein receptor;cDNA FLJ54620, highly similar to Low-density lipoprotein receptor;Mutant LDL receptor	LDLR;ldlr	Low-density lipoprotein receptor;low-density lipoprotein receptor isoform 2 precursor;low-density lipoprotein receptor isoform 4 precursor;low-density lipoprotein receptor isoform 6 precursor;low-density lipoprotein receptor isoform 3 precursor;low-density	P01130;Q9UH51;E2J5K4;Q59FQ1;B4DR00;B4DJZ8;E1B4S5;E1B4T0;Q6LCH2;B4DTQ3;B4DII3;Q6RCM4	6	5	5	6.5	95.375	860	4.4712e-55	0.37797	10938000	6262600	4675800
Transaldolase;cDNA FLJ57988, highly similar to Transaldolase (EC 2.2.1.2);Transaldolase 1, isoform CRA_c	TAL;TALDO;TALDO1;TALDOR;hCG_18330;TALH	Transaldolase;Uncharacterized protein	P37837;Q9UMF8;B4DID5;F2Z393;Q8WZ45	2	5	5	15.4	37.54	337	2.2881e-26	0.37889	21525000	14924000	6600500
Apolipoprotein E receptor 2;Low-density lipoprotein receptor-related protein 8;cDNA FLJ39163 fis, clone OCBBF2002615, highly similar to Low-density lipoprotein receptor-related protein 8;Low density lipoprotein receptor-related protein 8, apolipoprotein e receptor, isoform CRA_e;Nidogen-2;Osteonidogen;cDNA FLJ58776, highly similar to Nidogen-2;NID2 protein	APOER2;LRP8;hCG_33395;NID2	Isoform 1 of Low-density lipoprotein receptor-related protein 8;Isoform 3 of Low-density lipoprotein receptor-related protein 8;Isoform 4 of Low-density lipoprotein receptor-related protein 8;Isoform 2 of Low-density lipoprotein receptor-related protein 8;	Q14114-1;Q14114;Q14114-3;B3KU40;Q14114-4;Q14114-2;D3DQ39;E9PP15;Q9P116;Q14112-1;Q14112;Q14112-2;B4DPX8;E7EPP3;Q8IV28	10	2	2	2	105.63	963	0.0022133	0.38371	4432700	2275600	2157000
Membrane protein p24A;Transmembrane emp24 domain-containing protein 2;cDNA, FLJ93436, Homo sapiens coated vesicle membrane protein (RNP24), mRNA;RNP24 protein;Transmembrane emp24 domain trafficking protein 2, isoform CRA_a;cDNA FLJ52153, highly similar to Transmembrane emp24 domain-containing protein 2;cDNA FLJ52154, moderately similar to Transmembrane emp24 domain-containing protein 2	RNP24;TMED2;hCG_1743563	Transmembrane emp24 domain-containing protein 2;cDNA FLJ52153, highly similar to Transmembrane emp24 domain-containing protein 2;cDNA FLJ52154, moderately similar to Transmembrane emp24 domain-containing protein 2;18 kDa protein	Q15363;Q6FHT8;B4DP27;E7ESD4;B4E020;E7EQ72	4	2	2	9	22.761	201	6.2907e-06	0.38416	5823300	2637200	3186200
51 kDa FK506-binding protein;52 kDa FK506-binding protein;59 kDa immunophilin;FK506-binding protein 4;FKBP59;HSP-binding immunophilin;Immunophilin FKBP52;Peptidyl-prolyl cis-trans isomerase FKBP4;Peptidyl-prolyl cis-trans isomerase FKBP4, N-terminally processed;Rotamase;cDNA, FLJ94557, highly similar to Homo sapiens FK506 binding protein 4, 59kDa (FKBP4), mRNA	FKBP4;FKBP52	Peptidyl-prolyl cis-trans isomerase FKBP4	Q02790;B2R9U2	3	5	5	11.5	51.804	459	1.6579e-22	0.38496	14647000	4686500	9961000
Uncharacterized protein C19orf18	C19orf18	Uncharacterized protein C19orf18	Q8NEA5	1	1	1	3.3	24.151	215	0.034134	0.38566	14065000	10158000	3907000
Interleukin-25;Stromal cell-derived growth factor SF20;UPF0556 protein C19orf10	C19orf10;IL25	UPF0556 protein C19orf10	Q969H8	1	4	4	20.8	18.795	173	9.4896e-46	0.38758	57647000	41136000	16511000
LDLR chaperone MESD;Mesoderm development candidate 2;Mesoderm development protein;Renal carcinoma antigen NY-REN-61	KIAA0081;MESD;MESDC2;UNQ1911/PRO4369	LDLR chaperone MESD	Q14696	2	5	5	19.2	26.076	234	4.1666e-14	0.38836	162020000	152340000	9681400
Carnitine O-palmitoyltransferase 1, liver isoform;Carnitine O-palmitoyltransferase I, liver isoform;Carnitine palmitoyltransferase 1A;cDNA, FLJ95058, highly similar to Homo sapiens carnitine palmitoyltransferase 1A (liver) (CPT1A),nuclear gene encoding mitochondrial protein, mRNA;Carnitine palmitoyltransferase I	CPT1;CPT1A	Isoform 1 of Carnitine O-palmitoyltransferase 1, liver isoform;Isoform 2 of Carnitine O-palmitoyltransferase 1, liver isoform	P50416-1;P50416;B2RAQ8;Q8WZ48;P50416-2	4	3	3	4.3	88.367	773	1.0143e-06	0.38938	14965000	3932300	11033000
Apoptosis regulator BAX;Bcl-2-like protein 4;Bax protein;Bax epsilon;BCL2-associated X protein	BAX;BCL2L4	Isoform Beta of Apoptosis regulator BAX;Isoform Alpha of Apoptosis regulator BAX;Isoform Sigma of Apoptosis regulator BAX;Isoform Epsilon of Apoptosis regulator BAX;Isoform Delta of Apoptosis regulator BAX;Isoform Psi of Apoptosis regulator BAX;Isoform Zet	Q07812-2;Q07812;Q5ZPJ1;Q07812-1;Q07812-8;Q07812-5;O95074;Q07812-4;Q8WXU1;Q07812-7;Q07812-6;Q9UEI8	7	2	2	10.6	24.22	218	1.0357e-07	0.38983	5193300	2635200	2558100
Dolichyl-diphosphooligosaccharide--protein glycosyltransferase 67 kDa subunit;Dolichyl-diphosphooligosaccharide--protein glycosyltransferase subunit 1;Ribophorin I;Ribophorin-1;Ribophorin I variant;RPN1 protein;Similar to ribophorin I;cDNA FLJ51740, highly similar to Dolichyl-diphosphooligosaccharide--proteinglycosyltransferase 67 kDa subunit (EC 2.4.1.119);cDNA FLJ50809, highly similar to Dolich…	RPN1	Dolichyl-diphosphooligosaccharide--protein glycosyltransferase subunit 1 precursor;cDNA FLJ51740, highly similar to Dolichyl-diphosphooligosaccharide--proteinglycosyltransferase 67 kDa subunit;cDNA FLJ50809, highly similar to Dolichyl-diphosphooligosacchar	P04843;Q53EP4;Q6IBR0;Q96HX3;B4DL99;B7Z4L4;B4DNJ5	5	14	14	20.9	72.777	646	1.6711e-97	0.39118	103480000	62028000	41453000
cDNA FLJ51089, highly similar to FK506-binding protein 9 (EC 5.2.1.8);63 kDa FK506-binding protein;FK506-binding protein 9;Peptidyl-prolyl cis-trans isomerase FKBP9;Rotamase;cDNA PSEC0007 fis, clone NT2RM1000634, highly similar to FK506-binding protein 9 (EC 5.2.1.8);cDNA FLJ53833, highly similar to FK506-binding protein 9 (EC 5.2.1.8);cDNA FLJ53831, highly similar to FK506-binding protein 9 (EC …	FKBP60;FKBP63;FKBP9	cDNA FLJ51089, highly similar to FK506-binding protein 9;Peptidyl-prolyl cis-trans isomerase FKBP9;cDNA FLJ53833, highly similar to FK506-binding protein 9;cDNA FLJ53831, highly similar to FK506-binding protein 9;cDNA FLJ55188, highly similar to FK506-bind	B7Z6H3;O95302;B3KQQ0;B7Z230;B7Z1U8;B7Z1G9;C9J4P8	8	4	4	5.3	69.154	623	7.2109e-05	0.39266	8489700	5256900	3232800
Cartilage-associated protein;cDNA FLJ10772 fis, clone NT2RP4000243, highly similar to Cartilage-associated protein;cDNA FLJ35671 fis, clone SPLEN2018180, highly similar to Cartilage-associated protein;cDNA FLJ44469 fis, clone UTERU2026090, highly similar to Cartilage-associated protein;Cartilage associated protein, isoform CRA_a;cDNA FLJ55123, highly similar to Cartilage-associated protein;cDNA F…	CASP;CRTAP;hCG_1996245	Cartilage-associated protein;cDNA FLJ34453 fis, clone HLUNG2002429, highly similar to Homo sapiens cartilage-associated protein;Uncharacterized protein;cDNA PSEC0091 fis, clone PLACE1001683, highly similar to Cartilage-associated protein;cDNA FLJ40331 fis,	O75718;B3KME2;B3KS71;B3KX16;B4DPA3;Q8NB01;C9JP16;B3KQR7;E7ESX9;B3KUP0	5	1	1	2	46.561	401	0.055514	0.39356	2182400	1403500	778970
Signal peptidase complex SPC-18;Endopeptidase SP18;Microsomal signal peptidase 18 kDa subunit;SEC11 homolog A;SEC11-like protein 1;Signal peptidase complex catalytic subunit SEC11A;SPC18;SPC18 protein;cDNA FLJ51313, highly similar to Microsomal signal peptidase 18 kDa subunit(EC 3.4.-.-);SEC11-like 1 (S. cerevisiae), isoform CRA_d	SEC11A;SEC11L1;SPC18;SPCS4A;hCG_26624	Signal peptidase complex SPC-18;Signal peptidase complex catalytic subunit SEC11A;cDNA FLJ51313, highly similar to Microsomal signal peptidase 18 kDa subunit	Q7Z4Z6;P67812;Q6IAM7;B4DUL4	4	3	3	13.8	21.612	188	1.558e-12	0.39383	33975000	25149000	8825800
GDP-fucose protein O-fucosyltransferase 1;Peptide-O-fucosyltransferase 1;cDNA FLJ50933, highly similar to GDP-fucose protein O-fucosyltransferase 1 (EC 2.4.1.221)	FUT12;KIAA0180;POFUT1	Isoform 1 of GDP-fucose protein O-fucosyltransferase 1;Isoform 2 of GDP-fucose protein O-fucosyltransferase 1	Q9H488-1;Q9H488;B4DZS3;Q9H488-2	2	1	1	2.6	43.955	388	0.0084485	0.39434	8322900	4898500	3424500
Probable saccharopine dehydrogenase;Saccharopine dehydrogenase (Putative)	CGI-49;SCCPDH;RP11-439E19.2-003	Probable saccharopine dehydrogenase;Uncharacterized protein	Q8NBX0;E9PEA8;Q5VTK4	2	5	5	13.1	47.151	429	2.4218e-10	0.39566	44805000	27338000	17467000
Microsomal signal peptidase 25 kDa subunit;Signal peptidase complex subunit 2;cDNA FLJ56339, highly similar to Signal peptidase complex subunit 2 (EC 3.4.-.-)	KIAA0102;SPC25;SPCS2	Uncharacterized protein;Signal peptidase complex subunit 2;Signal peptidase complex subunit 2;19 kDa protein;Uncharacterized protein;Uncharacterized protein	E9PI68;Q15005;B4DDB9;E9PL01;E9PRB9	6	2	2	7	28.503	257	0.00078756	0.39703	11703000	5957100	5746100
Chromobox protein homolog 3;HECH;Heterochromatin protein 1 homolog gamma;Modifier 2 protein;Chromobox homolog 3 (HP1 gamma homolog, Drosophila);Chromobox homolog 3 (HP1 gamma homolog, Drosophila), isoform CRA_a;Coiled-coil domain containing 32, isoform CRA_c;Chromobox homolog 3 (HP1 gamma homolog, Drosophila), isoform CRA_b;Putative uncharacterized protein CBX3	CBX3;CCDC32;hCG_1745364;hCG_1999239;tcag7.173	Chromobox protein homolog 3;Uncharacterized protein;Uncharacterized protein	Q13185;A4D177;B8ZZ43;C9JMM0	3	4	4	19.7	20.811	183	3.9733e-13	0.3985	10226000	5700500	4525900
Gamma-tropomyosin;Tropomyosin alpha-3 chain;Tropomyosin-3;Tropomyosin-5;cDNA, FLJ96568, highly similar to Homo sapiens tropomyosin 3 (TPM3), mRNA;Putative uncharacterized protein DKFZp686J1372;Tropomyosin 3;Tropomyosin 3, isoform CRA_b;TPMsk3;cDNA FLJ50612, highly similar to Rattus norvegicus tropomyosin 3, gamma (Tpm3), transcript variant 2, mRNA;Cytoskeletal tropomyosin isoform (2.5 kb);cDNA FL…	TPM3;DKFZp686J1372;RP11-205M9.1-003;hCG_1997142;RP11-205M9.1-006;RP11-205M9.1-009;RP11-205M9.1-005;OK/SW-cl.5;RP11-205M9.1-010;RP11-205M9.1-011	Isoform 2 of Tropomyosin alpha-3 chain;Putative uncharacterized protein DKFZp686J1372;Tropomyosin 3, isoform CRA_b;tropomyosin alpha-3 chain isoform 4;Isoform 3 of Tropomyosin alpha-3 chain;Tropomyosin 3;cDNA FLJ50720, highly similar to Homo sapiens tropom	P06753-2;P06753;B2RDE1;Q5HYB6;Q5VU59;Q5VU58;Q8TCG3;Q5VU66;P06753-3;B4DQ80;Q5VU61;Q6LDX7;Q8NAG3;Q8NI98;B4DWT5;Q5VU72;Q5VU63	15	12	2	46	29.032	248	1.9685e-108	0.39894	124630000	79978000	44655000
Complement component 1 Q subcomponent-binding protein, mitochondrial;GC1q-R protein;Glycoprotein gC1qBP;Hyaluronan-binding protein 1;Mitochondrial matrix protein p32;p33;cDNA FLJ75700, highly similar to Homo sapiens complement component 1, q subcomponent binding protein (C1QBP), nuclear gene encoding mitochondrial protein, mRNA	C1QBP;GC1QBP;HABP1;SF2P32	Complement component 1 Q subcomponent-binding protein, mitochondrial	Q07021;A8K651	1	3	3	13.8	31.362	282	1.4148e-24	0.39913	4484900	3337200	1147700
Transmembrane 9 superfamily member 4;cDNA FLJ54092, highly similar to Transmembrane 9 superfamily protein member 4;cDNA, FLJ79192, highly similar to Transmembrane 9 superfamily protein member 4;cDNA FLJ53349, highly similar to Transmembrane 9 superfamily protein member 4;cDNA FLJ44570 fis, clone UTERU3011063, highly similar to Transmembrane 9 superfamily protein member 4	KIAA0255;TM9SF4	Transmembrane 9 superfamily member 4;Similar to Transmembrane 9 superfamily member 4 precursor;cDNA FLJ53349, highly similar to Transmembrane 9 superfamily protein member 4;cDNA FLJ44570 fis, clone UTERU3011063, highly similar to Transmembrane 9 superfamil	Q92544;B4DH88;B4DKC1;E7ERN6;Q6ZTK5	7	3	3	3.7	74.518	642	0.0016856	0.39975	9523500	4912200	4611400
19 kDa FK506-binding protein;FK506-binding protein 11;Peptidyl-prolyl cis-trans isomerase FKBP11;Rotamase;cDNA FLJ53772, highly similar to FK506-binding protein 11 (EC 5.2.1.8);FK506 binding protein 11, 19 kDa, isoform CRA_b;FKBP11 protein	FKBP11;FKBP19;UNQ336/PRO535;hCG_1642966	Peptidyl-prolyl cis-trans isomerase FKBP11;peptidyl-prolyl cis-trans isomerase FKBP11 isoform 3 precursor	Q9NYL4;B4DWB7;Q86SR8	2	2	2	9	22.18	201	2.0719e-09	0.39999	14881000	10995000	3885900
SM22-alpha homolog;Transgelin-2	CDABP0035;KIAA0120;TAGLN2	24 kDa protein;Transgelin-2;21 kDa protein	P37802;E9KL39	5	7	7	33.6	24.454	220	4.4672e-63	0.40296	36340000	20849000	15492000
Myotrophin;Protein V-1;cDNA FLJ31663 fis, clone NT2RI2004504, highly similar to MYOTROPHIN;Myotrophin, isoform CRA_a;Putative uncharacterized protein DKFZp761E1322;V-1 protein;Putative uncharacterized protein MTPN	MTPN;DKFZp761E1322;hCG_16971;tcag7.994	Myotrophin;Uncharacterized protein	P58546;Q69YG1;C9JL85	2	2	2	22	12.895	118	2.6344e-18	0.40449	5548600	3678000	1870600
Membrane-associated progesterone receptor component 2;Progesterone membrane-binding protein;Steroid receptor protein DG6;Progesterone receptor membrane component 2, isoform CRA_a	DG6;PGRMC2;PMBP;hCG_16401	membrane-associated progesterone receptor component 2;Membrane-associated progesterone receptor component 2	O15173;D3DNX8	2	4	3	17.8	26.17	247	2.9047e-28	0.40493	42024000	30063000	11961000
20-alpha-hydroxysteroid dehydrogenase;Aldo-keto reductase family 1 member C1;Chlordecone reductase homolog HAKRC;Dihydrodiol dehydrogenase 1/2;High-affinity hepatic bile acid-binding protein;Indanol dehydrogenase;Trans-1,2-dihydrobenzene-1,2-diol dehydrogenase;3-alpha-HSD3;Aldo-keto reductase family 1 member C2;Chlordecone reductase homolog HAKRD;Dihydrodiol dehydrogenase 2;Dihydrodiol dehydrogen…	AKR1C1;DDH;DDH1;AKR1C2;DDH2;AKR1C4;CHDR;RP11-69D4.1-003	Aldo-keto reductase family 1 member C1;aldo-keto reductase family 1 member C2-like isoform 1;aldo-keto reductase family 1 member C2-like isoform 2;Aldo-keto reductase family 1 member C2;Aldo-keto reductase family 1 member C4;cDNA FLJ52680, highly similar t	Q04828;P52895;P17516;B4DK69;Q5SR14;B5ME26;A6NHU4;B4E0M1;E9PBP5;Q96SD9	20	8	1	17	36.788	323	1.5173e-22	0.4064	152390000	101330000	51060000
Antigen p25;Chromobox protein homolog 5;Heterochromatin protein 1 homolog alpha;CBX5 protein	CBX5;HP1A	Chromobox protein homolog 5	P45973;Q6I9T7	1	1	1	5.8	22.225	191	0.00046808	0.40658	2226600	1172800	1053900
6-phosphofructokinase type C;6-phosphofructokinase, platelet type;Phosphofructo-1-kinase isozyme C;Phosphofructokinase 1;Phosphohexokinase;cDNA FLJ35278 fis, clone PROST2006579, highly similar to 6-phosphofructokinase type C (EC 2.7.1.11);Phosphofructokinase, platelet	PFKF;PFKP;RP11-298E9.2-004	6-phosphofructokinase type C;cDNA FLJ35278 fis, clone PROST2006579, highly similar to 6-phosphofructokinase type C	Q01813;B3KS15;Q5VSR7	11	9	9	12.4	85.595	784	2.9532e-76	0.40683	41884000	16736000	25147000
GCTM-2 antigen;Gp200;Podocalyxin;Podocalyxin-like protein 1;PODXL protein;cDNA FLJ31254 fis, clone KIDNE2005526, highly similar to Homo sapiens podocalyxin-like protein mRNA	PCLP;PCLP1;PODXL	PODXL protein;59 kDa protein;Podocalyxin-like isoform 2 precursor;54 kDa protein;55 kDa protein	O00592-1;O00592;B7ZKQ8;O00592-2;Q96N83	5	6	6	11.6	58.875	560	2.6288e-57	0.40949	56005000	37168000	18837000
Nuclear autoantigenic sperm protein;Nuclear autoantigenic sperm protein isoform 2 variant;NASP protein;cDNA FLJ53158, highly similar to Nuclear autoantigenic sperm protein;cDNA FLJ53176, highly similar to Nuclear autoantigenic sperm protein;Nuclear autoantigenic sperm protein (Histone-binding), isoform CRA_b;PRO1999;Nuclear autoantigenic sperm protein autosomal variant;Nuclear autoantigenic sperm…	NASP;hCG_40880;RP4-697E16.3-005;RP4-697E16.3-007;RP4-697E16.3-004	Isoform 3 of Nuclear autoantigenic sperm protein;Isoform 1 of Nuclear autoantigenic sperm protein;nuclear autoantigenic sperm protein isoform 4;cDNA FLJ53176, highly similar to Nuclear autoantigenic sperm protein;Isoform 2 of Nuclear autoantigenic sperm pr	P49321-3;P49321;Q53H03;P49321-1;Q6PJY7;B4DQP3;E9PNB5;B4DS57;Q9P1N1;P49321-2;O95138;Q5T626;Q5T627;Q5T624;E9PRH9	9	2	2	2.3	86.267	790	5.4208e-05	0.41046	4161800	2594800	1567000
5T4 oncofetal antigen;5T4 oncofetal trophoblast glycoprotein;M6P1;Trophoblast glycoprotein;cDNA FLJ78281, highly similar to Homo sapiens trophoblast glycoprotein (TPBG), mRNA;cDNA FLJ90309 fis, clone NT2RP2000903, highly similar to Trophoblast glycoprotein	5T4;TPBG;hCG_401114	Trophoblast glycoprotein	Q13641;A8K555	1	4	4	8.6	46.031	420	1.9821e-12	0.41079	22756000	12448000	10308000
250/210 kDa paraneoplastic pemphigus antigen;Desmoplakin;cDNA FLJ51487, highly similar to Desmoplakin;DSP variant protein;cDNA FLJ53584, highly similar to Desmoplakin;cDNA FLJ61543, highly similar to Desmoplakin	DSP;DSP variant protein	Isoform DPI of Desmoplakin;Desmoplakin Ia;Isoform DPII of Desmoplakin;cDNA FLJ61543, highly similar to Desmoplakin	P15924-1;P15924;D7RX09;P15924-2;B4DWT7;Q4LE79;B4DKX6;B4E2A0	5	7	7	2.2	331.77	2871	6.5871e-09	0.41158	30357000	24275000	6082800
Intramembrane protease 1;Minor histocompatibility antigen H13;Presenilin-like protein 3;Signal peptide peptidase	H13;HM13;IMP1;MSTP086;PSL3;SPP	Isoform 2 of Minor histocompatibility antigen H13;Isoform 1 of Minor histocompatibility antigen H13;Isoform 5 of Minor histocompatibility antigen H13;Isoform 4 of Minor histocompatibility antigen H13	Q8TCT9-2;Q8TCT9;Q8TCT9-1;Q8TCT9-5;Q8TCT9-4	5	4	4	9.4	46.825	426	3.7147e-29	0.41217	14883000	9156200	5727200
		14 kDa protein		1	6	1	53.7	13.519	123	8.9503e-85	0.41263	20305000	14002000	6302700
Protein N8;Tumor protein D52;Prostate leucine zipper variant 1;Putative uncharacterized protein TPD52;Prostate leucine zipper variant 2;Prostate leucine zipper isoform 3;Prostate leucine zipper isoform 4	TPD52;PrLZ	Similar to Tumor protein D52;Isoform 3 of Tumor protein D52;Prostate leucine zipper variant 1;Prostate leucine zipper variant 2;Prostate leucine zipper isoform 3;Isoform 1 of Tumor protein D52;tumor protein D52 isoform 2;Isoform 2 of Tumor protein D52	P55327-3;P55327;D0UFD1;D3YTI0;D0UFD2;D0UFD3;P55327-1;C9J502;D0UFD4;E5RKB4;P55327-2	8	2	2	9	31.17	278	0.00080029	0.41288	1816200	997010	819150
5-phosphoribosylglycinamide transformylase;AIR synthase;GAR transformylase;Glycinamide ribonucleotide synthetase;Phosphoribosylamine--glycine ligase;Phosphoribosyl-aminoimidazole synthetase;Phosphoribosylformylglycinamidine cyclo-ligase;Phosphoribosylglycinamide formyltransferase;Phosphoribosylglycinamide synthetase;Trifunctional purine biosynthetic protein adenosine-3;Phosphoribosylglycinamide f…	GART;PGFT;PRGS	Isoform Long of Trifunctional purine biosynthetic protein adenosine-3;Isoform Short of Trifunctional purine biosynthetic protein adenosine-3;GARS protein;GARS-AIRS-GART (Fragment)	P22102-1;P22102;Q3B7A7;Q59HH3;P22102-2;Q15374;O14660	4	2	2	1.7	107.77	1010	0.00080414	0.41342	1875400	1021900	853500
Calcium-binding mitochondrial carrier protein Aralar1;Mitochondrial aspartate glutamate carrier 1;Solute carrier family 25 member 12;cDNA FLJ12766 fis, clone NT2RP2001520, highly similar to Calcium-binding mitochondrial carrier protein Aralar1;cDNA FLJ33752 fis, clone BRCAN2000364, highly similar to Calcium-binding mitochondrial carrier protein Aralar1	ARALAR1;SLC25A12	Calcium-binding mitochondrial carrier protein Aralar1;cDNA FLJ33752 fis, clone BRCAN2000364, highly similar to Calcium-binding mitochondrial carrier protein Aralar1	O75746;B3KMV8;B3KR64	3	6	3	9.3	74.761	678	2.3996e-19	0.41603	5129900	2525500	2604500
Polypyrimidine tract binding protein 1;Polypyrimidine tract binding protein 1, isoform CRA_c;57 kDa RNA-binding protein PPTB-1;Heterogeneous nuclear ribonucleoprotein I;Polypyrimidine tract-binding protein 1;Polypyrimidine tract binding protein 1, isoform CRA_e;Putative uncharacterized protein PTBP1	hCG_20560;PTBP1;PTB	polypyrimidine tract-binding protein 1 isoform a;Isoform 2 of Polypyrimidine tract-binding protein 1;Isoform 1 of Polypyrimidine tract-binding protein 1;polypyrimidine tract-binding protein 1 isoform d	Q9BUQ0;P26599-2;P26599;P26599-1;A6NLN1	4	1	1	2	59.632	557	0.0038474	0.41705	3283500	2312800	970720
Oligoribonuclease, mitochondrial;RNA exonuclease 2 homolog;Small fragment nuclease;cDNA, FLJ92319, highly similar to Homo sapiens REX2, RNA exonuclease 2 homolog (S. cerevisiae) (REXO2), mRNA;REX2, RNA exonuclease 2 homolog (S. cerevisiae);REX2, RNA exonuclease 2 homolog (S. cerevisiae), isoform CRA_b	CGI-114;REXO2;SFN;SMFN;hCG_38016	Isoform 1 of Oligoribonuclease, mitochondrial (Fragment);25 kDa protein;Protein;Isoform 2 of Oligoribonuclease, mitochondrial (Fragment);Protein;17 kDa protein;13 kDa protein	Q9Y3B8-1;Q9Y3B8;B2R532;Q9Y3B8-2	12	4	4	17.3	26.832	237	9.8997e-10	0.41825	6908300	4558600	2349700
Aldehyde dehydrogenase 5;Aldehyde dehydrogenase family 1 member B1;Aldehyde dehydrogenase X, mitochondrial;cDNA FLJ51238, highly similar to Aldehyde dehydrogenase X, mitochondrial (EC 1.2.1.3)	ALDH1B1;ALDH5;ALDHX	Aldehyde dehydrogenase X, mitochondrial;cDNA FLJ51238, highly similar to Aldehyde dehydrogenase X, mitochondrial	P30837;B4DLJ0	2	2	2	4.1	57.206	517	0.00017712	0.41929	1795200	1168500	626710
80K-H protein;Glucosidase 2 subunit beta;Glucosidase II subunit beta;Protein kinase C substrate 60.1 kDa protein heavy chain;cDNA FLJ59211, highly similar to Glucosidase 2 subunit beta;cDNA FLJ78273, highly similar to Homo sapiens protein kinase C substrate 80K-H (PRKCSH), transcript variant 2, mRNA;PRKCSH protein	G19P1;PRKCSH	cDNA FLJ59211, highly similar to Glucosidase 2 subunit beta;glucosidase 2 subunit beta isoform 2;PRKCSH protein (Fragment)	P14314;B4DJQ5;E7EQZ9;A8K318;A2VCQ4	3	11	11	18.1	60.134	535	1.8496e-55	0.42056	79099000	48125000	30974000
Sulfide:quinone oxidoreductase, mitochondrial;cDNA, FLJ93596, highly similar to Homo sapiens sulfide quinone reductase-like (yeast) (SQRDL), mRNA;Sulfide dehydrogenase like;PRO1975	CGI-44;SQRDL	Sulfide:quinone oxidoreductase, mitochondrial	Q9Y6N5;B2R7T6;Q53HW7;Q9UHS8	1	2	2	6.2	49.96	450	4.7509e-12	0.42227	3007300	1789600	1217700
Ras-related protein Rab-5A;cDNA, FLJ93000, Homo sapiens RAB5A, member RAS oncogene family (RAB5A), mRNA;Cervical cancer oncogene 10 protein;RAB5A protein;RAB5A, member RAS oncogene family, isoform CRA_a;cDNA FLJ51867, highly similar to Ras-related protein Rab-5A	RAB5;RAB5A;HCC-10;hCG_1776267	Ras-related protein Rab-5A;cDNA FLJ51867, highly similar to Ras-related protein Rab-5A	P20339;Q6FI44;B4DJA5	2	3	2	16.3	23.658	215	5.8079e-05	0.42245	3068200	981440	2086800
Cleavage and polyadenylation specificity factor 25 kDa subunit;Cleavage and polyadenylation specificity factor subunit 5;Nucleoside diphosphate-linked moiety X motif 21;Pre-mRNA cleavage factor Im 25 kDa subunit;cDNA, FLJ93125, highly similar to Homo sapiens cleavage and polyadenylation specific factor 5, 25 kDa(CPSF5), mRNA	CFIM25;CPSF25;CPSF5;NUDT21	Cleavage and polyadenylation specificity factor subunit 5	O43809;B2R6U8	1	2	2	7.5	26.227	227	0.0032971	0.42464	2758200	1402400	1355800
DNase IV;Flap endonuclease 1;Flap structure-specific endonuclease 1;Maturation factor 1;cDNA FLJ51365, highly similar to Flap endonuclease 1 (EC 3.1.-.-);cDNA, FLJ93171, Homo sapiens flap structure-specific endonuclease 1 (FEN1), mRNA;FEN1 protein	FEN1;RAD2;hCG_40848	Flap endonuclease 1	P39748;B4DWZ4;Q6FHX6	2	3	2	7.1	42.592	380	0.00021147	0.42503	5915200	3488600	2426500
cDNA FLJ52364, highly similar to Heat-shock protein 105 kDa;Heat shock 105kDa/110kDa protein 1, isoform CRA_b;Antigen NY-CO-25;Heat shock 110 kDa protein;Heat shock protein 105 kDa;cDNA FLJ55325, highly similar to Heat-shock protein 105 kDa;cDNA FLJ52360, highly similar to Heat-shock protein 105 kDa;cDNA FLJ51707, highly similar to Heat-shock protein 105 kDa	hCG_32198;HSPH1;HSP105;HSP110;KIAA0201	cDNA FLJ52364, highly similar to Heat-shock protein 105 kDa;Isoform Alpha of Heat shock protein 105 kDa;Isoform 3 of Heat shock protein 105 kDa;Isoform Beta of Heat shock protein 105 kDa;cDNA FLJ52360, highly similar to Heat-shock protein 105 kDa;cDNA FLJ5	B4DYH1;Q92598-1;Q92598;B4DF68;Q92598-3;Q92598-2;B4DY72;B4DZB4;E7EUG1	7	3	3	3.3	97.459	860	2.4293e-05	0.42557	3528100	1995600	1532500
High mobility group protein 2a;High mobility group protein 4;High mobility group protein B3;Non-histone chromosomal protein	HMG2A;HMG4;HMGB3	high mobility group protein B3-like;high mobility group protein B3-like;High mobility group protein B3;Uncharacterized protein;Uncharacterized protein;high mobility group protein B3-like isoform 1, partial;Uncharacterized protein	O15347;E7EQU1;E7ES08;E9PES6;Q16466	7	1	1	6.2	23.744	208	0.0087707	0.42587	4750800	1662800	3088000
L1880;RAB5L;Ras-related protein Rab-5C	RAB5C;RABL	Ras-related protein Rab-5C	P51148	4	3	2	16.2	23.482	216	1.2736e-21	0.42675	8010700	5341000	2669700
Heat shock 70 kDa protein 8;Heat shock cognate 71 kDa protein;cDNA FLJ38781 fis, clone LIVER2000216, highly similar to HEAT SHOCK COGNATE 71 kDa PROTEIN;cDNA FLJ55485, highly similar to Heat shock cognate 71 kDa protein;Heat shock 70kDa protein 8 isoform 1 variant;HSPA8 protein;Heat shock 70kDa protein 8 isoform 2 variant;Heat shock-related 70 kDa protein 2;cDNA FLJ59163, highly similar to Heat s…	HSC70;HSP73;HSPA10;HSPA8;HSPA2	Isoform 1 of Heat shock cognate 71 kDa protein;Uncharacterized protein;Uncharacterized protein;Uncharacterized protein;Heat shock-related 70 kDa protein 2;Uncharacterized protein;cDNA FLJ59163, highly similar to Heat shock cognate 71 kDa protein;Uncharacte	P11142-1;P11142;B3KTV0;B4E1Q1;Q53GZ6;Q96IS6;E9PKE3;P11142-2;E7ET08;Q53HF2;E9PNE6;P54652;E9PN89;B4DTX2;E9PLF4	20	21	14	34.4	70.897	646	1.6621e-229	0.42718	258690000	165170000	93521000
cDNA FLJ60124, highly similar to Mitochondrial dicarboxylate carrier;Mitochondrial dicarboxylate carrier;Solute carrier family 25 member 10;cDNA FLJ61034, highly similar to Mitochondrial dicarboxylate carrier;39S ribosomal protein L12, mitochondrial;5c5-2;Mitochondrial ribosomal protein L12;5C5;Mitochondrial ribosomal protein L7/L12	DIC;SLC25A10;MRPL12;RPML12;MRPL7/L12	cDNA FLJ60124, highly similar to Mitochondrial dicarboxylate carrier;Isoform 2 of Mitochondrial dicarboxylate carrier;Isoform 1 of Mitochondrial dicarboxylate carrier;cDNA FLJ61034, highly similar to Mitochondrial dicarboxylate carrier;39S ribosomal protei	B4DLN1;Q9UBX3-2;Q9UBX3;Q9UBX3-1;B4E1E9;P52815;A4UCS1;E7ETZ5;Q15693;Q96Q74	6	6	6	13.1	48.099	442	8.1374e-29	0.42801	28465000	20708000	7757100
Aspartate beta-hydroxylase;Aspartyl/asparaginyl beta-hydroxylase;Peptide-aspartate beta-dioxygenase;cDNA FLJ77157, highly similar to Homo sapiens aspartate beta-hydroxylase (ASPH), transcript variant 3, mRNA;Aspartate beta-hydroxylase isoform f;cDNA FLJ54576, highly similar to Aspartyl/asparaginyl beta-hydroxylase (EC 1.14.11.16);ASPH protein;Aspartate beta-hydroxylase, isoform CRA_b;Junctate;cDN…	ASPH;hCG_1787219	Isoform 1 of Aspartyl/asparaginyl beta-hydroxylase;aspartyl/asparaginyl beta-hydroxylase isoform f;aspartyl/asparaginyl beta-hydroxylase isoform j;Uncharacterized protein;Isoform Junctate of Aspartyl/asparaginyl beta-hydroxylase;aspartyl/asparaginyl beta-h	Q12797-1;Q12797;A8K721;B3GQE5;B8Y0L3;B4E2K4;Q6PJH4;E5RG56;Q12797-2;Q9H291;B7ZM95;B4DQ07;B7ZM96;Q8TB28;B4DIC9;Q12797-3;Q12797-4;Q6NXR7;E5RG29;E5RHK2;E5RHJ2	18	2	2	3.2	85.862	758	1.6039e-15	0.4292	2122000	1395000	727030
Methionine adenosyltransferase 2;Methionine adenosyltransferase II;S-adenosylmethionine synthase isoform type-2;S-adenosylmethionine synthetase	AMS2;MAT2A;MATA2;hCG_34602	S-adenosylmethionine synthase isoform type-2;S-adenosylmethionine synthase	P31153;B4DEX8;B4DN45	2	4	4	10.9	43.66	395	5.4325e-23	0.43336	19962000	7388300	12574000
5-methylthioadenosine phosphorylase;S-methyl-5-thioadenosine phosphorylase;cDNA FLJ59758, highly similar to S-methyl-5-thioadenosine phosphorylase (EC 2.4.2.28);MTAP protein	MSAP;MTAP	cDNA FLJ59758, highly similar to S-methyl-5-thioadenosine phosphorylase	Q13126;B4DUC8;Q05DJ2;Q6FHP1;Q6FHT1	2	3	3	8.3	33.186	300	5.4302e-05	0.43423	4048900	2793500	1255400
Calumenin, isoform CRA_c;cDNA FLJ31776 fis, clone NT2RI2008141, highly similar to CALUMENIN;cDNA FLJ90381 fis, clone NT2RP2005035, highly similar to Calumenin;Calumenin;Crocalbin;IEF SSP 9302;CALU protein;Calumenin, isoform CRA_b;cDNA, FLJ92797, Homo sapiens calumenin (CALU), mRNA;cDNA FLJ14554 fis, clone NT2RM2001839, highly similar to Calumenin;cDNA FLJ90608 fis, clone PLACE1001777, highly simi…	CALU;hCG_41656;tcag7.422	calumenin isoform c precurosr;Isoform 1 of Calumenin;calumenin isoform d precursor;Isoform 2 of Calumenin;Calumenin isoform 6;calumenin isoform e precursor;calumenin isoform f	B3KPG9;B3KQF5;D6QS49;D6QS56;D6QS57;D6QS58;O43852-1;O43852;D6QS59;Q6IAW5;B3KNG6;D6QS48;O43852-2;D6QS50;D6QS54;B3KQK3	10	5	5	14.9	38.05	323	1.582e-17	0.43477	41582000	23897000	17685000
Macropain subunit C9;Multicatalytic endopeptidase complex subunit C9;Proteasome component C9;Proteasome subunit alpha type-4;Proteasome subunit L;Proteasome subunit alpha type;Proteasome subunit beta type;PSMA4 protein	HC9;PSC9;PSMA4	Proteasome subunit alpha type-4;proteasome subunit alpha type-4 isoform 2	P25789;B2RDG0;Q7Z474;Q567Q5	2	3	3	9.6	29.483	261	3.717e-05	0.43658	15960000	10512000	5447900
Copine III;Copine-3;CPNE3 protein	CPN3;CPNE3;KIAA0636	Copine-3;Uncharacterized protein;Uncharacterized protein	O75131;Q05DL8;E5RG68;E5RHZ0	19	3	3	5	60.13	537	0.002098	0.4381	4551100	2286700	2264300
Actin-binding protein 280;Alpha-filamin;Endothelial actin-binding protein;Filamin-1;Filamin-A;Non-muscle filamin;Filamin A;FLNA protein;FLJ00119 protein;Filamin A, alpha (Actin binding protein 280);Putative uncharacterized protein FLNA	FLN;FLN1;FLNA;FLJ00119;XX-FW83128A1.1-010	Isoform 1 of Filamin-A;Isoform 2 of Filamin-A;Filamin A, alpha;Uncharacterized protein	P21333-1;P21333;E9KL45;Q60FE5;P21333-2;Q60FE6;Q6NXF2;Q8TES4;Q5HY54;Q96C61;A6NDY9;B2ZZ80	8	11	8	4	280.74	2647	2.4025e-17	0.43917	8345800	4309100	4036800
Heat shock 84 kDa;Heat shock protein HSP 90-beta;cDNA FLJ77842;cDNA FLJ53619, highly similar to Heat shock protein HSP 90-beta;cDNA FLJ54023, highly similar to Heat shock protein HSP 90-beta;HSP90AB1 protein;cDNA: FLJ21717 fis, clone COL10322;Heat shock protein 90-beta c;Putative heat shock protein HSP 90-beta-3	HSP90AB1;HSP90B;HSPC2;HSPCB;HSP90AB3P;HSP90BC	Heat shock protein HSP 90-beta;Putative heat shock protein HSP 90-beta-3	P08238;A8K3W9;B4DGL0;B4DMA2;Q6PK50;Q9H6X9;Q58FF7	13	20	10	28.7	83.263	724	6.4502e-206	0.43945	379430000	222100000	157340000
Rho cDNA clone 9;Rho-related GTP-binding protein RhoC;Ras homolog gene family, member C;Choline phosphatase 6;Phosphatidylcholine-hydrolyzing phospholipase D6;Phospholipase D6;Rho cDNA clone 12;Transforming protein RhoA;cDNA FLJ57740, highly similar to Transforming protein RhoA;ARHA protein	ARH9;ARHC;RHOC;RP11-426L16.4-008;PLD6;ARH12;ARHA;RHO12;RHOA	Uncharacterized protein;Rho-related GTP-binding protein RhoC;Ras homolog gene family, member C;Mitochondrial cardiolipin hydrolase;Transforming protein RhoA	E9PN11;P08134;Q5JR08;Q8N2A8;P61586;B4DKN9;Q9BVT0	5	2	2	6.1	25.485	229	0.014101	0.43967	4552800	2611700	1941100
49 kDa TATA box-binding protein-interacting protein;54 kDa erythrocyte cytosolic protein;INO80 complex subunit H;Nuclear matrix protein 238;Pontin 52;RuvB-like 1;TIP49a;TIP60-associated protein 54-alpha;cDNA FLJ34844 fis, clone NT2NE2011154, highly similar to RuvB-like 1	INO80H;NMP238;RUVBL1;TIP49;TIP49A	Isoform 1 of RuvB-like 1;Isoform 2 of RuvB-like 1;Uncharacterized protein	Q9Y265-1;Q9Y265;B5BUB1;Q9Y265-2;B3KRS7;E7ETR0	3	3	3	7.5	50.227	456	7.0303e-07	0.44056	4145300	2620300	1525000
Cyclophilin C;Peptidyl-prolyl cis-trans isomerase C;Rotamase C;Peptidyl-prolyl cis-trans isomerase	CYPC;PPIC	Peptidyl-prolyl cis-trans isomerase C	P45877;A8K2Q6	2	3	2	12.7	22.763	212	2.6769e-28	0.44058	2275500	1515600	759940
Dihydroorotate dehydrogenase, mitochondrial;Dihydroorotate oxidase;Putative uncharacterized protein DHODH	DHODH	Dihydroorotate dehydrogenase (quinone), mitochondrial;Uncharacterized protein	Q02127;A6NCA4	2	7	7	18.5	42.867	395	9.656e-23	0.44166	15588000	6471500	9116600
Cyclophilin B;CYP-S1;Peptidyl-prolyl cis-trans isomerase B;Rotamase B;S-cyclophilin	CYPB;PPIB	Peptidyl-prolyl cis-trans isomerase B	P23284	2	12	11	46.3	23.742	216	1.5214e-117	0.45381	835930000	585580000	250360000
Translin;Translin variant;cDNA FLJ34596 fis, clone KIDNE2009191, highly similar to TRANSLIN;Translin, isoform CRA_b;cDNA FLJ59957, highly similar to Translin	TSN;hCG_37642	Translin;Uncharacterized protein;Protein	Q15631;Q53GR3;B3KRM8;B7Z5D9;E9PGT1	3	2	2	9.6	26.183	228	0.00087934	0.45498	2957500	1944600	1012900
dCTP pyrophosphatase 1;Deoxycytidine-triphosphatase 1;RS21C6;XTP3-transactivated gene A protein	CDA03;DCTPP1;XTP3TPA	dCTP pyrophosphatase 1	Q9H773	1	1	1	7.6	18.681	170	0.0014957	0.46032	2280800	1644900	635920
Alpha-2-macroglobulin receptor-associated protein;Low density lipoprotein receptor-related protein-associated protein 1;cDNA FLJ78417, highly similar to Homo sapiens low density lipoprotein receptor-related protein associated protein 1 (LRPAP1), mRNA;cDNA, FLJ93097, highly similar to Homo sapiens low density lipoprotein receptor-related protein associated protein 1 (LRPAP1), mRNA	A2MRAP;LRPAP1	Alpha-2-macroglobulin receptor-associated protein	P30533;A8K8F6;B2R6S9	1	4	4	9.5	41.465	357	3.3932e-07	0.46259	23010000	14392000	8617700
cDNA FLJ44241 fis, clone THYMU3008436, highly similar to 6-phosphofructokinase, muscle type (EC 2.7.1.11);6-phosphofructokinase, muscle type;Phosphofructo-1-kinase isozyme A;Phosphofructokinase 1;Phosphohexokinase;cDNA FLJ56281, highly similar to 6-phosphofructokinase, muscle type (EC 2.7.1.11);Phosphofructokinase;PFKM protein	PFKM;PFKX	6-phosphofructokinase, muscle type isoform 1;Isoform 1 of 6-phosphofructokinase, muscle type;Isoform 2 of 6-phosphofructokinase, muscle type	Q6ZTT1;P08237-1;P08237;B4E162;P08237-2;E7ES70;P78457;Q7KYX9;Q96I60	3	2	2	1.9	93.253	851	0.005403	0.46277	5107500	2610600	2496900
Cytochrome c;Putative uncharacterized protein CYCS	CYC;CYCS	Cytochrome c;Uncharacterized protein	P99999;Q6LER6;C9JFR7	2	4	4	28.6	11.749	105	7.2462e-20	0.46297	184200000	118760000	65438000
Putative uncharacterized protein HPRT1;Hypoxanthine-guanine phosphoribosyltransferase;HPRT1 protein	HPRT1;HPRT	Uncharacterized protein;Hypoxanthine-guanine phosphoribosyltransferase	A8MSU4;P00492;Q6LET3	2	5	5	26.6	24.581	218	1.8443e-28	0.46348	52215000	31166000	21050000
Nucleosome assembly protein 1-like 4;Nucleosome assembly protein 1-like 4b;Putative uncharacterized protein NAP1L4;cDNA, FLJ92975, highly similar to Homo sapiens nucleosome assembly protein 1-like 4 (NAP1L4), mRNA;cDNA FLJ59403, highly similar to Nucleosome assembly protein 1-like 4;cDNA, FLJ79141, highly similar to Nucleosome assembly protein 1-like 4;cDNA, FLJ79223, highly similar to Nucleosome…	NAP1L4;NAP1L4b;NAP2	Uncharacterized protein;44 kDa protein;Nucleosome assembly protein 1-like 4;Uncharacterized protein;23 kDa protein;Uncharacterized protein;Uncharacterized protein;Uncharacterized protein	A8CGI3;A8MZ22;B2R6J4;B4DS05;B7ZAC7;B7ZAK9;B7ZB83;Q99733;C9JZI7;C9J6D1;E9PKT8;A8MXH2	8	1	1	2.8	44.078	386	0.0011524	0.46646	30284000	1779900	28504000
ATP synthase subunit delta, mitochondrial;F-ATPase delta subunit	ATP5D	ATP synthase subunit delta, mitochondrial	P30049	7	3	3	17.3	17.49	168	5.538e-32	0.46684	143230000	111090000	32139000
Aminopeptidase P3;Probable Xaa-Pro aminopeptidase 3;X-prolyl aminopeptidase (Aminopeptidase P) 3, putative	XPNPEP3;RP11-554C12.3-011	Isoform 1 of Probable Xaa-Pro aminopeptidase 3;Isoform 4 of Probable Xaa-Pro aminopeptidase 3;Isoform 2 of Probable Xaa-Pro aminopeptidase 3;Isoform 5 of Probable Xaa-Pro aminopeptidase 3;Isoform 3 of Probable Xaa-Pro aminopeptidase 3	Q9NQH7-1;Q9NQH7;Q9NQH7-4;B7ZBB4;Q9NQH7-2;Q9NQH7-5;Q9NQH7-3	5	4	3	6.5	57.033	507	6.9237e-06	0.46701	6191200	925100	5266100
Ras-related protein Rab-14	RAB14	Ras-related protein Rab-14;20 kDa protein	P61106	2	3	3	12.6	23.897	215	0.0013751	0.46711	5089900	3415600	1674300
cDNA FLJ61339, highly similar to Alanyl-tRNA synthetase (EC 6.1.1.7);Alanine--tRNA ligase;Alanyl-tRNA synthetase, cytoplasmic;Renal carcinoma antigen NY-REN-42	AARS	cDNA FLJ61339, highly similar to Alanyl-tRNA synthetase;Alanyl-tRNA synthetase, cytoplasmic	B4DR45;E7ETK8;P49588	2	5	5	4.6	109.29	992	2.5068e-08	0.47128	14005000	3141400	10863000
Rho GDP-dissociation inhibitor 1;Rho-GDI alpha	ARHGDIA;GDIA1	Rho GDP-dissociation inhibitor 1	P52565	1	2	2	12.7	23.207	204	1.5037e-15	0.47445	4214200	2658700	1555500
Reticulocalbin-1;cDNA FLJ55835, highly similar to Reticulocalbin-1;Proliferation-inducing gene 20 protein	RCN;RCN1	Reticulocalbin-1;cDNA FLJ55835, highly similar to Reticulocalbin-1;Uncharacterized protein;Uncharacterized protein	Q15293;B7Z1M1;Q5J7V8;E9PJD5;E9PNT6	5	6	6	18.4	38.89	331	2.02e-40	0.47517	33746000	20535000	13211000
HINT-3;Histidine triad nucleotide-binding protein 2, mitochondrial;HIT-17kDa;PKCI-1-related HIT protein;PKCI-1-related HIT protein variant;Protein kinase C inhibitor-2	HINT2	Histidine triad nucleotide-binding protein 2, mitochondrial	Q9BX68;Q53HJ8;Q8WYJ5	1	2	2	15.3	17.162	163	3.0607e-11	0.47673	27425000	20976000	6448400
U2 small nuclear ribonucleoprotein B;Small nuclear ribonucleoprotein polypeptide B;Similar to small nuclear ribonucleoprotein polypeptide B	SNRPB2	U2 small nuclear ribonucleoprotein B	P08579;B5BTZ8;Q86YK2	1	1	1	4.9	25.486	225	0.00011282	0.47713	1362500	713820	648730
B5;Dolichyl-diphosphooligosaccharide--protein glycosyltransferase subunit STT3A;Integral membrane protein 1;Transmembrane protein TMC;cDNA FLJ58575, highly similar to Dolichyl-diphosphooligosaccharide--protein glycosyltransferase subunit STT3A (EC 2.4.1.119)	ITM1;STT3A;TMC	Dolichyl-diphosphooligosaccharide--protein glycosyltransferase subunit STT3A;Uncharacterized protein	P46977;B4DJ24;E9PNQ1	5	5	5	6.7	80.529	705	1.8608e-11	0.48185	12661000	6392000	6269400
NACHT, LRR and PYD domains-containing protein 8;Nucleotide-binding oligomerization domain protein 16;PYRIN and NACHT-containing protein 4;Leucine-rich repeat-containing protein 16B;G-protein coupled receptor 48;Leucine-rich repeat-containing G-protein coupled receptor 4;Putative uncharacterized protein LGR4;Leucine-rich repeat-containing G protein-coupled receptor 4 variant;LGR4 protein;Leucine-r…	NALP8;NLRP8;NOD16;PAN4;C14orf121;LRRC16B;GPR48;LGR4;LRRC36;RORBP70;IGFALS;ALS;LRR1;PPIL5	>IPI:IPI00795887.2|SWISS-PROT:Q86W28-1|ENSEMBL:ENSP00000291971|REFSEQ:NP_789781 Tax_Id=9606 Gene_Symbol=NLRP8 Isoform 1 of NACHT, LRR and PYD domains-containing protein 8;>IPI:IPI00219557.4|SWISS-PROT:Q86W28-2|H-INV:HIT000084795 Tax_Id=9606 Gene_Symbol=NLR	Q86W28-1;Q86W28;Q86W28-2;Q8ND23-1;Q8ND23;Q9BXB1;C9JCH9;Q59ER8;Q8N537;Q1X8D7-1;Q1X8D7;B0AZL7;B4DZY8;E9PGU3;Q8TAY0;P35858;Q96L50-1;Q96L50	9	2	2	1.5	119.43	1048	0.079655	0.48293	4573100	2949900	1623200
Microsomal glutathione S-transferase 1;Microsomal GST-I;MGST1 protein	GST12;MGST;MGST1	Microsomal glutathione S-transferase 1;MGST1 protein (Fragment);10 kDa protein;9 kDa protein;9 kDa protein	P10620;Q6LET6	6	3	3	16.8	17.598	155	1.6547e-26	0.48658	15039000	10170000	4868700
Actin-related protein 2/3 complex subunit 5-like protein;Arp2/3 complex 16 kDa subunit 2;Actin-related protein 2/3 complex subunit 5;Arp2/3 complex 16 kDa subunit	ARPC5L;ARC16;ARPC5;RP1-127C7.3-004	Actin-related protein 2/3 complex subunit 5-like protein;Isoform 2 of Actin-related protein 2/3 complex subunit 5;Isoform 1 of Actin-related protein 2/3 complex subunit 5;Actin-related protein 2/3 complex subunit 5;Actin-related protein 2/3 complex subunit	Q9BPX5;B3KPC7;O15511-2;O15511;O15511-1;B1ALC0;B3KTE1	6	2	2	13.1	16.941	153	0.0028315	0.488	1092700	850190	242480
Acyl-coenzyme A thioesterase 13;Thioesterase superfamily member 2	ACOT13;HT012;PNAS-27;THEM2	Acyl-coenzyme A thioesterase 13;acyl-coenzyme A thioesterase 13 isoform 2	Q9NPJ3	2	2	2	15.7	14.96	140	2.7538e-19	0.48907	21650000	15049000	6601300
cDNA FLJ56389, highly similar to Elongation factor 1-gamma;eEF-1B gamma;Elongation factor 1-gamma;Eukaryotic translation elongation factor 1 gamma;EEF1G protein;Eukaryotic translation elongation factor 1 gamma, isoform CRA_c;GIG35;cDNA FLJ59433, highly similar to Elongation factor 1-gamma	EEF1G;EF1G;PRO1608;hCG_2039458	cDNA FLJ56389, highly similar to Elongation factor 1-gamma;Elongation factor 1-gamma;cDNA FLJ59433, highly similar to Elongation factor 1-gamma	B4DTG2;P26641;Q2F840;Q53YD7;B4DUP0	6	10	10	15	56.149	487	3.1753e-35	0.48951	77482000	47442000	30039000
Endoplasmic reticulum resident protein 18;Endoplasmic reticulum resident protein 19;hTLP19;Thioredoxin domain-containing protein 12;Thioredoxin-like protein p19	TLP19;TXNDC12;UNQ713/PRO1376	Thioredoxin domain-containing protein 12	O95881	1	2	2	9.3	19.206	172	0.00018466	0.48988	23575000	16901000	6673700
Mammalian ependymin-related protein 1;Upregulated in colorectal cancer gene 1 protein;Ependymin related protein 1 (Zebrafish), isoform CRA_b;Upregulated in colorectal cancer gene 1;Mammalian ependymin related protein 1	EPDR1;MERP1;UCC1;hCG_16680;tcag7.449	mammalian ependymin-related protein 1 precursor;Mammalian ependymin related protein 1	Q9UM22-1;Q9UM22;A4D1W8;Q9UM22-2;Q96J80	2	2	2	6.1	38.15	344	1.1727e-06	0.48995	11447000	9527200	1919500
Sideroflexin-1;Tricarboxylate carrier protein	SFXN1	Sideroflexin-1	Q9H9B4	4	6	6	20.2	35.619	322	2.0478e-95	0.49222	73839000	49559000	24280000
Neuroendocrine-specific protein;Reticulon-1;Reticulon 1 isoform A;RTN1 protein;cDNA FLJ76256, highly similar to Homo sapiens reticulon 1 (RTN1), transcript variant 3, mRNA;cDNA FLJ55108, highly similar to Reticulon-1;Putative uncharacterized protein RTN1;Neuroendocrine-specific protein-like 2;Neuroendocrine-specific protein-like II;Reticulon-3;cDNA FLJ52565, highly similar to Reticulon-3;cDNA FLJ…	NSP;RTN1;ASYIP;NSPL2;RTN3;hCG_1775344	Isoform RTN1-A of Reticulon-1;RTN1 protein;Isoform RTN1-B of Reticulon-1;Isoform RTN1-C of Reticulon-1;Uncharacterized protein;Isoform 5 of Reticulon-3;cDNA FLJ52565, highly similar to Reticulon-3;20 kDa protein;cDNA FLJ59931, highly similar to Reticulon-3	Q16799-1;Q16799;Q2L7A7;Q2NKQ5;Q16799-2;Q16799-3;A8K3B9;B7Z4K5;Q6IAX4;A8MT72;O95197-5;O95197;B7Z4M0;B7Z4M1	9	2	1	2.1	83.617	776	1.1518e-09	0.49247	3414700	2176200	1238500
B(2)GCN homolog;B4 integrin interactor;CAB;Eukaryotic translation initiation factor 6;p27(BBP)	EIF3A;EIF6;ITGB4BP;OK/SW-cl.27;RP4-614O4.1-005	Eukaryotic translation initiation factor 6;eukaryotic translation initiation factor 6 isoform c	P56537;B7ZBG9	3	3	3	14.3	26.599	245	2.5146e-08	0.4944	5958400	3737000	2221300
Heat shock 70 kDa protein 1/2;Heat shock 70 kDa protein 1A/1B;cDNA FLJ75127, highly similar to Homo sapiens heat shock 70kDa protein 1A, mRNA;Heat shock 70kDa protein 1A;Heat shock 70kDa protein 1B;cDNA FLJ54370, highly similar to Heat shock 70 kDa protein 1;Heat shock 70kDa protein 1A variant;cDNA FLJ54392, highly similar to Heat shock 70 kDa protein 1;Heat shock protein 72;cDNA FLJ38698 fis, cl…	HSPA1;HSPA1A;HSPA1B;DAAP-21F2.7-001;DAAP-21F2.8-001;DADB-333F21.2-001;DADB-333F21.4-001;hCG_1820593;hCG_43726;HSP70-1;DAAP-21F2.8-002;DADB-333F21.4-002;DAQB-147D11.2-002;XXbac-BCX40G17.4-002;XXbac-BPG254B15.2-002	Heat shock 70 kDa protein 1A/1B;cDNA FLJ54370, highly similar to Heat shock 70 kDa protein 1;68 kDa protein;cDNA FLJ54392, highly similar to Heat shock 70 kDa protein 1;cDNA FLJ54328, highly similar to Heat shock 70 kDa protein 1;cDNA FLJ54407, highly simi	P08107;A8K5I0;B4DNT8;Q59EJ3;B4DWK5;Q9UQC1;B3KTT5;B4DI39;B4DVU9;B4E1S9;Q5SP16;B4E388;E7EP94;B4DNX1;B4E1T6	9	16	1	24.2	70.051	641	1.7538e-188	0.49583	76676000	42612000	34064000
Complex I-ESSS;NADH dehydrogenase [ubiquinone] 1 beta subcomplex subunit 11, mitochondrial;NADH-ubiquinone oxidoreductase ESSS subunit;Neuronal protein 17.3;Neuronal protein	NDUFB11;UNQ111/PRO1064	Isoform 2 of NADH dehydrogenase [ubiquinone] 1 beta subcomplex subunit 11, mitochondrial;Neuronal protein;Isoform 1 of NADH dehydrogenase [ubiquinone] 1 beta subcomplex subunit 11, mitochondrial	Q9NX14-2;Q9NX14;Q7Z4X2;Q9NX14-1	3	1	1	6.7	18.364	163	0.0078836	0.49822	14590000	10701000	3888800
Endosomal adaptor protein p14;Late endosomal/lysosomal Mp1-interacting protein;Mitogen-activated protein-binding protein-interacting protein;Roadblock domain-containing protein 3;Mitogen-activated protein-binding protein-interacting protein (MAPBPIP)	HSPC003;MAPBPIP;ROBLD3;RP11-336K24.9;RP11-336K24.9-002	Isoform 2 of Ragulator complex protein LAMTOR2;Isoform 1 of Ragulator complex protein LAMTOR2;Isoform 3 of Ragulator complex protein LAMTOR2	Q9Y2Q5-2;Q9Y2Q5;Q9Y2Q5-1;Q9Y2Q5-3;Q5VY98	3	2	2	15.3	15.609	150	4.4347e-07	0.49951	2780600	1546100	1234400
Isochorismatase domain-containing protein 1;CGI-111 protein	CGI-111;ISOC1	Isochorismatase domain-containing protein 1;Uncharacterized protein;CGI-111 protein;Uncharacterized protein;Uncharacterized protein	Q96CN7;E7ENF9;Q9Y3B5;D6RE73;D6RGE2	5	2	2	7.4	32.236	298	0.00034379	0.49953	2828600	1651300	1177300
ER-Golgi intermediate compartment 53 kDa protein;Gp58;Intracellular mannose-specific lectin MR60;Lectin mannose-binding 1;Protein ERGIC-53;LMAN1 protein;cDNA, FLJ93313, highly similar to Homo sapiens lectin, mannose-binding, 1 (LMAN1), mRNA;cDNA FLJ57897, highly similar to ERGIC-53 protein;Lectin, mannose-binding, 1 variant	ERGIC53;F5F8D;LMAN1	Protein ERGIC-53	P49257;A0PJ85;B2R774;B4DVV0;Q53FS4	1	4	4	7.3	57.548	510	1.1844e-06	0.49954	9526300	3758900	5767400
155 kDa nucleoporin;Nuclear pore complex protein Nup155;Nucleoporin Nup155;cDNA FLJ56637, highly similar to Nuclear pore complex protein Nup155;cDNA FLJ11241 fis, clone PLACE1008603, highly similar to Nuclear pore complex protein Nup155	KIAA0791;NUP155	Isoform 1 of Nuclear pore complex protein Nup155;cDNA FLJ56637, highly similar to Nuclear pore complex protein Nup155;Isoform 2 of Nuclear pore complex protein Nup155;Uncharacterized protein	O75694-1;O75694;B4DLT2;O75694-2;B3KMK3;E9PF10	4	3	3	1.7	155.2	1391	0.0001454	0.50107	4704000	3854500	849510
Leukocyte elastase inhibitor;Monocyte/neutrophil elastase inhibitor;Peptidase inhibitor 2;Serpin B1;cDNA FLJ53963, highly similar to Leukocyte elastase inhibitor;cDNA FLJ57130, highly similar to Leukocyte elastase inhibitor	ELANH2;MNEI;PI2;SERPINB1	Leukocyte elastase inhibitor;cDNA FLJ53963, highly similar to Leukocyte elastase inhibitor;cDNA FLJ57130, highly similar to Leukocyte elastase inhibitor	P30740;B4E3A8;B4DNT0	3	5	5	12.4	42.741	379	1.506e-07	0.50396	6528600	3270300	3258400
Synaptobrevin-2;Vesicle-associated membrane protein 2;Cellubrevin;Synaptobrevin-3;Vesicle-associated membrane protein 3;cDNA, FLJ92013, Homo sapiens vesicle-associated membrane protein 3 (cellubrevin)(VAMP3), mRNA;VAMP3 protein;Vesicle-associated membrane protein 3 (Cellubrevin);cDNA FLJ61298, highly similar to Vesicle-associated membrane protein 1;cDNA FLJ57686, highly similar to Vesicle-associa…	SYB2;VAMP2;SYB3;VAMP3;hCG_21813;SYB1;VAMP1	13 kDa protein;Vesicle-associated membrane protein 2;Vesicle-associated membrane protein 3;cDNA FLJ61298, highly similar to Vesicle-associated membrane protein 1;cDNA FLJ57686, highly similar to Vesicle-associated membrane protein 1;Isoform 1 of Vesicle-as	P63027;Q15836;Q6FGG2;Q9BRV4;B4DJY5;B4DZX9;P23763-1;P23763;A8K0D3;P23763-3;P23763-2	10	2	2	20.3	12.934	118	2.4414e-40	0.50503	18027000	12032000	5995800
Transmembrane protein 9;cDNA FLJ54226, highly similar to Transmembrane protein 9;TMEM9 protein;Dermal papilla-derived protein 4	RP5-894H24.1-010;TMEM9;RP5-894H24.1-001;DERP4;HSPC186;PSEC0012;UNQ631/PRO1248	cDNA FLJ54226, highly similar to Transmembrane protein 9;Transmembrane protein 9;Transmembrane protein 9	B1ALM4;B4E1H4;B1ALM5;Q6FIF9;Q6IAJ3;Q9P0T7	3	1	1	6.2	23.387	208	5.2644e-09	0.50563	1537200	772570	764590
CD63 antigen;Granulophysin;Lysosomal-associated membrane protein 3;Melanoma-associated antigen ME491;Ocular melanoma-associated antigen;OMA81H;Tetraspanin-30;Putative uncharacterized protein CD63;Lysosome-associated membrane protein-3 variant	CD63;MLA1;TSPAN30	CD63 antigen;CD63 antigen isoform B;Lysosome-associated membrane protein-3 variant	P08962;C9JV86;Q8N6Z9	3	2	2	7.6	25.636	238	3.6098e-06	0.50706	11749000	7497200	4252300
Endothelin-converting enzyme 1;Endothelin converting enzyme 1, isoform CRA_e;Endothelin-converting enzyme-1c;cDNA FLJ59212, highly similar to Endothelin-converting enzyme 1 (EC 3.4.24.71);Endothelin converting enzyme 1	ECE1;hCG_38869;RP3-329E20.1-008	Isoform B of Endothelin-converting enzyme 1;Isoform D of Endothelin-converting enzyme 1;Isoform A of Endothelin-converting enzyme 1;Isoform C of Endothelin-converting enzyme 1;cDNA FLJ59212, highly similar to Endothelin-converting enzyme 1	P42892-1;P42892;P42892-4;P42892-2;P42892-3;Q2Z2K8;B4DKB2;E9PDM6;Q5THM6	5	5	5	5.5	87.163	770	4.3583e-12	0.50715	58041000	31287000	26754000
14-3-3 protein beta/alpha;14-3-3 protein beta/alpha, N-terminally processed;Protein 1054;Protein kinase C inhibitor protein 1;Tyrosine 3-monooxygenase/tryptophan 5-monooxygenase activation protein, beta polypeptide;Tyrosine 3-monooxygenase/tryptophan 5-monooxygenase activation protein, beta polypeptide variant	YWHAB;RP1-148E22.1-004;RP1-148E22.1-003	Isoform Long of 14-3-3 protein beta/alpha;Isoform Short of 14-3-3 protein beta/alpha;Tyrosine 3-monooxygenase/tryptophan 5-monooxygenase activation protein, beta polypeptide;Tyrosine 3-monooxygenase/tryptophan 5-monooxygenase activation protein, beta polyp	P31946-1;P31946;B5BU24;P31946-2;Q4VY19;Q59EQ2;Q4VY20	4	11	4	41.1	28.082	246	5.3354e-65	0.50729	30041000	19596000	10445000
Alpha-NAC;Nascent polypeptide-associated complex subunit alpha;cDNA FLJ33331 fis, clone BRACE2000489, highly similar to Nascent polypeptide-associated complex subunit alpha;cDNA, FLJ92170, Homo sapiens nascent-polypeptide-associated complex alpha polypeptide (NACA), mRNA;HCG2016482, isoform CRA_b;Putative uncharacterized protein NACA;cDNA FLJ53704, moderately similar to Nascent polypeptide-associ…	HSD48;NACA;hCG_2016482	nascent polypeptide-associated complex subunit alpha isoform a;Nascent polypeptide-associated complex subunit alpha;cDNA FLJ53704, moderately similar to Nascent polypeptide-associated complex subunit alpha	E9PAV3;Q13765;B2R4P8;B4DDI8	3	3	3	2	205.42	2078	1.1378e-44	0.50857	3744300	2495500	1248800
B-cell receptor-associated protein 31, isoform CRA_b;cDNA FLJ33051 fis, clone TRACH1000063, highly similar to B-cell receptor-associated protein 31;cDNA FLJ43643 fis, clone STOMA2008546, highly similar to B-cell receptor-associated protein 31;B-cell receptor-associated protein 31 variant;6C6-AG tumor-associated antigen;B-cell receptor-associated protein 31;p28;Protein CDM;Putative uncharacterized…	BCAP31;hCG_2004982;BAP31;DXS1357E	B-cell receptor-associated protein 31 isoform a;B-cell receptor-associated protein 31;Uncharacterized protein;Uncharacterized protein;Uncharacterized protein;Uncharacterized protein	B3KQ79;Q53G72;Q53HT6;P51572;C9J0M4;C9JQ75;C9JSP1;C9JMD7	7	10	10	22.4	34.752	313	3.7536e-29	0.50933	37879000	21609000	16270000
Interferon receptor 1-bound protein 4;Protein arginine N-methyltransferase 1;cDNA FLJ55610, highly similar to Protein arginine N-methyltransferase 1 (EC 2.1.1.-);Protein arginine methyltransferase 1 isoform 4;PRMT1 protein;cDNA FLJ60588, highly similar to Protein arginine N-methyltransferase 1 (EC 2.1.1.-)	HMT2;HRMT1L2;IR1B4;PRMT1	protein arginine N-methyltransferase 1 isoform 1;protein arginine N-methyltransferase 1 isoform 3;Isoform 3 of Protein arginine N-methyltransferase 1;Uncharacterized protein;cDNA FLJ60588, highly similar to Protein arginine N-methyltransferase 1;Protein;Un	Q99873-1;Q99873;B4E3C3;Q99873-2;Q5U8W9;Q8WUW5;Q99873-3;E9PKG1;B4DJ87;E9PIX6;E9PQ98;E9PNR9	10	3	3	8.4	42.461	371	5.4231e-15	0.51164	4671300	2621900	2049400
Insulin-regulated membrane aminopeptidase;Insulin-responsive aminopeptidase;Leucyl-cystinyl aminopeptidase;Leucyl-cystinyl aminopeptidase, pregnancy serum form;Oxytocinase;Placental leucine aminopeptidase;cDNA, FLJ94965, highly similar to Homo sapiens leucyl/cystinyl aminopeptidase (LNPEP), mRNA	LNPEP;OTASE	Isoform 1 of Leucyl-cystinyl aminopeptidase;Isoform 2 of Leucyl-cystinyl aminopeptidase;Isoform 3 of Leucyl-cystinyl aminopeptidase	Q9UIQ6-1;Q9UIQ6;B2RAK1;Q9UIQ6-2;Q9UIQ6-3	3	10	10	9.4	117.35	1025	2.8033e-46	0.51249	15986000	7995600	7990700
MIR-interacting saposin-like protein;Protein canopy homolog 2;Putative secreted protein Zsig9;Transmembrane protein 4	CNPY2;MSAP;TMEM4;UNQ1943/PRO4426;ZSIG9	Isoform 1 of Protein canopy homolog 2	Q9Y2B0-1;Q9Y2B0	2	4	4	25.8	20.652	182	8.9051e-88	0.51356	95853000	69796000	26058000
Dermal papilla-derived protein 2;Growth hormone-inducible transmembrane protein;Transmembrane BAX inhibitor motif-containing protein 5;cDNA FLJ59630, highly similar to Growth hormone-inducible transmembrane protein;cDNA FLJ54146, highly similar to Growth hormone-inducible transmembrane protein;GHITM protein;cDNA FLJ52959, highly similar to Growth hormone-inducible transmembrane protein;Growth hor…	DERP2;GHITM;My021;TMBIM5;UNQ244/PRO281;RP11-124L5.3-002;DKFZp566C0746	cDNA FLJ59630, highly similar to Growth hormone-inducible transmembrane protein;36 kDa protein;Growth hormone inducible transmembrane protein;PTD010	Q9H3K2;B4DPG9;B4DSV8;Q6FIA7;B4DNL0;Q5VT94;Q658I8;Q9P099;Q9Y6G2	4	2	2	6	37.535	348	2.2478e-06	0.51421	9179800	2214600	6965300
60S ribosomal protein L12;HCG21173, isoform CRA_a;Ribosomal protein L12 variant	RPL12;hCG_21173	Isoform 1 of 60S ribosomal protein L12;Isoform 2 of 60S ribosomal protein L12	P30050-1;P30050;D3DS95;Q59FI9;P30050-2	2	4	4	28.5	17.818	165	1.8928e-14	0.51499	13401000	6577100	6824300
Dihydrolipoamide dehydrogenase;Dihydrolipoyl dehydrogenase, mitochondrial;Glycine cleavage system L protein;cDNA FLJ56112, highly similar to Dihydrolipoyl dehydrogenase, mitochondrial (EC 1.8.1.4);Dihydrolipoyl dehydrogenase;cDNA FLJ50515, highly similar to Dihydrolipoyl dehydrogenase, mitochondrial (EC 1.8.1.4)	DLD;GCSL;LAD;PHE3	Dihydrolipoyl dehydrogenase, mitochondrial;cDNA FLJ56112, highly similar to Dihydrolipoyl dehydrogenase, mitochondrial;Dihydrolipoyl dehydrogenase;Dihydrolipoyl dehydrogenase;cDNA FLJ50515, highly similar to Dihydrolipoyl dehydrogenase, mitochondrial	P09622;B4DMK9;E9PEX6;B4DFL1;B4DT69;B4DHG0	7	7	7	13.6	54.177	509	1.1806e-45	0.51568	168780000	108370000	60406000
Puromycin-sensitive aminopeptidase;cDNA FLJ39390 fis, clone PLACE6004219, highly similar to Puromycin-sensitive aminopeptidase;cDNA FLJ56108, highly similar to Puromycin-sensitive aminopeptidase (EC 3.4.11.-);cDNA FLJ55506, highly similar to Puromycin-sensitive aminopeptidase (EC3.4.11.-);cDNA FLJ56052, highly similar to Puromycin-sensitive aminopeptidase (EC 3.4.11.-);cDNA FLJ53310, highly simil…	NPEPPS;PSA	Puromycin-sensitive aminopeptidase;Uncharacterized protein;cDNA FLJ53354, highly similar to Puromycin-sensitive aminopeptidase;85 kDa protein;cDNA FLJ38558 fis, clone HCHON2003327, highly similar to Puromycin-sensitive aminopeptidase	P55786;B3KU93;B7Z4B2;B7Z899;E9PLK3;B7Z1H4;B7Z1V9;B7Z463;B3KTP2;B4DGH6;E9PJ74	21	13	13	13.6	103.28	919	1.0498e-57	0.51602	35659000	18097000	17562000
PEF protein with a long N-terminal hydrophobic domain;Peflin;Penta-EF hand domain-containing protein 1	ABP32;PEF1;UNQ1845/PRO3573	Peflin	Q9UBV8	1	2	2	6.7	30.381	284	0.0015473	0.52255	3418300	1676200	1742100
Cytochrome c oxidase polypeptide VIc;Cytochrome c oxidase subunit 6C	COX6C	Cytochrome c oxidase subunit 6C	P09669	1	2	2	20	8.7813	75	0.00013545	0.52348	33941000	26445000	7496300
EP70-P-iso;SM-11044-binding protein;Transmembrane 9 superfamily member 3;cDNA FLJ59136, highly similar to Transmembrane 9 superfamily protein member 3;cDNA FLJ90343 fis, clone NT2RP2002824, highly similar to Transmembrane 9 superfamily protein member 3;TM9SF3 protein;cDNA FLJ14882 fis, clone PLACE1003537, weakly similar to ENDOSOMAL P24A PROTEIN;SM-11044 binding protein, isoform CRA_b;cDNA FLJ145…	SMBP;TM9SF3;UNQ245/PRO282;hCG_25781;RP11-34E5.1;RP11-34E5.1-003	Transmembrane 9 superfamily member 3;SM-11044 binding protein	Q9HD45;B4DN13;Q8NCC4;Q8WUB5;Q96JZ5;Q96K55;Q5TB53	2	2	2	3.2	67.887	589	6.4764e-06	0.52899	4874700	2145600	2729100
Protein RCC2;RCC1-like protein TD-60;Telophase disk protein of 60 kDa;RCC2 protein	KIAA1470;RCC2;TD60	Protein RCC2	Q9P258;A5PLK7	1	5	5	9	56.084	522	1.9424e-10	0.53524	13266000	5892400	7373600
Putative uncharacterized protein ARPC4;Actin-related protein 2/3 complex subunit 4;Arp2/3 complex 20 kDa subunit;HOTTL;Tubulin monoglycylase TTLL3;Tubulin--tyrosine ligase-like protein 3	ARPC4;ARC20;PRO0207;TTLL3	actin-related protein 2/3 complex subunit 4 isoform c;21 kDa protein;Actin-related protein 2/3 complex subunit 4;Uncharacterized protein;Protein;13 kDa protein;actin-related protein 2/3 complex subunit 4 isoform b	C9JWM7;P59998;Q9Y4R7-6;Q9Y4R7;E7ETI0;C9JJ59	8	3	3	14.4	21.588	187	1.3992e-07	0.53532	12080000	8392800	3687300
Mitsugumin-23;Transmembrane protein 109;cDNA, FLJ94551;cDNA FLJ57860, highly similar to Transmembrane protein 109	TMEM109	Transmembrane protein 109;cDNA FLJ57860, highly similar to Transmembrane protein 109	Q9BVC6;B2R9T9;B4E1S3;E7ETZ3	2	2	2	8.6	26.21	243	3.44e-32	0.53735	27622000	19085000	8536800
Pre-mRNA cleavage complex 2 protein Pcf11;Pre-mRNA cleavage complex II protein Pcf11;cDNA FLJ61740, highly similar to Pre-mRNA cleavage complex 2 protein Pcf11	KIAA0824;PCF11	>IPI:IPI00016387.4|SWISS-PROT:O94913|ENSEMBL:ENSP00000298281|REFSEQ:NP_056969|H-INV:HIT000435570|VEGA:OTTHUMP00000234826 Tax_Id=9606 Gene_Symbol=PCF11 Pre-mRNA cleavage complex 2 protein Pcf11;>IPI:IPI00922462.2|TREMBL:B7Z7X4;E9PQ01|ENSEMBL:ENSP00000434540	O94913;B7Z7X4;E9PQ01;E9PKN0	3	1	1	0.6	173.05	1555	0.05775	0.53814	6628100	5074000	1554100
DTDP-4-keto-6-deoxy-D-glucose 4-reductase;Methionine adenosyltransferase 2 subunit beta;Methionine adenosyltransferase II beta;cDNA FLJ76904, highly similar to Homo sapiens methionine adenosyltransferase II, beta (MAT2B), transcript variant 2, mRNA;cDNA FLJ55836, highly similar to Homo sapiens methionine adenosyltransferase II, beta (MAT2B), transcript variant 2, mRNA	MAT2B;MSTP045;Nbla02999;TGR;UNQ2435/PRO4995	Isoform 1 of Methionine adenosyltransferase 2 subunit beta;Isoform 2 of Methionine adenosyltransferase 2 subunit beta;Isoform 4 of Methionine adenosyltransferase 2 subunit beta;Isoform 3 of Methionine adenosyltransferase 2 subunit beta;cDNA FLJ55836, highl	Q9NZL9-1;Q9NZL9;A8K7A4;Q9NZL9-2;Q9NZL9-4;Q9NZL9-3;B7Z1X8;E5RFC9	9	4	4	13.2	37.551	334	9.3573e-35	0.54294	8766400	5307600	3458800
Acyl-CoA thioester hydrolase 9;Acyl-coenzyme A thioesterase 9, mitochondrial;ACOT9 protein;CGI16-iso	ACOT9;CGI-16	Isoform 4 of Acyl-coenzyme A thioesterase 9, mitochondrial;Isoform 1 of Acyl-coenzyme A thioesterase 9, mitochondrial;Isoform 2 of Acyl-coenzyme A thioesterase 9, mitochondrial;Isoform 3 of Acyl-coenzyme A thioesterase 9, mitochondrial;30 kDa protein	Q9Y305-4;Q9Y305;Q9Y305-1;Q96EA2;Q9Y305-2;Q9Y305-3;Q9H2R8	6	3	3	6	50.85	448	0.0053687	0.54361	2709700	1326300	1383400
Activator of 90 kDa heat shock protein ATPase homolog 1;p38;cDNA FLJ56675, highly similar to Activator of 90 kDa heat shock protein ATPase homolog 1	AHSA1;C14orf3;HSPC322	Activator of 90 kDa heat shock protein ATPase homolog 1;cDNA FLJ56675, highly similar to Activator of 90 kDa heat shock protein ATPase homolog 1	O95433;B4DUR9	2	2	2	6.2	38.274	338	0.0054257	0.54565	66232000	2583500	63648000
Sideroflexin-3;Putative uncharacterized protein SFXN3;Sideroflexin 3;cDNA FLJ58980, highly similar to Sideroflexin-3	SFXN3;hCG_24661	cDNA FLJ58980, highly similar to Sideroflexin-3	Q9BWM7;A6NCZ6;B4DRS6	1	4	4	14	36.35	329	5.4544e-32	0.54778	10029000	6089700	3939400
Coactosin-like protein	CLP;COTL1	Coactosin-like protein	Q14019	1	2	2	12	15.945	142	0.025545	0.5503	3672200	2559200	1113000
14-3-3 protein gamma;14-3-3 protein gamma, N-terminally processed;Protein kinase C inhibitor protein 1;cDNA FLJ14168 fis, clone NT2RP2001440, highly similar to 14-3-3 protein gamma;cDNA FLJ51843, highly similar to 14-3-3 protein gamma;cDNA FLJ52141, highly similar to 14-3-3 protein gamma	YWHAG	14-3-3 protein gamma;cDNA FLJ51843, highly similar to 14-3-3 protein gamma;cDNA FLJ52141, highly similar to 14-3-3 protein gamma	P61981;B3KNB4;B4DHC4;B4DE78	3	12	6	41.7	28.302	247	4.7045e-97	0.5556	44357000	27144000	17214000
Chloride channel ABP;Chloride intracellular channel protein 1;Nuclear chloride ion channel 27;Regulatory nuclear chloride ion channel protein;Chloride intracellular channel 1 variant;cDNA, FLJ94671, Homo sapiens chloride intracellular channel 1 (CLIC1), mRNA;Chloride intracellular channel 1	CLIC1;NCC27;DADB-110M10.1-001;DAMA-236L13.3-001;DAMC-117B11.2-001;DAQB-350E15.4-001;DASS-312M4.8-001;XXbac-BCX88C14.3-001	Chloride intracellular channel protein 1	O00299;Q53FB0;Q5SRT3	1	5	5	20.7	26.922	241	1.6219e-06	0.55734	7291400	3745900	3545600
Calcyclin-binding protein;S100A6-binding protein;Siah-interacting protein;Calcyclin binding protein;Calcyclin binding protein, isoform CRA_a;cDNA, FLJ93790, Homo sapiens Siah-interacting protein (SIP), mRNA;Growth-inhibiting gene 5 protein;cDNA FLJ36106 fis, clone TESTI2021531, highly similar to Calcyclin-binding protein;cDNA FLJ57914, moderately similar to Calcyclin-binding protein	CACYBP;PNAS-107;S100A6BP;SIP;hCG_2024873;RP1-102G20.6-001;RP1-102G20.6-002;RP1-102G20.6-003	Isoform 1 of Calcyclin-binding protein;cDNA FLJ36106 fis, clone TESTI2021531, highly similar to Calcyclin-binding protein;calcyclin-binding protein isoform 2;cDNA FLJ57914, moderately similar to Calcyclin-binding protein;Isoform 2 of Calcyclin-binding prot	Q9HB71-1;Q9HB71;Q5R371;Q6NVY0;B3KSF1;E7ETW4;Q5R370;B2ZWH1;B4DFD3;Q9HB71-2	5	4	4	13.6	26.21	228	1.3384e-08	0.55757	16685000	10994000	5691000
Endoplasmic reticulum-Golgi intermediate compartment protein 3;Serologically defined breast cancer antigen NY-BR-84;cDNA FLJ56701, highly similar to Endoplasmic reticulum-Golgi intermediate compartment protein 3;ERGIC and golgi 3;Endoplasmic reticulum-localized protein ERp43;ERGIC and golgi 3, isoform CRA_a;Putative uncharacterized protein	C20orf47;CGI-54;ERGIC3;ERV46;PRO0989;SDBCAG84;RP3-477O4.12-006;hCG_38214;RP3-477O4.12-017;RP3-477O4.12-008;RP3-477O4.12-015	Uncharacterized protein;Isoform 3 of Endoplasmic reticulum-Golgi intermediate compartment protein 3;44 kDa protein;Isoform 1 of Endoplasmic reticulum-Golgi intermediate compartment protein 3;ERGIC and golgi 3;Uncharacterized protein;Putative uncharacterize	Q9Y282-2;Q9Y282;B4DV36;E9PFA8;Q5JWS0;Q9Y282-3;Q9Y282-1;A2TJK5;E9PBF4;A6PVJ3;E7ERX7;O95330;Q5JWS2;Q5JWS1	9	2	2	4.3	44.828	398	3.2359e-05	0.55955	5968600	3522000	2446600
Elongation factor 1-beta;HCG19809;Similar to eukaryotic translation elongation factor 1 beta 2; eukaryotic translation elongation factor 1 beta 1;Putative uncharacterized protein EEF1B2	EEF1B;EEF1B2;EF1B;hCG_19809;LOC392793;tcag7.1190	Elongation factor 1-beta;Uncharacterized protein;Glutathione S-transferase, C-terminal-like domain containing protein	P24534;A4D1M6;C9JZW3	3	2	2	6.2	24.763	225	0.046091	0.55985	15454000	10075000	5379400
Glyoxylate reductase/hydroxypyruvate reductase;GRHPR protein;cDNA, FLJ96788, Homo sapiens glyoxylate reductase/hydroxypyruvate reductase(GRHPR), mRNA;Glyoxylate reductase/hydroxypyruvate reductase, isoform CRA_b	GRHPR;RP11-397D12.2-004;GLXR;MSTP035;hCG_30089;RP11-397D12.2-002	Glyoxylate reductase/hydroxypyruvate reductase;GRHPR protein (Fragment);Glyoxylate reductase/hydroxypyruvate reductase	Q5T946;Q5M7Z5;Q9UBQ7;Q5T945	3	3	3	6.6	43.593	395	3.3149e-05	0.56152	10975000	6900800	4074400
Cervical cancer proto-oncogene 3 protein;FUN14 domain-containing protein 2;Hepatitis C virus core-binding protein 6;FUN14 domain containing 2	DC44;FUNDC2;HCBP6;HCC3;PD03104;GS1-273L24.1-004	FUN14 domain-containing protein 2;FUN14 domain containing 2 (Fragment)	Q9BWH2;Q5HYP8	5	4	4	21.7	20.675	189	1.7801e-21	0.56375	11929000	7550000	4378500
APOBEC1-binding protein 2;DnaJ homolog subfamily B member 11;DnaJ protein homolog 9;ER-associated DNAJ;ER-associated dnaJ protein 3;ER-associated Hsp40 co-chaperone;HEDJ;Human DnaJ protein 9;PWP1-interacting protein 4;cDNA FLJ42295 fis, clone TLIVE2008213, highly similar to DnaJ homolog subfamily B member 11;cDNA FLJ56253, highly similar to DnaJ homolog subfamily B member 11	DNAJB11;EDJ;ERJ3;HDJ9;PSEC0121;UNQ537/PRO1080	DnaJ homolog subfamily B member 11;Protein	Q9UBS4;B3KW63	2	3	3	7.5	40.513	358	8.6386e-11	0.56662	6715100	3834200	2880900
D-fructose-6-phosphate amidotransferase 1;Glucosamine--fructose-6-phosphate aminotransferase [isomerizing] 1;Glutamine:fructose 6 phosphate amidotransferase 1;Hexosephosphate aminotransferase 1;D-fructose-6-phosphate amidotransferase 2;Glucosamine--fructose-6-phosphate aminotransferase [isomerizing] 2;Glutamine:fructose 6 phosphate amidotransferase 2;Hexosephosphate aminotransferase 2;cDNA, FLJ95…	GFAT;GFPT;GFPT1;GFPT2	Isoform 1 of Glucosamine--fructose-6-phosphate aminotransferase [isomerizing] 1;Isoform 2 of Glucosamine--fructose-6-phosphate aminotransferase [isomerizing] 1;Glucosamine--fructose-6-phosphate aminotransferase [isomerizing] 2	Q06210-1;Q06210;Q06210-2;O94808;B2RB90;B3KM63;B3KMR8;B4DN38	3	2	2	2.3	78.806	699	0.011142	0.56964	2068000	1102800	965170
Endoplasmic oxidoreductin-1-like protein;ERO1-like protein alpha;Oxidoreductin-1-L-alpha	ERO1L;UNQ434/PRO865	ERO1-like protein alpha	Q96HE7	3	4	4	9.6	54.392	468	2.1822e-19	0.5701	12154000	8820400	3333600
Interferon-induced transmembrane protein 3;Interferon-inducible protein 1-8U;cDNA FLJ76420, highly similar to Homo sapiens interferon induced transmembrane protein 3 (1-8U) (IFITM3), mRNA;HCG2036716;Interferon induced transmembrane protein 3 (1-8U);Interferon-induced transmembrane protein 2;Interferon-inducible protein 1-8D;IFITM2 protein;Interferon induced transmembrane protein 2 (1-8D);Interfer…	IFITM3;hCG_2036716;IFITM2;CD225;IFI17;IFITM1;hCG_1741134	Interferon-induced transmembrane protein 3;Interferon-induced transmembrane protein 2;Interferon induced transmembrane protein 2;Interferon-induced transmembrane protein 1;Uncharacterized protein;Uncharacterized protein;Protein	Q01628;Q53Y76;Q01629;Q6IBB0;P13164;Q53XZ0;E9PQN9;E9PS44	7	1	1	12	14.632	133	1.8332e-21	0.57235	8370800	4569700	3801100
Proteasome subunit alpha type-7;Proteasome subunit RC6-1;Proteasome subunit XAPC7;Proteasome subunit alpha type;Proteasome (Prosome, macropain) subunit, alpha type, 7	HSPC;PSMA7;RP5-1005F21.4-006	Isoform 1 of Proteasome subunit alpha type-7;Isoform 2 of Proteasome subunit alpha type-7;Uncharacterized protein	O14818-1;O14818;Q05DH1;O14818-2;E9PBC8;Q5JXJ1	9	4	4	14.9	27.887	248	1.7287e-09	0.57261	34746000	20251000	14494000
Similar to AFG3 ATPase family gene 3-like 2 (Yeast);AFG3-like protein 2;Paraplegin-like protein;AFG3 ATPase family gene 3-like 2 (Yeast), isoform CRA_a	AFG3L2;hCG_38275	Similar to AFG3 ATPase family gene 3-like 2 (Fragment);AFG3-like protein 2	Q8TA92;Q9Y4W6;D3DUJ0	2	3	3	3.6	90.193	812	0.00056721	0.57289	3169900	2173800	996110
2,4-dienoyl-CoA reductase [NADPH];2,4-dienoyl-CoA reductase, mitochondrial;2,4-dienoyl-CoA reductase;cDNA FLJ50204, highly similar to 2,4-dienoyl-CoA reductase, mitochondrial (EC 1.3.1.34)	DECR;DECR1	2,4-dienoyl-CoA reductase, mitochondrial;cDNA FLJ50204, highly similar to 2,4-dienoyl-CoA reductase, mitochondrial;Uncharacterized protein;Uncharacterized protein;Uncharacterized protein;Uncharacterized protein	Q16698;Q7LDK6;B7Z6B8;E5RFV2;E5RJG7;E5RJD2;E5RID6	6	2	2	7.8	36.067	335	7.9836e-25	0.57309	3927600	2625400	1302200
Adenylate kinase 2, mitochondrial;ATP-AMP transphosphorylase 2;cDNA FLJ55097, highly similar to Adenylate kinase isoenzyme 2, mitochondrial (EC 2.7.4.3)	ADK2;AK2	Isoform 1 of Adenylate kinase 2, mitochondrial;Isoform 2 of Adenylate kinase 2, mitochondrial;Isoform 5 of Adenylate kinase 2, mitochondrial;Uncharacterized protein;Isoform 3 of Adenylate kinase 2, mitochondrial;Isoform 6 of Adenylate kinase 2, mitochondri	P54819-1;P54819;P54819-2;P54819-5;P54819-4;B4DLK2;E7EWH4;P54819-3;P54819-6	6	6	6	26.8	26.477	239	1.5912e-25	0.57557	69031000	42482000	26550000
Baboon M7 virus receptor;Neutral amino acid transporter B(0);RD114/simian type D retrovirus receptor;Sodium-dependent neutral amino acid transporter type 2;Solute carrier family 1 member 5;cDNA FLJ58403, highly similar to Neutral amino acid transporter B(0);cDNA, FLJ79445, highly similar to Neutral amino acid transporter B(0);Solute carrier family 1 (Neutral amino acid transporter), member 5 vari…	ASCT2;M7V1;RDR;RDRC;SLC1A5	Neutral amino acid transporter B(0);Neutral amino acid transporter;neutral amino acid transporter B(0) isoform 3;neutral amino acid transporter B(0) isoform 2	Q15758;B4DR77;B7ZB81;Q59ES3;Q71UA6;B4DE27;E9PC01;B4DWS4	4	6	6	11.5	56.598	541	4.5083e-22	0.57577	65048000	36013000	29036000
Matrix-remodeling-associated protein 1;Plasma membrane calcium ATPase isoform 4;Plasma membrane calcium pump isoform 4;Plasma membrane calcium-transporting ATPase 4;PMCA4b;Putative uncharacterized protein DKFZp686M088;ATP2B4 protein;cDNA FLJ78761, highly similar to Homo sapiens ATPase, Ca++ transporting, plasma membrane 4 (ATP2B4), transcript variant 1, mRNA;ATPase, Ca++ transporting, plasma memb…	ATP2B2;ATP2B4;MXRA1;DKFZp686M088;hCG_18445;RP11-397P13.1-002;PMCA2;ATP2B2 variant protein;ATP2B3	Isoform XD of Plasma membrane calcium-transporting ATPase 4;Isoform ZD of Plasma membrane calcium-transporting ATPase 4;Isoform XB of Plasma membrane calcium-transporting ATPase 4;Isoform ZB of Plasma membrane calcium-transporting ATPase 4;Isoform XA of Pl	P23634-1;P23634;P23634-8;P23634-6;A1X4Q1;Q68DH9;P23634-7;P23634-2;A7E2D8;A8K8U3;B1APW5;P23634-3;P23634-4;A1X4Q2;P23634-5;Q01814-1;Q01814;Q01814-5;Q4LE63;Q16720-1;Q16720;Q01814-8;A1X4P8;Q4J697;Q16720-4;Q01814-3;E7EME2;Q4J696;Q4J699;Q01814-2;Q01814-6;Q16720-2;A1L3B5;Q16720-5;Q01814-7;Q16720-3;Q01814-4;A2VBC8;Q4J698;Q16720-6;Q16720-7;Q16720-8	24	2	1	1.8	137.92	1241	2.4479e-11	0.57731	3354100	1207700	2146400
p90;T9;Transferrin receptor protein 1;Transferrin receptor protein 1, serum form;cDNA FLJ75881, highly similar to Homo sapiens transferrin receptor (p90, CD71) (TFRC), mRNA;cDNA FLJ57106, highly similar to Transferrin receptor protein 1	TFRC	Transferrin receptor protein 1;cDNA FLJ57106, highly similar to Transferrin receptor protein 1	P02786;A8K6Q8;B7Z2I6	7	24	24	33.4	84.87	760	1.826e-276	0.57846	1094500000	545140000	549340000
Geranylgeranyl transferase type II subunit alpha;Geranylgeranyl transferase type-2 subunit alpha;Rab geranylgeranyltransferase subunit alpha;Rab geranyl-geranyltransferase subunit alpha;Rab geranylgeranyltransferase, alpha subunit, isoform CRA_a;RABGGTA protein	RABGGTA;hCG_40182	Geranylgeranyl transferase type-2 subunit alpha	Q92696;D3DS70;Q6FHF7	3	7	7	11.5	65.071	567	1.2981e-20	0.57934	55595000	7784000	47811000
Dimethylallyltranstransferase;Farnesyl diphosphate synthase;Farnesyl pyrophosphate synthase;Geranyltranstransferase;Farnesyl pyrophosphate synthetase like-4 protein;cDNA FLJ12779 fis, clone NT2RP2001748, moderately similar to FARNESYL PYROPHOSPHATE SYNTHETASE	FDPS;FPS;KIAA1293	Farnesyl pyrophosphate synthase;farnesyl pyrophosphate synthase isoform b;Farnesyl pyrophosphate synthetase like-4 protein (Fragment);cDNA FLJ12779 fis, clone NT2RP2001748, moderately similar to FARNESYL PYROPHOSPHATE SYNTHETASE;Polyprenyl synthetase famil	P14324;E9PCI9;Q14329;B3KMW3	5	6	6	12.6	48.275	419	1.5154e-22	0.58045	81412000	66345000	15067000
Endobrevin;Vesicle-associated membrane protein 8;Putative uncharacterized protein VAMP8	VAMP8	Vesicle-associated membrane protein 8;Uncharacterized protein	Q9BV40;B8ZZT4	2	2	2	19	11.438	100	3.3052e-16	0.58275	4210500	2927100	1283400
Signal sequence receptor subunit delta;Translocon-associated protein subunit delta;Putative uncharacterized protein SSR4	SSR4;TRAPD	translocon-associated protein subunit delta isoform 1 precursor;translocon-associated protein subunit delta isoform 3 precursor;Translocon-associated protein subunit delta;Uncharacterized protein;Protein	P51571;A6NLM8	5	3	3	18.5	20.213	184	5.2158e-60	0.58291	33825000	21849000	11976000
Endoplasmic reticulum resident protein 28;Endoplasmic reticulum resident protein 29;Endoplasmic reticulum resident protein 31	C12orf8;ERP28;ERP29	Endoplasmic reticulum resident protein 29	P30040	8	12	12	42.9	28.993	261	3.5887e-60	0.58385	365310000	237940000	127380000
Cadherin family member 2;Desmocollin-2;Desmocollin-3;Desmosomal glycoprotein II;Desmosomal glycoprotein III;Desmocollin 2;cDNA FLJ76245, highly similar to Homo sapiens desmocollin 2 (DSC2), transcript variant Dsc2a, mRNA;cDNA FLJ55716, highly similar to Desmocollin-2;Putative uncharacterized protein DKFZp686P18250	CDHF2;DSC2;DSC3;DKFZp686P18250	Isoform 2B of Desmocollin-2;Uncharacterized protein;Isoform 2A of Desmocollin-2	Q02487-2;Q02487;A9X9L1;A8K2P8;A9X9K9;A9X9L0;B4DLJ5;E9PHQ8;Q02487-1;Q63HM4	6	3	3	3.2	93.768	847	1.1411e-06	0.5841	12478000	9217700	3260500
Calcium-binding mitochondrial carrier protein SCaMC-1;Mitochondrial ATP-Mg/Pi carrier protein 1;Mitochondrial Ca(2+)-dependent solute carrier protein 1;Small calcium-binding mitochondrial carrier protein 1;Solute carrier family 25 member 24;cDNA FLJ50039, highly similar to Homo sapiens solute carrier family 25, member 24, transcript variant 1, mRNA;cDNA, FLJ79405, highly similar to Homo sapiens s…	APC1;MCSC1;SCAMC1;SLC25A24	Isoform 1 of Calcium-binding mitochondrial carrier protein SCaMC-1;Isoform 2 of Calcium-binding mitochondrial carrier protein SCaMC-1	Q6NUK1-1;Q6NUK1;B4E290;B7ZB41;Q6NUK1-2	2	12	12	25.2	53.354	477	1.5983e-39	0.58426	75343000	41602000	33741000
Cell immortalization-related protein 2;Neudesin;Neuron-derived neurotrophic factor;Secreted protein of unknown function	CIR2;NENF;SPUF	Neudesin	Q9UMX5	1	4	4	23.3	18.856	172	8.2845e-36	0.58517	34790000	16754000	18036000
Surfeit locus protein 4;cDNA FLJ53587, highly similar to Surfeit locus protein 4;cDNA FLJ50444, highly similar to Surfeit locus protein 4;cDNA FLJ61766, highly similar to Surfeit locus protein 4;cDNA, FLJ79379, highly similar to Surfeit locus protein 4;Surfeit 4, isoform CRA_b;cDNA FLJ50722, highly similar to Surfeit locus protein 4;Surfeit 4	SURF4;SURF-4;hCG_28148;RP11-244N20.4-002;RP11-244N20.4-004	Isoform 1 of Surfeit locus protein 4;cDNA FLJ50722, highly similar to Surfeit locus protein 4;Surfeit 4;Surfeit 4	O15260-1;O15260;B7Z8F3;B7Z1G8;B7Z7A8;Q5T8U7;O15260-2;Q5T8U5	4	1	1	3.7	30.394	269	0.003097	0.58677	15532000	8344100	7188100
Protein phosphatase methylesterase 1	PME1;PP2593;PPME1;PRO0750	44 kDa protein;Isoform 1 of Protein phosphatase methylesterase 1;Isoform 2 of Protein phosphatase methylesterase 1	Q9Y570-1;Q9Y570;F2Z377;Q9Y570-2	5	3	3	6	43.87	400	9.2818e-05	0.58932	6035600	3237700	2797900
GDP-mannose pyrophosphorylase A;GTP-mannose-1-phosphate guanylyltransferase alpha;Mannose-1-phosphate guanyltransferase alpha	GMPPA	Isoform 2 of Mannose-1-phosphate guanyltransferase alpha;Isoform 1 of Mannose-1-phosphate guanyltransferase alpha;32 kDa protein	Q96IJ6-2;Q96IJ6;Q96IJ6-1	6	4	4	8.5	52.017	473	8.3297e-07	0.59102	3068400	1637800	1430600
cDNA FLJ54528, highly similar to Serine/threonine-protein kinase MST4 (EC 2.7.11.1);cDNA, FLJ79036, highly similar to Serine/threonine-protein kinase MST4 (EC 2.7.11.1);Mammalian STE20-like protein kinase 4;Mst3 and SOK1-related kinase;Serine/threonine-protein kinase MASK;Serine/threonine-protein kinase MST4;STE20-like kinase MST4;Serine/threonine protein kinase MST4;Putative uncharacterized prot…	MASK;MST4;STK3;MST3;STK24;RP11-111L24.5-003;hCG_27759;RP11-111L24.5-001;RP11-111L24.5-006;RP11-111L24.5-005	cDNA, FLJ79036, highly similar to Serine/threonine-protein kinase MST4;Serine/threonine-protein kinase MST4;cDNA FLJ90669 fis, clone PLACE1005519, moderately similar to Homo sapiens STE20-like kinase 3 (mst-3) mRNA;serine/threonine-protein kinase MST4 isof	B4E0Y9;E7ERH7;Q9P289;Q499L9;C9JGW8;Q8NBY1;Q8NC04;Q96SR7;Q9NWX4;B4DT57;Q9Y6E0-1;Q9Y6E0;Q6FG81;Q6P0Y1;E9PCB9;Q5JV93;Q9Y6E0-2;Q5U0E6;B4DR80;Q5JV99;B4DMR0;E9PCB4;Q5JV98	20	3	3	6.6	49.183	438	0.001167	0.59168	5259800	1309900	3949900
Cytoplasmic antiproteinase;Peptidase inhibitor 6;Placental thrombin inhibitor;Serpin B6;MSTP057;Serpin peptidase inhibitor, clade B (Ovalbumin), member 6;Cytoplasmic antiproteinase 2;Peptidase inhibitor 8;Serpin B8;cDNA, FLJ94391, highly similar to Homo sapiens serine (or cysteine) proteinase inhibitor, clade B (ovalbumin), member 8 (SERPINB8), mRNA;Serpin peptidase inhibitor, clade B (Ovalbumin)…	PI6;PTI;SERPINB6;RP1-90J20.6-007;PI8;SERPINB8	Serpin B6;Uncharacterized protein;Serpin B8;serpin B8 isoform b;Protein;Uncharacterized protein;Uncharacterized protein	P35237;Q8IXH2;E9PD07;Q5TD02;P50452;B2R9H3;Q8N178;C9JVA8;C9JTJ8	7	2	2	4.9	46.37	409	0.00019437	0.59216	7784000	6006800	1777200
DnaJ homolog subfamily C member 19;Mitochondrial import inner membrane translocase subunit TIM14;DnaJ (Hsp40) homolog, subfamily C, member 19, isoform CRA_a;Putative uncharacterized protein DNAJC19	DNAJC19;TIM14;TIMM14;hCG_17532	Mitochondrial import inner membrane translocase subunit TIM14;mitochondrial import inner membrane translocase subunit TIM14 isoform 2	Q96DA6;C9JBV1	2	2	2	19	12.498	116	6.2352e-06	0.59312	5645000	1486600	4158400
Inorganic pyrophosphatase 2, mitochondrial;Pyrophosphatase SID6-306;Pyrophosphate phospho-hydrolase 2;cDNA FLJ60819, highly similar to Inorganic pyrophosphatase 2, mitochondrial (EC 3.6.1.1);cDNA FLJ76209, highly similar to Homo sapiens inorganic pyrophosphatase 2 (PPA2), transcript variant 2, mRNA;cDNA FLJ59863, highly similar to Inorganic pyrophosphatase 2, mitochondrial (EC 3.6.1.1)	HSPC124;PPA2	Isoform 2 of Inorganic pyrophosphatase 2, mitochondrial;Isoform 1 of Inorganic pyrophosphatase 2, mitochondrial;Uncharacterized protein;Isoform 3 of Inorganic pyrophosphatase 2, mitochondrial;inorganic pyrophosphatase 2, mitochondrial isoform 3 precursor;c	Q9H2U2-2;Q9H2U2;Q9H2U2-1;B4DR66;E2QRM6;Q9H2U2-3;A8K0P2;B4DFH3;D6RGI1	12	3	3	9.7	39.638	349	6.4706e-19	0.59427	11484000	9499300	1984200
Cellular thyroid hormone-binding protein;p55;Prolyl 4-hydroxylase subunit beta;Protein disulfide-isomerase;cDNA FLJ56766, highly similar to Protein disulfide-isomerase (EC5.3.4.1);cDNA FLJ59430, highly similar to Protein disulfide-isomerase (EC 5.3.4.1);cDNA FLJ38619 fis, clone HEART2007696, highly similar to Protein disulfide-isomerase (EC 5.3.4.1);cDNA FLJ45462 fis, clone BRSTN2011961, highly s…	ERBA2L;P4HB;PDI;PDIA1;PO4DB;hCG_95895	Protein disulfide-isomerase;cDNA FLJ59430, highly similar to Protein disulfide-isomerase;cDNA FLJ59033, highly similar to Protein disulfide-isomerase;cDNA FLJ59361, highly similar to Protein disulfide-isomerase	P07237;B4DJS0;B4DUA5;E7EVA1;B3KTQ9;B4DLN6;Q96C96;B4DNL5	6	19	19	31.1	57.116	508	2.1844e-176	0.59542	397350000	260390000	136950000
Hydroxysteroid dehydrogenase-like protein 2;cDNA, FLJ94174;cDNA FLJ52979, highly similar to Homo sapiens hydroxysteroid dehydrogenase like 2 (HSDL2), mRNA;cDNA FLJ61200, highly similar to Homo sapiens hydroxysteroid dehydrogenase like 2 (HSDL2), mRNA	C9orf99;HSDL2	Isoform 1 of Hydroxysteroid dehydrogenase-like protein 2;Isoform 2 of Hydroxysteroid dehydrogenase-like protein 2;cDNA FLJ61200, highly similar to Homo sapiens hydroxysteroid dehydrogenase like 2 (HSDL2), mRNA	Q6YN16-1;Q6YN16;Q6YN16-2;B2R923;B4DWC7;B4E136	3	3	3	6.7	45.394	418	1.4191e-15	0.59608	8881800	4749500	4132300
Polypeptide GalNAc transferase 1;Polypeptide N-acetylgalactosaminyltransferase 1;Polypeptide N-acetylgalactosaminyltransferase 1 soluble form;Protein-UDP acetylgalactosaminyltransferase 1;UDP-GalNAc:polypeptide N-acetylgalactosaminyltransferase 1;cDNA FLJ77222, highly similar to Homo sapiens UDP-N-acetyl-alpha-D-galactosamine:polypeptide N-acetylgalactosaminyltransferase 1 (GalNAc-T1) (GALNT1), m…	GALNT1	Isoform 1 of Polypeptide N-acetylgalactosaminyltransferase 1;Polypeptide N-acetylgalactosaminyltransferase 1	Q10472-1;Q10472;A8KAJ7;Q05BM8;Q68VJ7	5	3	3	5.7	64.218	559	2.795e-08	0.59787	4170800	2489900	1680900
Tumor protein D52-like 2;Tumor protein D52-like 2, isoform CRA_e;Tumor protein D52-like 2, isoform CRA_d;Tumor protein D54;cDNA FLJ52530, highly similar to Tumor protein D54;Tumor protein D52-like 2 isoform e variant;cDNA, FLJ95317, highly similar to Homo sapiens tumor protein D52-like 2 (TPD52L2), mRNA;TPD52L2 protein;Tumor protein D52-like 2, isoform CRA_a;cDNA FLJ54053, highly similar to Homo …	hCG_22755;RP4-591C20.2-003;TPD52L2;RP4-591C20.2-007;DKFZp686A1765;RP4-591C20.2-005	tumor protein D54 isoform a;tumor protein D54 isoform c;Isoform 1 of Tumor protein D54;Isoform 3 of Tumor protein D54;Isoform 4 of Tumor protein D54;Isoform 2 of Tumor protein D54;cDNA FLJ53635, highly similar to Homo sapiens tumor protein D52-like 2 (TPD5	Q5JWU6;Q5U0E0;O43399-1;O43399;B4DDV4;Q53GA0;Q6FGS1;O43399-3;O43399-4;O43399-2;Q68E05;B4DPJ6;Q5J908	7	4	4	18.8	24.853	229	1.2e-08	0.59909	2354400	1558900	795500
Plastin-3;T-plastin;cDNA FLJ78707, highly similar to Homo sapiens plastin 3 (T isoform) (PLS3), mRNA;cDNA, FLJ92722, Homo sapiens plastin 3 (T isoform) (PLS3), mRNA;Plastin 3 (T isoform);Plastin 3 variant;cDNA FLJ59681, highly similar to Plastin-3;cDNA FLJ61108, highly similar to Plastin-3;cDNA FLJ51929, highly similar to Plastin-3;cDNA FLJ50683, highly similar to Plastin-3;Similar to plastin 3 (…	PLS3;hCG_18485	Plastin-3;cDNA FLJ59681, highly similar to Plastin-3;plastin-3 isoform 2	P13797;A8K579;Q53GY0;B4DGB4;E7ERL5;B4DG31;B4DPW9;B7Z6M1;Q96HI1	10	14	14	22.4	70.81	630	3.3504e-61	0.60164	40274000	21592000	18682000
Acyl-CoA dehydrogenase family member 9, mitochondrial;Acyl-Coenzyme A dehydrogenase family, member 9 variant;ACAD9 protein;Acyl-Coenzyme A dehydrogenase family, member 9, isoform CRA_b;cDNA FLJ12506 fis, clone NT2RM2001700, weakly similar to ACYL-COA DEHYDROGENASE, VERY-LONG-CHAIN SPECIFIC (EC 1.3.99.-);cDNA FLJ53144, highly similar to Acyl-CoA dehydrogenase family member 9, mitochondrial (EC 1.3…	ACAD9;hCG_2022772	Acyl-CoA dehydrogenase family member 9, mitochondrial;cDNA FLJ53144, highly similar to Acyl-CoA dehydrogenase family member 9, mitochondrial	Q9H845;Q59FN3;Q9BUX5;Q9H9W4	3	10	10	15.3	68.76	621	2.0323e-45	0.60197	173810000	154130000	19687000
Phosphohydroxythreonine aminotransferase;Phosphoserine aminotransferase;cDNA FLJ55059, highly similar to Phosphoserine aminotransferase (EC 2.6.1.52)	PSA;PSAT1	Phosphoserine aminotransferase;Isoform 2 of Phosphoserine aminotransferase;21 kDa protein	Q9Y617-1;Q9Y617;B4DHQ3;B4DHX7;Q9Y617-2;A9LS35	3	6	6	14.5	45.355	415	1.1873e-32	0.60248	23095000	15257000	7838600
Cytoplasmic dynein 1 heavy chain 1;Cytoplasmic dynein heavy chain 1;Dynein heavy chain, cytosolic;cDNA FLJ52684, highly similar to Dynein heavy chain, cytosolic;Dynein heavy chain;Cytoplasmic dynein heavy chain	DHC1;DNCH1;DNCL;DNECL;DYHC;DYNC1H1;KIAA0325;Dnchc1	Cytoplasmic dynein 1 heavy chain 1	Q14204;B4DSR6;Q92862;Q9NRC3	1	4	4	0.8	532.4	4646	0.00021551	0.60484	1080600	468630	611920
cDNA FLJ52813, highly similar to Homo sapiens ELOVL family member 5, elongation of long chain fatty acids, mRNA;Elongation of very long chain fatty acids protein 5;Fatty acid elongase 1;cDNA FLJ43108 fis, clone CTONG2021289, highly similar to Homo sapiens ELOVL family member 5, elongation of long chain fatty acids, mRNA;cDNA FLJ52737, highly similar to Homo sapiens ELOVL family member 5, elongati…	ELOVL2;ELOVL5;PRO0530;KLHL33;hCG_2001424;RP3-483K16.1;RP3-483K16.1-002;B144;LST1	cDNA FLJ52813, highly similar to Homo sapiens ELOVL family member 5, elongation of long chain fatty acids, mRNA;Elongation of very long chain fatty acids protein 5;34 kDa protein;>IPI:IPI00887935.2|SWISS-PROT:A6NCF5|TREMBL:B2RUZ8;B9EKU7|ENSEMBL:ENSP0000034	B4DZJ2;E2QRH7;Q9NYP7;B3KWH9;B4DSC2;A6NCF5;B2RUZ8;B9EKU7;Q5TGH5;O00453-5;O00453	6	2	2	4.6	38.368	326	0.068354	0.60786	5376200	3468100	1908000
Transmembrane and coiled-coil domain-containing protein 1;Transmembrane and coiled-coil domains protein 4;Xenogeneic cross-immune protein PCIA3;cDNA FLJ50833, highly similar to Transmembrane and coiled-coil domains protein 1;cDNA, FLJ78979, highly similar to Transmembrane and coiled-coil domains protein 1;Transmembrane and coiled-coil domains 1, isoform CRA_a;Putative uncharacterized protein TMCO1	PNAS-10;PNAS-136;TMCC4;TMCO1;UNQ151/PRO177;hCG_1766418	Isoform 1 of Transmembrane and coiled-coil domain-containing protein 1;Isoform 2 of Transmembrane and coiled-coil domain-containing protein 1	Q9UM00-1;Q9UM00;Q9UM00-2;B7Z591;C9JX01	6	5	5	23.4	21.175	188	1.1341e-05	0.61053	36163000	25253000	10909000
14-3-3 protein eta;Protein AS1;cDNA, FLJ93036, highly similar to Homo sapiens tyrosine 3-monooxygenase/tryptophan 5-monooxygenaseactivation protein, eta polypeptide (YWHAH), mRNA;Homo sapiens clone CDABP0046 mRNA sequence;Tyrosine 3-monooxygenase/tryptophan 5-monooxygenase activation protein, eta polypeptide	YWHA1;YWHAH;LL22NC03-44A4.1-004	14-3-3 protein eta;Tyrosine 3-monooxygenase/tryptophan 5-monooxygenase activation protein, eta polypeptide	Q04917;B2R6N6;Q9H4N8;A2IDB2	4	10	5	37.4	28.218	246	1.1105e-63	0.61128	14801000	9017600	5783600
C-type lectin domain family 13 member E;C-type mannose receptor 2;Endocytic receptor 180;Macrophage mannose receptor 2;Urokinase-type plasminogen activator receptor-associated protein	CLEC13E;ENDO180;KIAA0709;MRC2;UPARAP	C-type mannose receptor 2	Q9UBG0	3	8	8	5.6	166.67	1479	8.6428e-23	0.61451	12206000	6425800	5779800
Ras-related protein Rab-1A;YPT1-related protein;cDNA, FLJ96558, Homo sapiens RAB1A, member RAS oncogene family (RAB1A), mRNA;RAB1A protein;RAB1A, member RAS oncogene family;RAB1A, member RAS oncogene family, isoform CRA_b;cDNA FLJ57768, highly similar to Ras-related protein Rab-1A;GTP binding protein Rab1a;Ras-related protein Rab-1B;RAB1B protein;Small GTP-binding protein	RAB1;RAB1A;hCG_22592;RAB1B;rab1b	Isoform 1 of Ras-related protein Rab-1A;Uncharacterized protein;Isoform 2 of Ras-related protein Rab-1A;Ras-related protein Rab-1B;Uncharacterized protein;Isoform 3 of Ras-related protein Rab-1A;14 kDa protein;Small GTP-binding protein	P62820-1;P62820;E7ETK2;Q5U0I6;E7END7;P62820-2;B7Z8M7;Q96RD8;Q9H0U4;Q6FIG4;E9PLD0;P62820-3;Q92927	26	3	3	15.1	22.677	205	4.7524e-08	0.61519	14814000	8914400	5899100
Copine I;HCG38213, isoform CRA_b;Copine-1;Copine I variant	CPNE1;hCG_38213;RP1-309K20.2-005;CPN1;RP1-309K20.2-032;RP1-309K20.2-007;RP1-309K20.2-009;RP1-309K20.2-008;RP1-309K20.2-016;RP1-309K20.2-012;RP1-309K20.2-010;RP1-309K20.2-011	copine-1 isoform b;Copine-1;copine-1 isoform c;Copine I;Uncharacterized protein;Copine I;Copine I;Copine I;Copine I;Copine I;Copine I;Copine I	B0QZ18;Q99829;Q59EI4;F2Z2V0;A6PVH9;E7ENH5;Q5JX44;Q5JX60;Q5JX59;Q5JX58;Q5JX56;Q5JX55;Q5JX54	18	4	4	7	59.717	542	1.192e-26	0.61613	25436000	8829300	16607000
F-box only protein 22;F-box protein FBX22p44;cDNA FLJ50132, highly similar to F-box only protein 22;F-box only protein 22 isoform a variant	FBX22;FBXO22	Isoform 1 of F-box only protein 22;Isoform 2 of F-box only protein 22;Isoform 3 of F-box only protein 22	Q8NEZ5-1;Q8NEZ5;B4DFX7;Q53EY9;Q8NEZ5-2;Q8NEZ5-3	3	3	3	7.4	44.508	403	1.0396e-09	0.61629	20917000	3108500	17809000
Cell adhesion protein SQM1;Complex I-B18;NADH dehydrogenase [ubiquinone] 1 beta subcomplex subunit 7;NADH-ubiquinone oxidoreductase B18 subunit	NDUFB7	NADH dehydrogenase [ubiquinone] 1 beta subcomplex subunit 7	P17568	2	3	3	25.5	16.402	137	5.1645e-50	0.61634	4617900	2302500	2315400
Placental ribonuclease inhibitor;Ribonuclease inhibitor;Ribonuclease/angiogenin inhibitor 1	PRI;RNH;RNH1	Ribonuclease inhibitor;30 kDa protein;Uncharacterized protein;Uncharacterized protein;Uncharacterized protein	P13489;E9PIM9;E9PLZ3;E9PMJ3	5	2	2	5	49.973	461	4.845e-06	0.61804	2810200	1537400	1272700
Integrin beta-5;Integrin beta	ITGB5;hCG_17803	Integrin beta-5	P18084;D3DNA1	9	5	5	5.9	88.053	799	1.5238e-21	0.61902	21994000	13994000	7999900
cDNA FLJ58665, highly similar to Serine/threonine-protein phosphatase 2A 55 kDa regulatory subunit B alpha isoform;Lung cancer-related protein 9;PP2A subunit B isoform alpha;PP2A subunit B isoform B55-alpha;PP2A subunit B isoform PR55-alpha;PP2A subunit B isoform R2-alpha;Serine/threonine-protein phosphatase 2A 55 kDa regulatory subunit B alpha isoform	PPP2R2A	serine/threonine-protein phosphatase 2A 55 kDa regulatory subunit B alpha isoform isoform 2;Serine/threonine-protein phosphatase 2A 55 kDa regulatory subunit B alpha isoform	B4E1T7;Q56VW8;P63151	16	5	5	10.7	52.999	457	3.5814e-74	0.62071	55958000	30157000	25801000
cDNA FLJ77177, highly similar to Homo sapiens arginine-rich, mutated in early stage tumors (ARMET), mRNA;Arginine-rich protein;Mesencephalic astrocyte-derived neurotrophic factor;Protein ARMET	ARMET;ARP;MANF	cDNA FLJ77177, highly similar to Homo sapiens arginine-rich, mutated in early stage tumors (ARMET), mRNA;Mesencephalic astrocyte-derived neurotrophic factor	A8K878;P55145	3	7	7	23.2	21.143	185	2.5483e-19	0.62084	70505000	44746000	25758000
5-nucleotidase domain-containing protein 1;cDNA FLJ76092, highly similar to Homo sapiens 5-nucleotidase, cytosolic II-like 1 (NT5C2L1), mRNA;5-nucleotidase domain containing 1, isoform CRA_b;cDNA FLJ33599 fis, clone BRAMY2013736, highly similar to 5-nucleotidase domain-containing protein 1;Novel protein	LP2642;NT5C2L1;NT5DC1;hCG_2031155;RP3-486I3.1-003	5-nucleotidase domain-containing protein 1;cDNA FLJ33599 fis, clone BRAMY2013736, highly similar to 5-nucleotidase domain-containing protein 1;Novel protein	Q5TFE4;A8K2Z3;B3KR35;Q5QPD0	3	2	2	4.6	51.844	455	0.0002957	0.62327	2926600	1554000	1372600
Vesicle-associated membrane protein-associated protein B/C;cDNA FLJ41544 fis, clone CERVX2002430, highly similar to Vesicle-associated membrane protein-associated protein B/C;cDNA FLJ13179 fis, clone NT2RP3003918, highly similar to Vesicle-associated membrane protein-associated protein B/C;VAMP (Vesicle-associated membrane protein)-associated protein B and C;VAMP (Vesicle-associated membrane prot…	UNQ484/PRO983;VAPB;hCG_26693	Isoform 1 of Vesicle-associated membrane protein-associated protein B/C;Uncharacterized protein;cDNA FLJ46565 fis, clone THYMU3040816, moderately similar to Homo sapiens VAMP (vesicle-associated membrane protein)-associated protein B and C;cDNA FLJ59139, h	O95292-1;O95292;B3KVU7;Q53XM7;A6NLV9;Q6ZSP7;Q6ZR82;B4DNS4	6	6	5	25.9	27.228	243	7.3094e-23	0.62355	21520000	14284000	7236100
ATP-binding cassette sub-family C member 1;Leukotriene C(4) transporter;Multidrug resistance-associated protein 1;Putative uncharacterized protein DKFZp781G125;Multidrug resistance protein;Putative uncharacterized protein	ABCC1;MRP;MRP1;DKFZp781G125	Isoform 9 of Multidrug resistance-associated protein 1;Isoform 1 of Multidrug resistance-associated protein 1;Isoform 2 of Multidrug resistance-associated protein 1;Isoform 4 of Multidrug resistance-associated protein 1;Isoform 6 of Multidrug resistance-as	P33527-9;P33527;Q68CP7;P33527-1;P33527-2;P33527-4;P33527-6;P33527-3;P33527-5;Q9UQ98;P33527-7;P33527-8;Q9BV39	10	14	14	8.8	172.64	1541	5.6929e-23	0.629	27432000	11561000	15871000
Outer mitochondrial membrane protein porin 3;Voltage-dependent anion-selective channel protein 3	VDAC3	Isoform 2 of Voltage-dependent anion-selective channel protein 3;31 kDa protein;Isoform 1 of Voltage-dependent anion-selective channel protein 3;Uncharacterized protein;Uncharacterized protein;Uncharacterized protein;Uncharacterized protein	Q9Y277-2;Q9Y277;Q9Y277-1;E5RHZ6;E5RJN6;E5RFP6;E5RHE1	10	6	5	19	30.789	284	1.7099e-69	0.63033	21502000	13085000	8417100
Macropain zeta chain;Multicatalytic endopeptidase complex zeta chain;Proteasome subunit alpha type-5;Proteasome zeta chain;Proteasome subunit alpha type	PSMA5	Proteasome subunit alpha type-5	P28066;Q5U0A0	1	2	2	9.5	26.411	241	5.995e-09	0.63045	15776000	10082000	5694100
Capping protein (Actin filament) muscle Z-line, beta;Capping protein (Actin filament) muscle Z-line, beta, isoform CRA_d;cDNA, FLJ93598, highly similar to Homo sapiens capping protein (actin filament) muscle Z-line, beta (CAPZB), mRNA;cDNA FLJ60094, highly similar to F-actin capping protein subunit beta;CapZ beta;F-actin-capping protein subunit beta;Capping protein (Actin filament) muscle Z-line,…	CAPZB;hCG_41078;RP4-657E11.7-008;RP4-657E11.7-001	cDNA FLJ60094, highly similar to F-actin capping protein subunit beta;Isoform 2 of F-actin-capping protein subunit beta;Isoform 1 of F-actin-capping protein subunit beta	B1AK88;B2R7T8;B4DWA6;E7EQ40;P47756-2;P47756;B1AK87;Q7L4N0;P47756-1	6	7	7	19.1	37.482	335	6.3386e-38	0.63747	50876000	27343000	23532000
26S proteasome non-ATPase regulatory subunit 13;26S proteasome regulatory subunit p40.5;26S proteasome regulatory subunit RPN9;26S proteasome regulatory subunit S11;cDNA, FLJ95595, highly similar to Homo sapiens proteasome (prosome, macropain) 26S subunit, non-ATPase, 13 (PSMD13), mRNA;Proteasome 26S non-ATPase subunit 13 isoform 1 variant;HSPC027;cDNA FLJ53046, highly similar to 26S proteasome n…	PSMD13;hCG_37689	Isoform 2 of 26S proteasome non-ATPase regulatory subunit 13;HSPC027;cDNA FLJ53046, highly similar to 26S proteasome non-ATPase regulatory subunit 13;40 kDa protein;Uncharacterized protein	Q9UNM6-2;Q9UNM6;Q9UNM6-1;B2RBM7;Q53GN6;Q9Y6E3;B4DJ66;Q9UNM7;E9PL38	5	2	2	4.5	42.942	378	0.017173	0.63788	1242700	585170	657480
cDNA FLJ77840, highly similar to Homo sapiens solute carrier family 43, member 3 (SLC43A3), mRNA;cDNA, FLJ79488, highly similar to Homo sapiens solute carrier family 43, member 3 (SLC43A3), mRNA;cDNA FLJ54531, highly similar to Homo sapiens solute carrier family 43, member 3 (SLC43A3), mRNA;Protein FOAP-13;Solute carrier family 43 member 3;cDNA FLJ55251, highly similar to Homo sapiens solute carr…	PSEC0252;SLC43A3	cDNA FLJ54531, highly similar to Homo sapiens solute carrier family 43, member 3 (SLC43A3), mRNA;Bone marrow proteoglycan precursor;Solute carrier family 43 member 3;Uncharacterized protein;cDNA FLJ55251, highly similar to Homo sapiens solute carrier famil	A8K2X6;B0AZP8;B4DNR8;E7EQD2;Q8NBI5;E9PS74;B4DV87;E9PJT6	5	1	1	1.4	55.864	504	0.077527	0.64495	2970800	1556800	1414000
CML33;Phenylalanine--tRNA ligase alpha chain;Phenylalanyl-tRNA synthetase alpha chain;cDNA FLJ34774 fis, clone NT2NE2003309, highly similar to Phenylalanyl-tRNA synthetase alpha chain (EC 6.1.1.20);FARSLA protein;Phenylalanine-tRNA synthetase-like, alpha subunit, isoform CRA_b;cDNA FLJ50378, highly similar to Phenylalanyl-tRNA synthetase alpha chain (EC 6.1.1.20)	FARS;FARSA;FARSL;FARSLA;hCG_172485	Phenylalanyl-tRNA synthetase alpha chain;cDNA FLJ50378, highly similar to Phenylalanyl-tRNA synthetase alpha chain	Q9Y285;Q6IBR2;B4E363	2	2	2	4.1	57.563	508	3.3884e-14	0.64833	20234000	2203700	18030000
Putative Ig-like domain-containing protein DKFZp686O24166/DKFZp686I21167		B7 homolog 6	Q68D85	1	3	3	6.6	50.827	454	4.7442e-07	0.6485	11423000	4817100	6606100
6-phosphogluconolactonase	PGLS	6-phosphogluconolactonase	O95336	1	2	2	7.4	27.547	258	4.6878e-07	0.65018	3049200	2044800	1004400
Neuroendocrine-specific protein-like 2;Neuroendocrine-specific protein-like II;Reticulon-3;cDNA FLJ54729, highly similar to Homo sapiens reticulon 3 (RTN3), transcript variant 2, mRNA;cDNA FLJ60267, highly similar to Homo sapiens reticulon 3 (RTN3), transcript variant 2, mRNA;cDNA FLJ50772, highly similar to Reticulon-3	ASYIP;NSPL2;RTN3	Isoform 1 of Reticulon-3;Isoform 2 of Reticulon-3;cDNA FLJ60267, highly similar to Homo sapiens reticulon 3 (RTN3), transcript variant 2, mRNA;Isoform 4 of Reticulon-3;Isoform 3 of Reticulon-3	O95197-1;O95197;B7Z8W8;O95197-2;B7Z3E3;O95197-4;O95197-3;B7Z361	5	2	1	1.8	112.61	1032	4.9555e-11	0.65182	53061000	32039000	21023000
Protein NipSnap homolog 1;cDNA FLJ78131, highly similar to Homo sapiens nipsnap homolog 1 (C. elegans) (NIPSNAP1), mRNA;cDNA FLJ58042, highly similar to Protein NipSnap1;Putative uncharacterized protein NIPSNAP1	NIPSNAP1	Protein NipSnap homolog 1;protein NipSnap homolog 1 isoform 2;Protein	Q9BPW8;A8K4I8;B4DQI7;C9JDV8	3	2	1	5.3	33.31	284	0.0049656	0.65757	5721400	3771400	1950000
Alpha-tropomyosin;Tropomyosin alpha-1 chain;Tropomyosin-1;TPMsk1;cDNA FLJ16459 fis, clone BRCAN2002473, moderately similar to Tropomyosin, fibroblast isoform 2;Tropomyosin 1 (Alpha), isoform CRA_f;Putative uncharacterized protein TPM1;Tropomyosin 1 (Alpha), isoform CRA_o;Tropomyosin;Putative uncharacterized protein DKFZp586K2222;Tropomyosin 1 (Alpha), isoform CRA_a;Tropomyosin isoform;cDNA FLJ263…	C15orf13;TMSA;TPM1;hCG_33495;DKFZp586K2222	Isoform 3 of Tropomyosin alpha-1 chain;tropomyosin alpha-1 chain isoform 7;tropomyosin alpha-1 chain isoform 5;tropomyosin alpha-1 chain isoform 3;Isoform 4 of Tropomyosin alpha-1 chain;cDNA FLJ16459 fis, clone BRCAN2002473, moderately similar to Tropomyos	P09493-3;P09493;D9YZV5;D9YZV8;O15513;D9YZV2;Q8TCG4;D9YZV3;P09493-4;E7EVR8;Q6ZN40;P09493-1;C9IZA2;D9YZV4;Q07414;Q9Y427;Q15657;P09493-2;Q6ZP76	11	8	1	24.6	32.876	284	6.6218e-40	0.66279	3272300	2782000	490350
UPF0568 protein C14orf166;cDNA, FLJ92278;Chromosome 14 open reading frame 166, isoform CRA_a;CLE7;Lcrp369;CLE	C14orf166;CGI-99;hCG_22667	UPF0568 protein C14orf166	Q9Y224;Q549M8;Q5RLJ0	1	2	2	7	28.068	244	0.019553	0.66356	4272400	2828400	1444000
47 kDa mannose 6-phosphate receptor-binding protein;Cargo selection protein TIP47;Mannose-6-phosphate receptor-binding protein 1;Perilipin-3;Placental protein 17	M6PRBP1;PLIN3;TIP47	Isoform B of Perilipin-3;Isoform 3 of Perilipin-3;perilipin-3 isoform 3	O60664-1;O60664;O60664-3;O60664-2	3	2	2	6.5	47.074	434	3.9511e-18	0.66419	2032100	920520	1111600
cDNA FLJ60026, highly similar to Tricarboxylate transport protein, mitochondrial;Solute carrier family 25 (Mitochondrial carrier; citrate transporter), member 1, isoform CRA_b;Citrate transport protein;Solute carrier family 25 member 1;Tricarboxylate carrier protein;Tricarboxylate transport protein, mitochondrial;Mitochondrial citrate transport protein	hCG_17246;SLC25A1;SLC20A3	Plasma membrane citrate carrier;Tricarboxylate transport protein, mitochondrial	B4DP62;D9HTE9;P53007;Q6LAP8	2	2	2	6.3	35.052	318	0.00033027	0.66789	16565000	3509800	13056000
Prefoldin subunit 2;cDNA, FLJ96845, Homo sapiens prefoldin 2 (PFDN2), mRNA	HSPC231;PFD2;PFDN2;hCG_1995291;RP11-544M22.10-001	Prefoldin subunit 2	Q9UHV9;B1AQP2	1	4	4	29.2	16.648	154	1.6535e-38	0.67207	7893400	4709600	3183800
Vacuolar ATPase isoform VA68;Vacuolar proton pump subunit alpha;V-ATPase 69 kDa subunit;V-type proton ATPase catalytic subunit A;cDNA FLJ51804, highly similar to Vacuolar ATP synthase catalytic subunit A, ubiquitous isoform (EC 3.6.3.14);Putative uncharacterized protein ATP6V1A	ATP6A1;ATP6V1A;ATP6V1A1;VPP2	V-type proton ATPase catalytic subunit A;cDNA FLJ51804, highly similar to Vacuolar ATP synthase catalytic subunit A, ubiquitous isoform	P38606;B7Z1R5;C9JA17	4	5	5	8.6	68.303	617	1.8034e-45	0.6749	9800300	5140600	4659700
Glutathione S-transferase Mu 3;GST class-mu 3;GSTM3-3;cDNA FLJ51755, highly similar to Glutathione S-transferase Mu 3 (EC 2.5.1.18);Glutathione S-transferase M3 variant;cDNA, FLJ93985, Homo sapiens glutathione S-transferase M3 (brain) (GSTM3), mRNA;Glutathione S-transferase M3 (Brain);GSTM3 protein;Brain type mu-glutathione S-transferase	GST5;GSTM3;hCG_40244;RP4-735C1.2-001	Glutathione S-transferase Mu 3;Brain type mu-glutathione S-transferase	P21266;B4E2J2;Q59EJ5;Q6FGJ9;A4UJ43	10	5	5	23.6	26.559	225	7.0402e-33	0.68001	21140000	12313000	8826900
Adapter protein GRB2;Growth factor receptor-bound protein 2;Protein Ash;SH2/SH3 adapter GRB2;cDNA, FLJ96637, Homo sapiens growth factor receptor-bound protein 2 (GRB2), mRNA;Growth factor receptor-bound protein 2, isoform CRA_a;cDNA FLJ33691 fis, clone BRAWH2002976, highly similar to GROWTH FACTOR RECEPTOR-BOUND PROTEIN 2;GRB2 protein	ASH;GRB2;hCG_27179	Isoform 1 of Growth factor receptor-bound protein 2	P62993-1;P62993;B0LPF3;B3KR50;Q6ICN0	2	5	5	18.4	25.206	217	1.2459e-09	0.6801	22153000	12306000	9847000
CD49 antigen-like family member D;Integrin alpha-4;Integrin alpha-IV;VLA-4 subunit alpha;Alpha-4 integrin;Integrin alpha 4 variant;ITGA4 protein;Integrin alpha-4 subunit;cDNA FLJ59131, highly similar to Integrin alpha-4;cDNA FLJ60208, highly similar to Integrin alpha-4	CD49D;ITGA4;IA4	Similar to Integrin alpha-4 subunit;Uncharacterized protein	P13612;Q13682;Q59H74;Q68EM9;Q6PJE7;Q8IU66;Q8IUA2;B4E045;B4E0Q2;E7EP60;E7ESG7;Q8IU71	2	2	2	1.6	115.33	1038	0.040237	0.68322	2025400	1091300	934100
RAB18 long isoform 1;Ras-related protein Rab-18;cDNA FLJ51678, highly similar to Ras-related protein Rab-18;cDNA FLJ53088, highly similar to Ras-related protein Rab-18;RAB18, member RAS oncogene family variant;RAB18, member RAS oncogene family;cDNA FLJ50154, moderately similar to Ras-related protein Rab-18;PNAS-32	RAB18;RP11-148B2.1-003;RP11-148B2.1-005	RAB18 long isoform 1;Ras-related protein Rab-18;cDNA FLJ51678, highly similar to Ras-related protein Rab-18;cDNA FLJ53088, highly similar to Ras-related protein Rab-18;RAB18, member RAS oncogene family;RAB18, member RAS oncogene family;cDNA FLJ50154, moder	Q56UN9;Q9NP72;B7Z4P9;B7Z5V3;Q59EW3;Q5W0J0;Q5W0I9;B7Z333;Q9BZT2	8	2	2	9.4	26.41	235	5.4595e-06	0.68379	4588700	2629900	1958800
Isoleucine--tRNA ligase;Isoleucyl-tRNA synthetase, cytoplasmic;Isoleucyl-tRNA synthetase, cytoplasmic variant;Putative uncharacterized protein DKFZp686L17145;Putative uncharacterized protein DKFZp686L0869;Isoleucyl-tRNA synthetase;Putative uncharacterized protein IARS;IARS protein;cDNA FLJ55373, highly similar to Isoleucyl-tRNA synthetase, cytoplasmic (EC 6.1.1.5);PRO0785	IARS;DKFZp686L17145;DKFZp686L0869;RP11-62C3.1-002;RP11-62C3.1-003	Isoleucyl-tRNA synthetase, cytoplasmic;Uncharacterized protein;132 kDa protein;IARS protein;cDNA FLJ55373, highly similar to Isoleucyl-tRNA synthetase, cytoplasmic	P41252;Q59G75;Q7Z355;Q7Z3U5;Q5TCD1;Q6P0M4;B4DVX2;Q5TCC4;Q7L4K8;Q9P1N9	7	5	5	3.8	144.5	1262	7.8491e-10	0.68562	3941700	1531300	2410500
ERT1;Extracellular signal-regulated kinase 2;MAP kinase isoform p42;Mitogen-activated protein kinase 1;Mitogen-activated protein kinase 2;Mitogen-activated protein kinase 1, isoform CRA_a;cDNA FLJ58314, highly similar to Mitogen-activated protein kinase 1 (EC 2.7.11.24);Extracellular signal-regulated kinase-2 splice variant	ERK2;MAPK1;PRKM1;PRKM2;hCG_32557	Mitogen-activated protein kinase 1;cDNA FLJ58314, highly similar to Mitogen-activated protein kinase 1;Extracellular signal-regulated kinase-2 splice variant	P28482;Q1HBJ4;Q499G7;B4DHN0;A8CZ64	11	5	4	11.7	41.389	360	5.7513e-06	0.68596	12391000	7048000	5343400
Coiled-coil domain-containing protein 83	CCDC83;HSD9	Isoform 2 of Coiled-coil domain-containing protein 83;Isoform 1 of Coiled-coil domain-containing protein 83	Q8IWF9-2;Q8IWF9;Q8IWF9-1	2	1	1	1.8	52.408	444	0.18685	0.6861	4681700	2863700	1818000
Calcium pump 2;Calcium-transporting ATPase sarcoplasmic reticulum type, slow twitch skeletal muscle isoform;Endoplasmic reticulum class 1/2 Ca(2+) ATPase;Sarcoplasmic/endoplasmic reticulum calcium ATPase 2;ATPase CA++ transporting cardiac muscle slow twitch 2;SERCA Ca(2+)-ATPase	ATP2A2;ATP2B	Isoform 1 of Sarcoplasmic/endoplasmic reticulum calcium ATPase 2;Isoform 4 of Sarcoplasmic/endoplasmic reticulum calcium ATPase 2;Isoform 3 of Sarcoplasmic/endoplasmic reticulum calcium ATPase 2;110 kDa protein;Isoform 2 of Sarcoplasmic/endoplasmic reticul	P16615-1;P16615;P16615-4;B0FYL2;B1PM99;P16615-3;P16615-2;P16615-5	18	9	9	8.1	114.76	1042	7.8252e-28	0.69032	23479000	11336000	12142000
Transmembrane protein 41B;cDNA FLJ54898, highly similar to Homo sapiens transmembrane protein 41B (TMEM41B), mRNA	KIAA0033;TMEM41B	Isoform 1 of Transmembrane protein 41B;Uncharacterized protein;Isoform 2 of Transmembrane protein 41B;transmembrane protein 41B isoform 2	Q5BJD5-1;Q5BJD5;B4E0E0;E9PJ42;Q5BJD5-2;E9PP29	4	2	2	6.2	32.513	291	0.0027735	0.69616	5131200	2953900	2177300
Claudin-1;Senescence-associated epithelial membrane protein;cDNA, FLJ93310, Homo sapiens claudin 1 (CLDN1), mRNA;Claudin 1;Claudin 1, isoform CRA_a;Claudin-2;cDNA FLJ51889, highly similar to Claudin-1	CLD1;CLDN1;SEMP1;UNQ481/PRO944;hCG_17574	Claudin-1;cDNA FLJ51889, highly similar to Claudin-1	O95832;A5JSJ9;Q7Z4X9;B4DLC3	2	4	4	19.9	22.744	211	3.7588e-18	0.70118	18207000	11548000	6658800
Mitochondrial 2-oxoglutarate/malate carrier protein;Solute carrier family 25 member 11;cDNA FLJ76014, highly similar to Homo sapiens solute carrier family 25 (mitochondrial carrier; oxoglutarate carrier), member 11 (SLC25A11), mRNA;SLC25A11 protein;Solute carrier family 25 (Mitochondrial carrier; oxoglutarate carrier), member 11, isoform CRA_b	SLC20A4;SLC25A11;hCG_32694	Mitochondrial 2-oxoglutarate/malate carrier protein;mitochondrial 2-oxoglutarate/malate carrier protein isoform 2;mitochondrial 2-oxoglutarate/malate carrier protein isoform 3	Q02978;Q6IBH0	3	6	6	18.8	34.061	314	5.6961e-32	0.70287	18344000	10793000	7550800
Small nuclear ribonucleoprotein Sm D2;snRNP core protein D2	SNRPD1;SNRPD2	Small nuclear ribonucleoprotein Sm D2;small nuclear ribonucleoprotein Sm D2 isoform 2	P62316	2	3	3	24.6	13.527	118	1.4098e-14	0.70534	5006800	3255300	1751400
Gene associated with retinoic and interferon-induced mortality 12 protein;KM-102-derived reductase-like factor;Thioredoxin reductase 1, cytoplasmic;Thioredoxin reductase TR1;cDNA FLJ56205, highly similar to Thioredoxin reductase 1, cytoplasmic (EC 1.8.1.9);Thioredoxin reductase 1;cDNA FLJ46672 fis, clone TRACH3009008, highly similar to Thioredoxin reductase (EC 1.6.4.5);cDNA FLJ56075, highly simi…	GRIM12;KDRF;TXNRD1;hCG_1812757	Isoform 1 of Thioredoxin reductase 1, cytoplasmic;Isoform 6 of Thioredoxin reductase 1, cytoplasmic;Uncharacterized protein;Isoform 3 of Thioredoxin reductase 1, cytoplasmic;Uncharacterized protein;Isoform 4 of Thioredoxin reductase 1, cytoplasmic;cDNA FLJ	Q16881-1;Q16881;B7Z904;Q16881-6;E7EW10;E9PNQ6;Q16881-3;E7ESI6;E9PIR7;Q6ZR44;Q16881-4;B7Z2S5;Q16881-2;E2QRB9;Q16881-5;B2R5P6;B7Z1F4;B7Z3Y8;E9PMY9	10	4	4	6.2	70.858	649	1.0911e-22	0.7056	25812000	21176000	4635700
Defender against cell death 1;Dolichyl-diphosphooligosaccharide--protein glycosyltransferase subunit DAD1;Defender against cell death 1 variant	DAD1	Dolichyl-diphosphooligosaccharide--protein glycosyltransferase subunit DAD1;10 kDa protein	P61803;Q53G02	4	3	3	26.5	12.497	113	9.1141e-13	0.7057	13022000	10345000	2676600
CCT-theta;Renal carcinoma antigen NY-REN-15;T-complex protein 1 subunit theta;Chaperonin containing TCP1, subunit 8 (Theta) variant;cDNA FLJ53379, highly similar to T-complex protein 1 subunit theta;CCT8 protein;Chaperonin containing TCP1, subunit 8 (Theta), isoform CRA_c;cDNA FLJ59382, highly similar to T-complex protein 1 subunit theta	C21orf112;CCT8;CCTQ;KIAA0002;hCG_1810843	T-complex protein 1 subunit theta;59 kDa protein;cDNA FLJ53379, highly similar to T-complex protein 1 subunit theta;cDNA FLJ59382, highly similar to T-complex protein 1 subunit theta	P50990;Q53HU0;B4DEM7;Q7Z759;B4DQH4	5	14	14	25.4	59.62	548	2.7199e-74	0.70856	85222000	27851000	57371000
Implantation-associated protein;Magnesium transporter protein 1;cDNA FLJ56344, highly similar to Implantation-associated protein;Putative uncharacterized protein MAGT1;cDNA FLJ55087, highly similar to Implantation-associated protein;Novel protein;cDNA FLJ14726 fis, clone NT2RP3001727, highly similar to Rattus norvegicus implantation-associated protein (IAG2) mRNA	IAG2;MAGT1;PSEC0084;UNQ628/PRO1244;RP11-217H1.1;RP11-217H1.1-003	magnesium transporter protein 1;Novel protein;cDNA FLJ14726 fis, clone NT2RP3001727, highly similar to Rattus norvegicus implantation-associated protein (IAG2) mRNA	Q9H0U3;B4DH58;A8MUP5;B4DKW5;Q5JTA8;Q96SP2	4	4	4	8.7	41.531	367	7.7735e-08	0.70967	6772500	3476700	3295800
Ephrin type-A receptor 2;Epithelial cell kinase;Tyrosine-protein kinase receptor ECK;cDNA FLJ51229, highly similar to Ephrin type-A receptor 2 (EC 2.7.10.1);Soluble EPHA2 variant 1;Protein tyrosine kinase;EPHA2 protein	ECK;EPHA2	Ephrin type-A receptor 2;EPHA2 protein	P29317;B4DL04;B5A968;Q8IZL0;Q96HF4	5	12	9	12.4	108.27	976	1.059e-82	0.71184	114980000	43714000	71268000
Dolichyl-diphosphooligosaccharide--protein glycosyltransferase 63 kDa subunit;Dolichyl-diphosphooligosaccharide--protein glycosyltransferase subunit 2;RIBIIR;Ribophorin II;Ribophorin-2;cDNA, FLJ96923, highly similar to Homo sapiens ribophorin II (RPN2), mRNA;Putative uncharacterized protein RPN2;cDNA FLJ60278, highly similar to Dolichyl-diphosphooligosaccharide--proteinglycosyltransferase 63 kDa …	RPN2;hCG_37142;RP3-343K2.2-003;RP3-343K2.2-006;RP3-343K2.2-007	Dolichyl-diphosphooligosaccharide--protein glycosyltransferase subunit 2;dolichyl-diphosphooligosaccharide--protein glycosyltransferase subunit 2 isoform 2 precursor;Uncharacterized protein;Uncharacterized protein	P04844;B2RE46;A6NKT1;B4DJL0;Q5JYR6;C9J2G8;Q5JYR3;E9PC30;Q5JYR2	4	4	4	6.2	69.283	631	4.782e-50	0.71442	43922000	24508000	19414000
110 kDa cell membrane glycoprotein;Adhesion-regulating molecule 1;Proteasomal ubiquitin receptor ADRM1;Proteasome regulatory particle non-ATPase 13;Rpn13 homolog;Putative uncharacterized protein DKFZp686G2045	ADRM1;GP110;DKFZp686G2045	Proteasomal ubiquitin receptor ADRM1;Uncharacterized protein;Conserved hypothetical protein	Q16186;E9PEC0;Q68E00	3	2	2	5.9	42.153	407	5.5011e-07	0.71781	3875000	1954400	1920600
Putative uncharacterized protein IGSF3;Glu-Trp-Ile EWI motif-containing protein 3;Immunoglobulin superfamily member 3	IGSF3;EWI3;KIAA0466	immunoglobulin superfamily member 3 isoform 1;Isoform 2 of Immunoglobulin superfamily member 3;Immunoglobulin superfamily member 3 precursor	A6NJZ6;O75054-2;O75054;O75054-1	5	8	8	6.5	137.51	1214	8.8192e-23	0.71827	27698000	11921000	15776000
Phosphate carrier protein, mitochondrial;Phosphate transport protein;Solute carrier family 25 member 3;cDNA, FLJ96465, highly similar to Homo sapiens solute carrier family 25 (mitochondrial carrier;phosphate carrier), member 3 (SLC25A3), nuclear gene encodingmitochondrial protein, transcript variant 1b, mRNA;Solute carrier family 25 member 3 isoform b variant;Putative uncharacterized protein DKFZ…	OK/SW-cl.48;PHC;SLC25A3;DKFZp686J11229	Isoform A of Phosphate carrier protein, mitochondrial;Isoform B of Phosphate carrier protein, mitochondrial	Q00325-1;Q00325;Q00325-2;B2RE88;Q53HC3;Q6MZF9;Q8NCF7	2	9	9	20.2	40.094	362	2.2207e-53	0.71886	114210000	62629000	51585000
CUB domain-containing protein 1;Membrane glycoprotein gp140;Subtractive immunization M plus HEp3-associated 135 kDa protein;Transmembrane and associated with src kinases	CDCP1;TRASK;UNQ2486/PRO5773	Isoform 1 of CUB domain-containing protein 1;Isoform 2 of CUB domain-containing protein 1	Q9H5V8-1;Q9H5V8;Q9H5V8-2	3	15	15	18.1	92.931	836	8.3309e-64	0.72036	245980000	110400000	135580000
Histone acetyltransferase type B subunit 2;Histone-binding protein RBBP7;Nucleosome-remodeling factor subunit RBAP46;Retinoblastoma-binding protein 7;Retinoblastoma-binding protein p46;Retinoblastoma binding protein 7;RBBP7 protein;Retinoblastoma binding protein 7, isoform CRA_a;cDNA FLJ77317, highly similar to Homo sapiens retinoblastoma binding protein 7 (RBBP7), mRNA;cDNA FLJ34592 fis, clone K…	RBAP46;RBBP7;RP11-716A19.5-006;hCG_20110;RP11-716A19.5-010;RP11-716A19.5-008;RBAP48;RBBP4;RP11-716A19.5-004	Histone-binding protein RBBP7;Uncharacterized protein;histone-binding protein RBBP7 isoform 1;Isoform 1 of Histone-binding protein RBBP4;Isoform 2 of Histone-binding protein RBBP4;Isoform 3 of Histone-binding protein RBBP4;Uncharacterized protein;Isoform 4	Q16576;Q5JNZ9;Q6FHQ0;B0R0W4;E9PC52;A8K6A2;Q5JP00;Q09028-1;Q09028;Q09028-2;Q09028-3;E9PFM2;Q5JP01;Q09028-4	16	4	4	8.7	47.82	425	5.2395e-09	0.72146	14220000	6616400	7603500
cDNA FLJ56329, highly similar to Myosin light polypeptide 6;17 kDa myosin light chain;Myosin light chain 3;Myosin light chain alkali 3;Myosin light polypeptide 6;Smooth muscle and nonmuscle myosin light chain alkali 6;MYL6 protein	MYL6	cDNA FLJ56329, highly similar to Myosin light polypeptide 6;Isoform Non-muscle of Myosin light polypeptide 6;Isoform Smooth muscle of Myosin light polypeptide 6	B7Z6Z4;P60660-1;P60660;P60660-2;Q6IBG5	9	5	5	23.9	26.707	238	3.9248e-40	0.72192	24273000	15875000	8398100
Dual specificity mitogen-activated protein kinase kinase 1;ERK activator kinase 1;MAPK/ERK kinase 1;cDNA FLJ76051, highly similar to Homo sapiens mitogen-activated protein kinase kinase 1 (MAP2K1), mRNA;Mitogen-activated protein kinase kinase 1;Mitogen-activated protein kinase kinase 1, isoform CRA_a;cDNA FLJ58770, highly similar to Dual specificity mitogen-activated protein kinase kinase 1 (EC 2…	MAP2K1;MEK1;PRKMK1;hCG_24510	Isoform 1 of Dual specificity mitogen-activated protein kinase kinase 1;Isoform 2 of Dual specificity mitogen-activated protein kinase kinase 1	Q02750-1;Q02750;A4QPA9;B4DFY5;Q02750-2	2	4	2	10.7	43.439	393	3.9934e-20	0.72202	3102900	779840	2323100
75 kDa glucose-regulated protein;Heat shock 70 kDa protein 9;Mortalin;Peptide-binding protein 74;Stress-70 protein, mitochondrial;HSPA9 protein;cDNA FLJ51811, highly similar to Stress-70 protein, mitochondrial;cDNA FLJ51907, highly similar to Stress-70 protein, mitochondrial;Heat shock 70 kDa protein 9B;Catecholamine-regulated protein 40;cDNA FLJ51903, highly similar to Stress-70 protein, mitocho…	GRP75;HSPA9;HSPA9B	Stress-70 protein, mitochondrial;cDNA FLJ51907, highly similar to Stress-70 protein, mitochondrial;cDNA FLJ51903, highly similar to Stress-70 protein, mitochondrial	P38646;Q8N1C8;B7Z1V7;B7Z4V2;D6RJI2;Q2F839;A1XP52;B7Z4T3	5	18	18	27.4	73.68	679	7.8184e-161	0.72279	117240000	63438000	53800000
ER-Golgi SNARE of 24 kDa;SEC22 vesicle-trafficking protein homolog B;SEC22 vesicle-trafficking protein-like 1;Vesicle-trafficking protein SEC22b	SEC22B;SEC22L1	Vesicle-trafficking protein SEC22b	O75396	1	5	5	25.1	24.593	215	8.056e-35	0.72548	6690600	3741800	2948800
GP150;Integrin beta-4;Integrin beta	ITGB4;hCG_27538	Isoform Beta-4C of Integrin beta-4;Isoform Beta-4B of Integrin beta-4;Isoform Beta-4A of Integrin beta-4;Isoform Beta-4D of Integrin beta-4	P16144-1;P16144;P16144-3;B7ZLD5;B7ZLD8;Q0VF97;P16144-2;A0AVL6;Q2VP98;Q59H46;P16144-4	6	14	14	7.9	202.16	1822	9.1017e-54	0.72655	44535000	22455000	22080000
CCAAT-binding transcription factor I subunit A;DNA-binding protein B;Enhancer factor I subunit A;Nuclease-sensitive element-binding protein 1;Y-box transcription factor;Y-box-binding protein 1;YBX1 protein;Nuclease sensitive element binding protein-1;Putative uncharacterized protein YBX1;Cold shock domain-containing protein A;DNA-binding protein A;Single-strand DNA-binding protein NF-GMB;Contrin;…	NSEP1;YB1;YBX1;CSDA;DBPA;CSDA3;MSY2;YBX2	Nuclease-sensitive element-binding protein 1;Nuclease sensitive element binding protein-1;Uncharacterized protein;Protein;Isoform 1 of DNA-binding protein A;Y-box-binding protein 2;Similar to YB-1 protein;Isoform 3 of DNA-binding protein A;Isoform 2 of DNA	P67809;A0JLU4;Q05D43;Q6PKI6;E7ETA0;Q7KZ24;C9J5V9;P16989-1;P16989;Q9Y2T7;B2RCC2;P16989-3;P16989-2;Q96GD7;Q59EB5	10	2	2	8.3	35.924	324	1.1049e-31	0.72741	7310200	2153000	5157300
Apoptosis-inducing factor 1, mitochondrial;Programmed cell death protein 8;Apoptosis-inducing factor;Striatal apoptosis-inducing factor;Apoptosis-inducing factor short isoform 2;Apoptosis-inducing factor short isoform 3	AIF;AIFM1;PDCD8	Isoform 1 of Apoptosis-inducing factor 1, mitochondrial;Isoform 3 of Apoptosis-inducing factor 1, mitochondrial;apoptosis-inducing factor 1, mitochondrial isoform 5 precursor;Apoptosis-inducing factor short isoform 3	O95831-1;O95831;O95831-3;Q5RZ99;Q5RZA0;Q1L6K6;Q1L6K4	6	7	7	12.9	66.9	613	1.0816e-29	0.72742	15850000	7246100	8603700
Nicotinamide phosphoribosyltransferase;Pre-B-cell colony-enhancing factor 1;Visfatin;Putative uncharacterized protein DKFZp666B131;cDNA FLJ55038, highly similar to Nicotinamide phosphoribosyltransferase (EC 2.4.2.12)	NAMPT;PBEF;PBEF1;DKFZp666B131	Nicotinamide phosphoribosyltransferase;42 kDa protein;cDNA FLJ55038, highly similar to Nicotinamide phosphoribosyltransferase	P43490;Q658Z1;B7Z8W6	3	1	1	2.4	55.52	491	0.0021354	0.7318	3172200	1790700	1381500
cDNA, FLJ95068, highly similar to Homo sapiens eukaryotic translation elongation factor 1 delta (guanine nucleotide exchange protein) (EEF1D), transcript variant 1, mRNA;Antigen NY-CO-4;Elongation factor 1-delta;Eukaryotic translation elongation factor 1 delta (Guanine nucleotide exchange protein), isoform CRA_b;FP1047;cDNA: FLJ20897 fis, clone ADKA03573;EEF1D protein;Eukaryotic translation elong…	EEF1D;EF1D;hCG_1994718	Uncharacterized protein;Isoform 2 of Elongation factor 1-delta;Uncharacterized protein;EEF1D protein;Isoform 1 of Elongation factor 1-delta;Uncharacterized protein;elongation factor 1-delta isoform 4;Protein;Uncharacterized protein;Uncharacterized protein;	B2RAR6;E9PRY8;P29692-2;P29692;D3DWK1;Q71RH4;Q9H7G6;E9PQR8;Q9BW34;P29692-1;E9PK01;Q4VBZ6;E9PI39;E9PQ49;E9PL71;E9PL12;E9PPR1;E9PIZ1;E9PMW7;E9PN91	21	3	3	4.7	76.569	697	6.8868e-56	0.73414	6412300	3724300	2687900
Antioxidant enzyme AOE372;Peroxiredoxin IV;Peroxiredoxin-4;Thioredoxin peroxidase AO372;Thioredoxin-dependent peroxide reductase A0372;Putative uncharacterized protein PRDX4	PRDX4	Peroxiredoxin-4;Uncharacterized protein;Protein	Q13162;A6NJJ0;E9PEN3	3	4	2	13.3	30.54	271	4.9931e-13	0.73442	17780000	10518000	7261700
65 kDa FK506-binding protein;FK506-binding protein 10;Immunophilin FKBP65;Peptidyl-prolyl cis-trans isomerase FKBP10;Rotamase;Putative uncharacterized protein DKFZp666D193;cDNA FLJ23972 fis, clone HEP18230, highly similar to 65 kDa FK506-binding protein (EC 5.2.1.8);cDNA FLJ53423, highly similar to FK506-binding protein 10 (EC 5.2.1.8);cDNA FLJ35389 fis, clone SKNMC2000635, moderately similar to …	FKBP10;FKBP65;PSEC0056;DKFZp666D193	Peptidyl-prolyl cis-trans isomerase FKBP10;59 kDa protein;cDNA FLJ53423, highly similar to FK506-binding protein 10;Uncharacterized protein	Q96AY3;Q658U4;Q6ZME7;B4DJJ5;E9PCN0;Q8NAG5	4	2	2	2.9	64.244	582	0.00056673	0.73813	3613500	2010800	1602800
Polypeptide GalNAc transferase 2;Polypeptide N-acetylgalactosaminyltransferase 2;Polypeptide N-acetylgalactosaminyltransferase 2 soluble form;Protein-UDP acetylgalactosaminyltransferase 2;UDP-GalNAc:polypeptide N-acetylgalactosaminyltransferase 2;cDNA FLJ58625, highly similar to Polypeptide N-acetylgalactosaminyltransferase 2 (EC 2.4.1.41);cDNA FLJ58016, highly similar to Polypeptide N-acetylgala…	GALNT2	Polypeptide N-acetylgalactosaminyltransferase 2;61 kDa protein;cDNA FLJ58016, highly similar to Polypeptide N-acetylgalactosaminyltransferase2;cDNA FLJ58226, highly similar to Polypeptide N-acetylgalactosaminyltransferase 2	Q10471;B7Z6K2;B7Z462;B7Z8V8	5	8	8	12.3	64.732	571	5.6353e-24	0.73965	38613000	18622000	19990000
7-dehydrocholesterol reductase;Putative sterol reductase SR-2;Sterol Delta(7)-reductase;cDNA FLJ77740, highly similar to Homo sapiens 7-dehydrocholesterol reductase, mRNA;cDNA, FLJ93191, Homo sapiens 7-dehydrocholesterol reductase (DHCR7), mRNA;cDNA FLJ51181, highly similar to 7-dehydrocholesterol reductase (EC 1.3.1.21)	D7SR;DHCR7	7-dehydrocholesterol reductase;cDNA FLJ51181, highly similar to 7-dehydrocholesterol reductase;Uncharacterized protein;Uncharacterized protein	Q9UBM7;A8K0D2;B2R6Z2;B4E1K5;E9PM00;E9PMT8	9	4	4	8.2	54.489	475	4.3337e-36	0.74003	100450000	40704000	59742000
cDNA FLJ55427, highly similar to Sodium/potassium-transporting ATPase alpha-1 chain (EC 3.6.3.9);cDNA FLJ60077, highly similar to Sodium/potassium-transporting ATPase alpha-1 chain (EC 3.6.3.9);Sodium pump subunit alpha-1;Sodium/potassium-transporting ATPase subunit alpha-1;cDNA FLJ53830, highly similar to Sodium/potassium-transporting ATPase alpha-1 chain (EC 3.6.3.9);ATPase, Na+/K+ transporting…	ATP1A1;hCG_37943;RP4-655J12.1-008;RP4-655J12.1-002	sodium/potassium-transporting ATPase subunit alpha-1 isoform c;Isoform Long of Sodium/potassium-transporting ATPase subunit alpha-1;sodium/potassium-transporting ATPase subunit alpha-1 isoform d;Uncharacterized protein;Isoform Short of Sodium/potassium-tra	B7Z2T5;B7Z3V1;P05023-1;P05023;B7Z1N5;B7Z3U6;Q5TC02;E7EMH3;Q5TC01;P05023-2	25	31	31	29.4	113	1023	9.1692e-299	0.74006	749370000	333870000	415500000
Argininosuccinate synthase;Citrulline--aspartate ligase;cDNA FLJ54252, highly similar to Argininosuccinate synthase (EC 6.3.4.5);Argininosuccinate synthetase 1	ASS;ASS1;hCG_31245;RP11-618A20.2-002;RP11-618A20.2-001	Argininosuccinate synthase;Uncharacterized protein;Argininosuccinate synthetase 1	P00966;A8KAP9;Q5T6L4;B4E395;E9PDT0;Q5T6L7	5	3	3	5.3	50.817	450	0.0033917	0.74051	5606000	2833200	2772800
Interleukin-31 receptor subunit beta;Oncostatin-M-specific receptor subunit beta	OSMR;OSMRB	Isoform 1 of Oncostatin-M-specific receptor subunit beta	Q99650-1;Q99650	5	3	3	2.5	110.51	979	0.016156	0.7448	2038800	784740	1254000
ADP-ribosylation factor-like protein 6-interacting protein 5;Cytoskeleton-related vitamin A-responsive protein;Dermal papilla-derived protein 11;Glutamate transporter EAAC1-interacting protein;GTRAP3-18;JM5;PRA1 family protein 3;Prenylated Rab acceptor protein 2;Protein JWa;Putative MAPK-activating protein PM27;cDNA FLJ90131 fis, clone HEMBB1000447, highly similar to PRA1 family protein 3;cDNA FL…	ARL6IP5;DERP11;HSPC127;JWA;PRA2;PRAF3	PRA1 family protein 3;Uncharacterized protein	O75915;B3KQB4;B4DZZ0;E9PER8	2	2	2	7.4	21.614	188	0.0045888	0.7449	15573000	7617200	7956000
2-5-oligoadenylate-binding protein;ATP-binding cassette sub-family E member 1;HuHP68;Ribonuclease 4 inhibitor;RNase L inhibitor	ABCE1;OK/SW-cl.40;RLI;RNASEL1;RNASELI;RNS4I	ATP-binding cassette sub-family E member 1;Uncharacterized protein;Uncharacterized protein;16 kDa protein	P61221;D6R9I9;D6RGF4	4	3	3	4.8	67.314	599	1.4065e-08	0.74557	4760800	2425600	2335200
PAI1 RNA-binding protein 1;Plasminogen activator inhibitor 1 RNA-binding protein;SERPINE1 mRNA-binding protein 1;SERPINE1 mRNA binding protein 1, isoform CRA_c;SERPINE1 mRNA binding protein 1, isoform CRA_d;Putative uncharacterized protein DKFZp686P17171;cDNA, FLJ92551, Homo sapiens PAI-1 mRNA-binding protein (PAI-RBP1), mRNA;PAI-1 mRNA-binding protein variant;SERPINE1 mRNA binding protein 1	CGI-55;PAIRBP1;SERBP1;hCG_2032021;DKFZp686P17171;RP11-393N21.3-001	SERPINE1 mRNA binding protein 1, isoform CRA_d;Isoform 2 of Plasminogen activator inhibitor 1 RNA-binding protein;Isoform 3 of Plasminogen activator inhibitor 1 RNA-binding protein;Isoform 4 of Plasminogen activator inhibitor 1 RNA-binding protein	Q8NC51-1;Q8NC51;D3DQ69;D3DQ70;Q8NC51-2;Q63HR1;Q8NC51-3;Q8NC51-4;Q5VU21	4	2	2	6.2	50.92	465	2.3389e-62	0.74578	8934600	4417000	4517500
Aldehyde dehydrogenase 10;Aldehyde dehydrogenase family 3 member A2;Fatty aldehyde dehydrogenase;Microsomal aldehyde dehydrogenase;Aldehyde dehydrogenase 3A2 variant;Putative uncharacterized protein DKFZp686E23276;Aldehyde dehydrogenase 3 family, member A2, isoform CRA_a;ALDH3A2 protein;cDNA FLJ77712, highly similar to Homo sapiens aldehyde dehydrogenase 3 family, member A2 (ALDH3A2),mRNA;cDNA, F…	ALDH10;ALDH3A2;FALDH;DKFZp686E23276;hCG_30680	Isoform 2 of Fatty aldehyde dehydrogenase;Isoform 1 of Fatty aldehyde dehydrogenase	P51648-2;P51648;P51648-1;Q59H65;Q68D64;Q6I9T3	3	5	5	9.8	57.669	508	8.9068e-14	0.74957	12039000	5595400	6444000
Cisplatin resistance-related protein 9;Cleft lip and palate transmembrane protein 1-like protein;cDNA FLJ46605 fis, clone THYMU3047760, highly similar to Homo sapiens cisplatin resistance related protein CRR9p (CRR9), mRNA	CLPTM1L;CRR9	Isoform 1 of Cleft lip and palate transmembrane protein 1-like protein;Isoform 2 of Cleft lip and palate transmembrane protein 1-like protein	Q96KA5-1;Q96KA5;Q96KA5-2;B3KY18	2	1	1	2.4	62.228	538	0.0039288	0.75366	3629600	1733500	1896000
CD49 antigen-like family member B;Collagen receptor;Integrin alpha-2;Platelet membrane glycoprotein Ia;VLA-2 subunit alpha	CD49B;ITGA2	Integrin alpha-2;Uncharacterized protein;Uncharacterized protein	P17301;E7ESP4;F1C628;F1C629;E7EMF1	5	15	15	13.7	129.29	1181	6.8982e-92	0.75468	98528000	49459000	49070000
PRA1 family protein 2;cDNA FLJ13371 fis, clone PLACE1000656, highly similar to PRA1 family protein 2;Putative uncharacterized protein WDR45;cDNA FLJ57916, highly similar to WD repeat domain phosphoinositide-interacting protein 4;Putative uncharacterized protein PRAF2	JM4;PRAF2;WDR45	PRA1 family protein 2;Uncharacterized protein;Uncharacterized protein	O60831;B3KN29;A6NM71;B4DFG8;A6NP52	3	2	2	10.1	19.258	178	1.2316e-09	0.75598	8514300	5731000	2783400
Electron transfer flavoprotein subunit beta;cDNA FLJ77343, highly similar to Homo sapiens electron-transfer-flavoprotein, beta polypeptide(ETFB), mRNA	ETFB;FP585	Isoform 1 of Electron transfer flavoprotein subunit beta;Isoform 2 of Electron transfer flavoprotein subunit beta	P38117-1;P38117;A8K766;P38117-2	2	4	4	14.5	27.843	255	1.4976e-07	0.75653	5448000	3542600	1905300
cDNA FLJ59791, highly similar to Importin-11;Importin-11;Ran-binding protein 11;cDNA FLJ13115 fis, clone NT2RP3002631, highly similar to Importin-11	IPO11;RANBP11	importin-11 isoform 1;Importin-11;100 kDa protein;55 kDa protein;Protein;7 kDa protein	B4DZ73;Q9UI26;B3KN03	6	2	2	1.8	117.01	1015	0.00060591	0.75655	3073600	2106000	967550
Mitochondrial import inner membrane translocase subunit Tim23;Putative mitochondrial import inner membrane translocase subunit Tim23B;cDNA FLJ57459, highly similar to Mitochondrial import inner membrane translocase subunit Tim23;Translocase of inner mitochondrial membrane 23 homolog (Yeast);Putative uncharacterized protein TIMM23B;Putative uncharacterized protein TIMM23	TIM23;TIMM23;TIMM23B;RP11-481A12.7-002;RP11-481A12.7-007	Mitochondrial import inner membrane translocase subunit Tim23;Putative mitochondrial import inner membrane translocase subunit Tim23B;hypothetical protein LOC653252;cDNA FLJ57459, highly similar to Mitochondrial import inner membrane translocase subunit Ti	O14925;Q5SRD1;B1APJ0;C9JSY4;C9JV18;B1APJ1;E9PB91	9	2	2	8.6	21.943	209	6.425e-05	0.75994	3850800	2304000	1546800
Brain-heart protocadherin;Protocadherin-7	BHPCDH;PCDH7	protocadherin-7 isoform d precursor;protocadherin-7 isoform c precursor;Isoform B of Protocadherin-7;Isoform A of Protocadherin-7	O60245-3;O60245;O60245-2;O60245-1	4	7	7	6.2	136.57	1255	6.1373e-111	0.76003	45654000	17775000	27878000
WD repeat-containing protein 92;WD repeat-containing protein Monad;HZGJ;Putative uncharacterized protein PPP3R1;Calcineurin subunit B type 1;Protein phosphatase 2B regulatory subunit 1;Protein phosphatase 3 regulatory subunit B alpha isoform 1	WDR92;HZGJ;PPP3R1;CNA2;CNB	HZGJ;37 kDa protein;Uncharacterized protein;Calcineurin subunit B type 1;18 kDa protein	Q96MX6;Q86YQ0;D3YTA9;P63098	5	2	2	2.4	84.72	765	9.1475e-06	0.76266	8517400	7452700	1064700
cDNA FLJ56016, highly similar to C-1-tetrahydrofolate synthase, cytoplasmic;C-1-tetrahydrofolate synthase, cytoplasmic;Formyltetrahydrofolate synthetase;Methenyltetrahydrofolate cyclohydrolase;Methylenetetrahydrofolate dehydrogenase	MTHFC;MTHFD;MTHFD1	cDNA FLJ56016, highly similar to C-1-tetrahydrofolate synthase, cytoplasmic;C-1-tetrahydrofolate synthase, cytoplasmic	B7Z809;P11586	2	8	8	8.1	110.5	1020	8.4142e-28	0.76424	17485000	7151500	10333000
Mitochondrial import inner membrane translocase subunit Tim9	TIM9;TIM9A;TIMM9;TIMM9A	Mitochondrial import inner membrane translocase subunit Tim9	Q9Y5J7	1	2	2	21.3	10.378	89	6.9877e-05	0.76707	4353300	2699300	1654000
Acylglycerol kinase, mitochondrial;Multiple substrate lipid kinase;Multiple substrate lipid kinase, isoform CRA_a;Putative uncharacterized protein FLJ10842;cDNA FLJ61206, highly similar to Homo sapiens multiple substrate lipid kinase (MULK), mRNA;cDNA FLJ59963, highly similar to Homo sapiens multiple substrate lipid kinase (MULK), mRNA	AGK;MULK;FLJ10842;hCG_39451;tcag7.330	Isoform 1 of Acylglycerol kinase, mitochondrial;Uncharacterized protein;cDNA FLJ59963, highly similar to Homo sapiens multiple substrate lipid kinase (MULK), mRNA	Q53H12-1;Q53H12;A4D1U5;B4E2Z8;E9PC15;B4DR72;E9PG39	3	4	4	10.2	47.137	422	8.6187e-07	0.7806	3139300	1230400	1908800
Inositol 1,4,5-triphosphate receptor-interacting protein;Protein DANGER	DANGER;ITPRIP;KIAA1754	Inositol 1,4,5-triphosphate receptor-interacting protein;13 kDa protein	Q8IWB1	2	2	2	3.3	62.059	547	4.2635e-12	0.78121	2796000	1249600	1546400
Complex I-PDSW;NADH dehydrogenase [ubiquinone] 1 beta subcomplex subunit 10;NADH-ubiquinone oxidoreductase PDSW subunit;cDNA FLJ78612, highly similar to Homo sapiens NADH dehydrogenase (ubiquinone) 1 beta subcomplex, 10, 22kDa (NDUFB10), mRNA;cDNA, FLJ92003, Homo sapiens NADH dehydrogenase (ubiquinone) 1 beta subcomplex, 10,22kDa (NDUFB10), mRNA;NADH dehydrogenase (Ubiquinone) 1 beta subcomplex, …	NDUFB10;hCG_42700	NADH dehydrogenase [ubiquinone] 1 beta subcomplex subunit 10;NDUFB10 protein	O96000;A8K761;Q96II6;Q96RX5	2	3	3	18.6	20.776	172	2.1321e-21	0.78162	9532800	5472500	4060300
Alu corepressor 1;Antioxidant enzyme B166;Liver tissue 2D-page spot 71B;Peroxiredoxin V;Peroxiredoxin-5, mitochondrial;Peroxisomal antioxidant enzyme;PLP;Thioredoxin peroxidase PMP20;Thioredoxin reductase;TPx type VI;Putative uncharacterized protein PRDX5;Peroxiredoxin 5	ACR1;PRDX5;SBBI10	Isoform Mitochondrial of Peroxiredoxin-5, mitochondrial;peroxiredoxin-5, mitochondrial isoform b precursor;Isoform Cytoplasmic+peroxisomal of Peroxiredoxin-5, mitochondrial	P30044-1;P30044;A6NG06;B7ZLJ4;P30044-2	4	5	5	29.9	22.086	214	2.3761e-40	0.78273	101450000	59847000	41607000
Integrin alpha-V;Integrin alpha-V heavy chain;Integrin alpha-V light chain;Vitronectin receptor subunit alpha;ITGAV protein;cDNA FLJ51414, highly similar to Integrin alpha-V	ITGAV;MSK8;VNRA	Isoform 1 of Integrin alpha-V;Isoform 2 of Integrin alpha-V;integrin alpha-V isoform 2	P06756-1;P06756;A5YM53;B7ZLX0;P06756-2;B7Z883;E7EWZ6	5	28	28	24	116.04	1048	7.6054e-168	0.78487	1281000000	1037500000	243450000
Protein kish-A	TMEM167;TMEM167A	Protein kish-A;protein kish-A-like	Q8TBQ9	2	1	1	12.5	8.0598	72	0.012636	0.78571	8218300	5362700	2855600
Glutamate/H(+) symporter 1;Mitochondrial glutamate carrier 1;Solute carrier family 25 member 22;Glutamate/H(+) symporter 2;Mitochondrial glutamate carrier 2;Solute carrier family 25 member 18	GC1;SLC25A22;GC2;SLC25A18	Mitochondrial glutamate carrier 1;Mitochondrial glutamate carrier 2;Uncharacterized protein;Uncharacterized protein	Q9H936;Q9H1K4;E9PJH7;E9PS95	12	3	3	7.4	34.47	323	0.00018353	0.78749	5056300	2623100	2433200
Transmembrane protein 2;TMEM2 protein;cDNA FLJ61402, highly similar to Homo sapiens transmembrane protein 2 (TMEM2), mRNA	KIAA1412;TMEM2	Transmembrane protein 2;transmembrane protein 2 isoform b;cDNA FLJ61402, highly similar to Homo sapiens transmembrane protein 2 (TMEM2), mRNA	Q9UHN6;B2RTQ6;B4DTX3;E7EW17	7	20	20	13.1	154.37	1383	2.9468e-50	0.78882	41004000	18467000	22536000
eIF-3 p48;Eukaryotic translation initiation factor 3 subunit 6;Eukaryotic translation initiation factor 3 subunit E;Viral integration site protein INT-6 homolog;cDNA, FLJ93685, highly similar to Homo sapiens eukaryotic translation initiation factor 3, subunit 6 48kDa (EIF3S6), mRNA;cDNA FLJ42184 fis, clone THYMU2031994, highly similar to Eukaryotic translation initiation factor 3 subunit 6;Eukary…	EIF3E;EIF3S6;INT6;hCG_2008794	Eukaryotic translation initiation factor 3 subunit E;Uncharacterized protein	P60228;B2R806;B3KW56;Q6IAX5;E5RGA2	4	3	3	6.1	52.22	445	0.0067458	0.78886	5269700	2390100	2879600
Elongation factor 1-alpha 1;Elongation factor Tu;Eukaryotic elongation factor 1 A-1;Leukocyte receptor cluster member 7;Elongation factor 1-alpha;cDNA FLJ54032, highly similar to Elongation factor 1-alpha 1;Eukaryotic elongation factor 1 A-like 3;Putative elongation factor 1-alpha-like 3;Eukaryotic translation elongation factor 1 alpha 1;EEF1A1 protein;Putative uncharacterized protein;Eukaryotic …	EEF1A;EEF1A1;EF1A;LENG7;EEF1A1L14;PTI-1;hCG_2033271;RP11-505P4.2-001;EEF1AL3;RP11-505P4.2-015;EEF1A2;EEF1AL;STN	Elongation factor 1-alpha 1;Putative elongation factor 1-alpha-like 3;EEF1A1 protein;Elongation factor 1-alpha;Similar to Elongation factor 1-alpha 1;cDNA FLJ52573, highly similar to Elongation factor 1-alpha 1;Elongation factor 1-alpha 2	P68104;A8K9C4;B4DV42;B4E2C5;E7EUM7;Q16577;Q53G85;Q53G89;Q53GA1;Q53GE9;Q53HM9;Q53HQ7;Q53HR1;Q53HR5;Q6IPN6;Q6IPS9;Q6IPT9;Q8IUB0;Q96RE1;Q5VTE0;Q2F837;Q504Z0;Q6IQ15;Q6P082;Q6P4C9;Q8TBL1;Q96C29;Q96CD8;Q96EB3;A9X7H1;Q5JR01;Q9H2I7;Q9NZS6;B4DNE0;Q05639	13	11	11	22.3	50.14	462	4.6662e-34	0.79285	637620000	274810000	362810000
Protein disulfide-isomerase TMX3;Thioredoxin domain-containing protein 10;Thioredoxin-related transmembrane protein 3;TMX3 protein	KIAA1830;TMX3;TXNDC10	Isoform 1 of Protein disulfide-isomerase TMX3;TMX3 protein (Fragment)	Q96JJ7-1;Q96JJ7;Q96JJ7-2;Q3B7X1	2	2	2	3.5	51.871	454	0.11806	0.79331	3964000	1791700	2172300
Glucose transporter type 1, erythrocyte/brain;HepG2 glucose transporter;Solute carrier family 2, facilitated glucose transporter member 1;cDNA FLJ16785 fis, clone NT2RI2015342, highly similar to Solute carrier family 2, facilitated glucose transporter member 1;Solute carrier family 2 (Facilitated glucose transporter), member 1;Solute carrier family 2 (Facilitated glucose transporter), member 1 va…	GLUT1;SLC2A1	Solute carrier family 2, facilitated glucose transporter member 1;cDNA FLJ55703, highly similar to Solute carrier family 2, facilitated glucose transporter member 1;cDNA FLJ60414, highly similar to Solute carrier family 2, facilitated glucose transporter m	P11166;B3KVN0;Q0P512;Q59GX2;B4DKW1;B4DDR6;C9JIM8	4	2	2	3.7	54.083	492	2.454e-18	0.79435	34309000	18643000	15666000
Deoxyuridine 5-triphosphate nucleotidohydrolase, mitochondrial;dUTP pyrophosphatase	DUT	Isoform 1 of Deoxyuridine 5-triphosphate nucleotidohydrolase, mitochondrial;Isoform 3 of Deoxyuridine 5-triphosphate nucleotidohydrolase, mitochondrial;Isoform 2 of Deoxyuridine 5-triphosphate nucleotidohydrolase, mitochondrial;deoxyuridine 5-triphosph	P33316-1;P33316;P33316-3;P33316-2	4	7	7	27.4	26.706	252	1.6934e-15	0.79449	25870000	14246000	11624000
Ribonucleoside-diphosphate reductase large subunit;Ribonucleoside-diphosphate reductase subunit M1;Ribonucleotide reductase large subunit;Ribonucleoside-diphosphate reductase;cDNA FLJ51133, highly similar to Ribonucleoside-diphosphate reductase large subunit (EC 1.17.4.1);cDNA FLJ51135, highly similar to Ribonucleoside-diphosphate reductase large subunit (EC 1.17.4.1)	RR1;RRM1	Ribonucleoside-diphosphate reductase large subunit;Ribonucleoside-diphosphate reductase;Ribonucleoside-diphosphate reductase;Uncharacterized protein;52 kDa protein	P23921;B4E0I8;Q53GZ5;B4DNN4;B4DXB0;B4DS95;E9PD78;B4DXD1;E9PL69	5	2	2	2.4	90.069	792	0.00019177	0.79766	1834900	853320	981540
Cyclophilin A;Cyclosporin A-binding protein;Peptidyl-prolyl cis-trans isomerase A;Rotamase A;Peptidyl-prolyl cis-trans isomerase;cDNA FLJ75025, highly similar to Homo sapiens peptidylprolyl isomerase A (cyclophilin A) (PPIA), transcript variant 2, mRNA;Peptidylprolyl isomerase A (Cyclophilin A)	CYPA;PPIA	Peptidyl-prolyl cis-trans isomerase A;Peptidyl-prolyl cis-trans isomerase;cDNA FLJ75025, highly similar to Homo sapiens peptidylprolyl isomerase A (cyclophilin A) (PPIA), transcript variant 2, mRNA	P62937;A8K220;A8K486;B2RE56;Q71V99;B4DM82;Q567Q0	17	7	6	32.1	18.012	165	1.9512e-18	0.79778	62791000	41976000	20815000
Beta-thionase;Cystathionine beta-synthase;Serine sulfhydrase;cDNA FLJ53863, highly similar to Cystathionine beta-synthase (EC 4.2.1.22);cDNA FLJ53928, highly similar to Cystathionine beta-synthase (EC 4.2.1.22);Putative uncharacterized protein DKFZp727E011;Putative uncharacterized protein	CBS;DKFZp727E011	Isoform 2 of Cystathionine beta-synthase;Isoform 1 of Cystathionine beta-synthase;cDNA FLJ53863, highly similar to Cystathionine beta-synthase;Putative uncharacterized protein;Protein	P35520-2;P35520;P35520-1;B7Z2D6;B7Z6W5;Q9NTF0;Q3LR94;Q96EH7	5	2	2	3.2	61.862	565	9.523e-05	0.80121	6163200	2869400	3293800
Cell migration-inducing gene 5 protein;p21-Rac1;Ras-like protein TC25;Ras-related C3 botulinum toxin substrate 1;cDNA FLJ77333, highly similar to Homo sapiens ras-related C3 botulinum toxin substrate 1 (rho family, small GTP binding protein Rac1) (RAC1), transcript variant Rac1b, mRNA;Ras-related C3 botulinum toxin substrate 1 (Rho family, small GTP binding protein Rac1);Ras-related C3 botulinum …	MIG5;RAC1;TC25;hCG_14926;tcag7.839;RAC2;RAC3;hCG_1811995;RP1-151B14.8-007;RP1-151B14.8-004;RP1-151B14.8-003	Isoform B of Ras-related C3 botulinum toxin substrate 1;Isoform A of Ras-related C3 botulinum toxin substrate 1;Ras-related C3 botulinum toxin substrate 2;Ras-related C3 botulinum toxin substrate 3;Ras-related C3 botulinum toxin substrate 2 (Rho family, sm	P63000-2;P63000;A4D2P0;P63000-1;A4D2P1;A4D2P2;P15153;P60763;B1AH80;B1AH77;B1AH78	7	2	2	8.5	23.467	211	3.4002e-22	0.80748	6108600	2781200	3327400
CAAX prenyl protease 1 homolog;Farnesylated proteins-converting enzyme 1;Prenyl protein-specific endoprotease 1;Zinc metalloproteinase Ste24 homolog;cDNA FLJ14968 fis, clone THYRO1000288, highly similar to CAAX prenyl protease 1 homolog (EC 3.4.24.84)	FACE1;STE24;ZMPSTE24	CAAX prenyl protease 1 homolog	O75844;B3KNM6	1	6	6	10.9	54.812	475	7.8438e-33	0.80823	38010000	19974000	18036000
5-nucleotidase;Ecto-5-nucleotidase;cDNA, FLJ95508, highly similar to Homo sapiens 5-nucleotidase, ecto (CD73) (NT5E), mRNA;cDNA FLJ90602 fis, clone PLACE1001464, highly similar to 5-nucleotidase;5-nucleotidase, ecto (CD73), isoform CRA_a;5-nucleotidase, ecto (CD73);cDNA FLJ90527 fis, clone NT2RP4001467, highly similar to 5-nucleotidase (EC 3.1.3.5);5-nucleotidase, ecto (CD73), isoform CRA_c;NT5E …	NT5;NT5E;NTE;hCG_401111;RP11-321N4.1-003;RP11-321N4.1-002	5-nucleotidase;5-nucleotidase isoform 2 preproprotein;NT5E protein	P21589;B2RBH2;B3KQK1;Q53Z63;Q6NZX3;B3KQI8;Q5JRQ2;Q96B60	4	4	4	6.8	63.367	574	2.5205e-09	0.80936	6977900	3299700	3678200
Elongation factor 2;Similar to Elongation factor 2b;EEF2 protein;cDNA FLJ56548, highly similar to Elongation factor 2;cDNA FLJ58164, highly similar to Elongation factor 2	EEF2;EF2	Elongation factor 2;EEF2 protein (Fragment);cDNA FLJ56548, highly similar to Elongation factor 2;cDNA FLJ58164, highly similar to Elongation factor 2	P13639;Q8TA90;Q6PK56;B4DPU3;B4DRE8	6	17	17	18.8	95.337	858	5.3646e-86	0.80985	192470000	90845000	101620000
ATL-derived factor;Surface-associated sulphydryl protein;Thioredoxin;Thioredoxin, isoform CRA_b;Thioredoxin delta 3	TRDX;TRX;TRX1;TXN;hCG_28763;RP11-427L11.1-002;TXN delta 3	Thioredoxin;Thioredoxin, isoform CRA_b	P10599;B1ALW1;O60744	2	4	4	31.4	11.737	105	2.6279e-25	0.8108	249690000	135320000	114370000
14-3-3 protein tau;14-3-3 protein T-cell;14-3-3 protein theta;Protein HS1;Putative uncharacterized protein YWHAQ;cDNA FLJ52118, highly similar to 14-3-3 protein theta;cDNA FLJ51144, highly similar to 14-3-3 protein theta;cDNA, FLJ79057, highly similar to 14-3-3 protein theta	YWHAQ	14-3-3 protein theta;Uncharacterized protein;cDNA FLJ52118, highly similar to 14-3-3 protein theta	P27348;E9PG15;Q53RR5;B4DMT8;B4DY04;Q53S41	4	14	8	52.2	27.764	245	5.5481e-132	0.81152	324900000	176630000	148270000
C-Myc-binding protein Mm-1;Myc modulator 1;Prefoldin subunit 5;MM-1 gamma;Prefoldin subunit 5, isoform CRA_c	MM1;PFD5;PFDN5;hCG_23361;mm-1	Prefoldin subunit 5;prefoldin subunit 5 isoform gamma	Q99471;Q9C083	2	2	2	16.2	17.328	154	2.8147e-35	0.81505	2976200	1698600	1277600
2,3-cyclic-nucleotide 3-phosphodiesterase;cDNA FLJ59866, highly similar to 2,3-cyclic-nucleotide 3-phosphodiesterase (EC 3.1.4.37);cDNA FLJ52954, highly similar to 2,3-cyclic-nucleotide 3-phosphodiesterase(EC 3.1.4.37)	CNP	Isoform CNPII of 2,3-cyclic-nucleotide 3-phosphodiesterase;Isoform CNPI of 2,3-cyclic-nucleotide 3-phosphodiesterase	P09543-1;P09543;P09543-2;B4DFN6;B4DI06	2	2	2	5.5	47.578	421	1.0987e-05	0.81562	3397200	1851700	1545600
Cytochrome c oxidase assembly protein COX15 homolog;cDNA FLJ54125, highly similar to Cytochrome c oxidase assembly protein COX15	COX15	Isoform 1 of Cytochrome c oxidase assembly protein COX15 homolog;Isoform 2 of Cytochrome c oxidase assembly protein COX15 homolog	Q7KZN9-1;Q7KZN9;B4DQM2;Q7KZN9-2	2	2	2	3.9	46.03	410	0.023573	0.82048	4220500	2399900	1820600
Nicastrin;cDNA, FLJ95633, Homo sapiens nicastrin (NCSTN), mRNA;Nicastrin, isoform CRA_a;cDNA FLJ51641, highly similar to Nicastrin;cDNA FLJ60331, highly similar to Nicastrin	KIAA0253;NCSTN;UNQ1874/PRO4317;hCG_20858;RP11-517F10.1-001;RP11-517F10.1-011;RP11-517F10.1-006;RP11-517F10.1-008;RP11-517F10.1-012	Isoform 1 of Nicastrin;Isoform 2 of Nicastrin;50 kDa protein;Uncharacterized protein;cDNA FLJ60331, highly similar to Nicastrin;Nicastrin;Nicastrin	Q92542-1;Q92542;Q5T208;Q92542-2;B4DJN0;E9PC09;Q5T204;B4DR82;E7ENA9;Q5T209;Q5T206;Q5T205	7	5	5	6.6	78.41	709	1.606e-16	0.82381	115110000	63235000	51880000
17-beta-hydroxysteroid dehydrogenase 10;3-hydroxy-2-methylbutyryl-CoA dehydrogenase;3-hydroxyacyl-CoA dehydrogenase type II;3-hydroxyacyl-CoA dehydrogenase type-2;Endoplasmic reticulum-associated amyloid beta-peptide-binding protein;Mitochondrial ribonuclease P protein 2;Short-chain type dehydrogenase/reductase XH98G2;Type II HADH;HADH2 protein;Hydroxyacyl-Coenzyme A dehydrogenase, type II, isofo…	ERAB;HADH2;HSD17B10;MRPP2;SCHAD;XH98G2;hCG_19788;RP3-339A18.2-001;RP3-339A18.2-004	Isoform 1 of 3-hydroxyacyl-CoA dehydrogenase type-2;Isoform 2 of 3-hydroxyacyl-CoA dehydrogenase type-2;Hydroxysteroid (17-beta) dehydrogenase 10	Q99714-1;Q99714;Q6IBS9;Q99714-2;Q5H928	3	4	4	21.1	26.923	261	2.3396e-71	0.82412	63325000	52167000	11158000
55 kDa actin-bundling protein;Fascin;p55;Singed-like protein;cDNA FLJ37935 fis, clone CTONG2005290, highly similar to FASCIN;FSCN1 protein	FAN1;FSCN1;HSN;SNL	Fascin;52 kDa protein	Q16658;B3KTA3;Q96IH1	2	2	2	3.4	54.529	493	0.0015779	0.82577	2399500	1420000	979520
Truncated MHC class I polypeptide-related sequence A;PERB11.1 protein;MHC class I chain-related protein A;cDNA FLJ60820, highly similar to Homo sapiens MHC class I polypeptide-related sequence A (MICA), mRNA;MHC class I polypeptide-related sequence A;MHC class I polypeptide-related sequence A, isoform CRA_c;Stress inducible class I homolog;MICA protein;MHC class I-like molecule PERB11.1-13.1;MHC …	MICA;PERB11.1;DASS-38L18.1-001;hCG_2001511;XXbac-BCX25O20.4-001;XXbac-BPG181B23.1-001;DASS-38L18.1-002;XXbac-BCX25O20.4-002;XXbac-BPG181B23.1-002;DAMA-345G11.2-002;DASS-38L18.1-003;XXbac-BCX25O20.4-003;XXbac-BPG181B23.1-003	MHC class I polypeptide-related sequence A isoform 2 (MICA*00801) precursor;Uncharacterized protein;Similar to MICA protein;MHC class I polypeptide-related sequence A;MHC class I polypeptide-related sequence A	C0LZS1;P78551;Q7JFP0;Q95IC0;Q96QC4;Q99691;Q99693;Q99696;Q9UDZ9;Q9UE01;Q9UE02;Q9UE03;Q9UMF1;Q5SS59;B0FYL6;B0FYL7;B0FZD0;E7BBQ2;Q0EFB3;Q2L6G1;Q99695;B0V1E9;P79527;P79530;P79531;P79533;P79539;P79540;Q5SS58;Q9GJ27;Q9GJ30;Q9GJ32	9	3	2	7.5	37.833	332	6.3197e-19	0.83144	101730000	45034000	56697000
Putrescine aminopropyltransferase;Spermidine synthase	SPS1;SRM;SRML1	Spermidine synthase	P19623	1	2	2	7	33.824	302	0.00023622	0.83214	7443500	6027400	1416100
CTP synthase 1;CTP synthetase 1;UTP--ammonia ligase 1;cDNA FLJ60075, highly similar to CTP synthase 1 (EC 6.3.4.2);cDNA FLJ58563, highly similar to CTP synthase 1 (EC 6.3.4.2);cDNA FLJ59392, highly similar to CTP synthase 1 (EC 6.3.4.2);cDNA FLJ54863, highly similar to CTP synthase 1 (EC 6.3.4.2)	CTPS	CTP synthase 1;cDNA FLJ59392, highly similar to CTP synthase 1;cDNA FLJ54863, highly similar to CTP synthase 1	P17812;B4DMB5;B4E1E0;B4DR64;B7Z9C4	3	4	4	6.8	66.69	591	7.6298e-24	0.8425	10074000	6294200	3779500
Ubiquitin C variant;Putative uncharacterized protein;cDNA FLJ75516, highly similar to Xenopus tropicalis ubiquitin C, mRNA;UBC protein;Ubiquitin C splice variant;cDNA FLJ32377 fis, clone SKMUS1000014, highly similar to Polyubiquitin 9;Putative uncharacterized protein DKFZp434K0435;Ubiquitin B;Ubiquitin B, isoform CRA_a;40S ribosomal protein S27a;cDNA, FLJ96793, Homo sapiens ribosomal protein S27a…	UBC;DKFZp434K0435;hCG_1998947;UBB;RPS27A;UBA80;UBCEP1;hCG_1987923;UBA52;UBCEP2;hCG_37048	Polyubiquitin-C;cDNA FLJ75516, highly similar to Xenopus tropicalis ubiquitin C, mRNA;60 kDa protein;cDNA FLJ32377 fis, clone SKMUS1000014, highly similar to Polyubiquitin 9;Polyubiquitin-B;19 kDa protein;18 kDa protein;Ubiquitin-40S ribosomal protein S27a	P0CG48;Q59EM9;Q66K58;A8K674;Q96H31;Q5PY61;Q96C32;Q96MH4;Q9UFQ0;P0CG47;Q5U5U6;P62979;B2RDW1;Q5RKT7;B4DV12;Q5UGI3;P62987;Q3MIH3;Q49A90	25	4	4	51.2	77.028	685	1.3541e-68	0.84312	227770000	107440000	120320000
Transmembrane protein C9orf46	AD025;C9orf46;MDS030	Transmembrane protein C9orf46	Q9HBL7	1	3	3	18.4	17.201	147	1.1876e-10	0.8449	8134200	5005100	3129100
24-dehydrocholesterol reductase;3-beta-hydroxysterol delta-24-reductase;Diminuto/dwarf1 homolog;Seladin-1;cDNA FLJ53870, highly similar to 24-dehydrocholesterol reductase (EC1.3.1.-);cDNA, FLJ79318, highly similar to 24-dehydrocholesterol reductase (EC 1.3.1.-);cDNA FLJ55321, highly similar to 24-dehydrocholesterol reductase (EC 1.3.1.-);cDNA, FLJ79326, highly similar to 24-dehydrocholesterol red…	DHCR24;KIAA0018;Nbla03646	Delta(24)-sterol reductase;cDNA FLJ53870, highly similar to 24-dehydrocholesterol reductase;cDNA FLJ52052, highly similar to 24-dehydrocholesterol reductase	Q15392;B7Z817;B7ZAV4;Q3LIE7;B7Z546;B7Z919	4	5	5	8.7	60.101	516	1.0013e-17	0.8459	24726000	12894000	11833000
Hereditary hemochromatosis protein;HLA-H;cDNA FLJ57894, highly similar to Hereditary hemochromatosis protein homolog;Hemochromatosis;Hemochromatosis splice variant 861-2305del;Hereditary haemochromatosis protein	HFE;HLAH;HLA-H	Isoform 1 of Hereditary hemochromatosis protein;Uncharacterized protein;Isoform 5 of Hereditary hemochromatosis protein;Isoform 2 of Hereditary hemochromatosis protein;Hemochromatosis splice variant 861-2305del	Q30201-1;Q30201;B4DV50;Q30201-8;E9PEQ8;Q30201-5;Q86WL1;Q30201-2;Q9HC69;Q9UM46	5	1	1	3.4	40.108	348	0.048174	0.84728	2601900	1383700	1218200
Myopathy with excessive autophagy protein;Vacuolar ATPase assembly integral membrane protein VMA21	MEAX;VMA21;XMEA	Isoform 2 of Vacuolar ATPase assembly integral membrane protein VMA21;Isoform 1 of Vacuolar ATPase assembly integral membrane protein VMA21	Q3ZAQ7-2;Q3ZAQ7;Q3ZAQ7-1	2	2	2	14.7	17.766	156	4.224e-09	0.84879	8790300	4824100	3966300
Protein phosphatase 1C;Protein phosphatase 1G;Protein phosphatase 2C isoform gamma;Protein phosphatase magnesium-dependent 1 gamma;cDNA, FLJ92810, highly similar to Homo sapiens protein phosphatase 1G (formerly 2C), magnesium-dependent, gamma isoform (PPM1G), mRNA;cDNA FLJ45688 fis, clone FCBBF3021191, highly similar to Protein phosphatase 2C isoform gamma (EC 3.1.3.16);cDNA FLJ57252, highly simi…	PPM1C;PPM1G;hCG_21229	Protein phosphatase 1G;PPM1G protein	O15355;B2R665;B3KXL8;B4DDC8;Q6IAU5;Q96IN7	3	4	4	8.1	59.271	546	5.0139e-08	0.8491	3939300	1938100	2001100
3-methylcrotonyl-CoA carboxylase 2;3-methylcrotonyl-CoA carboxylase non-biotin-containing subunit;3-methylcrotonyl-CoA:carbon dioxide ligase subunit beta;Methylcrotonoyl-CoA carboxylase beta chain, mitochondrial;cDNA FLJ33515 fis, clone BRAMY2005662, highly similar to Methylcrotonoyl-CoA carboxylase beta chain, mitochondrial (EC 6.4.1.4)	MCCB;MCCC2	Isoform 1 of Methylcrotonoyl-CoA carboxylase beta chain, mitochondrial;Isoform 2 of Methylcrotonoyl-CoA carboxylase beta chain, mitochondrial;Uncharacterized protein;cDNA FLJ33515 fis, clone BRAMY2005662, highly similar to Methylcrotonoyl-CoA carboxylase b	Q9HCC0-1;Q9HCC0;Q9HCC0-2;D6R9R1;E5RI51;D6RDF7;B3KR24	5	2	2	3.6	61.332	563	4.3446e-05	0.85047	5374300	1833800	3540500
Conjugase;Gamma-glutamyl hydrolase;Gamma-Glu-X carboxypeptidase;GH;cDNA FLJ76254, highly similar to Homo sapiens gamma-glutamyl hydrolase (GGH), mRNA;cDNA FLJ55415, highly similar to Gamma-glutamyl hydrolase (EC 3.4.19.9)	GGH	Gamma-glutamyl hydrolase;Uncharacterized protein	Q92820;A8K335;B4DVI2;E5RGF0	2	3	3	9.1	35.964	318	1.9547e-09	0.85357	4357100	3383400	973730
Cell proliferation-inducing gene 46 protein;Cytokeratin-18;Keratin, type I cytoskeletal 18;Keratin-18;cDNA, FLJ94640, highly similar to Homo sapiens keratin 18 (KRT18), mRNA;Putative uncharacterized protein ENSP00000396184	CYK18;KRT18;PIG46	Keratin, type I cytoskeletal 18;Uncharacterized protein	P05783;B2RA03;C9JEA8	2	4	2	8.4	48.057	430	3.679e-31	0.85515	12474000	9202400	3271100
HSPA5-binding protein 1;Transmembrane protein 132A	HSPA5BP1;KIAA1583;TMEM132A	Isoform 2 of Transmembrane protein 132A;Isoform 1 of Transmembrane protein 132A;Isoform 4 of Transmembrane protein 132A;Protein	Q24JP5-2;Q24JP5;Q24JP5-1;Q24JP5-4	6	4	4	3.9	110.2	1024	1.2314e-08	0.85592	16209000	6329300	9879500
Coatomer subunit zeta-1;Zeta-1-coat protein;Coatomer protein complex, subunit zeta 1 variant	CGI-120;COPZ;COPZ1;HSPC181	Coatomer subunit zeta-1	P61923;Q53FU3	1	2	2	11.9	20.198	177	3.5068e-09	0.8588	9637900	5991500	3646300
Transmembrane protein 165;Transmembrane protein PT27;Transmembrane protein TPARL;cDNA FLJ30150 fis, clone BRACE2000300, highly similar to Transmembrane protein TPARL;cDNA FLJ60544, highly similar to Transmembrane protein TPARL	TMEM165;TPARL	Transmembrane protein 165;cDNA FLJ60544, highly similar to Transmembrane protein TPARL	Q9HC07;B3KNQ2;B4DHW1	2	1	1	3.4	34.905	324	0.0019233	0.85977	976210	509500	466710
Protein ITFG3;cDNA FLJ60496;Putative uncharacterized protein ITFG3	C16orf9;ITFG3	Isoform 1 of Protein ITFG3;Isoform 2 of Protein ITFG3;cDNA FLJ60496	Q9H0X4-1;Q9H0X4;Q9H0X4-2;B4DGG1;C9K0C5	8	3	3	5.6	59.659	552	1.052e-06	0.86093	8731600	4114600	4617000
Anthrax toxin receptor 1;Tumor endothelial marker 8;Tumor endothelial marker 8 isoform 3 variant	ANTXR1;ATR;TEM8	Isoform 1 of Anthrax toxin receptor 1;Isoform 2 of Anthrax toxin receptor 1;Isoform 4 of Anthrax toxin receptor 1;Isoform 3 of Anthrax toxin receptor 1;Anthrax toxin receptor 1, isoform CRA_a	Q9H6X2-1;Q9H6X2;E7EVM9;Q9H6X2-2;Q9H6X2-4;Q53FL1;Q9H6X2-3;D6W5F9	5	2	2	3.4	62.788	564	6.5028e-08	0.86322	3678800	2025200	1653600
Exportin(tRNA);Exportin-T;tRNA exportin;cDNA FLJ75831, highly similar to Homo sapiens exportin, tRNA (nuclear export receptor for tRNAs) (XPOT), mRNA	XPOT	Exportin-T;26 kDa protein	O43592;A8KA19	2	4	4	4.1	109.96	962	2.591e-07	0.8661	6817200	2598300	4218900
Probable fructose-2,6-bisphosphatase TIGAR;TP53-induced glycolysis and apoptosis regulator	C12orf5;TIGAR	Probable fructose-2,6-bisphosphatase TIGAR	Q9NQ88	1	2	2	7.4	30.062	270	0.0044787	0.86632	2318300	1391900	926400
Methionine--tRNA ligase;Methionyl-tRNA synthetase, cytoplasmic;cDNA FLJ76789, highly similar to Homo sapiens methionine-tRNA synthetase (MARS), mRNA;cDNA FLJ53309, highly similar to Methionyl-tRNA synthetase (EC 6.1.1.10)	MARS	Methionyl-tRNA synthetase, cytoplasmic;cDNA FLJ53309, highly similar to Methionyl-tRNA synthetase	P56192;A8K492;B4DF61	4	3	3	2.8	101.11	900	7.5765e-19	0.86708	10475000	6527500	3947100
eIF3 p35;eIF-3-alpha;Eukaryotic translation initiation factor 3 subunit 1;Eukaryotic translation initiation factor 3 subunit J;cDNA FLJ57599, moderately similar to Eukaryotic translation initiation factor 3 subunit 1	EIF3J;EIF3S1;PRO0391	Eukaryotic translation initiation factor 3 subunit J;23 kDa protein;cDNA FLJ57599, moderately similar to Eukaryotic translation initiation factor 3 subunit 1;Protein	O75822;B4DUI3	4	2	2	7.4	29.062	258	0.0023088	0.86779	2116000	1491800	624150
Prenylcysteine lyase;Prenylcysteine oxidase 1;cDNA FLJ51671, highly similar to Prenylcysteine oxidase (EC 1.8.3.5);cDNA, FLJ78912, highly similar to Prenylcysteine oxidase (EC 1.8.3.5);Putative uncharacterized protein PCYOX1;cDNA FLJ51879, highly similar to Prenylcysteine oxidase (EC 1.8.3.5)	KIAA0908;PCL1;PCYOX1;UNQ597/PRO1183	Prenylcysteine oxidase 1;cDNA, FLJ78912, highly similar to Prenylcysteine oxidase;cDNA FLJ51879, highly similar to Prenylcysteine oxidase;Uncharacterized protein;Uncharacterized protein;Uncharacterized protein	Q9UHG3;B7Z8A2;B7Z9P8;C9K055;B7Z3Y2;Q584P1;E9PH96;Q53ST0;C9JM55;C9JGT6	6	4	4	5.9	56.639	505	0.0023623	0.87025	13346000	5421700	7924300
Glycosylation-inhibiting factor;L-dopachrome isomerase;L-dopachrome tautomerase;Macrophage migration inhibitory factor;Phenylpyruvate tautomerase	GLIF;MIF;MMIF	Macrophage migration inhibitory factor	P14174;A6MUU8	1	2	2	17.4	12.476	115	8.1299e-17	0.8711	32896000	17111000	15785000
Plexin domain-containing protein 2;Tumor endothelial marker 7-related protein;cDNA FLJ61564, highly similar to Plexin domain-containing protein 2;Putative uncharacterized protein PLXDC2	PLXDC2;TEM7R;UNQ2514/PRO6003	Isoform 1 of Plexin domain-containing protein 2;Isoform 3 of Plexin domain-containing protein 2;Isoform 2 of Plexin domain-containing protein 2	Q6UX71-1;Q6UX71;B4E367;Q6UX71-3;B7WP84;Q6UX71-2	3	3	3	5.5	59.582	529	1.2056e-05	0.87144	10634000	7707100	2926600
Putative uncharacterized protein SSR1;cDNA, FLJ93042, highly similar to Homo sapiens signal sequence receptor, alpha (translocon-associated protein alpha) (SSR1), mRNA;Signal sequence receptor subunit alpha;Translocon-associated protein subunit alpha	SSR1;PSEC0262;TRAPA	Uncharacterized protein;Uncharacterized protein;Isoform 1 of Translocon-associated protein subunit alpha;Uncharacterized protein;Uncharacterized protein;Isoform 2 of Translocon-associated protein subunit alpha	C9IZQ1;B2R6N9;E9PAL7;P43307-1;P43307;C9J5W0;C9J3L8;P43307-2;C9JY01	6	2	2	6.4	33.887	298	1.9099e-16	0.87235	67353000	41425000	25928000
26S protease subunit S5 basic;26S proteasome non-ATPase regulatory subunit 5;26S proteasome subunit S5B;cDNA FLJ76282, highly similar to Homo sapiens proteasome (prosome, macropain) 26S subunit, non-ATPase, 5 (PSMD5), mRNA;cDNA FLJ52877, highly similar to 26S proteasome non-ATPase regulatory subunit 5	KIAA0072;PSMD5	26S proteasome non-ATPase regulatory subunit 5;cDNA FLJ52877, highly similar to 26S proteasome non-ATPase regulatory subunit 5	Q16401;A8K4T6;B4DZM8	2	2	2	3.8	56.195	504	0.0012357	0.87395	2177000	1118900	1058100
Solute carrier family 4 sodium bicarbonate cotransporter member 7;Putative uncharacterized protein SLC4A7;Sodium bicarbonate cotransporter 2;Sodium bicarbonate cotransporter 2b;Sodium bicarbonate cotransporter 3;Solute carrier family 4 member 7;Solute carrier family 4 sodium bicarbonate cotransporter member 7 truncated type 1b variant;Solute carrier family 4 sodium bicarbonate cotransporter membe…	SLC4A7;BT;NBC2;NBC2B;NBC3;SBC2;SLC4A6	Solute carrier family 4 sodium bicarbonate cotransporter member 7;Solute carrier family 4 sodium bicarbonate cotransporter member 7;Solute carrier family 4 sodium bicarbonate cotransporter member 7	B5M451;C9JST9;E9PDL9;B5M450;B5M453;Q9Y6M7-3;Q9Y6M7;B2CI53;C9JXL3;D3K174;D3K175	3	1	1	0.8	140.76	1259	0.0059937	0.87734	2078900	740680	1338200
ATP synthase subunit g, mitochondrial	ATP5L	ATP synthase subunit g, mitochondrial;Uncharacterized protein	O75964;E9PN17	2	5	5	46.6	11.428	103	2.1207e-49	0.87777	120510000	63167000	57343000
Nef-binding protein 1;Vacuolar proton pump subunit H;Vacuolar proton pump subunit SFD;V-ATPase 50/57 kDa subunits;VMA13;V-type proton ATPase subunit H;cDNA FLJ40986 fis, clone UTERU2014898, highly similar to Vacuolar ATP synthase subunit H (EC 3.6.3.14);Vacuolar proton pump subunit SFD alpha isoform;cDNA FLJ58444, highly similar to Vacuolar ATP synthase subunit H (EC 3.6.3.14)	ATP6V1H;CGI-11	Isoform 1 of V-type proton ATPase subunit H;Isoform 2 of V-type proton ATPase subunit H;cDNA FLJ58444, highly similar to Vacuolar ATP synthase subunit H;52 kDa protein	Q9UI12-1;Q9UI12;B3KUZ7;E9PGE6;Q8TF11;Q9UI12-2;B4E054	9	3	3	6.4	55.882	483	3.5103e-05	0.8783	4396500	1894600	2501900
cDNA FLJ76744, highly similar to Homo sapiens L1 cell adhesion molecule (L1CAM), transcript variant 1, mRNA;Neural cell adhesion molecule L1;L1 cell adhesion molecule;Non-neural L1CAM	CAML1;L1CAM;MIC5	cDNA FLJ76744, highly similar to Homo sapiens L1 cell adhesion molecule (L1CAM), transcript variant 1, mRNA;Isoform 1 of Neural cell adhesion molecule L1;140 kDa protein;Isoform 2 of Neural cell adhesion molecule L1;neural cell adhesion molecule L1 isoform	A8K139;P32004-1;P32004;Q7Z3Z9;P32004-2;A4ZYW4;Q7Z2H2;Q7Z2I3;Q7Z2J9;Q86SE4	13	32	32	23.5	140.16	1259	1.5575e-112	0.87858	324230000	117960000	206260000
Polyposis locus protein 1;Protein TB2;Receptor expression-enhancing protein 5;cDNA, FLJ92888, highly similar to Homo sapiens likely ortholog of mouse deleted in polyposis 1 (DP1), mRNA;cDNA FLJ53094, highly similar to Receptor expression-enhancing protein 5;cDNA FLJ59876, highly similar to Receptor expression-enhancing protein 5	C5orf18;DP1;REEP5;TB2	Receptor expression-enhancing protein 5;cDNA FLJ53094, highly similar to Receptor expression-enhancing protein 5;cDNA FLJ59876, highly similar to Receptor expression-enhancing protein 5;Uncharacterized protein	Q00765;B2R6C4;B7Z6B3;B7Z2A3;E2QRG8	7	6	6	21.2	21.493	189	5.3365e-25	0.87938	39602000	22024000	17578000
Activating signal cointegrator 1 complex subunit 3-like 1;BRR2 homolog;U5 small nuclear ribonucleoprotein 200 kDa helicase;U5 snRNP-specific 200 kDa protein;SNRNP200 protein;cDNA FLJ13778 fis, clone PLACE4000431, highly similar to H.sapiens U5 snRNP-specific 200kD protein	ASCC3L1;HELIC2;KIAA0788;SNRNP200	Isoform 1 of U5 small nuclear ribonucleoprotein 200 kDa helicase;u5 small nuclear ribonucleoprotein 200 kDa helicase-like, partial;Activating signal cointegrator 1 complex subunit 3-like 1	O75643-1;O75643;A4FU77;Q9H8B9;Q5ZF01	3	3	3	1.5	244.5	2136	0.0012296	0.88039	1223600	669870	553770
Solute carrier family 30 member 7;Zinc transporter 7;Znt-like transporter 2;Solute carrier family 30 (Zinc transporter), member 7	SLC30A7;ZNT7;ZNTL2;RP11-30G24.1-003	Zinc transporter 7;Solute carrier family 30 (Zinc transporter), member 7	Q8NEW0;B1AW85	2	3	3	6.6	41.625	376	0.0020751	0.8815	8157400	2645600	5511700
Colonic and hepatic tumor over-expressed gene protein;Cytoskeleton-associated protein 5;CKAP5 protein;cDNA FLJ35359 fis, clone SALGL1000107, highly similar to CH-TOG PROTEIN	CKAP5;KIAA0097	Isoform 3 of Cytoskeleton-associated protein 5;Isoform 1 of Cytoskeleton-associated protein 5;Isoform 2 of Cytoskeleton-associated protein 5;cDNA FLJ35359 fis, clone SALGL1000107, highly similar to CH-TOG PROTEIN	Q14008-3;Q14008;Q14008-1;Q8IYN5;Q14008-2;E7ER31;E9PQH5;Q8NAH3	4	2	2	1	226.25	2039	0.0024378	0.88985	1607800	967120	640630
CD36 and LIMPII analogous 1;CD36 antigen-like 1;Collagen type I receptor, thrombospondin receptor-like 1;Scavenger receptor class B member 1;SR-BI;SCARB1 protein;cDNA FLJ42118 fis, clone TESTI2005610, highly similar to Scavenger receptor class B member 1;cDNA FLJ61086, highly similar to Scavenger receptor class B member 1;Scavenger receptor class B member 1 variant;cDNA FLJ55139, highly similar t…	CD36L1;CLA1;SCARB1	Isoform 1 of Scavenger receptor class B member 1;SCARB1 protein;Isoform 4 of Scavenger receptor class B member 1;Isoform 2 of Scavenger receptor class B member 1;Isoform 3 of Scavenger receptor class B member 1;cDNA FLJ55139, highly similar to Scavenger re	Q8WTV0-2;Q8WTV0;B7ZKQ9;Q8WTV0-4;Q8WTV0-3;Q8WTV0-1;B3KW46;B4E3I1;Q59FM4;B4DZ71	9	6	6	9.2	56.973	509	8.3093e-13	0.90372	63591000	23116000	40475000
Kin of irregular chiasm-like protein 1;Kin of IRRE-like protein 1;Nephrin-like protein 1;Kin of IRRE like (Drosophila);cDNA FLJ56360, highly similar to Kin of IRRE-like protein 1	KIRREL;KIRREL1;NEPH1;RP11-444M10.2-003;RP11-444M10.2-002	Isoform 2 of Kin of IRRE-like protein 1;Isoform 1 of Kin of IRRE-like protein 1;cDNA FLJ56360, highly similar to Kin of IRRE-like protein 1;Isoform 3 of Kin of IRRE-like protein 1	Q96J84-2;Q96J84;Q5W0G0;Q96J84-1;B4DN67;Q96J84-3;Q5W0F9	4	2	2	2.7	85.048	773	0.001378	0.9083	6600400	5466400	1134000
Carbonate dehydratase IX;Carbonic anhydrase 9;Carbonic anhydrase IX;Membrane antigen MN;P54/58N;pMW1;Renal cell carcinoma-associated antigen G250	CA9;G250;MN	Carbonic anhydrase 9	Q16790	2	5	5	11.5	49.697	459	1.2173e-18	0.90873	19708000	8590000	11118000
60S ribosomal protein L22;EBER-associated protein;Epstein-Barr virus small RNA-associated protein;Heparin-binding protein HBp15;Ribosomal protein L22	RPL22	60S ribosomal protein L22	P35268;Q7Z4W8;Q8WYP0;Q9BYF5	1	1	1	10.2	14.787	128	0.0090346	0.91657	3328400	2196400	1132000
Density-enhanced phosphatase 1;HPTP eta;Protein-tyrosine phosphatase receptor type J;Receptor-type tyrosine-protein phosphatase eta;Glomerular epithelial protein 1;Protein tyrosine phosphatase U2;Receptor-type tyrosine-protein phosphatase O;cDNA FLJ77252, highly similar to Homo sapiens protein tyrosine phosphatase, receptor type, O (PTPRO), transcript variant 1, mRNA;Protein tyrosine phosphatase …	DEP1;PTPRJ;GLEPP1;PTPRO;PTPU2;hCG_25166	Receptor-type tyrosine-protein phosphatase eta precursor;Isoform 1 of Receptor-type tyrosine-protein phosphatase O;Isoform 2 of Receptor-type tyrosine-protein phosphatase O;receptor-type tyrosine-protein phosphatase O isoform c precursor;receptor-type tyro	Q12913;Q16827-1;Q16827;A8K169;Q16827-2;Q9UBF0;B4DS16;Q9UBT5	5	2	1	1.3	151.86	1392	0.00037945	0.91847	3452600	2208700	1243900
cDNA FLJ59739, highly similar to Protein transport protein Sec61 subunit alpha isoform 1;Protein transport protein Sec61 subunit alpha isoform 1;cDNA FLJ14517 fis, clone NT2RM1000833, highly similar to Protein transport protein Sec61 subunit alpha isoform 1;cDNA FLJ90225 fis, clone NT2RM1000855, highly similar to Protein transport protein Sec61 subunit alpha isoform 1;Sec61 alpha 1 subunit (S. ce…	SEC61A;SEC61A1;hCG_40108;SEC61A2;hCG_24888	cDNA FLJ59739, highly similar to Protein transport protein Sec61 subunit alpha isoform 1;Isoform 1 of Protein transport protein Sec61 subunit alpha isoform 1;Isoform 1 of Protein transport protein Sec61 subunit alpha isoform 2;protein transport protein Sec	B4DR61;P61619-1;P61619;B3KNF6;Q9H9S3-1;Q9H9S3;B4DX72;E9PDA3;Q9NVQ7;Q9H9S3-2;B3KQ68;Q8TC24;A6NGV2;C9JJV4;A6NIF9;F2Z2C7;A6NK38;C9JXC6	15	5	5	9.1	52.949	482	8.5213e-12	0.91888	66776000	32984000	33791000
Putative uncharacterized protein ENSP00000346598;37 kDa laminin receptor precursor;37/67 kDa laminin receptor;40S ribosomal protein SA;67 kDa laminin receptor;Colon carcinoma laminin-binding protein;Laminin receptor 1;Laminin-binding protein precursor p40;Multidrug resistance-associated protein MGr1-Ag;NEM/1CHD4;Putative uncharacterized protein RPSA;Laminin receptor-like protein LAMRL5	LAMBR;LAMR1;RPSA;LAMR1P15	33 kDa protein;Uncharacterized protein;40S ribosomal protein SA;Similar to Potential laminin-binding protein;Uncharacterized protein;Laminin receptor-like protein LAMRL5	A6NE09;P08865;C9J9K3;Q96RS2	6	3	3	10.7	33.313	300	6.779e-16	0.9216	19255000	9053700	10201000
MHC class I antigen;Major histocompatibility complex, class I, C;MHC classI antigen;HLA-Cw*0602;MHC class I protein HLA-C heavy chain;HLA-C major histocompatibility complex class I antigen;Leukocyte antigen Cw*0707;MHC molecule;MHC class I HLA-C allele;MHC class II antigen;Leukocyte antigen-C alpha chain;HLA class I histocompatibility antigen, Cw-6 alpha chain;MHC class I antigen Cw*6;HLA class I…	HLA-Cw;HLA-C;DADB-104B20.5-007;HLA-Cw*0707;HLA;HLA C*;MHC class I;HLA-Cw*15P;DADB-104B20.5-003;HLAC;DADB-104B20.5-001;DADB-104B20.5-004;DADB-104B20.5-002;XXbac-BCX101P6.2-004;XXbac-BPG248L24.3-004;XXbac-BCX101P6.2-003;XXbac-BPG248L24.3-002;XXbac-BCX101P6.2-002;XXbac-BPG248L24.3-001;XXbac-BCX101P6.2-001;Cw;XXbac-BCX101P6.2-007;XXbac-BPG248L24.3-007;HLA-Cw*07;HLAH;HLA-H	Uncharacterized protein;Major histocompatibility complex, class I, C;class I histocompatibility antigen, Gogo-B*0103 alpha chain-like isoform 3;HLA class I histocompatibility antigen, Cw-6 alpha chain;class I histocompatibility antigen, Gogo-B*0103 alpha c	A0S6X3;A1DZT7;A2BCW9;A9YQ95;B0UY16;B1PL05;B2Z3W4;B3GMV4;B3IYE5;B5AFW6;B5ATV0;B5TRS5;B6V6K3;C0KJW0;C0KJW6;C0KJX5;C0KJY6;C0KJY7;C0KJY8;C0M126;C1K9J3;C5IZU3;C5IZU7;C5IZV4;C5IZV6;C5IZW1;C5IZW3;C5IZX6;C5IZY3;C5J001;C5J004;C6JSX8;C6JSY0;C6JSY4;C6JSZ2;C6JSZ5;C6K4K8;C6K4M0;C6K4M8;C6K4P0;C6K4Q7;C7C4Z8;C7FDU5;C7FDU6;C7FDV9;C7FGZ4;C8CHA3;C8CHA4;C8CHB0;C9E1H7;C9E1H8;C9E1H9;C9E1I7;C9E1I8;C9E859;C9E863;C9WER3;…	36	14	0	39.4	43.901	396	0	0.92223	8305400	3780900	4524500
CapZ alpha-1;F-actin-capping protein subunit alpha-1;cDNA FLJ75422, highly similar to Homo sapiens capping protein (actin filament) muscle Z-line, alpha 1, mRNA	CAPZA1	F-actin-capping protein subunit alpha-1	P52907;A8K0T9	1	3	2	14.3	32.922	286	2.1705e-41	0.92405	19815000	13351000	6464100
Sodium/potassium-dependent ATPase subunit beta-1;Sodium/potassium-transporting ATPase subunit beta-1;ATPase, Na+/K+ transporting, beta 1 polypeptide, isoform CRA_a;cDNA FLJ76773, highly similar to Homo sapiens ATPase, Na+/K+ transporting, beta 1 polypeptide (ATP1B1), transcript variant 1, mRNA;Na,K-ATPase beta 1 subunit;Putative uncharacterized protein ATP1B1;ATP1B1 protein;cDNA, FLJ78942, highly…	ATP1B;ATP1B1;hCG_37798	Isoform 1 of Sodium/potassium-transporting ATPase subunit beta-1;Isoform 2 of Sodium/potassium-transporting ATPase subunit beta-1;cDNA FLJ51474, highly similar to Sodium/potassium-transporting ATPase subunit beta-1	P05026-1;P05026;A3KLL5;A6NGH2;Q6LEU2;P05026-2;B7Z9S8;Q58I20;B4DJG0	3	5	5	21.5	35.061	303	2.1059e-52	0.92555	51274000	21821000	29453000
Myeloid-associated differentiation marker;Protein SB135;cDNA FLJ53753, highly similar to Myeloid-associated differentiation marker;Putative uncharacterized protein MYADM	MYADM;UNQ553/PRO1110	Myeloid-associated differentiation marker;Uncharacterized protein;Uncharacterized protein;Uncharacterized protein;Uncharacterized protein;Uncharacterized protein	Q96S97;B4DG42;E9PBN6;C9JC07;C9J5M0;C9JZL8;C9JJV6	6	1	1	3.1	35.273	322	0.00045244	0.92567	5210600	2447600	2762900
CUB and sushi domain-containing protein 3;CUB and sushi multiple domains protein 3;CSMD3 protein;Putative uncharacterized protein CSMD3	CSMD3;KIAA1894	>IPI:IPI00377041.1|SWISS-PROT:Q7Z407-1|ENSEMBL:ENSP00000297405|REFSEQ:NP_937756|VEGA:OTTHUMP00000211322 Tax_Id=9606 Gene_Symbol=CSMD3 Isoform 1 of CUB and sushi domain-containing protein 3;>IPI:IPI00377042.1|SWISS-PROT:Q7Z407-2|ENSEMBL:ENSP00000345799|REFS	Q7Z407-1;Q7Z407;Q7Z407-2;Q7Z407-4;E7EVY5;Q7Z407-3;A5D6Y2;C9JR29	4	1	1	0.2	406	3707	0.014109	0.92777	4207300	1763600	2443700
Contactin-1;Glycoprotein gp135;Neural cell surface protein F3	CNTN1	Isoform 1 of Contactin-1;Isoform 2 of Contactin-1	Q12860-1;Q12860;Q12860-2	2	2	2	2	113.32	1018	0.010216	0.92997	5187900	2151000	3036900
Sodium-coupled neutral amino acid transporter 5;Solute carrier family 38 member 5;System N transporter 2;Putative uncharacterized protein SLC38A5	JM24;PP7194;SLC38A5;SN2;SNAT5	Isoform 1 of Sodium-coupled neutral amino acid transporter 5;Isoform 2 of Sodium-coupled neutral amino acid transporter 5;Uncharacterized protein;Uncharacterized protein;Uncharacterized protein;Uncharacterized protein;Uncharacterized protein	Q8WUX1-1;Q8WUX1;Q8WUX1-2;C9JNK4;C9JWG4;C9JHH7;C9JMY2;C9JJU1	7	3	3	6.6	51.457	472	2.5979e-07	0.93306	18273000	5935600	12337000
Emerin;EMD protein;Emerin (Emery-Dreifuss muscular dystrophy), isoform CRA_a;Emerin (Emery-Dreifuss muscular dystrophy), isoform CRA_b	EDMD;EMD;STA;hCG_41343;XX-FW88778H2.1-001;XX-FW88778H2.1-010	Emerin;Emerin (Emery-Dreifuss muscular dystrophy), isoform CRA_b	P50402;Q6FI02;Q5HY57	2	3	3	12.6	28.994	254	1.7707e-05	0.93381	10300000	3441500	6858600
Atrial natriuretic peptide receptor 1;Atrial natriuretic peptide receptor type A;Guanylate cyclase A;Guanylate cyclase;Natriuretic peptide A type receptor	ANPRA;NPR1	Atrial natriuretic peptide receptor 1;61 kDa protein	P16066;B4DU06;B7Z4Y7;Q8IXF8	3	5	5	4.5	118.92	1061	1.9812e-13	0.93803	25070000	20460000	4610000
Basic fibroblast growth factor;Heparin-binding growth factor 2	FGF2;FGFB	Isoform 1 of Heparin-binding growth factor 2;Isoform 2 of Heparin-binding growth factor 2;Isoform 4 of Heparin-binding growth factor 2;Isoform 3 of Heparin-binding growth factor 2	P09038-4;P09038;P09038-1;P09038-3;P09038-2;D9ZGF5	4	2	2	6.9	30.77	288	0.022055	0.93942	2080800	1215200	865630
Protein LUMA;Transmembrane protein 43;FLJ00144 protein	TMEM43;UNQ2564/PRO6244;FLJ00144	Transmembrane protein 43;FLJ00144 protein (Fragment)	Q9BTV4;Q8TEP9	2	4	4	9.5	44.875	400	1.6339e-08	0.94108	11111000	5781600	5329900
Glucose-6-phosphate 1-dehydrogenase;Glucose-6-phosphate dehydrogenase;Glucose-6-phosphate dehydrogenase variant	G6PD	Isoform Long of Glucose-6-phosphate 1-dehydrogenase;Isoform 3 of Glucose-6-phosphate 1-dehydrogenase;Isoform Short of Glucose-6-phosphate 1-dehydrogenase;Glucose-6-phosphate 1-dehydrogenase;Glucose-6-phosphate 1-dehydrogenase;Glucose-6-phosphate 1-dehydrog	P11413-2;P11413;P11413-3;A8K8D9;P11413-1;Q0PHS4;Q2Q9B7;Q2Q9H2;Q2VF42;B4DYA7;E7EUI8;E9PDV8;E7EM57;Q0PHS1;A2IBT6;A7IZZ3;B6ZHS6;E9PD92;Q0PHS2;Q0PHS3;Q0PHS5;Q0PHS6	6	11	11	18	63.826	561	7.1403e-50	0.94214	63247000	37277000	25970000
Natural killer cell-enhancing factor A;Peroxiredoxin-1;Proliferation-associated gene protein;Thioredoxin peroxidase 2;Thioredoxin-dependent peroxide reductase 2;cDNA, FLJ92164, highly similar to Homo sapiens peroxiredoxin 1 (PRDX1), mRNA	PAGA;PAGB;PRDX1;TDPX2	Peroxiredoxin-1;19 kDa protein;11 kDa protein	Q06830;B2R4P2	3	14	11	59.8	22.11	199	6.5664e-146	0.94702	8946300000	4646900000	4299400000
26S protease regulatory subunit 7;26S proteasome AAA-ATPase subunit RPT1;Proteasome 26S subunit ATPase 2;Protein MSS1;cDNA FLJ52010, highly similar to 26S protease regulatory subunit 7;Putative uncharacterized protein PSMC2	MSS1;PSMC2	26S protease regulatory subunit 7;26S protease regulatory subunit 7 2	P35998;B7Z571;Q75L23;C9JLS9	2	2	2	4.8	48.633	433	0.00073261	0.94837	1840400	970000	870400
ADP-ribosylation factor-like protein 6-interacting protein 1;cDNA FLJ76399, highly similar to Homo sapiens ADP-ribosylation factor-like 6 interacting protein (ARL6IP), mRNA;cDNA FLJ51781, highly similar to ARL-6-interacting protein 1;cDNA FLJ50719, highly similar to ARL-6-interacting protein 1;cDNA FLJ50699, moderately similar to ARL-6-interacting protein 1	ARL6IP;ARL6IP1;KIAA0069	ADP-ribosylation factor-like protein 6-interacting protein 1;20 kDa protein;18 kDa protein;cDNA FLJ50699, moderately similar to ARL-6-interacting protein 1	Q15041;A8K522;B7Z6R9;B7Z791;B7Z6S5	4	1	1	3.9	23.362	203	0.016787	0.94875	4745200	2930700	1814500
15-hydroxyprostaglandin dehydrogenase [NADP+];Carbonyl reductase [NADPH] 1;NADPH-dependent carbonyl reductase 1;Prostaglandin 9-ketoreductase;Prostaglandin-E(2) 9-reductase	CBR;CBR1;CRN	Carbonyl reductase [NADPH] 1	P16152	5	3	3	9.7	30.375	277	2.189e-08	0.9497	5265100	3247800	2017300
Complex III subunit 8;Complex III subunit VIII;Cytochrome b-c1 complex subunit 8;Ubiquinol-cytochrome c reductase complex 9.5 kDa protein;Ubiquinol-cytochrome c reductase complex ubiquinone-binding protein QP-C	UQCRQ	Cytochrome b-c1 complex subunit 8	O14949	1	2	2	12.2	9.9062	82	3.9771e-05	0.95018	4089100	1872800	2216300
Porcine endogenous retrovirus A receptor 1;Protein GPR172A;cDNA FLJ51448, highly similar to Porcine endogenous retrovirus A receptor 1;Putative G-protein coupled receptor	GPR172A;PAR1;GPCR	Riboflavin transporter 3;Putative G-protein coupled receptor;36 kDa protein;Uncharacterized protein	Q9HAB3;B4E1F8;Q8TDT0;E9PKE4	4	1	1	1.8	45.777	445	0.00068909	0.95396	3398400	1408100	1990300
Ancient conserved domain-containing protein 3;Cyclin-M3;Metal transporter CNNM3	ACDP3;CNNM3	Isoform 1 of Metal transporter CNNM3;Isoform 3 of Metal transporter CNNM3;Isoform 2 of Metal transporter CNNM3	Q8NE01-1;Q8NE01;Q8NE01-3;Q8NE01-2	4	5	5	6.6	76.118	707	3.6797e-06	0.95591	11846000	6778700	5066900
Dual specificity mitogen-activated protein kinase kinase 2;ERK activator kinase 2;MAPK/ERK kinase 2;Putative uncharacterized protein DKFZp686L02273;cDNA FLJ35806 fis, clone TESTI2005987, highly similar to Dual specificity mitogen-activated protein kinase kinase 2 (EC 2.7.12.2);Mitogen-activated protein kinase kinase 2, isoform CRA_d	MAP2K2;MEK2;MKK2;PRKMK2;DKFZp686L02273;hCG_23544	Dual specificity mitogen-activated protein kinase kinase 2;Similar to Dual specificity mitogen-activated protein kinase kinase 2;cDNA FLJ35806 fis, clone TESTI2005987, highly similar to Dual specificity mitogen-activated protein kinase kinase 2	P36507;Q7Z370;B3KS97	3	8	6	18.2	44.424	400	1.9925e-48	0.95813	24229000	9669000	14560000
Protein transport protein Sec61 subunit beta;Protein translocation complex beta variant	SEC61B	Protein transport protein Sec61 subunit beta	P60468;Q53FA5	1	3	3	37.5	9.9743	96	3.8873e-11	0.95828	28288000	17219000	11070000
CD97 antigen;CD97 antigen subunit alpha;CD97 antigen subunit beta;Leukocyte antigen CD97;cDNA FLJ54117, highly similar to CD97 antigen;cDNA FLJ39945 fis, clone SPLEN2023977, highly similar to Homo sapiens CD97 antigen (CD97), transcript variant 2, mRNA;cDNA FLJ53287, highly similar to CD97 antigen	CD97	Isoform 1 of CD97 antigen;Isoform 3 of CD97 antigen;87 kDa protein;cDNA FLJ54117, highly similar to CD97 antigen;Isoform 2 of CD97 antigen;cDNA FLJ53287, highly similar to CD97 antigen	P48960-1;P48960;P48960-3;B4DTS6;P48960-2;B3KUI0;B4E336	15	9	9	10.5	91.868	835	1.8891e-61	0.95904	68806000	32225000	36581000
Death receptor 4;TNF-related apoptosis-inducing ligand receptor 1;Tumor necrosis factor receptor superfamily member 10A;Tumor necrosis factor receptor superfamily member 10a	APO2;DR4;TNFRSF10A;TRAILR1	Tumor necrosis factor receptor superfamily member 10A	O00220;C1K3N4	1	2	2	3.6	50.089	468	3.5556e-05	0.95933	43050000	19170000	23880000
Elongation factor Tu, mitochondrial;P43	TUFM	elongation factor Tu, mitochondrial precursor	P49411	1	14	14	29.2	49.874	455	3.863e-85	0.9624	155870000	67329000	88536000
18 kDa phosphoprotein;Cofilin, non-muscle isoform;Cofilin-1;cDNA FLJ51435, moderately similar to Cofilin-1	CFL;CFL1	Uncharacterized protein;Cofilin-1;Uncharacterized protein;17 kDa protein;Uncharacterized protein;cDNA FLJ51435, moderately similar to Cofilin-1;Uncharacterized protein	E9PK25;P23528;E9PP50;E9PQB7;B4E112;E9PS23;E9PLJ3	7	6	3	20.6	22.728	204	6.4574e-29	0.96256	177490000	91560000	85926000
CCT-beta;T-complex protein 1 subunit beta;cDNA FLJ75037, highly similar to Homo sapiens chaperonin containing TCP1, subunit 2 (beta) (CCT2),mRNA;cDNA FLJ50480, highly similar to T-complex protein 1 subunit beta;cDNA FLJ52359, highly similar to T-complex protein 1 subunit beta;cDNA, FLJ79296, highly similar to T-complex protein 1 subunit beta;cDNA, FLJ79307, highly similar to T-complex protein 1 s…	99D8.1;CCT2;CCTB;hCG_24460	T-complex protein 1 subunit beta;T-complex protein 1 subunit beta isoform 2;cDNA FLJ50585, highly similar to T-complex protein 1 subunit beta	P78371;A8K402;B5BTY7;B7Z243;B7Z7K4;B7ZAT2;B7Z4R3;Q9H369	3	6	6	12.1	57.488	535	3.772e-13	0.9629	18379000	11691000	6687600
CD9 partner 1;Glu-Trp-Ile EWI motif-containing protein F;Prostaglandin F2 receptor negative regulator;Prostaglandin F2-alpha receptor regulatory protein;Prostaglandin F2-alpha receptor-associated protein;PTGFRN protein	CD9P1;EWIF;FPRP;KIAA1436;PTGFRN	Prostaglandin F2 receptor negative regulator	Q9P2B2;Q4QQP8	1	15	2	16.4	98.555	879	1.9099e-69	0.96593	258140000	102500000	155640000
Bifunctional aminoacyl-tRNA synthetase;Cell proliferation-inducing gene 32 protein;Glutamate--tRNA ligase;Glutamyl-tRNA synthetase;Proline--tRNA ligase;Prolyl-tRNA synthetase;cDNA FLJ58269, highly similar to Bifunctional aminoacyl-tRNA synthetase;cDNA FLJ56021, highly similar to Bifunctional aminoacyl-tRNA synthetase[Includes: Glutamyl-tRNA synthetase (EC 6.1.1.17);EPRS protein	EPRS;GLNS;PARS;PIG32;QARS;QPRS	Bifunctional aminoacyl-tRNA synthetase;cDNA FLJ56021, highly similar to Bifunctional aminoacyl-tRNA synthetase[Includes: Glutamyl-tRNA synthetase (Fragment);EPRS protein (Fragment)	P07814;B4DP50;B4DKX5;E7EMN0;Q3KQZ8	5	12	11	7.9	170.59	1512	1.0277e-26	0.97074	18433000	10901000	7531800
Optic atrophy 3 protein;cDNA FLJ57883, highly similar to Optic atrophy 3 protein	OPA3	Isoform 1 of Optic atrophy 3 protein;cDNA FLJ57883, highly similar to Optic atrophy 3 protein	Q9H6K4-1;Q9H6K4;B4DK77	2	2	2	8.4	19.996	179	0.025591	0.97234	32082000	23502000	8580200
Histone acetyltransferase type B catalytic subunit	HAT1	Isoform A of Histone acetyltransferase type B catalytic subunit;Isoform B of Histone acetyltransferase type B catalytic subunit	O14929-1;O14929;O14929-2	3	4	4	10.7	49.512	419	1.1584e-50	0.97351	13417000	5943100	7474300
17-beta-hydroxysteroid dehydrogenase type 5;3-alpha-HSD type II, brain;3-alpha-hydroxysteroid dehydrogenase type 2;Aldo-keto reductase family 1 member C3;Chlordecone reductase homolog HAKRb;Dihydrodiol dehydrogenase 3;Dihydrodiol dehydrogenase type I;HA1753;Indanol dehydrogenase;Prostaglandin F synthase;Testosterone 17-beta-dehydrogenase 5;Trans-1,2-dihydrobenzene-1,2-diol dehydrogenase;Type II 3…	AKR1C3;DDH1;HSD17B5;KIAA0119;PGFS	Aldo-keto reductase family 1 member C3;cDNA FLJ58390, highly similar to Aldo-keto reductase family 1 member C3homolog	P42330;Q2XPP3;B4DKT3	2	8	1	17.3	36.853	323	1.5086e-22	0.98028	4450300	2187800	2262500
Uncharacterized family 31 glucosidase KIAA1161	KIAA1161	Uncharacterized family 31 glucosidase KIAA1161	Q6NSJ0	2	4	4	5.6	81.086	714	3.2088e-10	0.98892	29069000	6951000	22118000
Plexin-A1;Semaphorin receptor NOV;cDNA FLJ46771 fis, clone TRACH3025828, highly similar to Plexin-A1;cDNA FLJ57256, highly similar to Plexin-A1;cDNA FLJ44113 fis, clone TESTI4046487, highly similar to Mus musculus plexin A1 (Plxna1);Putative uncharacterized protein DKFZp761P19121	NOV;PLXN1;PLXNA1;DKFZp761P19121	Plexin-A1;cDNA FLJ57256, highly similar to Plexin-A1	Q9UIW2;B3KY38;B4DE20;Q6ZTY7;Q9NSM6	6	15	7	7.6	211.06	1896	2.1922e-62	0.98929	20555000	9112900	11442000
DNA-dependent protein kinase catalytic subunit;DNPK1;p460	HYRC;HYRC1;PRKDC	Isoform 1 of DNA-dependent protein kinase catalytic subunit;Isoform 2 of DNA-dependent protein kinase catalytic subunit;DNA-dependent protein kinase catalytic subunit-like	P78527-1;P78527;P78527-2;E7EUY0	4	72	72	16.2	469.08	4128	1.3566e-228	1.001	184280000	65280000	119000000
HCV F-transactivated protein 2;Up-regulated during skeletal muscle growth protein 5	HCVFTP2;PD04912;USMG5	Up-regulated during skeletal muscle growth protein 5	Q96IX5	1	2	2	43.1	6.4575	58	9.1706e-50	1.0014	109280000	80474000	28804000
17-beta-hydroxysteroid dehydrogenase 12;3-ketoacyl-CoA reductase;Estradiol 17-beta-dehydrogenase 12;cDNA FLJ90530 fis, clone NT2RP4002187, highly similar to Homo sapiens hydroxysteroid (17-beta) dehydrogenase 12 (HSD17B12), mRNA;cDNA FLJ61181, highly similar to Homo sapiens hydroxysteroid (17-beta) dehydrogenase 12 (HSD17B12), mRNA;Hydroxysteroid (17-beta) dehydrogenase 12, isoform CRA_a	HSD17B12;hCG_16453	Estradiol 17-beta-dehydrogenase 12;Hydroxysteroid (17-beta) dehydrogenase 12, isoform CRA_a	Q53GQ0;B3KQJ0;B4DWS6;D3DR22	4	3	3	9.3	34.324	312	8.1233e-05	1.0047	8277300	4336700	3940500
cDNA FLJ61254, highly similar to Receptor-type tyrosine-protein phosphatase kappa (EC 3.1.3.48);PTPRK protein;Protein tyrosine phosphatase, receptor type, K;Mutant receptor type protein tyrosine phosphatase K;Receptor-type tyrosine-protein phosphatase kappa;Putative uncharacterized protein DKFZp686C2268;Protein tyrosine phosphatase, receptor type, K variant	PTPRK;RP3-480J14.1-004;PTPK;DKFZp686C2268;RP3-480J14.1-008;RP3-480J14.1-002;RP3-480J14.1-013;RP3-480J14.1-006	Uncharacterized protein;PTPRK protein;Protein tyrosine phosphatase, receptor type, K;receptor-type tyrosine-protein phosphatase kappa isoform a;Isoform 2 of Receptor-type tyrosine-protein phosphatase kappa;Isoform 1 of Receptor-type tyrosine-protein phosph	B4DHC3;E9PGC5;B7ZMG0;Q5TG12;Q86WJ2;B2RTQ8;Q15262-2;Q15262;Q68DT8;Q15262-1;Q5JT32;Q5JT33;Q59EZ1;Q5JRN8;Q5JRZ3	10	4	4	2.8	166.03	1472	6.9449e-09	1.0103	7340100	3464000	3876000
Monocarboxylate transporter 3;Monocarboxylate transporter 4;Solute carrier family 16 member 3;Solute carrier family 16, member 3 variant	MCT3;MCT4;SLC16A3	Monocarboxylate transporter 4	O15427;Q53G91	1	9	9	20	49.469	465	7.8719e-45	1.011	301890000	125970000	175920000
Guanine nucleotide-binding protein G(I)/G(S)/G(O) subunit gamma-12;G-protein gamma-12 subunit variant;cDNA FLJ76584, highly similar to Homo sapiens guanine nucleotide binding protein (G protein), gamma 12 (GNG12), mRNA;G-protein gamma-12 subunit;Guanine nucleotide binding protein (G protein), gamma 12;Guanine nucleotide binding protein (G protein), gamma 12, isoform CRA_a;Putative uncharacterized…	GNG12;DKFZp762E193;hCG_1640926;RP5-975D15.2-001	Guanine nucleotide-binding protein G(I)/G(S)/G(O) subunit gamma-12	Q9UBI6;Q53GD1;Q69YP5	1	2	2	25	8.0061	72	9.6323e-07	1.0115	11740000	6900000	4839700
Cyclin-A/CDK2-associated protein p19;Organ of Corti protein 2;Organ of Corti protein II;p19A;p19skp1;RNA polymerase II elongation factor-like protein;SIII;S-phase kinase-associated protein 1;Transcription elongation factor B	EMC19;OCP2;SKP1;SKP1A;TCEB1L	Uncharacterized protein;Isoform 1 of S-phase kinase-associated protein 1;Isoform 2 of S-phase kinase-associated protein 1;Uncharacterized protein;Uncharacterized protein	E5RJR5;P63208-1;P63208;P63208-2;E7ES24;E7ERH2	8	4	3	20.2	18.72	163	1.0387e-19	1.0133	8959100	5091600	3867400
Eosinophil serine protease 1;Serine protease 21;Testisin	ESP1;PRSS21;TEST1;UNQ266/PRO303	Isoform 1 of Testisin;Isoform 2 of Testisin;Isoform 3 of Testisin	Q9Y6M0-1;Q9Y6M0;Q9Y6M0-2;Q9Y6M0-3	3	1	1	3.5	34.884	314	9.4327e-07	1.0146	6838800	2719200	4119600
eIF-4D;Eukaryotic initiation factor 5A isoform 1;Eukaryotic translation initiation factor 5A-1;Rev-binding factor;Eukaryotic initiation factor 5A isoform 1-like;Eukaryotic translation initiation factor 5A-1-like;Eukaryotic initiation factor 5A isoform 2;Eukaryotic translation initiation factor 5A-2;Putative uncharacterized protein EIF5A2	EIF5A;EIF5AL1;EIF5A2	Isoform 2 of Eukaryotic translation initiation factor 5A-1;Isoform 1 of Eukaryotic translation initiation factor 5A-1;Eukaryotic translation initiation factor 5A-1-like;Eukaryotic translation initiation factor 5A-2;Uncharacterized protein;Uncharacterized p	P63241-2;P63241;P63241-1;Q6IS14;Q9GZV4;C9J4W5;C9J7B5	7	4	4	14.7	20.17	184	0.00077123	1.0151	40147000	10620000	29528000
cDNA FLJ36192 fis, clone TESTI2027450, highly similar to Eukaryotic translation initiation factor 3 subunit 5;HCG1784554, isoform CRA_a;eIF3 p47;eIF-3-epsilon;Eukaryotic translation initiation factor 3 subunit 5;Eukaryotic translation initiation factor 3 subunit F;cDNA FLJ52696, highly similar to Eukaryotic translation initiation factor 3 subunit 5;cDNA FLJ52478, highly similar to Eukaryotic tran…	hCG_1784554;EIF3F;EIF3S5	cDNA FLJ36192 fis, clone TESTI2027450, highly similar to Eukaryotic translation initiation factor 3 subunit 5;Eukaryotic translation initiation factor 3 subunit F;cDNA FLJ52696, highly similar to Eukaryotic translation initiation factor 3 subunit 5;cDNA FL	B3KSH1;E9PQV8;O00303;B4DMT5;B4DEW9	5	2	2	5.4	39.146	372	2.015e-05	1.0162	2568100	1082000	1486100
cDNA FLJ55484, highly similar to ATP-dependent RNA helicase DDX39 (EC 3.6.1.-);56 kDa U2AF65-associated protein;ATP-dependent RNA helicase p47;DEAD box protein UAP56;HLA-B-associated transcript 1 protein;Spliceosome RNA helicase BAT1;ATP-dependent RNA helicase DDX39;DEAD box protein 39;Nuclear RNA helicase URH49;Putative uncharacterized protein DKFZp547B159;HLA-B associated transcript 1;cDNA FLJ5…	BAT1;UAP56;DDX39;DKFZp547B159;DAAP-97M17.4-003;XXbac-BCX270M2.2-006;DADB-26I14.7-006;DAMA-25N12.12-006;DAMA-BMC190B12.8-006;DAQB-72H16.1-006;DASS-161H22.1-006;XXbac-BPG296P20.6-006;hCG_2005638;DAAP-97M17.4-006;hCG_1776331;DASS-161H22.1-017;XXbac-BCX270M2.2-017;DAQB-72H16.1-017;DAMA-25N12.12-017;DADB-26I14.7-017;DAMA-BMC190B12.8-017;DASS-161H22.1-009;DAQB-72H16.1-009;DAMA-25N12.12-009;DADB-26I14.7…	ATP-dependent RNA helicase DDX39A isoform 2;Isoform 2 of Spliceosome RNA helicase DDX39B;Isoform 1 of Spliceosome RNA helicase DDX39B;ATP-dependent RNA helicase DDX39A;HLA-B associated transcript 1;HLA-B associated transcript 1;cDNA FLJ53073, highly simila	B4DX78;Q13838-2;Q13838;Q13838-1;O00148;Q69YT6;B0V2L1;Q5STA0;Q5STU3;B4DP52;E9PP12;B0V2L2;Q8N5M0;A2BF54;A6PWH1;B0S4X2;B0S8C3;B0UZ18;B0UZ99;B1Q2N1;B4DIJ6;A2BF56;B0S4X4;B0S8B3;B0UZ21;B0UZA2;Q59G92;Q5STA2;Q5STU9;A2BF57;A6PWH2;B0S4X3;B0S8B2;B0UZ20;B0UZA1;A2BF55;A6PWH3;B0S8C4;B0UZ19;B0UZA0;Q5RJ65;B0V2L3;A2AB30;A2BF52;A6PWG9;B0S4X9;B0S8B9;B0UZ14;B0UZB3;B0V2K9;B0V2L6;B0V2L5;B0V2L4	28	4	4	7	53.768	470	3.6013e-08	1.0186	12325000	5685700	6639500
Putative uncharacterized protein SLC38A1;Amino acid transporter A1;N-system amino acid transporter 2;Sodium-coupled neutral amino acid transporter 1;Solute carrier family 38 member 1;System A amino acid transporter 1;System N amino acid transporter 1;cDNA FLJ90316 fis, clone NT2RP2001495, weakly similar to Human transporter protein (g17)	SLC38A1;ATA1;NAT2;SAT1;SNAT1	Uncharacterized protein;Sodium-coupled neutral amino acid transporter 1	B5MEC5;Q9H2H9;Q8NCD8	2	3	3	5.1	58.767	526	1.1437e-08	1.0202	21155000	9617600	11537000
Plexin-A2;Semaphorin receptor OCT	KIAA0463;OCT;PLXN2;PLXNA2;UNQ209/PRO235	Similar to Plexin A2	O75051-1;O75051	2	9	4	4.6	212.65	1909	1.137e-13	1.0225	3035900	1728600	1307300
Mitotic checkpoint protein BUB3;cDNA FLJ57899, highly similar to Mitotic checkpoint protein BUB3	BUB3	Isoform 1 of Mitotic checkpoint protein BUB3;Isoform 2 of Mitotic checkpoint protein BUB3;32 kDa protein;cDNA FLJ57899, highly similar to Mitotic checkpoint protein BUB3	O43684-1;O43684;O43684-2;B4DDM6	4	5	5	15.5	37.154	328	3.6623e-12	1.0232	10086000	5721200	4364800
Exocyst complex component 3;Exocyst complex component Sec6;cDNA, FLJ96859;Putative uncharacterized protein DKFZp762K123;Exocyst complex component 3, isoform CRA_a	EXOC3;SEC6;SEC6L1;DKFZp762K123;hCG_17068	Isoform 1 of Exocyst complex component 3;exocyst complex component 3;Isoform 2 of Exocyst complex component 3	O60645-1;O60645;B2RE06;Q69YP2;Q6P2E8;O60645-2;D6RB59	5	3	3	4.1	86.844	756	0.0025232	1.0287	2369600	1409600	959930
HLA class I histocompatibility antigen, B-15 alpha chain;MHC class I antigen B*15;HLA class I histocompatibility antigen, B-35 alpha chain;MHC class I antigen B*35;MHC class I antigen;MHC class I;MHC Class I antigen;MHC class I anitgen;HLA-B55;HLA-B protein;HLA-B*13 protein;MHC class I antigen HLA-B;MHC class I HLA-B antigen;MHC class I antigen B*5108;HLA-B35;MHC class I antigen HLA-B35;MHC class…	HLAB;HLA-B;HLA;HLA-B*58;HLA-B*13;B*35;B*15;B-3501;HLA-Bw62.3;HLA-B*51IM;HLA-B18;HLA-B*3512;HLA-B*35JAC;HLA-B51;HLA-B35;B-1510;HLA-B*5101 variant;HLA-B*1522;HLA-B*1513;HLA-A;HLA-Bw62.5;HLA-Bw62.1;HLA-Bw62.4;HLA-B52;DKFZp686N10220;HLA-B*;HLA-B*35SRE;HLA-B*3531;HLA-B15;HLA-B*35KM;HLA-B*5501 variant;HLA B;HLA-B57;DAMA-387C9.2-001;DAMC-153L10.1-003;Cw*03;HLA-B*15MD;HLA-B*15UL;HLA-B*15IL;HLA-B*5603;HLA…	HLA class I histocompatibility antigen, B-15 alpha chain;HLA class I histocompatibility antigen, B-46 alpha chain;HLA class I histocompatibility antigen, B-53 alpha chain;HLA class I histocompatibility antigen, B-57 alpha chain;HLA class I histocompatibili	P30464;P30685;A0FKC4;A0JCS1;A0JKD1;A0MNW2;A0MSS3;A0PCH6;A1DZT9;A1E2C1;A1E2R4;A1IVL5;A1KWR0;A1XAM5;A1YRJ1;A1Z288;A1Z291;A2IAT8;A2Q118;A2Q119;A2RQE1;A2TDT1;A2TEL9;A2TEM1;A2TJS4;A2VBX9;A2VBZ9;A3F720;A3FG53;A3FG54;A3FG55;A3FG56;A3FG57;A3FG64;A3FG65;A3FP42;A3KLI7;A3RLM7;A4FRG1;A4FSH4;A4GX62;A4URH0;A4USG3;A4ZVL4;A4ZW43;A4ZX99;A5HKN5;A5HKN6;A5HM76;A5JSG4;A5JSG7;A5PI54;A6BML9;A6H567;A6H579;A6MWD9;A6N5Y9;…	18	12	0	32.6	40.388	362	2.8524e-221	1.0289	735140000	347860000	387280000
Cell cycle progression restoration gene 3 protein;DnaJ homolog subfamily A member 2;Dnj3;HIRA-interacting protein 4;Renal carcinoma antigen NY-REN-14	CPR3;DNAJA2;HIRIP4	DnaJ homolog subfamily A member 2	O60884	1	2	2	4.4	45.745	412	1.1601e-07	1.0306	4193200	1866100	2327200
Acyl-protein thioesterase 2;Lysophospholipase II	APT2;LYPLA2;RP5-886K2.5-010;RP5-886K2.5-008;RP5-886K2.5-005;RP5-886K2.5-007	Acyl-protein thioesterase 2;Uncharacterized protein;Lysophospholipase II;Lysophospholipase II;Lysophospholipase II	O95372;E9PH41;Q5QPQ0;Q5QPQ2;Q5QPQ3;Q5QPQ1	8	4	4	13.4	24.737	231	1.5154e-06	1.0331	34888000	17289000	17599000
4Ig-B7-H3;B7 homolog 3;CD276 antigen;Costimulatory molecule;cDNA FLJ78639;cDNA FLJ78024;cDNA FLJ61301, highly similar to CD276 antigen	B7H3;CD276;PSEC0249;UNQ309/PRO352	Isoform 1 of CD276 antigen;Isoform 4 of CD276 antigen;42 kDa protein;Isoform 2 of CD276 antigen;Isoform 3 of CD276 antigen	Q5ZPR3-1;Q5ZPR3;A8K6Q6;A8K9J6;B4DK26;Q5ZPR3-4;Q5ZPR3-2;Q5ZPR3-3	5	2	2	4.7	57.235	534	0.0034444	1.0344	32758000	11723000	21035000
GCN1-like protein 1;Translational activator GCN1;cDNA FLJ54481, highly similar to GCN1-like protein 1	GCN1L1;KIAA0219	Translational activator GCN1	Q92616;B4DM32;E1NZA1	2	46	46	17	292.75	2671	2.0607e-133	1.0365	85855000	36744000	49111000
Medium tumor antigen-associated 61 kDa protein;PP2A subunit A isoform PR65-alpha;PP2A subunit A isoform R1-alpha;Serine/threonine-protein phosphatase 2A 65 kDa regulatory subunit A alpha isoform;cDNA FLJ77680, highly similar to Homo sapiens protein phosphatase 2 (formerly 2A), regulatory subunit A (PR 65), alpha isoform (PPP2R1A), mRNA;cDNA FLJ78455, highly similar to Homo sapiens protein phospha…	PPP2R1A;hCG_19686	Serine/threonine-protein phosphatase 2A 65 kDa regulatory subunit A alpha isoform;cDNA FLJ53296, highly similar to Serine/threonine-protein phosphatase 2A 65 kDa regulatory subunit A alpha isoform;cDNA FLJ56133, highly similar to Serine/threonine-protein p	P30153;A8K3H8;A8K7B7;B4DDF7;B4DQY1;B3KQV6;B4DE69;E9PH38;Q8NB89	15	9	9	13.9	65.308	589	5.9876e-56	1.0406	156990000	109660000	47334000
Epidermal growth factor receptor;Proto-oncogene c-ErbB-1;Receptor tyrosine-protein kinase erbB-1;cDNA FLJ76780, highly similar to Homo sapiens epidermal growth factor receptor (erythroblastic leukemia viral (v-erb-b) oncogene homolog, avian) (EGFR), transcript variant 1, mRNA;Cell proliferation-inducing protein 61;cDNA FLJ55514, highly similar to Epidermal growth factor receptor (EC 2.7.10.1);Cel…	EGFR;ERBB1	Isoform 1 of Epidermal growth factor receptor;Cell growth inhibiting protein 40;EGFR protein;Isoform 3 of Epidermal growth factor receptor;72 kDa protein;Isoform 4 of Epidermal growth factor receptor	P00533-1;P00533;A8K2T7;A9CB80;B7Z2I3;E7BSV0;F2YGG7;Q2TTR7;Q504U8;P00533-3;Q68GS6;Q9H3C8;P00533-4	15	20	18	16.7	134.28	1210	7.6763e-162	1.0457	228230000	83657000	144570000
Erythroid-potentiating activity;Fibroblast collagenase inhibitor;Metalloproteinase inhibitor 1;Tissue inhibitor of metalloproteinases 1;cDNA FLJ90373 fis, clone NT2RP2004606, highly similar to Metalloproteinase inhibitor 1;Tissue inhibitor of metalloproteinase 1;cDNA, FLJ92204, Homo sapiens tissue inhibitor of metalloproteinase 1 (erythroidpotentiating activity, collagenase inhibitor) (TIMP1), mR…	CLGI;TIMP;TIMP1;hCG_29141;RP1-230G1.3-001;RP1-230G1.3-003;RP1-230G1.3-002;RP1-230G1.3-004	Metalloproteinase inhibitor 1;TIMP metallopeptidase inhibitor 1;TIMP metallopeptidase inhibitor 1;TIMP metallopeptidase inhibitor 1	P01033;B3KQF4;Q58P21;Q6FGX5;Q5H9A7;Q5H9B5;Q5H9B4	4	2	2	10.1	23.171	207	7.1271e-10	1.052	7554900	1730100	5824800
cDNA FLJ10554 fis, clone NT2RP2002385, highly similar to Synaptic glycoprotein SC2;cDNA FLJ36768 fis, clone ADIPS1000064, highly similar to Synaptic glycoprotein SC2;Synaptic glycoprotein SC2;Trans-2,3-enoyl-CoA reductase;cDNA FLJ58248, highly similar to Synaptic glycoprotein SC2	GPSN2;SC2;TECR	cDNA FLJ36768 fis, clone ADIPS1000064, highly similar to Synaptic glycoprotein SC2;Isoform 1 of Trans-2,3-enoyl-CoA reductase	B3KM97;B3KSQ1;Q9NZ01-1;Q9NZ01;B4DR74	4	3	3	7.7	37.467	323	1.7676e-05	1.052	14543000	6159000	8383600
300 kDa mannose 6-phosphate receptor;Cation-independent mannose-6-phosphate receptor;Insulin-like growth factor 2 receptor;Insulin-like growth factor II receptor;M6P/IGF2 receptor;Insulin-like growth factor type 2 receptor;Insulin-like growth factor type II receptor;Insulin-like growth factor 2 receptor variant	IGF2R;MPRI;igf2R	Cation-independent mannose-6-phosphate receptor	P11717;A0N9R6;A0N9R7;E7ENI8;Q59EZ3	3	16	16	6.2	274.37	2491	9.1384e-44	1.0523	18350000	9787300	8563100
Activated protein C receptor;Endothelial cell protein C receptor;Endothelial protein C receptor	EPCR;PROCR	Endothelial protein C receptor precursor	Q9UNN8	1	4	4	15.6	30.715	275	7.6566e-17	1.0547	88597000	40933000	47664000
Pantophysin;Synaptophysin-like protein 1;Synaptophysin-like 1, isoform CRA_a;Synaptophysin-like protein;cDNA FLJ75789, highly similar to Homo sapiens synaptophysin-like 1 (SYPL1), transcript variant 1, mRNA;Synaptophysin-like 1, isoform CRA_b;Putative uncharacterized protein SYPL1	SYPL;SYPL1;hCG_16932;tcag7.98	Isoform 1 of Synaptophysin-like protein 1;Isoform 2 of Synaptophysin-like protein 1;Uncharacterized protein	Q16563-1;Q16563;A4D0R1;A8K865;Q16563-2;A4D0R2;C9JYN0	3	1	1	4.2	28.565	259	3.3873e-17	1.0663	110590000	5416200	105180000
46 kDa mannose 6-phosphate receptor;Cation-dependent mannose-6-phosphate receptor;cDNA, FLJ93084, highly similar to Homo sapiens mannose-6-phosphate receptor (cation dependent) (M6PR), mRNA;Cation-dependent mannose-6-phosphate receptor variant;Similar to mannose-6-phosphate receptor (Cation dependent);M6PR protein	M6PR;MPR46;MPRD	Cation-dependent mannose-6-phosphate receptor;M6PR protein;Protein	P20645;B2R6S2;Q53GY9;Q96AH2;Q6I9U3	6	3	3	11.2	30.993	277	6.8001e-08	1.0669	15608000	7015400	8592100
Integral nuclear envelope inner membrane protein;Lamin-B receptor;LMN2R;Putative uncharacterized protein LBR	LBR	Lamin-B receptor;Uncharacterized protein	Q14739;C9JXK0	2	2	2	3.1	70.702	615	0.00055086	1.067	4254600	2562000	1692600
ATP-dependent RNA helicase eIF4A-1;Eukaryotic initiation factor 4A-I;cDNA FLJ78614, highly similar to Homo sapiens eukaryotic translation initiation factor 4A, isoform 1 (EIF4A1), mRNA;cDNA FLJ78244, highly similar to Homo sapiens eukaryotic translation initiation factor 4A, isoform 1 (EIF4A1), mRNA;cDNA FLJ58596, highly similar to Eukaryotic initiation factor 4A-I (EC 3.6.1.-);Eukaryotic initiat…	DDX2A;EIF4A;EIF4A1;DDX2B;EIF4A2;EIF4F	Eukaryotic initiation factor 4A-I;eukaryotic initiation factor 4A-I isoform 2;Isoform 2 of Eukaryotic initiation factor 4A-II;Isoform 1 of Eukaryotic initiation factor 4A-II;Uncharacterized protein	P60842;A8K088;A8K7F6;B4DNH2;Q9NZR9;B4E047;Q14240-2;Q14240;Q14240-1;E7EQG2	11	8	8	20	46.153	406	2.499e-42	1.068	57942000	23956000	33986000
Fibronectin receptor subunit beta;Integrin beta-1;VLA-4 subunit beta	FNRB;ITGB1;MDF2;MSK12	Isoform Beta-1A of Integrin beta-1;Isoform Beta-1C of Integrin beta-1;Isoform Beta-1C-2 of Integrin beta-1;Isoform Beta-1D of Integrin beta-1;Isoform Beta-1B of Integrin beta-1	P05556-1;P05556;P05556-3;P05556-4;P05556-5;P05556-2	18	20	20	22.1	88.414	798	2.4126e-132	1.0696	1240300000	443420000	796880000
Mitochondrial import inner membrane translocase subunit TIM50;Translocase of inner mitochondrial membrane 50 homolog (S. cerevisiae);TIM50L;TIMM50 protein	PRO1512;TIM50;TIMM50	Isoform 2 of Mitochondrial import inner membrane translocase subunit TIM50;Isoform 1 of Mitochondrial import inner membrane translocase subunit TIM50;TIMM50 protein	Q3ZCQ8-2;Q3ZCQ8;Q0VAB1;Q3ZCQ8-1;Q330K1	3	4	4	9.2	50.464	456	1.4894e-38	1.0779	10044000	4501500	5542200
1-acylglycerophosphocholine O-acyltransferase;1-alkylglycerophosphocholine O-acetyltransferase;Acetyl-CoA:lyso-platelet-activating factor acetyltransferase;Acyltransferase-like 2;Lysophosphatidylcholine acyltransferase 1;Phosphonoformate immuno-associated protein 3;Acyltransferase like 2, isoform CRA_a	AYTL2;LPCAT1;PFAAP3;hCG_1789470	Lysophosphatidylcholine acyltransferase 1	Q8NF37;D3DTC2	1	3	3	6.2	59.151	534	2.238e-12	1.0791	9648100	5536900	4111200
Lipid phosphate phosphohydrolase 2;PAP2-gamma;Phosphatidate phosphohydrolase type 2c;Phosphatidic acid phosphatase 2c;Phosphatidic acid phosphatase type 2C isoform 3 variant	LPP2;PPAP2C	Isoform 2 of Lipid phosphate phosphohydrolase 2;Isoform 1 of Lipid phosphate phosphohydrolase 2;lipid phosphate phosphohydrolase 2 isoform 2;Phosphatidic acid phosphatase type 2C isoform 3 variant (Fragment)	O43688-2;O43688;O43688-1;E9PAY8;Q59EW5	4	1	1	3.2	34.392	309	0.0045731	1.0793	8546200	1772200	6774000
Calcyclin;Growth factor-inducible protein 2A9;MLN 4;Prolactin receptor-associated protein;Protein S100-A6;S100 calcium-binding protein A6;cDNA, FLJ92369, highly similar to Homo sapiens S100 calcium binding protein A6 (calcyclin) (S100A6),mRNA	CACY;S100A6	Protein S100-A6	P06703;B2R577	1	4	4	28.9	10.18	90	8.8999e-12	1.0809	869300000	438410000	430890000
Pyruvate dehydrogenase E1 component subunit beta, mitochondrial;cDNA FLJ52988, highly similar to Pyruvate dehydrogenase E1 component subunit beta, mitochondrial (EC 1.2.4.1);Putative uncharacterized protein PDHB	PDHB;PHE1B	Isoform 1 of Pyruvate dehydrogenase E1 component subunit beta, mitochondrial;pyruvate dehydrogenase E1 component subunit beta, mitochondrial isoform 2 precursor;Isoform 2 of Pyruvate dehydrogenase E1 component subunit beta, mitochondrial;Uncharacterized pr	P11177-1;P11177;B4DDD7;P11177-2;C9J634	5	2	2	7.5	39.233	359	5.4691e-07	1.083	8332800	5580700	2752200
cDNA FLJ54600, highly similar to Ataxin-10;Putative uncharacterized protein DKFZp434I1726;Ataxin-10;Brain protein E46 homolog;Spinocerebellar ataxia type 10 protein;HUMEEP	DKFZp434I1726;ATXN10;SCA10	ataxin-10 isoform 2;Uncharacterized protein;HUMEEP	B4DG05;Q9NTC6;Q9UBB4;E7ESH8;Q7Z524	6	7	7	21.7	46.286	411	1.1695e-97	1.084	65418000	48528000	16890000
Amino acid transport system xc-;Calcium channel blocker resistance protein CCBR1;Cystine/glutamate transporter;Solute carrier family 7 member 11;xCT;cDNA FLJ78174, highly similar to Homo sapiens cystine/glutamate transporter (XCT gene);cDNA, FLJ95753, Homo sapiens solute carrier family 7, (cationic amino acidtransporter, y+ system) member 11 (SLC7A11), mRNA;HCG19504, isoform CRA_a;Putative unchar…	SLC7A11;hCG_19504;hxCT;xCT	Cystine/glutamate transporter	Q9UPY5;A8K2U4;Q4W5A5;Q9BYH2;Q9P1X0	1	4	4	6.8	55.422	501	8.4811e-16	1.0848	33407000	16216000	17191000
CLIP-associating protein 1;Cytoplasmic linker-associated protein 1;Multiple asters homolog 1;Protein Orbit homolog 1;cDNA FLJ53242, highly similar to CLIP-associating protein 1;CLASP1 protein;cDNA FLJ61355, highly similar to CLIP-associating protein 1;Putative uncharacterized protein CLASP1;cDNA FLJ55778, highly similar to CLIP-associating protein 1;cDNA FLJ55338, highly similar to CLIP-associati…	CLASP1;KIAA0622;MAST1;DKFZp686D1968	Isoform 1 of CLIP-associating protein 1;Isoform 3 of CLIP-associating protein 1;CLIP-associating protein 1 isoform 2;Isoform 2 of CLIP-associating protein 1;Uncharacterized protein;cDNA FLJ55778, highly similar to CLIP-associating protein 1;cDNA FLJ55338,	Q7Z460-1;Q7Z460;Q7Z460-3;B7Z7Q8;A2RU21;Q7Z460-2;B7Z5R7;B7ZLX3;E7EUA5;C9JW97;B7Z2P0;B7Z4E5;B7Z4J0;B7Z7C4;Q68D09	14	8	6	5.6	169.45	1538	1.2249e-16	1.0878	6987000	3133700	3853400
Catenin gamma;Desmoplakin III;Desmoplakin-3;Junction plakoglobin;Plakoglobin	CTNNG;DP3;JUP	Junction plakoglobin	P14923;Q7KZ86	1	18	10	25	81.744	745	1.444e-96	1.0883	248690000	83381000	165310000
Butyrophilin subfamily 2 member A1;Putative uncharacterized protein BTN2A1;Butyrophilin, subfamily 2, member A1 isoform 2 variant;Butyrophilin, subfamily 2, member A1;Butyrophilin subfamily 2 member A2;cDNA FLJ55336, highly similar to Homo sapiens butyrophilin, subfamily 2, member A1 (BTN2A1), transcript variant 1, mRNA;cDNA FLJ52717, highly similar to Butyrophilin subfamily 2 member A2;Putative …	BT2.1;BTF1;BTN2A1;CTA-14H9.1-001;BT2.2;BTF2;BTN2A2	Uncharacterized protein;Isoform 1 of Butyrophilin subfamily 2 member A1;butyrophilin subfamily 2 member A1 isoform 2 precursor;butyrophilin subfamily 2 member A1 isoform 4 precursor;Isoform 1 of Butyrophilin subfamily 2 member A2;butyrophilin subfamily 2 m	Q7KYR7-1;Q7KYR7;B9ZVU6;Q7KYR7-2;Q59EN4;Q9H459;Q96AV7;E9PGR4;Q8WVV5-1;Q8WVV5;Q7KYR7-3;B4DLP9;Q8WVV5-2;B4DQ01;C9IY66;C9JAJ6;C9JNC3	12	4	4	7.4	60.041	529	6.168e-12	1.0891	7479300	4344700	3134600
11S regulator complex subunit beta;Activator of multicatalytic protease subunit 2;Proteasome activator 28 subunit beta;Proteasome activator complex subunit 2;Putative uncharacterized protein PSME2;Cell migration-inducing protein 22;PSME2 protein;Full-length cDNA clone CS0DJ015YJ12 of T cells (Jurkat cell line) of Homo sapiens (human)	PSME2	Uncharacterized protein	Q9UL46;A8MZ76;C9JE52;Q2TNB3;Q6FHK9;Q86SZ7	1	4	4	16.1	29.126	254	1.5758e-08	1.0892	6876200	3397200	3478900
Glypican-1;Secreted glypican-1;Glypican 1 variant	GPC1	Protein;Glypican-1;Protein;Protein	P35052;Q53EX3	7	7	7	11.5	66.4	598	5.9941e-19	1.0906	23160000	11457000	11703000
Long-chain acyl-CoA synthetase 3;Long-chain-fatty-acid--CoA ligase 3;cDNA, FLJ95462, highly similar to Homo sapiens fatty-acid-Coenzyme A ligase, long-chain 3 (FACL3),mRNA;cDNA FLJ10609 fis, clone NT2RP2005276, highly similar to Long-chain-fatty-acid--CoA ligase 3 (EC 6.2.1.3);cDNA FLJ13129 fis, clone NT2RP3002969, highly similar to Long-chain-fatty-acid--CoA ligase 3 (EC 6.2.1.3);ACSL3 protein	ACS3;ACSL3;FACL3;LACS3	Long-chain-fatty-acid--CoA ligase 3	O95573;B2RBE0;B3KMA6;B3KN05;Q6PIM8	4	8	8	11.5	80.419	720	1.7226e-39	1.0914	39241000	23383000	15858000
4F2 cell-surface antigen heavy chain;4F2 heavy chain antigen;Lymphocyte activation antigen 4F2 large subunit;cDNA FLJ54090, highly similar to 4F2 cell-surface antigen heavy chain	MDU1;SLC3A2	Isoform 1 of 4F2 cell-surface antigen heavy chain;4F2 cell-surface antigen heavy chain isoform b;Isoform 4 of 4F2 cell-surface antigen heavy chain;68 kDa protein;Isoform 3 of 4F2 cell-surface antigen heavy chain;Isoform 2 of 4F2 cell-surface antigen heavy	P08195-1;P08195;P08195-4;P08195-3;P08195-2;B4E2Z3	11	20	14	37.8	67.993	630	3.1993e-268	1.094	2299800000	840250000	1459600000
Mitochondrial import inner membrane translocase subunit Tim17-B	JM3;TIM17B;TIMM17B	Mitochondrial import inner membrane translocase subunit Tim17-B;mitochondrial import inner membrane translocase subunit Tim17-B isoform 1	O60830	2	2	2	8.1	18.273	172	0.0042233	1.0959	10187000	5333800	4853100
Prohibitin;cDNA FLJ78511, highly similar to Homo sapiens prohibitin (PHB), mRNA;cDNA, FLJ93035, Homo sapiens prohibitin (PHB), mRNA;Prohibitin, isoform CRA_a;Prohibitin variant;PHB protein;Putative uncharacterized protein PHB	PHB;hCG_29613	Prohibitin;Uncharacterized protein;Uncharacterized protein;Uncharacterized protein;Uncharacterized protein	P35232;A8K401;Q53FV0;Q6FHP5;Q6PUJ7;C9JW96;E9PCW0;E7ESE2;C9JZ20	8	9	9	31.6	29.804	272	1.0223e-40	1.0961	91302000	41574000	49728000
Cellular disintegrin-related protein;Disintegrin and metalloproteinase domain-containing protein 9;Meltrin-gamma;Metalloprotease/disintegrin/cysteine-rich protein 9;Myeloma cell metalloproteinase;cDNA FLJ59176, highly similar to ADAM 9 (EC 3.4.24.-) (A disintegrinand metalloproteinase domain 9);ADAM9 protein;Putative uncharacterized protein ADAM9	ADAM9;KIAA0021;MCMP;MDC9;MLTNG	Isoform 1 of Disintegrin and metalloproteinase domain-containing protein 9;Uncharacterized protein	Q13443-1;Q13443;B4DDM8;A0AVL1;C9J643	4	5	5	6	90.555	819	2.2816e-10	1.0985	19775000	7775100	12000000
B-cell receptor-associated protein BAP37;D-prohibitin;Prohibitin-2;Repressor of estrogen receptor activity;PNAS-141;cDNA FLJ56579, highly similar to Prohibitin-2;cDNA FLJ60175, highly similar to Prohibitin-2	BAP;PHB2;REA	Prohibitin-2;30 kDa protein;cDNA FLJ56579, highly similar to Prohibitin-2;29 kDa protein;24 kDa protein;cDNA FLJ60175, highly similar to Prohibitin-2	Q99623;Q9BXV3;B4DP75;B4DW05	9	12	12	37.8	33.296	299	2.5501e-59	1.1029	84431000	44079000	40352000
Tubulin beta-2 chain;Tubulin beta-2C chain;Class IVb beta tubulin;Tubulin, beta 2C;TUBB2C protein;cDNA FLJ11352 fis, clone HEMBA1000020, highly similar to Tubulin beta-2C chain;Tubulin 5 beta;Tubulin beta-4 chain;cDNA FLJ55189, highly similar to Tubulin beta-4 chain;cDNA FLJ53341, highly similar to Tubulin beta-4 chain	TUBB2C;TUBB4;TUBB5	Tubulin beta-2C chain;cDNA FLJ11352 fis, clone HEMBA1000020, highly similar to Tubulin beta-2C chain;Tubulin beta-4 chain;cDNA FLJ53341, highly similar to Tubulin beta-4 chain	P68371;Q8IWP6;Q8IZ29;Q8N6N5;Q96HX0;B3KML9;P04350;B4DE77;B4DJ43	18	15	2	34.4	49.83	445	1.4951e-173	1.1035	520020000	194200000	325820000
Deubiquitinating enzyme FAF-X;Fat facets in mammals;Fat facets protein-related, X-linked;Probable ubiquitin carboxyl-terminal hydrolase FAF-X;Ubiquitin thioesterase FAF-X;Ubiquitin-specific protease 9, X chromosome;Ubiquitin-specific-processing protease FAF-X;Ubiquitin carboxyl-terminal hydrolase;USP9X protein variant;USP9X protein;cDNA FLJ60509, highly similar to Probable ubiquitin carboxyl-term…	DFFRX;FAM;USP9;USP9X;hCG_18381	Isoform 1 of Probable ubiquitin carboxyl-terminal hydrolase FAF-X;Isoform 2 of Probable ubiquitin carboxyl-terminal hydrolase FAF-X;Uncharacterized protein	Q93008-3;Q93008;Q93008-1;D3DWB6;Q59EZ5;Q6P468;Q86X58;B4DGX9;E9PFG1	5	5	5	2	292.28	2570	7.1212e-08	1.1054	4615600	2779500	1836200
205 kDa nucleoporin;Nuclear pore complex protein Nup205;Nucleoporin Nup205;cDNA FLJ50078, highly similar to Nuclear pore complex protein Nup205;NUP205 protein	C7orf14;KIAA0225;NUP205	Nuclear pore complex protein Nup205	Q92621;B4DE72;Q4VBX7;Q6DKH1;Q6P486	3	9	9	4.6	227.92	2012	1.823e-18	1.1055	12342000	5593500	6748100
Developmentally-regulated endothelial cell locus 1 protein;EGF-like repeat and discoidin I-like domain-containing protein 3;Integrin-binding protein DEL1;EGF-like repeats and discoidin I-like domains 3;cDNA FLJ50929, highly similar to EGF-like repeat and discoidin I-likedomain-containing protein 3	DEL1;EDIL3	Isoform 1 of EGF-like repeat and discoidin I-like domain-containing protein 3;Isoform 2 of EGF-like repeat and discoidin I-like domain-containing protein 3	O43854-1;O43854;Q8N610;O43854-2;B7Z865	2	8	8	15.4	53.764	480	2.4987e-73	1.1064	176740000	71160000	105580000
Adenine nucleotide translocator 3;ADP,ATP carrier protein 3;ADP,ATP carrier protein, isoform T2;ADP/ATP translocase 3;Solute carrier family 25 member 6;ADP/ATP translocase;ADP,ATP carrier protein, liver isoform T2 variant;cDNA, FLJ92654, highly similar to Homo sapiens solute carrier family 25 (mitochondrial carrier; adenine nucleotide translocator), member 6 (SLC25A6), mRNA;SLC25A6 protein;Solute…	ANT3;CDABP0051;SLC25A6;hCG_1746794	ADP/ATP translocase 3;17 kDa protein	P12236;O75961;Q59EI9;Q6I9V5	2	11	1	32.2	32.866	298	6.0036e-34	1.1099	738980000	546270000	192710000
Ephrin type-B receptor 4;Tyrosine-protein kinase receptor HTK;Tyrosine-protein kinase TYRO11;cDNA FLJ57009, highly similar to Ephrin type-B receptor 4 (EC 2.7.10.1);Ephrin receptor;Soluble EPHB4 variant 1;Soluble EPHB4 variant 3	EPHB4;HTK;TYRO11;hCG_20448;tcag7.1248	Ephrin type-B receptor 4;Ephrin receptor	P54760;B4DVT5;Q541P7;Q59F17;Q7Z635;B5A970;B5A972;Q96L35	3	8	6	8.8	108.27	987	6.8116e-67	1.1136	19875000	9818300	10057000
GAPex-5;GTPase-activating protein and VPS9 domain-containing protein 1;Rab5-activating protein 6;cDNA FLJ61592, highly similar to Homo sapiens GTPase activating protein and VPS9 domains 1 (GAPVD1), mRNA;GTPase activating protein and VPS9 domains 1;cDNA FLJ13779 fis, clone PLACE4000445, highly similar to Homo sapiens GTPase activating protein and VPS9 domains 1 (GAPVD1), mRNA;Putative uncharacteri…	GAPEX5;GAPVD1;KIAA1521;RAP6;RP11-184B22.1-009;RP11-184B22.1-011;RP11-184B22.1-005	Isoform 6 of GTPase-activating protein and VPS9 domain-containing protein 1;Isoform 1 of GTPase-activating protein and VPS9 domain-containing protein 1;Isoform 2 of GTPase-activating protein and VPS9 domain-containing protein 1;Isoform 5 of GTPase-activati	Q14C86-6;Q14C86;Q14C86-1;Q14C86-2;B4DK42;Q14C86-5;B0QZ66;Q14C86-4;B3KN67;Q14C86-3;B5MDH9;C9IZ08;B0QZ67;B4DGD8;B0QZ65	11	6	6	3.6	166.17	1487	2.5638e-12	1.1141	5671900	2711200	2960700
Tubulin beta chain;Tubulin beta-5 chain;cDNA FLJ56903, highly similar to Tubulin beta-7 chain;Beta 5-tubulin;Beta-tubulin protein;Tubulin beta polypeptide;Tubulin, beta;Tubulin, beta, isoform CRA_a;MRNA encoding beta-tubulin. (from clone D-beta-1);cDNA FLJ50617, highly similar to Tubulin beta-7 chain;cDNA, FLJ79164, highly similar to Tubulin beta-7 chain;cDNA, FLJ79215, highly similar to Tubulin …	OK/SW-cl.56;TUBB;TUBB5;DAAP-285E11.4-001;DADB-118P11.3-001;DAMA-26D6.3-001;DAMC-316D20.4-001;DAQB-47P19.9-001;DASS-191K16.2-001;hCG_26016;XXbac-BCX111D4.2-001;XXbac-BPG252P9.4-001;DAAP-285E11.4-003;DADB-118P11.3-003;DAMA-26D6.3-003;DAMC-316D20.4-003;DAQB-47P19.9-003;DASS-191K16.2-003;XXbac-BCX111D4.2-003;XXbac-BPG252P9.4-003;DAAP-285E11.4-002;DADB-118P11.3-002;DAMA-26D6.3-002;DAMC-316D20.4-002;DA…	cDNA FLJ56903, highly similar to Tubulin beta-7 chain;Tubulin, beta;Tubulin, beta;cDNA FLJ52378, highly similar to Tubulin beta-7 chain;cDNA FLJ53063, highly similar to Tubulin beta-7 chain;cDNA FLJ52029, highly similar to Tubulin beta-7 chain;XTP3TPA-tran	P07437;B4DY90;Q5SU16;Q6LC01;B4DQN9;B7ZAF0;B7ZAK1;Q5JP53;Q5ST81;Q9BUU9;B4E052;Q6P602;Q96B85;B4DMU8;E7EX69;B4DXZ5;E7ENH1;Q1KSF8	8	14	2	29.3	52.048	464	8.447e-165	1.1146	78330000	30023000	48308000
Natural killer cell-enhancing factor B;Peroxiredoxin-2;PRP;Thiol-specific antioxidant protein;Thioredoxin peroxidase 1;Thioredoxin-dependent peroxide reductase 1;cDNA FLJ60461, highly similar to Peroxiredoxin-2 (EC 1.11.1.15);Peroxiredoxin 2, isoform CRA_a;Putative uncharacterized protein PRDX2	NKEFB;PRDX2;TDPX1;hCG_172488	Peroxiredoxin-2;cDNA FLJ60461, highly similar to Peroxiredoxin-2;Uncharacterized protein	P32119;B4DF70;A6NIW5	4	8	7	31.8	21.892	198	2.7314e-64	1.1149	733010000	356550000	376460000
cDNA FLJ51825, highly similar to Single-stranded DNA-binding protein, mitochondrial;Single-stranded DNA binding protein 1, isoform CRA_c;PWP1-interacting protein 17;Single-stranded DNA-binding protein, mitochondrial;cDNA, FLJ93504, Homo sapiens single-stranded DNA binding protein 1 (SSBP1), mRNA;Single-stranded DNA binding protein 1;Single-stranded DNA binding protein 1, isoform CRA_a;Putative un…	hCG_2014251;SSBP1;SSBP;tcag7.401	cDNA FLJ51825, highly similar to Single-stranded DNA-binding protein, mitochondrial;Single-stranded DNA-binding protein, mitochondrial;Uncharacterized protein;Uncharacterized protein	B7Z268;Q04837;A4D1U3;Q567R6;E7EUY5;C9K0U8	4	6	6	31.4	18.558	159	3.4413e-110	1.1164	256950000	153660000	103290000
Cadherin family member 5;Desmoglein-2;HDGC	CDHF5;DSG2	Desmoglein-2	Q14126	1	13	13	12.4	122.29	1118	2.7112e-191	1.1185	249260000	81043000	168220000
CCT-delta;Stimulator of TAR RNA-binding;T-complex protein 1 subunit delta	CCT4;CCTD;SRB	T-complex protein 1 subunit delta;T-complex protein 1 subunit delta;Chaperonin Cpn60/TCP-1 family protein;T-complex protein 1 subunit delta;T-complex protein 1 subunit delta	P50991;A8K3C3;B7Z2Z8;B7Z8B1;B7Z9L0;B7Z2F4	5	11	11	18.6	57.924	539	1.4117e-54	1.1195	70893000	37671000	33222000
Outer mitochondrial membrane protein porin 2;Voltage-dependent anion-selective channel protein 2;cDNA FLJ60120, highly similar to Voltage-dependent anion-selective channel protein 2;cDNA, FLJ78818, highly similar to Voltage-dependent anion-selective channel protein 2;Voltage-dependent anion channel 2	VDAC2;RP11-375G3.1-010;RP11-375G3.1-005	Isoform 1 of Voltage-dependent anion-selective channel protein 2;Isoform 3 of Voltage-dependent anion-selective channel protein 2;Voltage-dependent anion-selective channel protein 2;Isoform 2 of Voltage-dependent anion-selective channel protein 2;30 kDa pr	P45880-1;P45880;P45880-3;P45880-2;B4DKM5;Q5JSD1;Q5JSD2	9	7	7	25.2	33.371	309	1.3777e-30	1.129	146910000	103390000	43522000
Auberger B antigen;Basal cell adhesion molecule;B-CAM cell surface glycoprotein;F8/G253 antigen;Lutheran antigen;Lutheran blood group glycoprotein;Lutheran glycoprotein;Lutheran blood group	BCAM;LU;MSK19	Basal cell adhesion molecule;basal cell adhesion molecule isoform 2 precursor	P50895;A9LST5;A9YWT4;A9YWT7;D0AB07	2	7	7	14.2	67.404	628	2.087e-92	1.1301	16703000	6804600	9898600
60S ribosomal protein L11;CLL-associated antigen KW-12;Cell growth-inhibiting protein 34;cDNA, FLJ92077, Homo sapiens ribosomal protein L11 (RPL11), mRNA;Ribosomal protein L11;Ribosomal protein L11, isoform CRA_b	RPL11;hCG_1739238;RP11-223J15.3-001;RP11-223J15.3-005;RP11-223J15.3-004	Isoform 1 of 60S ribosomal protein L11;Isoform 2 of 60S ribosomal protein L11;Ribosomal protein L11;Ribosomal protein L11	P62913-1;P62913;Q08ES8;Q5VVD0;P62913-2;Q5VVC8;Q5VVC9	4	2	2	12.9	20.252	178	6.0277e-17	1.1339	4894000	2129700	2764300
Delta(6) fatty acid desaturase;Fatty acid desaturase 2;cDNA FLJ14553 fis, clone NT2RM2001785, highly similar to Homo sapiens fatty acid desaturase 2 (FADS2), mRNA;cDNA FLJ14671 fis, clone NT2RP2003466, highly similar to Homo sapiens fatty acid desaturase 2 (FADS2), mRNA;cDNA FLJ41246 fis, clone BRAMY2032696, highly similar to Homo sapiens fatty acid desaturase 2 (FADS2), mRNA;cDNA FLJ56373, highl…	FADS2	Isoform 1 of Fatty acid desaturase 2;Isoform 3 of Fatty acid desaturase 2;Isoform 2 of Fatty acid desaturase 2;cDNA FLJ56373, highly similar to Homo sapiens fatty acid desaturase 2 (FADS2), mRNA	O95864-1;O95864;O95864-3;O95864-2;B3KNG5;B3KNI9;B3KVS0;B7Z634	4	2	2	5.4	52.259	444	8.6536e-05	1.1347	6064800	3195300	2869500
CD49 antigen-like family member E;Fibronectin receptor subunit alpha;Integrin alpha-5;Integrin alpha-5 heavy chain;Integrin alpha-5 light chain;Integrin alpha-F;VLA-5;cDNA FLJ77742, highly similar to Homo sapiens integrin, alpha 5 (fibronectin receptor, alpha polypeptide), mRNA;cDNA, FLJ92752, highly similar to Homo sapiens integrin, alpha 5 (fibronectin receptor, alphapolypeptide) (ITGA5), mRNA	FNRA;ITGA5	Integrin alpha-5	P08648;A8K6A5;B2R627	1	13	13	13.7	114.54	1049	6.6144e-187	1.1391	366950000	161320000	205630000
EH domain-containing protein 1;PAST homolog 1;Testilin;cDNA FLJ40523 fis, clone TESTI2046872, highly similar to EH-domain-containing protein 1;cDNA, FLJ92624, highly similar to Homo sapiens EH-domain containing 1 (EHD1), mRNA;EH-domain containing 1, isoform CRA_b;cDNA FLJ53363, highly similar to EH-domain-containing protein 1;cDNA FLJ53643, highly similar to EH-domain-containing protein 1;cDNA FL…	CDABP0131;EHD1;PAST;PAST1;hCG_23386	EH domain-containing protein 1;cDNA FLJ55347, highly similar to EH-domain-containing protein 1;cDNA FLJ55166, highly similar to EH-domain-containing protein 1;Uncharacterized protein	Q9H4M9;B2R5U3;B4DMV9;B4DR44;B4DTR4;C9J2Z4;B4DZH9;C9JC03;C9JDQ8	6	3	3	6	60.626	534	3.0912e-08	1.1421	5311900	2156500	3155400
cDNA FLJ56370, highly similar to Homo sapiens FK506 binding protein 8, 38kDa (FKBP8), mRNA;38 kDa FK506-binding protein;FK506-binding protein 8;FKBPR38;Peptidyl-prolyl cis-trans isomerase FKBP8;Rotamase;cDNA, FLJ93891, Homo sapiens FK506 binding protein 8, 38kDa (FKBP8), mRNA;FKBP8 isoform 1	FKBP38;FKBP8	cDNA FLJ56370, highly similar to Homo sapiens FK506 binding protein 8, 38kDa (FKBP8), mRNA;Isoform 2 of Peptidyl-prolyl cis-trans isomerase FKBP8;Isoform 1 of Peptidyl-prolyl cis-trans isomerase FKBP8;FKBP8 isoform 1	B7Z6M0;Q14318-2;Q14318;B2R8G6;Q14318-1;C8C9T5	4	2	2	5.4	47.171	441	8.3717e-22	1.1432	6724200	4665600	2058600
ANO6 protein;Anoctamin-6;Transmembrane protein 16F;cDNA FLJ59290, highly similar to Transmembrane protein 16F	ANO6;TMEM16F	anoctamin-6 isoform d;Anoctamin-6;anoctamin-6 isoform b	B9EGG0;Q4KMQ2;B4E1V1;E7ENK4;E9PB30	3	1	1	0.9	108.43	931	0.070914	1.146	4917000	3578600	1338300
Complex III subunit 4;Complex III subunit IV;Cytochrome b-c1 complex subunit 4;Cytochrome c1, heme protein, mitochondrial;Ubiquinol-cytochrome-c reductase complex cytochrome c1 subunit;Putative uncharacterized protein	CYC1	Cytochrome c1, heme protein, mitochondrial	P08574;Q8TBT6	1	4	4	8.9	35.422	325	0.00042708	1.1469	28338000	14614000	13724000
EFL-3;ELK ligand;EPH-related receptor tyrosine kinase ligand 2;Ephrin-B1	EFL3;EFNB1;EPLG2;LERK2	Ephrin-B1;Conserved hypothetical protein	P98172	2	3	3	14.7	38.006	346	1.8595e-13	1.1485	6377400	2311900	4065500
Chromosome condensation-related SMC-associated protein 1;Chromosome-associated protein D2;Condensin complex subunit 1;Non-SMC condensin I complex subunit D2;XCAP-D2 homolog;cDNA FLJ43165 fis, clone FCBBF3002163, highly similar to Homo sapiens chromosome condensation-related SMC-associated protein 1	CAPD2;CNAP1;KIAA0159;NCAPD2	Condensin complex subunit 1;Condensin complex subunit 1;Uncharacterized protein	Q15021;B3KMS0;B3KY03;B4E0B7;E7EN77;Q6ZV00	3	6	6	3.9	157.18	1401	3.2932e-09	1.1548	7553800	4753900	2799900
Aging-associated gene 8 protein;Sigma 1-type opioid receptor;Sigma non-opioid intracellular receptor 1;SR31747-binding protein;cDNA FLJ57078, highly similar to Homo sapiens opioid receptor, sigma 1 (OPRS1), transcript variant 1, mRNA;cDNA FLJ76396, highly similar to Homo sapiens opioid receptor, sigma 1 (OPRS1), transcript variant 2, mRNA;HCG20471, isoform CRA_d;Opioid receptor, sigma 1	AAG8;OPRS1;SIGMAR1;SRBP;hCG_20471;RP11-443P11.3-008	Isoform 1 of Sigma non-opioid intracellular receptor 1;Isoform 3 of Sigma non-opioid intracellular receptor 1;Isoform 4 of Sigma non-opioid intracellular receptor 1	Q99720-1;Q99720;B4DR71;Q99720-3;A2A3U5;Q99720-4	3	1	1	3.6	25.127	223	3.6584e-05	1.1599	27613000	13900000	13714000
Alpha-tubulin 1;Testis-specific alpha-tubulin;Tubulin alpha-1 chain;Tubulin alpha-4A chain;Tubulin H2-alpha;cDNA FLJ58687, highly similar to Tubulin alpha-4 chain;Putative uncharacterized protein TUBA4A;Tubulin, alpha 1 (Testis specific), isoform CRA_a	TUBA1;TUBA4A;hCG_2013418	Tubulin alpha-4A chain;cDNA FLJ58687, highly similar to Tubulin alpha-4 chain	P68366;A8MUB1	18	15	2	32.6	49.924	448	3.283e-51	1.1604	55684000	24890000	30794000
Sm protein F;Small nuclear ribonucleoprotein F	PBSCF;SNRPF	Small nuclear ribonucleoprotein F	P62306	1	2	2	24.4	9.7251	86	1.4879e-23	1.1621	5927800	2981100	2946800
Plexin-D1;cDNA FLJ58111, highly similar to Plexin-D1;PLXND1 protein;Similar to plexin A	KIAA0620;PLXND1	Isoform 1 of Plexin-D1;Isoform 2 of Plexin-D1	Q9Y4D7-1;Q9Y4D7;B4DRU3;Q6P657;Q86YC4;Q9Y4D7-2	8	5	4	2.4	212	1925	5.7605e-13	1.1626	3900900	1760200	2140700
cDNA FLJ76855, highly similar to Homo sapiens exportin 7 (XPO7), mRNA;Exportin-7;Ran-binding protein 16;cDNA FLJ56596, highly similar to Exportin-7;Exportin 7, isoform CRA_c	KIAA0745;RANBP16;XPO7;hCG_23798	Uncharacterized protein;Exportin-7	A8K607;E7ESC6;E9PEN8;Q9UIA9;B4DSP8;D3DSQ7	3	15	15	13	124.84	1096	2.0022e-28	1.1675	41961000	16104000	25856000
40S ribosomal protein S21;Ribosomal protein S21;Ribosomal protein S21, isoform CRA_d;RPS21 protein	RPS21;hCG_41768	40S ribosomal protein S21;40S ribosomal protein S21	P63220;Q6FGH5;Q8WVC2	2	1	1	12	9.1113	83	0.0021785	1.1683	3302000	2065000	1237000
Deubiquitinating enzyme 24;Ubiquitin carboxyl-terminal hydrolase 24;Ubiquitin thioesterase 24;Ubiquitin-specific-processing protease 24;Ubiquitin carboxyl-terminal hydrolase	KIAA1057;USP24	Ubiquitin carboxyl-terminal hydrolase 24;Ubiquitin carboxyl-terminal hydrolase	Q9UPU5;B7WPF4	2	2	2	0.7	294.36	2620	0.0036903	1.1709	2123400	1490200	633240
Importin subunit beta-1;Importin-90;Karyopherin subunit beta-1;Nuclear factor p97;Pore targeting complex 97 kDa subunit;cDNA, FLJ95650, highly similar to Homo sapiens karyopherin (importin) beta 1 (KPNB1), mRNA;cDNA FLJ50715, highly similar to Importin beta-1 subunit;cDNA, FLJ79320, highly similar to Importin beta-1 subunit;cDNA FLJ50625, highly similar to Importin beta-1 subunit	KPNB1;NTF97	Importin subunit beta-1;cDNA, FLJ79320, highly similar to Importin beta-1 subunit;cDNA FLJ50625, highly similar to Importin beta-1 subunit	Q14974;B2RBR9;B7Z752;B7ZAV6;B7Z5M1	3	13	13	13.9	97.169	876	4.5797e-89	1.1718	96228000	36857000	59371000
Cytidine monophosphokinase 2;Testis-specific protein TSA903;Uridine monophosphokinase 2;Uridine-cytidine kinase 2	UCK2;UMPK	Isoform 1 of Uridine-cytidine kinase 2;Isoform 2 of Uridine-cytidine kinase 2	Q9BZX2-1;Q9BZX2;Q9BZX2-2	6	3	3	11.9	29.299	261	1.4752e-15	1.1752	6998200	3409300	3589000
Acute morphine dependence-related protein 2;CCT-zeta-1;HTR3;T-complex protein 1 subunit zeta;Tcp20;cDNA, FLJ94440, highly similar to Homo sapiens chaperonin containing TCP1, subunit 6A (zeta 1)(CCT6A), mRNA;Chaperonin containing TCP1, subunit 6A isoform a variant;Putative uncharacterized protein CCT6A;cDNA FLJ53065, highly similar to T-complex protein 1 subunit zeta;Chaperonin subunit 6A;cDNA FLJ…	CCT6;CCT6A;CCTZ	T-complex protein 1 subunit zeta;T-complex protein 1 subunit zeta isoform b;cDNA, FLJ79129, highly similar to T-complex protein 1 subunit zeta;43 kDa protein	P40227;B2R9K8;Q59ET3;A6NCD2;B4DN39;A1JUI8;B4DPJ8	4	8	4	14.1	58.024	531	7.1968e-18	1.177	32350000	10058000	22292000
Neutral sphingomyelinase 3;Neutral sphingomyelinase III;Sphingomyelin phosphodiesterase 4;cDNA FLJ53260, highly similar to Homo sapiens sphingomyelin phosphodiesterase 4, neutral membrane, transcript variant 2, mRNA;SKNY protein;cDNA FLJ59395, highly similar to Homo sapiens sphingomyelin phosphodiesterase 4, neutral membrane, transcript variant 1, mRNA;cDNA FLJ54527, highly similar to Homo sapien…	KIAA1418;SMPD4;FLJ20297;hCG_1992407	Isoform 4 of Sphingomyelin phosphodiesterase 4;sphingomyelin phosphodiesterase 4 isoform 2;sphingomyelin phosphodiesterase 4 isoform 1;sphingomyelin phosphodiesterase 4 isoform 3;Isoform 3 of Sphingomyelin phosphodiesterase 4;cDNA FLJ54527, highly similar	Q9NXE4-4;Q9NXE4;B4E0L6;Q9NXE4-1;B1PBA3;Q9NXE4-2;E9PHD5;B4DRB8;E9PCE6;Q9NXE4-3;B4E0T5;E7ESA2;B4DM23;B4DQ31;B4DWK7;Q9NXE4-5	12	2	2	2.1	98.147	873	7.2948e-11	1.1783	2475500	813510	1662000
5F7;Basigin;Collagenase stimulatory factor;Extracellular matrix metalloproteinase inducer;Leukocyte activation antigen M6;OK blood group antigen;Tumor cell-derived collagenase stimulatory factor;cDNA FLJ52708, highly similar to Basigin;cDNA FLJ61188, highly similar to Basigin;Basigin (Ok blood group), isoform CRA_a;cDNA FLJ36018 fis, clone TESTI2016337, highly similar to BASIGIN;Cervical EMMPRIN;…	BSG;UNQ6505/PRO21383;hCG_20562;hEMMPRIN	Isoform 1 of Basigin;Isoform 2 of Basigin;basigin isoform 4;Basigin isoform 3;Uncharacterized protein	P35613-1;P35613;B4DNE1;P35613-2;B4DY23;Q54A51;A6NJW1;D3YLG5;A8MZ77;B4DL60	5	10	10	27.5	42.2	385	6.8076e-179	1.1795	2223200000	847500000	1375700000
Dihydropyridine receptor alpha 2 subunit;Voltage-dependent calcium channel subunit alpha-2/delta-1;Voltage-dependent calcium channel subunit alpha-2-1;Voltage-dependent calcium channel subunit delta-1;Voltage-gated calcium channel subunit alpha-2/delta-1;Putative uncharacterized protein CACNA2D1;Calcium channel; match to P54289 (PID:g1705852)	CACNA2D1;CACNL2A;CCHL2A;MHS3;WUGSC:H_DJ0560O14.1	Dihydropyridine receptor alpha 2 subunit;Isoform 1 of Voltage-dependent calcium channel subunit alpha-2/delta-1;Isoform 2 of Voltage-dependent calcium channel subunit alpha-2/delta-1;Isoform 3 of Voltage-dependent calcium channel subunit alpha-2/delta-1;Is	E7EUY9;Q9UIU0;P54289-1;P54289;P54289-2;Q9UDL7;Q9UDQ3;P54289-3;P54289-5;P54289-4	15	11	11	10.3	125.31	1110	1.4111e-45	1.1804	41394000	14965000	26428000
cDNA FLJ52712, highly similar to Tubulin beta-6 chain;cDNA FLJ35358 fis, clone PUAEN2000497, highly similar to Tubulin beta-6 chain;Tubulin, beta 6, isoform CRA_a;cDNA FLJ52847, highly similar to Tubulin beta-6 chain	hCG_1641604;TUBB6	cDNA FLJ52712, highly similar to Tubulin beta-6 chain;cDNA FLJ35358 fis, clone PUAEN2000497, highly similar to Tubulin beta-6 chain	B4DP54;B3KS31;B4E386	2	10	2	25.1	46.701	418	1.2728e-76	1.1808	10340000	3826100	6513600
Cellular apoptosis susceptibility protein;Chromosome segregation 1-like protein;Exportin-2;Importin-alpha re-exporter;Cellular apoptosis susceptibility protein variant 2;cDNA FLJ54022, highly similar to Exportin-2;cDNA FLJ53202, highly similar to Exportin-2;cDNA FLJ59371, highly similar to Exportin-2;cDNA FLJ56236, highly similar to Exportin-2	CAS;CSE1L;XPO2;CSE1L-2	Isoform 1 of Exportin-2;Isoform 3 of Exportin-2;Cellular apoptosis susceptibility protein variant 2;cDNA FLJ54022, highly similar to Exportin-2;cDNA FLJ53202, highly similar to Exportin-2;cDNA FLJ59371, highly similar to Exportin-2;cDNA FLJ56236, highly si	P55060-1;P55060;P55060-3;P55060-2;A3RLL6;B4DM31;E7ENK9;B4DUC5;B4DPS6;B4DS32;E7EPX1	8	21	21	20.9	110.42	971	7.086e-159	1.1841	331190000	131720000	199470000
NADPH:quinone reductase;Quinone oxidoreductase;Zeta-crystallin;Putative uncharacterized protein CRYZ	CRYZ	Quinone oxidoreductase;quinone oxidoreductase isoform b;Uncharacterized protein;Uncharacterized protein	Q08257;A6NN60;A6NP24;C9JH92	5	5	5	14	35.206	329	9.417e-21	1.188	18738000	13613000	5124600
Decay-accelerating factor splicing variant 5;Decay-accelerating factor 4ab;Decay-accelerating factor 1 ab;CD55 molecule, decay accelerating factor for complement (Cromer blood group);CD55 antigen, decay accelerating factor for complement (Cromer blood group), isoform CRA_g;Decay-accelerating factor splicing variant 4;Decay-accelerating factor 1a;Complement decay-accelerating factor;Decay-accelera…	DAF;CD55;RP11-357P18.1-008;hCG_22206;RP11-357P18.1-003;CR;RP11-357P18.1-002	Decay-accelerating factor splicing variant 5;Decay-accelerating factor splicing variant 4;CD55 molecule, decay accelerating factor for complement;Isoform 1 of Complement decay-accelerating factor;Decay-accelerating factor splicing variant 1;Decay-accelerat	Q14UF2;Q8TD11;Q8TD13;B1AP16;D3DT86;Q14UF3;Q8TD14;B1AP13;P08174-2;P08174;Q14UF6;Q14UF4;P08174-1;B2R658;E7ER69;E9PSH2;Q14UF5;B4DUF2;D3DT85;B1AP15;Q76N74;Q8TD12	11	11	11	17.8	59.037	551	3.8254e-46	1.1935	494610000	192440000	302170000
Nicalin;Nicastrin-like protein;cDNA, FLJ94705, highly similar to Homo sapiens nicalin (LOC56926), mRNA	NCLN	Isoform 1 of Nicalin;Isoform 2 of Nicalin	Q969V3-1;Q969V3;B2RA56;Q969V3-2	2	5	5	7.8	62.974	563	4.2896e-12	1.1936	42112000	20933000	21179000
Cullin-associated and neddylation-dissociated protein 1;Cullin-associated NEDD8-dissociated protein 1;p120 CAND1;TBP-interacting protein of 120 kDa A;cDNA FLJ77762, highly similar to Homo sapiens cullin-associated and neddylation-dissociated 1 (CAND1), mRNA;cDNA FLJ10114 fis, clone HEMBA1002770, highly similar to Cullin-associated NEDD8-dissociated protein 1;cDNA FLJ10929 fis, clone OVARC1000479,…	CAND1;KIAA0829;TIP120;TIP120A	Isoform 1 of Cullin-associated NEDD8-dissociated protein 1;Isoform 2 of Cullin-associated NEDD8-dissociated protein 1	Q86VP6-1;Q86VP6;A8K8U1;Q86VP6-2;B3KM30;B3KMG3	7	27	27	22.3	136.37	1230	2.5847e-190	1.1992	366320000	169410000	196900000
Calvasculin;Metastasin;Placental calcium-binding protein;Protein Mts1;Protein S100-A4;S100 calcium-binding protein A4	CAPL;MTS1;S100A4	Protein S100-A4;11 kDa protein	P26447	2	4	4	25.7	11.728	101	8.2314e-18	1.1998	58460000	26161000	32299000
Glutaryl-CoA dehydrogenase, mitochondrial;cDNA FLJ59956, highly similar to Glutaryl-CoA dehydrogenase, mitochondrial (EC 1.3.99.7);cDNA FLJ59559, highly similar to Glutaryl-CoA dehydrogenase, mitochondrial (EC 1.3.99.7);cDNA FLJ60352, highly similar to Glutaryl-CoA dehydrogenase, mitochondrial (EC 1.3.99.7)	GCDH	Isoform Long of Glutaryl-CoA dehydrogenase, mitochondrial;Uncharacterized protein;cDNA FLJ59559, highly similar to Glutaryl-CoA dehydrogenase, mitochondrial;cDNA FLJ60352, highly similar to Glutaryl-CoA dehydrogenase, mitochondrial;Isoform Short of Glutary	Q92947-1;Q92947;B4DQF2;E9PFT4;B4DK85;B4DUY0;Q92947-2	9	4	4	8.4	48.127	438	3.365e-10	1.213	8499900	3040100	5459700
Antigenic surface determinant protein OA3;Integrin-associated protein;Leukocyte surface antigen CD47;Protein MER6;Integrin-associated protein CD47	CD47;MER6	Isoform OA3-323 of Leukocyte surface antigen CD47;Isoform OA3-312 of Leukocyte surface antigen CD47;Isoform OA3-305 of Leukocyte surface antigen CD47;Isoform OA3-293 of Leukocyte surface antigen CD47	Q08722-1;Q08722;E9PB22;Q08722-4;Q08722-3;Q71A41;Q08722-2	4	3	3	8.7	35.213	323	1.6244e-05	1.2141	56997000	21310000	35688000
ATP-binding cassette sub-family B member 7, mitochondrial;ATP-binding cassette transporter 7;cDNA FLJ10556 fis, clone NT2RP2002479, highly similar to ATP-binding cassette sub-family B member 7, mitochondrial;Putative uncharacterized protein DKFZp686K20196;cDNA FLJ53391, highly similar to ATP-binding cassette sub-family B member 7, mitochondrial	ABC7;ABCB7;DKFZp686K20196	Isoform 2 of ATP-binding cassette sub-family B member 7, mitochondrial;Isoform 1 of ATP-binding cassette sub-family B member 7, mitochondrial;Putative uncharacterized protein DKFZp686K20196;cDNA FLJ53391, highly similar to ATP-binding cassette sub-family B	O75027-2;O75027;B3KM98;O75027-1;Q7Z3K5;B4DGL8;E9PJR8	5	4	4	5.3	82.768	753	2.5594e-08	1.2154	4646300	1672200	2974100
1C9-2;Mitochondrial import receptor subunit TOM22 homolog;Translocase of outer membrane 22 kDa subunit homolog;Mitochondrial import receptor Tom22 variant;cDNA, FLJ92357, Homo sapiens translocase of outer mitochondrial membrane 22 homolog(yeast) (TOMM22), mRNA;HCG2010808, isoform CRA_a;MSTP065;Translocase of outer mitochondrial membrane 22 homolog (Yeast)	TOM22;TOMM22;hCG_2010808;MST065;RP3-508I15.12-001	Mitochondrial import receptor subunit TOM22 homolog	Q9NS69;Q53GB0;Q549C5	1	1	1	8.5	15.521	142	2.0912e-58	1.2161	16441000	9235500	7205500
Adenine nucleotide translocator 2;ADP,ATP carrier protein 2;ADP,ATP carrier protein, fibroblast isoform;ADP/ATP translocase 2;Solute carrier family 25 member 5;cDNA, FLJ96310, highly similar to Homo sapiens solute carrier family 25 (mitochondrial carrier; adenine nucleotide translocator), member 5 (SLC25A5), mRNA;SLC25A5 protein	ANT2;SLC25A5	ADP/ATP translocase 2	P05141;B2RCV1;Q6NVC0	2	11	2	32.2	32.852	298	5.5673e-26	1.217	19219000	9486700	9732400
ATP-binding cassette sub-family C member 4;MRP/cMOAT-related ABC transporter;Multidrug resistance-associated protein 4;Multi-specific organic anion transporter B;cDNA FLJ77042, highly similar to Homo sapiens ATP-binding cassette, sub-family C (CFTR/MRP), member 4, mRNA;ABC transporter MOAT-B isoform	ABCC4;MRP4;MOAT-B	Isoform 1 of Multidrug resistance-associated protein 4;Isoform 2 of Multidrug resistance-associated protein 4	O15439-1;O15439;A8K2Q2;O75555;O15439-2	6	5	5	3.2	149.52	1325	1.7397e-08	1.2195	5900700	2523500	3377200
DnaJ homolog subfamily C member 11;cDNA FLJ59729, highly similar to DnaJ homolog subfamily C member 11;cDNA FLJ38067 fis, clone CTONG2015345, highly similar to DnaJ homolog subfamily C member 11;cDNA FLJ53979, highly similar to DnaJ homolog subfamily C member 11	DNAJC11	Isoform 1 of DnaJ homolog subfamily C member 11;Isoform 2 of DnaJ homolog subfamily C member 11;59 kDa protein;Isoform 3 of DnaJ homolog subfamily C member 11;cDNA FLJ53979, highly similar to DnaJ homolog subfamily C member 11	Q9NVH1-1;Q9NVH1;B4DPK2;Q9NVH1-2;Q9NVH1-3;B3KTC6;B4DGD5	5	2	2	3.2	63.277	559	6.083e-05	1.2202	5760900	2557200	3203700
ADP-ribosylation factor 1;ADP-ribosylation factor 3;cDNA FLJ57770, moderately similar to ADP-ribosylation factor 3;cDNA, FLJ79427, highly similar to ADP-ribosylation factor 3;cDNA FLJ61099, highly similar to ADP-ribosylation factor 1;cDNA FLJ51902, highly similar to ADP-ribosylation factor 1	ARF1;ARF3	ADP-ribosylation factor 1;ADP-ribosylation factor 3;cDNA FLJ57770, moderately similar to ADP-ribosylation factor 3;23 kDa protein;cDNA FLJ61099, highly similar to ADP-ribosylation factor 1	P84077;P61204;B4E190;B7ZB63;B4DEB9;B4DN70	16	5	2	27.6	20.697	181	2.1348e-54	1.2247	33420000	13398000	20022000
G(i) alpha-3;Guanine nucleotide-binding protein G(k) subunit alpha;cDNA, FLJ92547, Homo sapiens guanine nucleotide binding protein (G protein), alphainhibiting activity polypeptide 3 (GNAI3), mRNA;Guanine nucleotide binding protein (G protein), alpha inhibiting activity polypeptide 3	GNAI3;hCG_1997731;RP5-1160K1.2-001	Guanine nucleotide-binding protein G(k) subunit alpha	P08754;Q5TZX1	6	6	3	17.2	40.532	354	1.0729e-21	1.2247	48209000	22766000	25443000
Importin-9;Ran-binding protein 9	HSPC273;IMP9;IPO9;KIAA1192;RANBP9	Importin-9	Q96P70	1	5	5	4.5	115.96	1041	9.2007e-09	1.2255	19312000	10636000	8675300
Putative uncharacterized protein CHCHD3;Coiled-coil-helix-coiled-coil-helix domain-containing protein 3, mitochondrial;Coiled-coil-helix-coiled-coil-helix domain containing 3;Coiled-coil-helix-coiled-coil-helix domain containing 3, isoform CRA_d;cDNA FLJ53726, highly similar to Coiled-coil-helix-coiled-coil-helixdomain-containing protein 3	CHCHD3;hCG_2014841;tcag7.1158	28 kDa protein;Uncharacterized protein;Coiled-coil-helix-coiled-coil-helix domain-containing protein 3, mitochondrial;cDNA FLJ53726, highly similar to Coiled-coil-helix-coiled-coil-helixdomain-containing protein 3	C9JRZ6;Q9NX63;A4D1N4;B7Z1X9	4	2	2	8.3	27.735	241	4.4281e-11	1.2293	6297900	2090700	4207200
cDNA FLJ56840, highly similar to Galactokinase (EC 2.7.1.6);Galactokinase 1;Galactokinase;Galactose kinase;cDNA FLJ56765, highly similar to Galactokinase (EC 2.7.1.6);cDNA, FLJ79080, highly similar to Galactokinase (EC 2.7.1.6);CDNA FLJ26554 fis, clone LNF01773, highly similar to Galactokinase;Putative uncharacterized protein GALK1	GALK1;hCG_27540;GALK	cDNA FLJ56840, highly similar to Galactokinase;Galactokinase;Uncharacterized protein	B4E1G6;P51570;B4E1A8;C8CHJ5;C8CHJ6;D1MI96;E5LAN0;Q6ZP37;Q71UH7;A6NJD0	3	4	4	10.2	45.357	422	3.2449e-24	1.2293	9078300	3938100	5140200
Herpes virus entry mediator B;Nectin-2;Poliovirus receptor-related protein 2;cDNA FLJ75689, highly similar to Homo sapiens poliovirus receptor-related 2 (herpesvirus entry mediator B) (PVRL2), mRNA;Poliovirus receptor related 2;Polio virus related protein 2, alpha isoform	HVEB;PRR2;PVRL2	Isoform Alpha of Poliovirus receptor-related protein 2;Isoform Delta of Poliovirus receptor-related protein 2	Q92692-2;Q92692;A8K5L5;Q7Z457;Q7Z458;Q9UEI6;Q92692-1;Q7Z456	2	6	6	12.9	51.359	479	2.021e-47	1.2294	94660000	37348000	57312000
Cell surface glycoprotein MUC18;Cell surface glycoprotein P1H12;Melanoma cell adhesion molecule;Melanoma-associated antigen A32;Melanoma-associated antigen MUC18;S-endo 1 endothelial-associated antigen;cDNA FLJ78619, highly similar to Homo sapiens melanoma cell adhesion molecule (MCAM), mRNA;cDNA, FLJ92775, highly similar to Homo sapiens melanoma cell adhesion molecule (MCAM), mRNA;cDNA FLJ46477 …	MCAM;MUC18	Isoform 1 of Cell surface glycoprotein MUC18	P43121-1;P43121;A8K6A6;B2R642;B3KXZ9	2	19	19	29.3	71.607	646	1.2057e-147	1.2345	808740000	300940000	507800000
Neuroplastin;Stromal cell-derived receptor 1;Putative uncharacterized protein DKFZp566H1924;Homo sapiens clone 23742;cDNA, FLJ94993, Homo sapiens stromal cell derived factor receptor 1 (SDFR1),transcript variant alpha, mRNA;Neuroplastin, isoform CRA_b	NPTN;SDFR1;SDR1;DKFZp566H1924;hCG_38795	Isoform 2 of Neuroplastin;Isoform 5 of Neuroplastin;Uncharacterized protein;Isoform 1 of Neuroplastin;Isoform 3 of Neuroplastin	Q9Y639-2;Q9Y639;Q9Y639-5;Q9UFM8;Q9Y639-4;E9PG23;Q9Y499;Q9Y639-1;B2RAL7;Q9Y639-3	6	3	3	6.3	44.387	398	5.0351e-16	1.2347	62913000	21994000	40919000
Complex I-SGDH;NADH dehydrogenase [ubiquinone] 1 beta subcomplex subunit 5, mitochondrial;NADH-ubiquinone oxidoreductase SGDH subunit;cDNA, FLJ94443, highly similar to Homo sapiens NADH dehydrogenase (ubiquinone) 1 beta subcomplex, 5, 16kDa (NDUFB5), mRNA;NADH dehydrogenase (Ubiquinone) 1 beta subcomplex, 5, 16kDa, isoform CRA_e;NDUFB5 protein;NADH dehydrogenase (Ubiquinone) 1 beta subcomplex, 5,…	NDUFB5;hCG_1787208	Protein;NADH dehydrogenase [ubiquinone] 1 beta subcomplex subunit 5, mitochondrial;NADH dehydrogenase (Ubiquinone) 1 beta subcomplex, 5, 16kDa, isoform CRA_e (Fragment);Uncharacterized protein;NADH dehydrogenase [ubiquinone] 1 beta subcomplex subunit 5, mi	O43674;B2R9L0;D3DNS1;E7EWP0;Q05D62;Q561V6	5	2	2	9.2	23.434	206	0.00076514	1.2398	6520900	3461900	3058900
Never in mitosis A-related kinase 7;Serine/threonine-protein kinase Nek7;cDNA, FLJ93949, highly similar to Homo sapiens NIMA (never in mitosis gene a)-related kinase 7 (NEK7), mRNA;cDNA FLJ55200, highly similar to Serine/threonine-protein kinase Nek6 (EC 2.7.11.1);Never in mitosis A-related kinase 6;Protein kinase SID6-1512;Serine/threonine-protein kinase Nek6;NIMA (Never in mitosis gene a)-relat…	NEK7;NEK6;RP11-101K10.6-006;RP11-101K10.6-008;RP11-101K10.6-001;RP11-101K10.6-005;RP11-101K10.6-007	Isoform 1 of Serine/threonine-protein kinase Nek7;serine/threonine-protein kinase Nek6 isoform 1;serine/threonine-protein kinase Nek6 isoform 4;serine/threonine-protein kinase Nek6 isoform 3;Serine/threonine-protein kinase Nek6;Uncharacterized protein;NIMA	Q8TDX7-1;Q8TDX7;B2R8K8;B7Z2D9;Q9HC98;E9PC32;Q5TBH0;Q5TBH1;Q5TBH2;Q5TBG7;Q5TBG1	11	2	2	6	34.551	302	0.0035984	1.2417	3829500	1967400	1862100
Protein slit-like 2;Vasorin	SLITL2;UNQ314/PRO357/PRO1282;VASN	Vasorin	Q6EMK4	1	6	6	9.4	71.712	673	2.8687e-17	1.242	76163000	44220000	31943000
Nuclear matrix protein 200;Pre-mRNA-processing factor 19;PRP19/PSO4 homolog;Senescence evasion factor	NMP200;PRP19;PRPF19;SNEV	Pre-mRNA-processing factor 19;28 kDa protein;11 kDa protein;5 kDa protein	Q9UMS4	4	2	2	3.2	55.18	504	0.046117	1.2435	21354000	7885200	13469000
Human papillomavirus type 16 E1 protein-binding protein;Thyroid hormone receptor interactor 13;Thyroid receptor-interacting protein 13	TRIP13	Isoform 1 of Thyroid receptor-interacting protein 13;thyroid receptor-interacting protein 13 isoform 2	Q15645-1;Q15645	4	7	7	17.6	48.55	432	1.6213e-53	1.2436	44664000	16763000	27902000
Alkaline phosphatase liver/bone/kidney isozyme;Alkaline phosphatase, tissue-nonspecific isozyme;Alkaline phosphatase;Alkaline phosphatase, liver/bone/kidney	ALPL;hCG_38868;RP11-293F5.7-003	Alkaline phosphatase, tissue-nonspecific isozyme;alkaline phosphatase, tissue-nonspecific isozyme isoform 2;alkaline phosphatase, tissue-nonspecific isozyme isoform 3	P05186;B2R6Q2;B7Z1D1;B7Z4Y6;B1ANL0;B7Z387;Q9UIL5	3	4	4	7.6	57.304	524	2.6782e-29	1.2453	22345000	8261400	14084000
CCT-gamma;hTRiC5;T-complex protein 1 subunit gamma;cDNA FLJ44436 fis, clone UTERU2019706, highly similar to T-complex protein 1 subunit gamma;PIG48;Chaperonin containing TCP1, subunit 3 (Gamma) variant;Chaperonin containing TCP1, subunit 3 (Gamma);cDNA FLJ57904, highly similar to T-complex protein 1 subunit gamma;Putative uncharacterized protein CCT3;cDNA FLJ57603, highly similar to T-complex pro…	CCT3;CCTG;TRIC5;RP11-443G18.6-002	T-complex protein 1 subunit gamma;T-complex protein 1 subunit gamma isoform c;cDNA, FLJ79286, highly similar to T-complex protein 1 subunit gamma	P49368;B3KX11;E9PAQ6;Q2TU64;Q59H77;Q5SZY0;A6NE14;B4DUR8	10	20	20	34.1	60.533	545	9.2344e-121	1.2461	203770000	91074000	112700000
26S protease regulatory subunit 10B;26S proteasome AAA-ATPase subunit RPT4;Proteasome 26S subunit ATPase 6;Proteasome subunit p42;cDNA FLJ57570, highly similar to 26S protease regulatory subunit S10B	PSMC6;SUG2	26S protease regulatory subunit 10B;cDNA FLJ57570, highly similar to 26S protease regulatory subunit S10B	P62333;B4DR91	2	4	4	10.9	45.796	403	9.447e-06	1.2469	3951200	2098000	1853100
cDNA FLJ50763, highly similar to Homo sapiens sarcoglycan, epsilon (SGCE), mRNA;Putative uncharacterized protein SGCE;Brain epsilon-sarcoglycan;Sarcoglycan, epsilon, isoform CRA_d;Epsilon-sarcoglycan;cDNA FLJ52341, highly similar to Homo sapiens sarcoglycan, epsilon (SGCE), mRNA	SGCE;ESG;hCG_17912;UNQ433/PRO840	cDNA FLJ50763, highly similar to Homo sapiens sarcoglycan, epsilon (SGCE), mRNA;epsilon-sarcoglycan isoform 1;epsilon-sarcoglycan isoform 3;Epsilon-sarcoglycan;Uncharacterized protein;cDNA FLJ52341, highly similar to Homo sapiens sarcoglycan, epsilon (SGCE	B7Z2R4;B5MDA7;E9PF60;Q6L8P0;O43556;C9JR67;B4DP78;E9PEH6	6	3	3	6.2	53.434	471	8.0394e-29	1.2478	12826000	4329900	8496200
DnaJ homolog subfamily A member 1;DnaJ protein homolog 2;Heat shock 40 kDa protein 4;Heat shock protein J2;HSDJ;Human DnaJ protein 2;cDNA FLJ76588, highly similar to Homo sapiens DnaJ (Hsp40) homolog, subfamily A, member 1 (DNAJA1), mRNA;DnaJ (Hsp40) homolog, subfamily A, member 1;DnaJ (Hsp40) homolog, subfamily A, member 1, isoform CRA_c;DnaJ (Hsp40) homolog, subfamily A, member 1, isoform CRA_b…	DNAJ2;DNAJA1;HDJ2;HSJ2;HSPF4;hCG_30269;RP11-54K16.1-001	DnaJ homolog subfamily A member 1;HDJ2 protein (Fragment);29 kDa protein	P31689;Q5T7Q0;Q86TL9;B7Z5C0;Q9NXZ8	3	2	2	6	44.868	397	4.5826e-19	1.2491	9852200	3426000	6426200
MM1;Plexin-B2;Plexin B2;PLXNB2 protein;Putative uncharacterized protein Nbla00445	KIAA0315;PLXNB2;RP3-402G11.19-002;Nbla00445	Plexin-B2	O15031;A6QRH2;Q2TBE4;Q3LIB1	6	29	28	15.4	205.12	1838	1.9442e-216	1.2516	242060000	82802000	159260000
Cellular titin isoform PEVK variant 3;Titin, isoform CRA_a;Titin fetal Isoform;Connectin;Rhabdomyosarcoma antigen MU-RMS-40.14;Titin;Cellular titin isoform PEVK variant 4;Titin, isoform CRA_b;Putative uncharacterized protein TTN	hCG_2006859;TTN	>IPI:IPI00940872.2|TREMBL:A2TKE5;D3DPG0;Q8WZ50|ENSEMBL:ENSP00000376219;ENSP00000396805|VEGA:OTTHUMP00000205900 Tax_Id=9606 Gene_Symbol=TTN Titin, isoform CRA_a;>IPI:IPI00759542.1|SWISS-PROT:Q8WZ42-8 Tax_Id=9606 Gene_Symbol=TTN Isoform 8 of Titin;>IPI:IPI00	A2TKE5;D3DPG0;Q8WZ50;Q8WZ42-8;Q8WZ42;Q8WZ42-1;Q8WZ42-2;Q8WZ42-7;Q8WZ42-4;A2TKE6;C0JYZ2;E7ENC6;E9PJ99;Q8WZ42-5;E7ET18;D3DPF9;E7EQE6;Q8WZ42-3;A6NKB1;B1A7R7;E9PPD3	11	1	1	0	3881.2	34942	0.31915	1.2518	10524000	7844900	2678800
Chromosome region maintenance 1 protein homolog;Exportin-1;cDNA FLJ42779 fis, clone BRAWH3005300, highly similar to Exportin-1;cDNA FLJ55480, highly similar to Exportin-1;cDNA, FLJ79380, highly similar to Exportin-1	CRM1;XPO1	Exportin-1	O14980;B3KWD0;B4DR01;B7ZB16	10	15	15	14.8	123.38	1071	1.6964e-104	1.2604	214960000	158790000	56171000
CADM1 protein;Cell adhesion molecule 1;Immunoglobulin superfamily member 4;Nectin-like protein 2;Spermatogenic immunoglobulin superfamily;Synaptic cell adhesion molecule;Tumor suppressor in lung cancer 1;Putative uncharacterized protein DKFZp686F1789	CADM1;IGSF4;IGSF4A;NECL2;SYNCAM;TSLC1;DKFZp686F1789	52 kDa protein;50 kDa protein;CADM1 protein;Isoform 1 of Cell adhesion molecule 1;Protein;Isoform 2 of Cell adhesion molecule 1	A0A4Z1;Q9BY67-1;Q9BY67;Q6MZK6;Q9BY67-2;A4FVB5	8	3	3	5.3	51.533	471	1.1079e-05	1.2606	6057600	2310500	3747100
		3 kDa protein		1	1	1	45.8	2.6248	24	0.015512	1.2639	2169100	744070	1425000
Mitochondrial import inner membrane translocase subunit TIM44;Translocase of inner mitochondrial membrane 44 homolog;Putative uncharacterized protein DKFZp686H05241;Putative mitochondrial inner membrane protein import receptor	MIMT44;TIM44;TIMM44;DKFZp686H05241;hTIM44	Mitochondrial import inner membrane translocase subunit TIM44	O43615;Q53G69;Q6AI07;Q9UPE4	1	4	4	9.1	51.355	452	2.0016e-08	1.2652	2887700	1406900	1480800
40S ribosomal protein S2;40S ribosomal protein S4;Protein LLRep3;Ribosomal protein S2	RPS2;RPS4;rps2	40S ribosomal protein S2;Uncharacterized protein;Similar to Ribosomal protein S2	P15880;Q3KQT6;Q6IPX5;Q8J014;Q8N5L9;E9PQD7	6	3	3	10.2	31.324	293	0.00037374	1.2657	4649700	1893700	2756100
40S ribosomal protein S25	RPS25	40S ribosomal protein S25	P62851	1	3	3	22.4	13.742	125	4.3842e-11	1.2663	15199000	7758100	7440600
Importin subunit beta-3;Importin-5;Karyopherin beta-3;Ran-binding protein 5;cDNA FLJ43041 fis, clone BRTHA3003339, highly similar to Importin beta-3;cDNA FLJ54573, highly similar to Importin beta-3;IPO5 protein	IPO5;KPNB3;RANBP5	Isoform 3 of Importin-5;Isoform 1 of Importin-5;Protein;Isoform 2 of Importin-5	O00410-3;O00410;O00410-1;B3KWG6;B4E0R6;Q9BVS9;O00410-2	21	16	16	14.7	125.54	1115	1.3238e-66	1.2687	121850000	52652000	69197000
GCUNC-45;Protein unc-45 homolog A;Smooth muscle cell-associated protein 1;cDNA FLJ43733 fis, clone TESTI1000545, highly similar to Homo sapiens unc-45 homolog A (UNC45A), transcript variant 3, mRNA;cDNA FLJ77677;Unc-45 homolog A (C. elegans), isoform CRA_a;cDNA FLJ52559, highly similar to Homo sapiens unc-45 homolog A (UNC45A), transcript variant 3, mRNA;cDNA FLJ54108, highly similar to Homo sapi…	SMAP1;UNC45A;hCG_32584	Isoform 1 of Protein unc-45 homolog A;Isoform 2 of Protein unc-45 homolog A;cDNA FLJ54108, highly similar to Homo sapiens smooth muscle cell associated protein-1 (SMAP-1), transcript variant 2, mRNA	Q9H3U1-1;Q9H3U1;Q9H3U1-2;A8K6F7;B4DLE6;B4DZL0	3	5	5	4.9	103.08	944	8.1962e-22	1.2692	37439000	33277000	4161500
Major histocompatibility complex, class I, C;HLA class I histocompatibility antigen, Cw-12 alpha chain;MHC class I antigen Cw*12;HLA-C protein;MHC class I antigen;HLA class I histocompatibility antigen, Cw-15 alpha chain;MHC class I antigen Cw*15;HLA class I histocompatibility antigen, Cw-14 alpha chain;MHC class I antigen Cw*14;HLA class I histocompatibility antigen, Cw-16 alpha chain;MHC class …	DAMA-387C9.3-003;HLA-C;HLAC;HLA-Cw;DAMA-387C9.3-004;DAMA-387C9.3-001;HLA-CW;HLA;DAQB-115I13.1-001;DASS-311G1.3-001;HLC-C;DAQB-115I13.1-003;DASS-311G1.3-003;DAMA-387C9.3-002;MHC class I;DAQB-115I13.1-004;DASS-311G1.3-004;D6S204;HLA-JY3;DAQB-115I13.1-002;DASS-311G1.3-002;HLA-Cw*02023;HLA-B;DAMA-387C9.3-007	Major histocompatibility complex, class I, C;HLA class I histocompatibility antigen, Cw-12 alpha chain;Major histocompatibility complex, class I, C;HLA class I histocompatibility antigen, Cw-15 alpha chain;HLA class I histocompatibility antigen, Cw-14 alph	B0S7Z5;P30508;Q546I6;B0S7Z6;Q07000;C1K0Y5;P30510;C1K0Y4;Q29960-1;Q29960;A7MAP5;B1GYE6;O78179;Q96FQ5;Q29960-2;P30504;Q9TNN7;A2BCW2;A2BCX0;A2BCX5;A2BCY5;A6H582;A6Q0R4;A6YS07;A7MA45;A7MAN2;A7MAP6;A8YQF4;A9JPG2;A9QUT9;B0BK81;B0BKZ5;B0FZC9;B1PC45;B1PL06;B1PMU8;B2G4X1;B3W6H1;B5AFW1;B5AU43;B5B2D3;B6ETP9;B8Y6A9;B9WPQ7;C0KJX2;C0KJY2;C0KK04;C0KXH1;C0L3D7;C0M119;C5IZM2;C5IZM6;C5IZV3;C5IZY8;C5IZZ1;C5IZZ3;C5I…	33	15	0	44.1	41.466	372	0	1.2751	871290000	400380000	470910000
[truncated: 253 more rows]

## Sheet: non-biotinylated proteins
Protein Names	Gene Names	Protein Descriptions	Uniprot	Proteins	Peptides	Unique Peptides	Sequence Coverage [%]	Mol. Weight [kDa]	Sequence Length	PEP	Ratio H/L Normalized	Intensity	Intensity L	Intensity H
[truncated: 2,509 more rows]
