# Supplementary material for: Clathrin-independent pathways do not contribute significantly to endocytic flux
Source: eLife journal article supplement (doi:10.7554/elife.03970), 2014-09-16
Supplement: supp [file elife-03970-supp-v1.zip]

## Figure 2-figure supplement 2

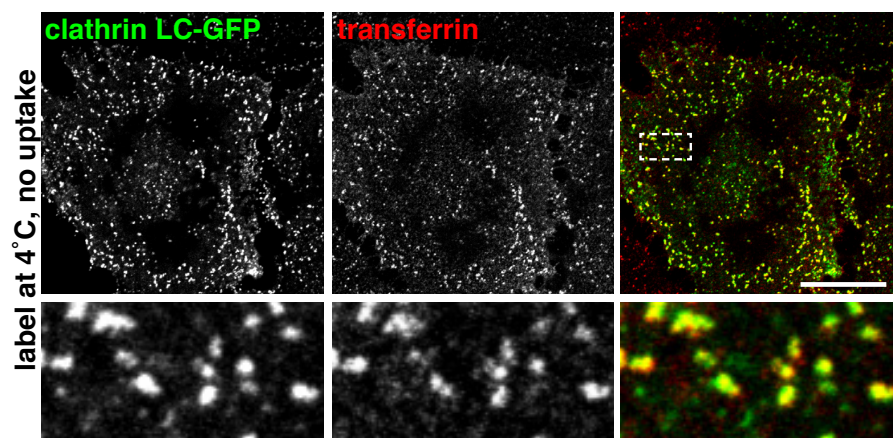

**Figure 2-figure supplement 2. Surface-bound transferrin is highly concentrated within clathrin-coated pits.** Cells were transfected with clathrin light chain-GFP, cooled to 4°C, labelled with transferrin-546, fixed, and imaged. Bar is 20µm. The boxed region is shown in the lower panels.
