# Supplementary material for: Clathrin-independent pathways do not contribute significantly to endocytic flux
Source: eLife journal article supplement (doi:10.7554/elife.03970), 2014-09-16
Supplement: supp [file elife-03970-supp-v1.zip]

## Figure 8-figure supplement 1

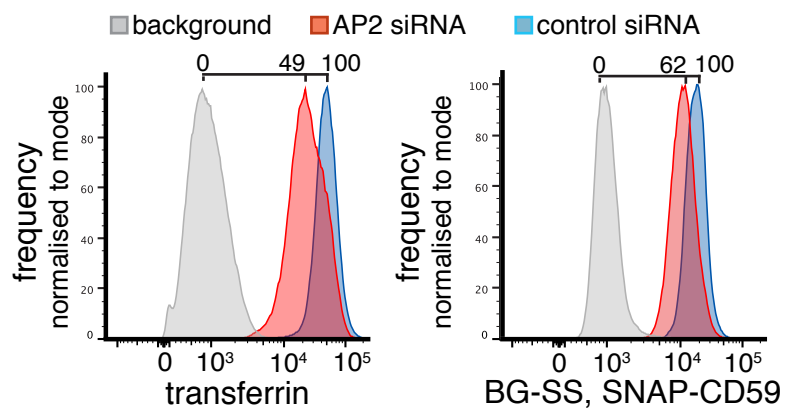

**Figure 8-figure supplement 1. Reduction of AP2 (alpha adaptin) levels affects the amount of uptake of both transferrin and SNAP-CD59, 50 hours after siRNA transfection.** Cells stably expressing SNAP-CD59 were incubated at 37°C for 15 minutes with BG-SS-546 and transferrin-647. Surface label was removed with MESNa and acid wash and then the cells were analysed by flow cytometry.
