# Supplementary material for: Clathrin-independent pathways do not contribute significantly to endocytic flux
Source: eLife journal article supplement (doi:10.7554/elife.03970), 2014-09-16
Supplement: supp [file elife-03970-supp-v1.zip]

**Figure 5-figure supplement 1**

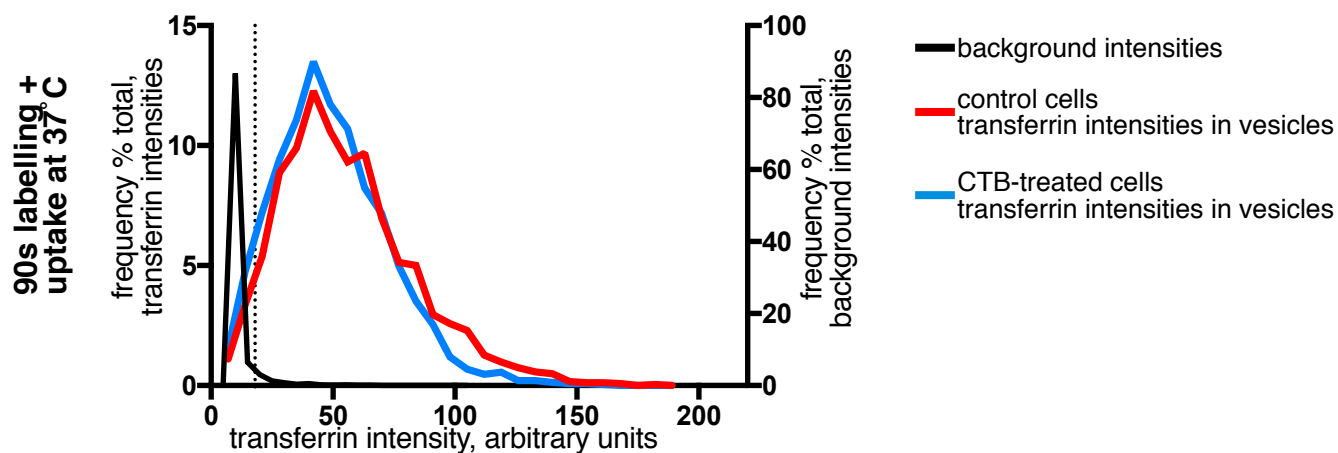

**Figure 5-figure supplement 1. Effect of CTB-binding on transferrin load in endocytic vesicles defined by uptake of GPI-linked protein.** Analysis of the transferrin cargo load of endocytic vesicle objects identified as in Figure 3A after 90s of uptake in control and CTB-labeled cells as shown. Cells were stably expressing SNAP-CD59, endocytic vesicles were defined by BG-SS-488 labeling and MESNa treatment. Frequency distribution of transferrin intensities for the same vesicles after offsetting the transferrin channel by 500nm provides a set of background intensities, shown as a black line and not plotted to the same y-axis scale. Cut-off is shown as a dotted line and corresponds to the 95 percentile for the offset values.
