# Supplementary material for: Clathrin-independent pathways do not contribute significantly to endocytic flux
Source: eLife journal article supplement (doi:10.7554/elife.03970), 2014-09-16
Supplement: supp [file elife-03970-supp-v1.zip]

## Figure 7-figure supplement 1

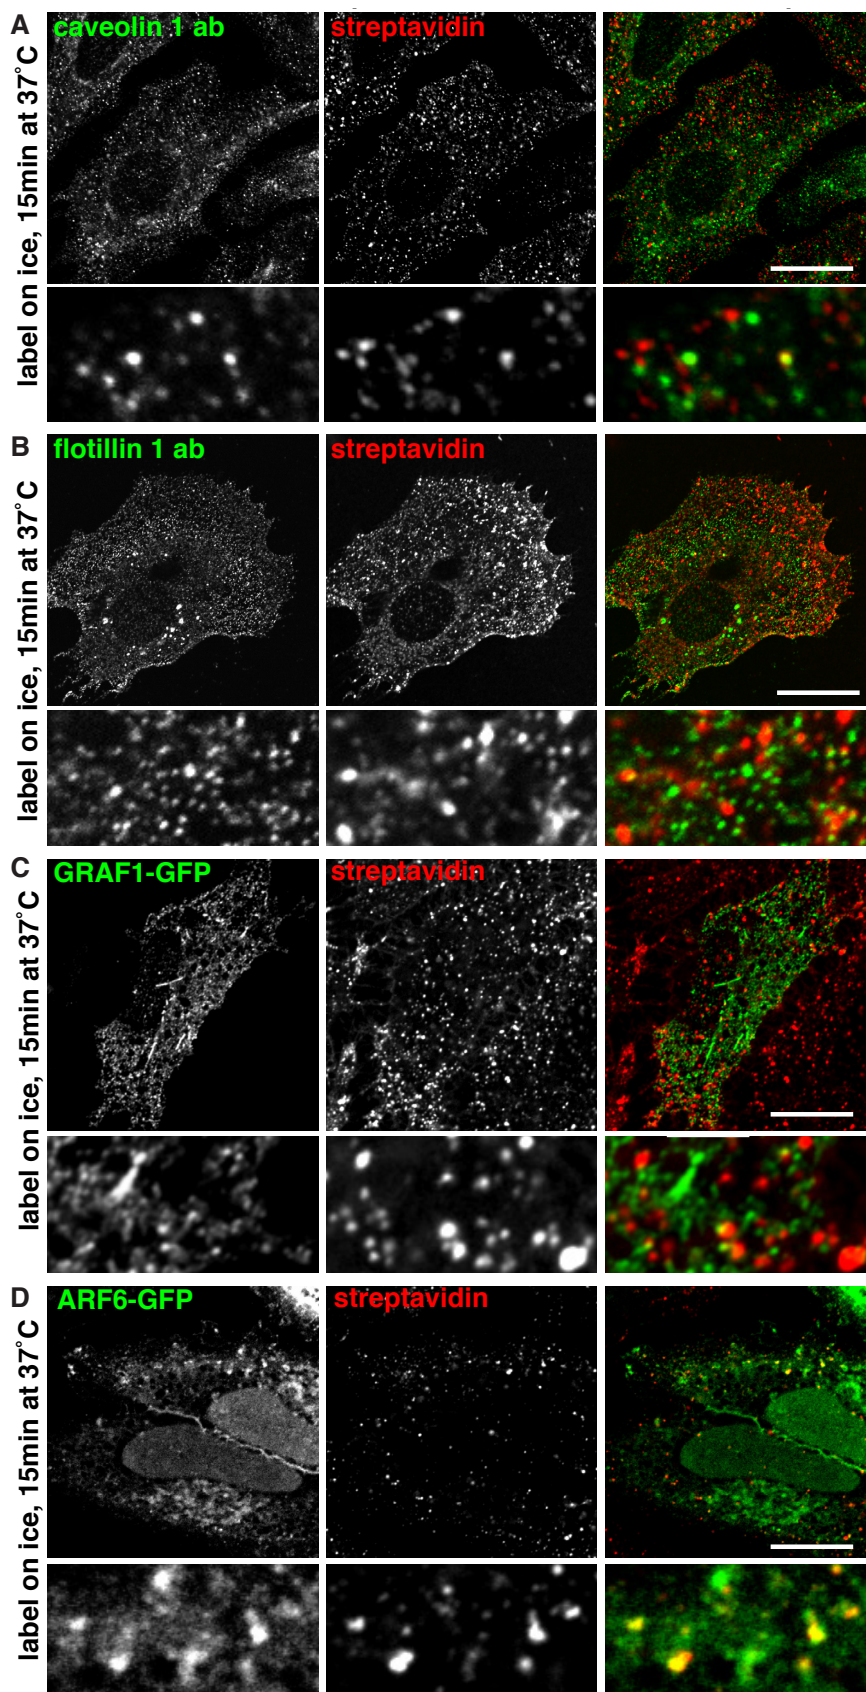

**Figure 7-figure supplement 1. Labelling of the total population of endocytosed proteins does not provide evidence for significant protein flux through clathrin-independent endocytic pathways. A, B, C, D.** Confocal images showing distribution of the marker indicated (caveolin 1, flotillin 1, GRAF1, ARF6), together with internalised biotinylated protein after 15min of endocytosis. Labelling was done as in Figure 1A. This is the same experiment as shown in Figure 7, but a longer time-point.
