# Supplementary material for: Clathrin-independent pathways do not contribute significantly to endocytic flux
Source: eLife journal article supplement (doi:10.7554/elife.03970), 2014-09-16
Supplement: supp [file elife-03970-supp-v1.zip]

## Figure 8-figure supplement 2

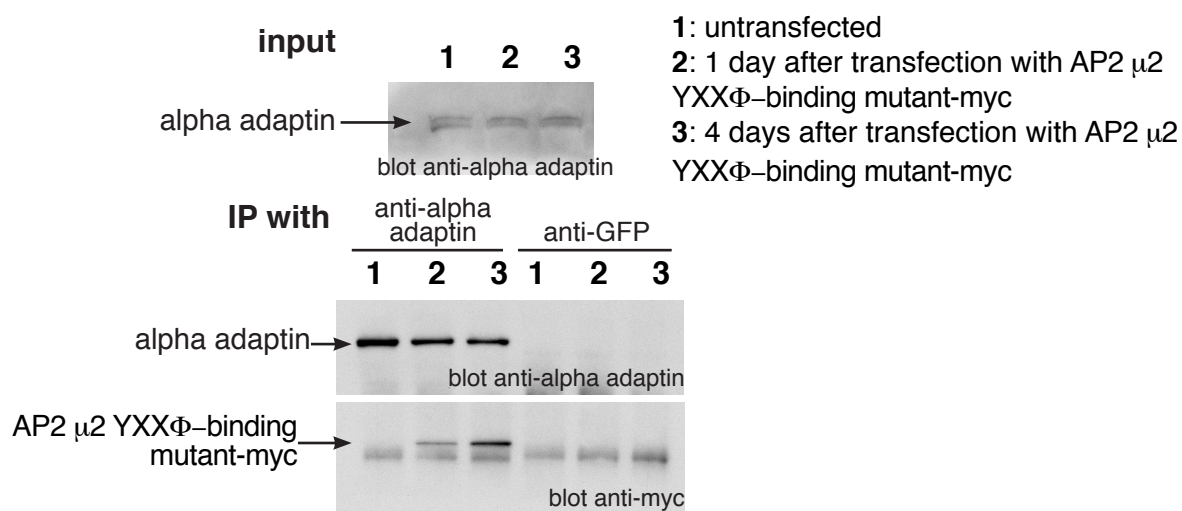

**Figure 8-figure supplement 2. Incorporation of mutant  $\mu$ 2 subunits into AP2 complexes.** Cells were transfected with plasmids expressing the  $\mu$ 2 YXX $\Phi$ -binding mutant-myc as shown. Cell lysates were subjected to immunoprecipitation with anti-alpha adaptin, or as a negative control anti-GFP antibodies. Immunoprecipitates were analysed by Western blotting with anti-alpha adaptin and anti-myc antibodies.
