# Supplementary material for: Clathrin-independent pathways do not contribute significantly to endocytic flux
Source: eLife journal article supplement (doi:10.7554/elife.03970), 2014-09-16
Supplement: supp [file elife-03970-supp-v1.zip]

**Figure 2-figure supplement 4**

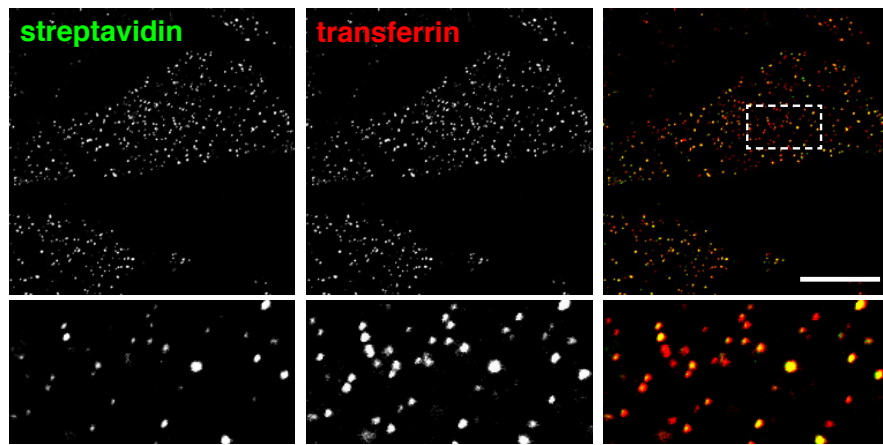

**Figure 2-figure supplement 4. Co-localisation between internalised sulfo-NHS-SS-biotin and transferrin after labelling at 4°C and 90s of internalisation at 37°C.** Confocal images of co-localisation of total membrane protein, labeled at 4°C with sulfo-NHS-SS-biotin, and transferrin-546. Internalisation was for 90s at 37°C. Biotin was detected with streptavidin-488 after MESNA treatment. Note that labelling with biotin and transferrin at 4°C was carried out consecutively, so transferrin was not biotinylated. Zoomed in area of the lower panel is indicated with a box. Bar is 20µm.
