# Supplementary material for: Clathrin-independent pathways do not contribute significantly to endocytic flux
Source: eLife journal article supplement (doi:10.7554/elife.03970), 2014-09-16
Supplement: supp [file elife-03970-supp-v1.zip]

## Figure 3-figure supplement 1

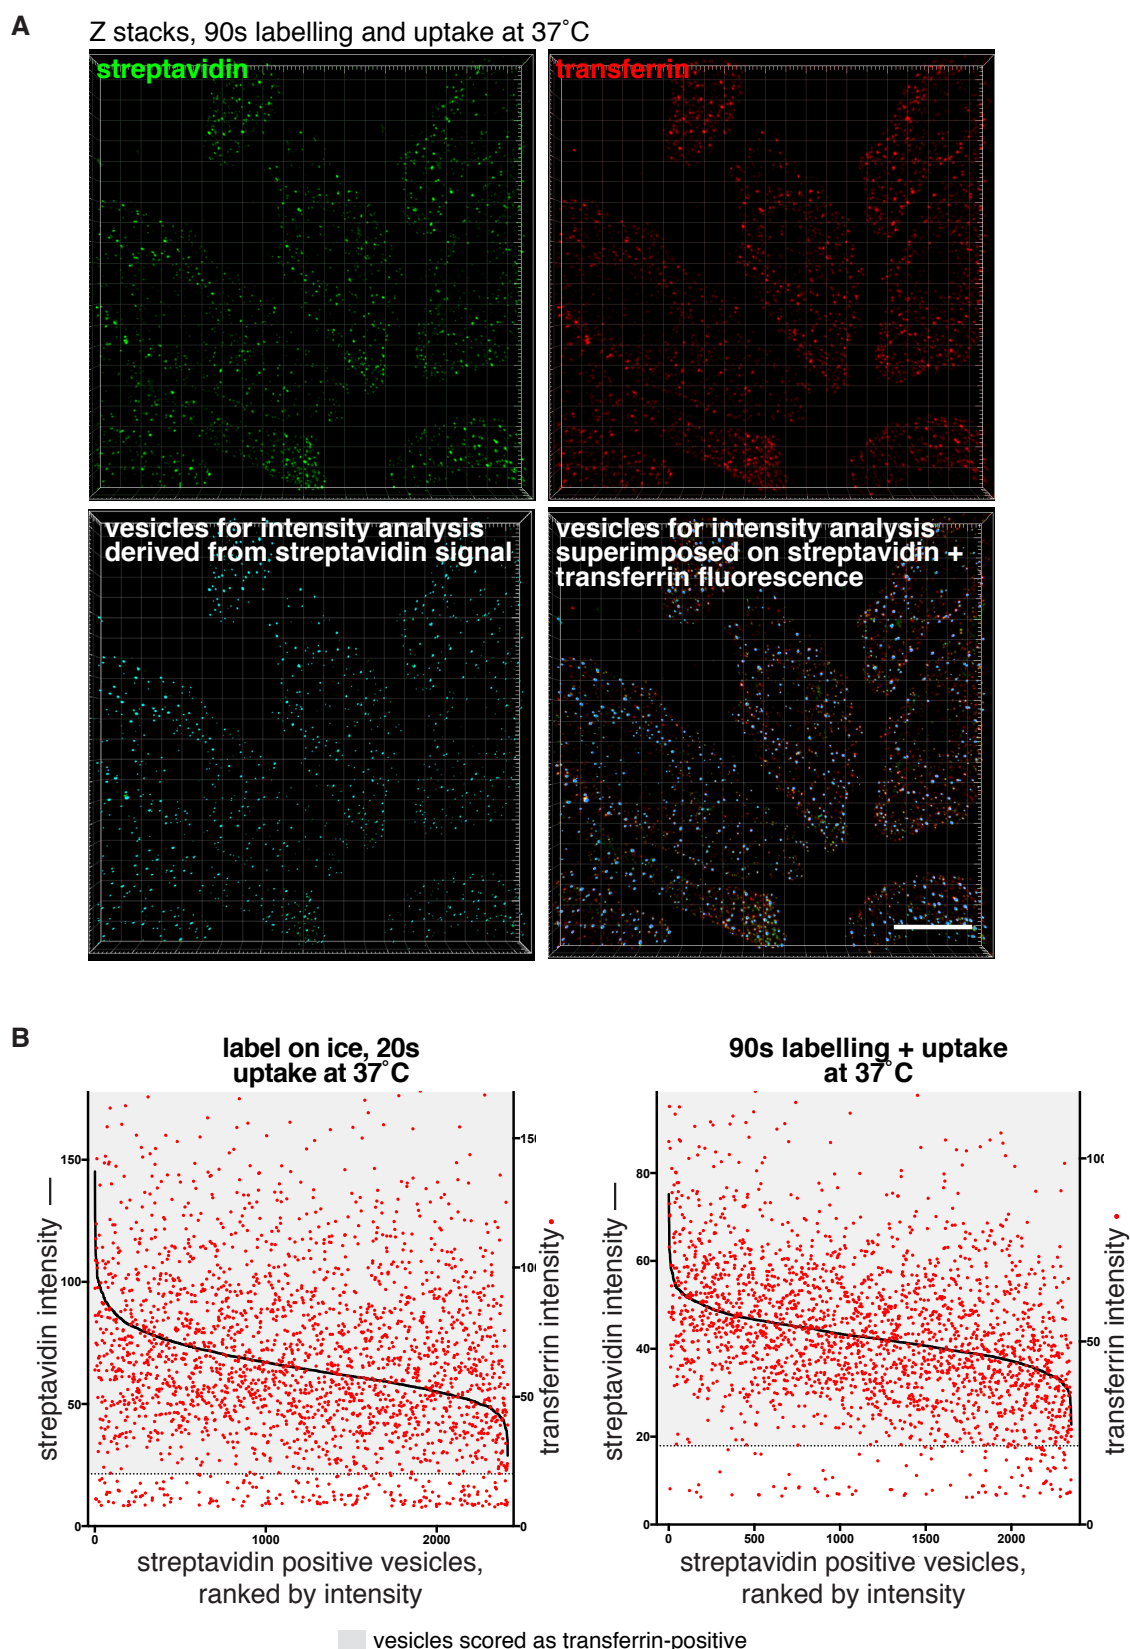

**Figure 3-figure supplement 1. Correlation between streptavidin (total endocytosed protein) and transferrin intensities in endocytic vesicles.** **A.** Projections of confocal z-stacks showing raw fluorescence images of internalised biotin, labelled with streptavidin, and transferrin, after 90s internalisation. The streptavidin image was used to identify endocytic vesicles using Imaris software as displayed in the lower left panel. The lower right panel displays the software-recognised vesicle objects superimposed on streptavidin and transferrin fluorescence. Bar 15µm. **B.** Correlation between the mean fluorescence intensity of streptavidin and transferrin present in individual endosomes. Individual endosomes have been ranked from high to low streptavidin intensity. Red dots correspond to the transferrin intensity in the particular endosome. Dotted line represents the cut-off for transferrin-positive endosomes, based on 95th percentile of background intensities as described in the main text. Transferrin positive endosomes are within the greyed area.
