# Supplementary material for: Clathrin-independent pathways do not contribute significantly to endocytic flux
Source: eLife journal article supplement (doi:10.7554/elife.03970), 2014-09-16
Supplement: supp [file elife-03970-supp-v1.zip]

## Figure 2-figure supplement 7

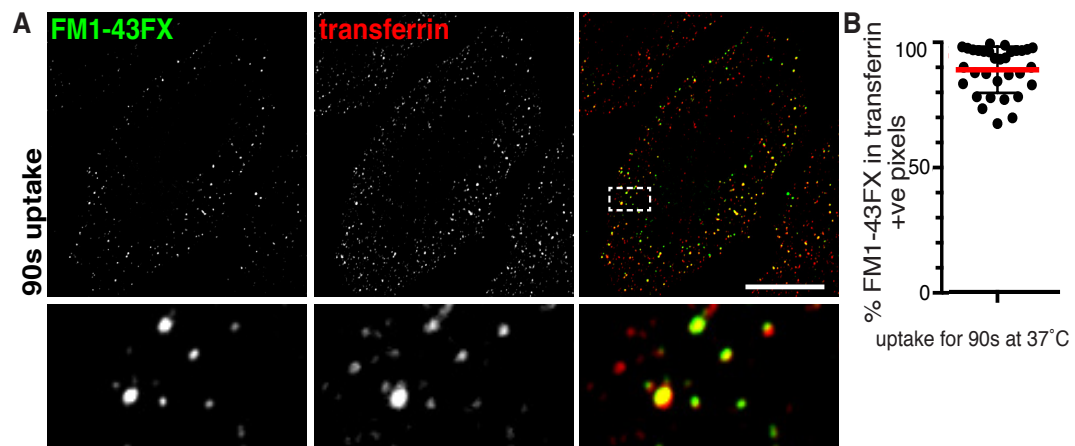

**Figure 2-figure supplement 7. Absence of membrane-positive, transferrin-negative vesicles.** **A.** Cells were labelled with the membrane dye FM1-43FX and transferrin at 4°C. After internalisation at 37°C for 90 seconds, residual plasma membrane dye was removed by washes with ice-cold PBS. Cells were imaged at 4°C without fixation. Transferrin-positive puncta that do not contain FM1-43FX are likely to represent clathrin-coated pits that have not budded from the plasma membrane. Contrast levels have been set so that residual background plasma membrane staining with FM1-46FX is excluded. Zoomed in area of the lower panel is indicated with a box. Bar is 20µm. **B.** Quantification of the proportion of FM1-43FX signal detected in intracellular puncta that is present in transferrin-positive pixels. Bars are mean, SD.
