# Supplementary material for: Clathrin-independent pathways do not contribute significantly to endocytic flux
Source: eLife journal article supplement (doi:10.7554/elife.03970), 2014-09-16
Supplement: supp [file elife-03970-supp-v1.zip]

**Figure 1-figure supplement 1**

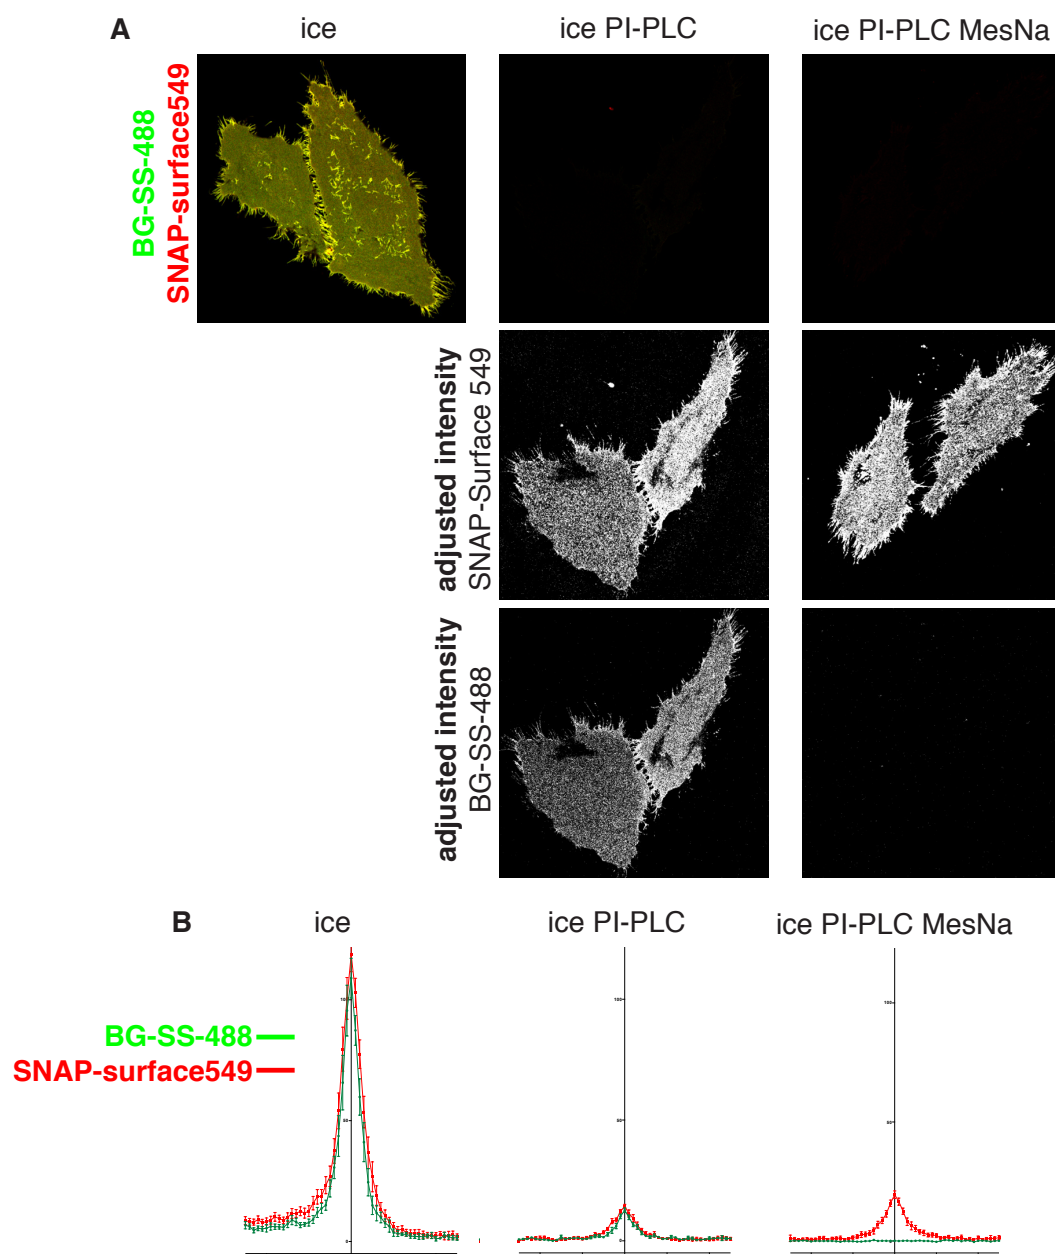

**Figure 1-figure supplement 1. Removal of extracellular fluorophore from BG-SS-fluorophore labelled SNAP-tag by reduction with MESNa is highly efficient.** **A.** Cells expressing SNAP-GPI were simultaneously labeled at 4°C with BG-SS-488 and SNAP-surface549. The latter is not reducible. They were then treated with PI-PLC or PI-PLC and then MESNa. Both treatments reduced the amount of label significantly (top row of images). However when remaining cell surface label was inspected by adjusting the intensity post-acquisition (lower panels), differential effects in the removal of the two fluorophores were observed. PI-PLC reduced the signal of both fluorophores evenly. However, when cells were treated with PI-PLC followed by MESNa the levels of reducible BG-SS-488 become practically undetectable. **B.** Quantification of images from the same experiment shown in A. Images used for quantification were confocal cross sections of cells. Line profiles across the plasma membrane of the cell were combined to produce average traces of fluorescence intensity. The removal of BG-SS-488 in the MESNa + PI-PLC treated cells is clearly more efficient than removal of SNAP-surface549.
