# Supplementary material for: Clathrin-independent pathways do not contribute significantly to endocytic flux
Source: eLife journal article supplement (doi:10.7554/elife.03970), 2014-09-16
Supplement: supp [file elife-03970-supp-v1.zip]

## Figure 2-figure supplement 1

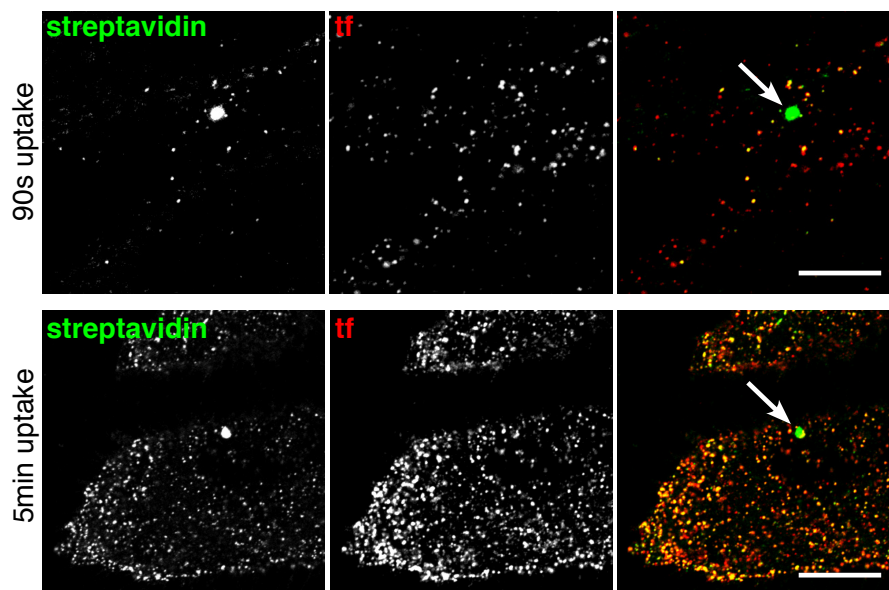

**Figure 2-figure supplement 1. Macropinosomes are readily identified by labelling with sulfo-NHS-SS-biotin.** Cells were labeled with sulfo-NHS-SS-biotin and transferrin-546, allowed to endocytose at 37°C for the times indicated, MESNA-treated, fixed, and stained with streptavidin-488. Occasionally, cells contained larger endocytic structures (>0.5µm) that were intensely labeled with fluorescent streptavidin but did not contain transferrin, despite the presence of transferrin in the medium during incubation at 37°C. These structures correspond to macropinosomes. No clear correlation between their abundance and incubation time at 37°C was observed. Bar is 15µm.
