# Supplementary material for: Clathrin-independent pathways do not contribute significantly to endocytic flux
Source: eLife journal article supplement (doi:10.7554/elife.03970), 2014-09-16
Supplement: supp [file elife-03970-supp-v1.zip]

Figure 2-figure supplement 5

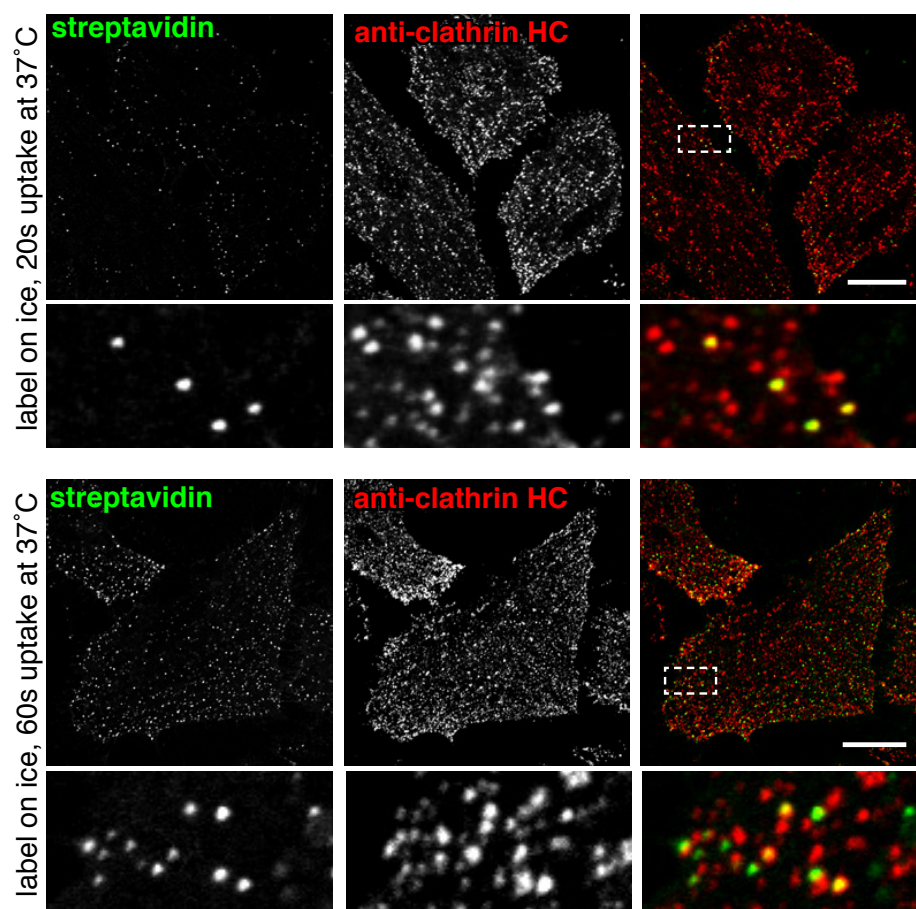

**Figure 2-figure supplement 5. Co-localisation between internalised sulfo-NHS-SS-biotin and clathrin after 20s and 60s of internalisation at 37°C.** HeLa cells labeled at 4°C with sulfo-NHS-SS-biotin, were moved to 37°C for the indicated time-points. Surface biotin was removed by MESNA treatment, the cells were fixed and permeabilised, and then stained with streptavidin-488, and antibodies against clathrin heavy chain by indirect immunofluorescence. Box indicates zoomed region, bars are 20µm. 20s image also shown in Figure 2.
