# Supplementary material for: Clathrin-independent pathways do not contribute significantly to endocytic flux
Source: eLife journal article supplement (doi:10.7554/elife.03970), 2014-09-16
Supplement: supp [file elife-03970-supp-v1.zip]

## Figure 6-figure supplement 1

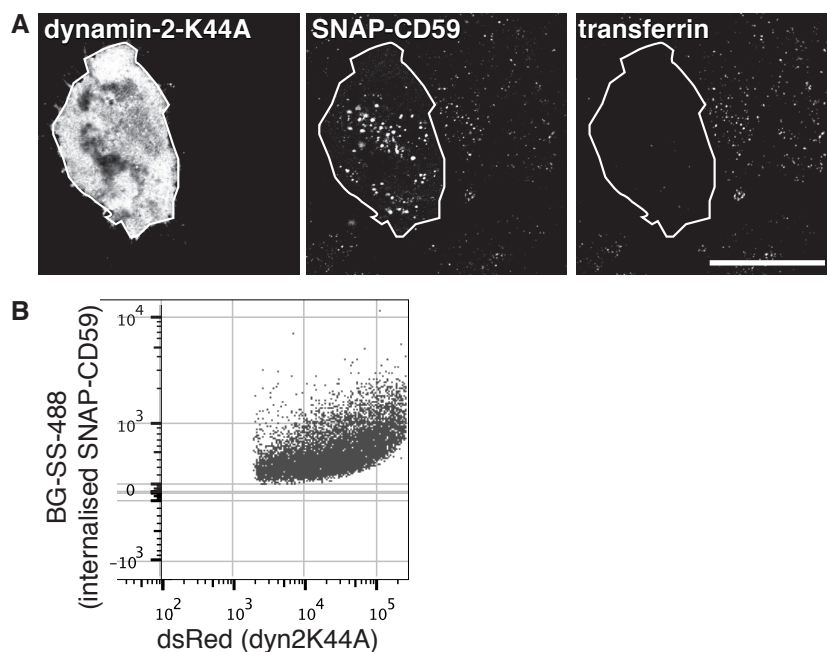

**Figure 6-figure supplement 1. Endocytic structures induced by high dynamin-2-K44A expression. A.** HeLa cells stably expressing SNAP-CD59 and transiently transfected with dynamin-2-K44A-dsRed were labeled with BG-SS-488 and transferrin-647 for 15 min 37°C. Note that the cell shown has a very high level of dynamin-2-K44A expression, and this has induced endocytic structures of various sizes, many of which are much larger than those observed in neighbouring untransfected cells. This is an extreme illustrative example. Bar is 20µm **B.** Flow cytometry measuring internalisation of SNAP-CD59 in the population of cells transfected with dynamin-2-K44A-dsRed as in A. Note that as the expression of dynamin-2-K44A increases, SNAP-CD59 internalisation actually also goes up (Figure 6E).
